# Supplementary material for: Structural Identification of Zotarolimus (ABT-578) Metabolites Generated by Human Liver Microsomes Using Ion-Trap and High-Resolution Time-of-Flight Mass Spectrometry in Combination with the Analysis of Fragmentation Patterns
Source: MDPI journal article supplement (doi:10.3390/metabo13101093), 2023-10-19

**Structural Identification of Zotarolimus (ABT-578) Metabolites Generated by Human Liver Microsomes Using Ion-Trap and High-Resolution Time-of-Flight Mass Spectrometry in Combination with the Analysis of Fragmentation Patterns**

Touraj Shokati, PhD,\* Seth H. Drake, BS,\* Jost Klawitter, PhD,\* Jelena Klawitter, PhD,\* and Uwe Christians, MD, PhD\*

*\*iC42 Clinical Research and Development, Department of Anesthesiology, School of Medicine, University of Colorado Anschutz Medical Campus, Aurora, CO, USA*

**Supplemental Digital Contents**

# Identified Metabolites of Zotarolimus after Incubation with Human Liver Microsomes (HLM)

---

## **Desmethyl Metabolites, m/z = 974.54609**

- 1) 16-O-Desmethyl Zotarolimus
- 2) 27-O-Desmethyl Zotarolimus
- 3) 39-O-Desmethyl Zotarolimus

## **Didesmethyl Metabolites, m/z = 960.53044**

- 4) 16, 39-O-Didesmethyl Zotarolimus
- 5) 27, 39-O-Didesmethyl Zotarolimus
- 6) 16, 27-O-Didesmethyl Zotarolimus

## **Hydroxy Metabolites, m/z = 1004.55666**

- 7) 45/46-Hydroxy Zotarolimus
- 8) 24-Hydroxy Zotarolimus
- 9) 11-Hydroxy Zotarolimus
- 10) 12-Hydroxy Zotarolimus
- 11) 25-Hydroxy Zotarolimus
- 12) 3/4/5/6-Hydroxy-piperidine Zotarolimus
- 13) 23-Hydroxy Zotarolimus
- 14) 14-Hydroxy Zotarolimus
- 15) 49-Hydroxy Zotarolimus

## **Hydroxy, desmethyl Metabolites, m/z = 990.54101**

- 16) 23/24-hydroxy, 16-O-desmethyl Zotarolimus
- 17) 23/24-hydroxy, 39-O-desmethyl Zotarolimus
- 18) 25-hydroxy, 39-O-desmethyl Zotarolimus
- 19) 11-hydroxy, 39-O-desmethyl Zotarolimus
- 20) Hydroxy-piperidine, 39-O-desmethyl Zotarolimus
- 21) 45/46-hydroxy, 27-O-desmethyl Zotarolimus

## **Dihydroxy Metabolites, m/z = 1020.55157**

- 22) 11,24-Dihydroxy Zotarolimus
- 23) 12,24-Dihydroxy Zotarolimus
- 24) 11,47/48-Dihydroxy Zotarolimus

## **Structure and MS Fragmentation of Zotarolimus**

# Structural Formula of Zotarolimus

---

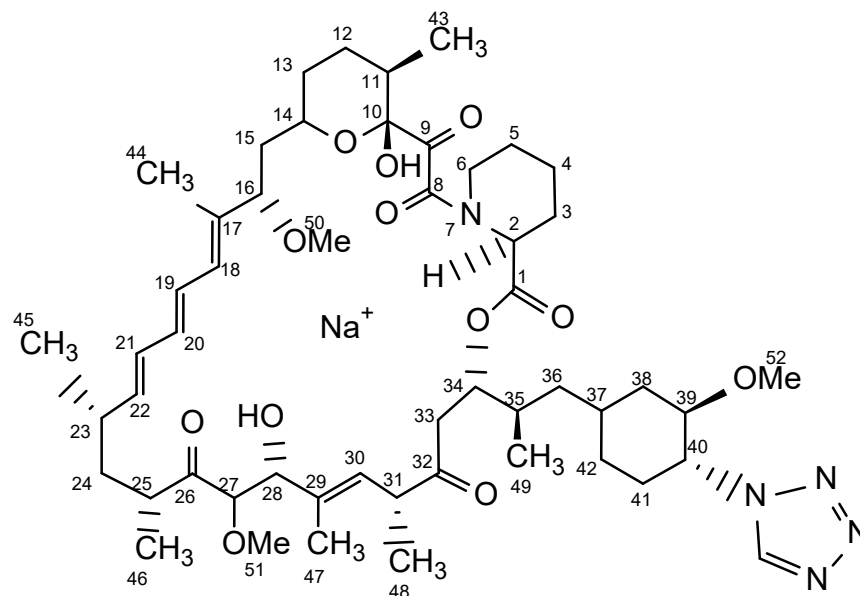

[Zotarolimus- $\text{Na}$ ] $^+$

Chemical Formula:  $\text{C}_{52}\text{H}_{79}\text{N}_5\text{NaO}_{12}^+$

Exact Mass: 988.56174

# Structural Formula of Zotarolimus Isomers

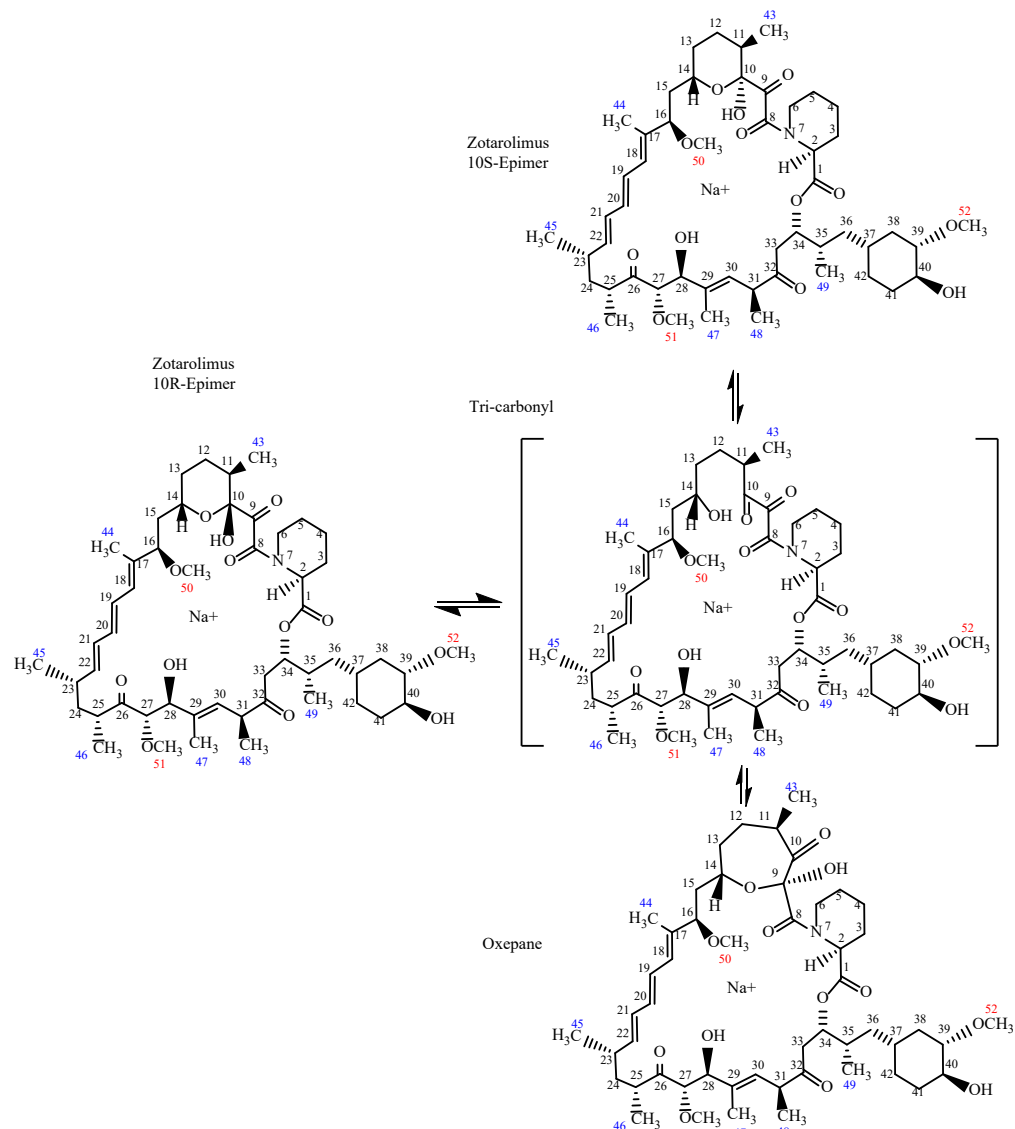

# Total Ion Chromatogram of Zotarolimus Measured by TOF

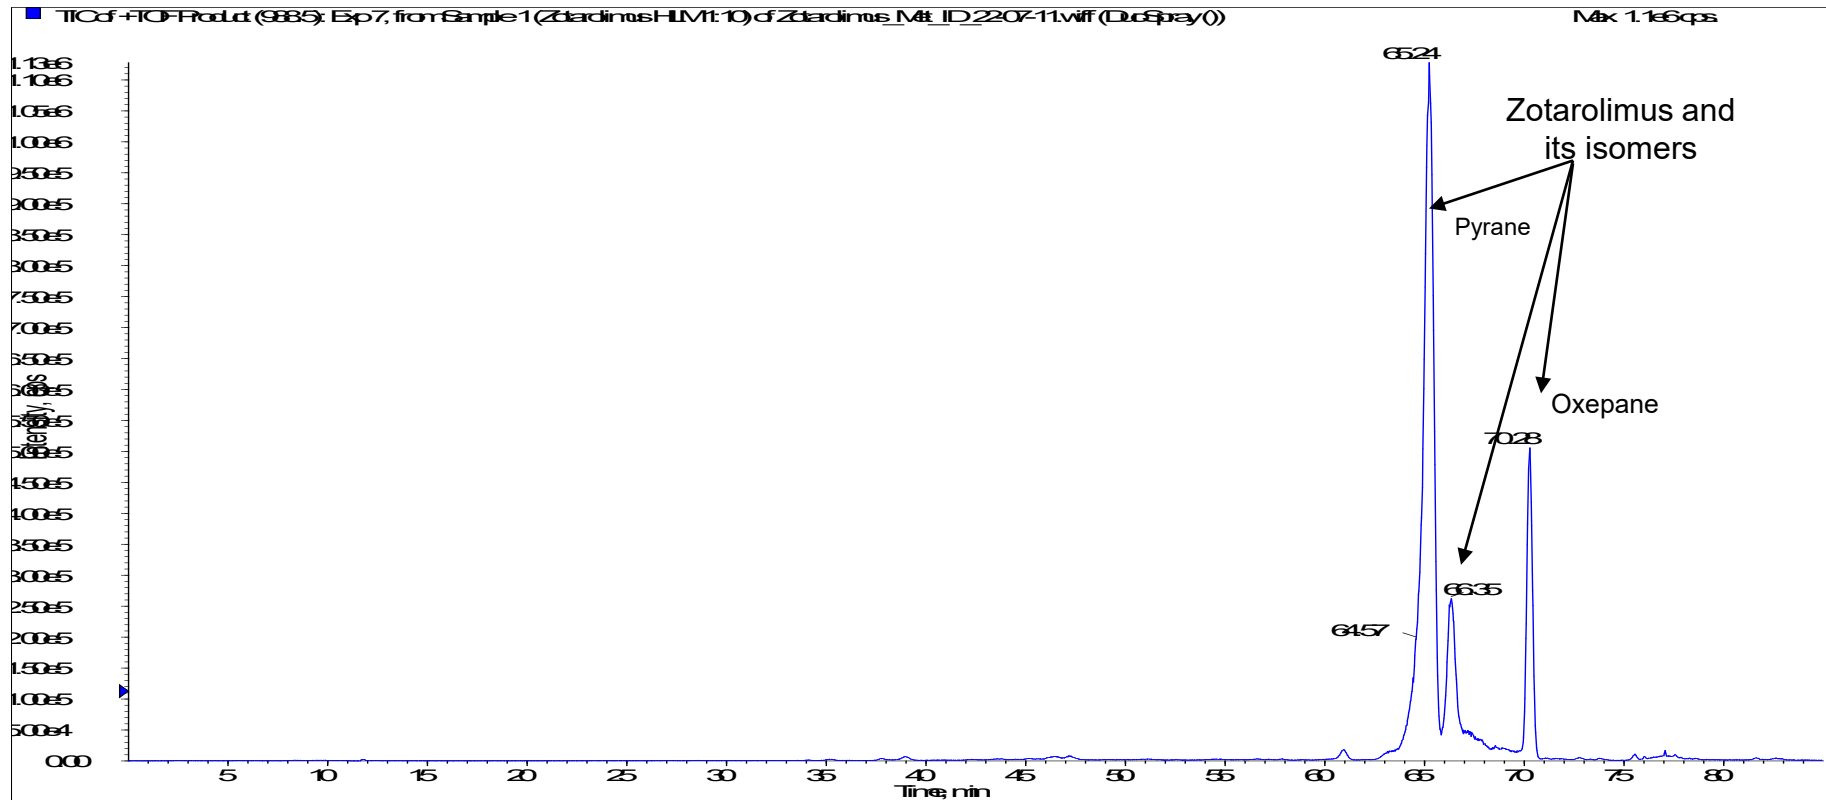

## Exact Masses of Zotarolimus Adducts and Their Isotopic Pattern Measured by TOF

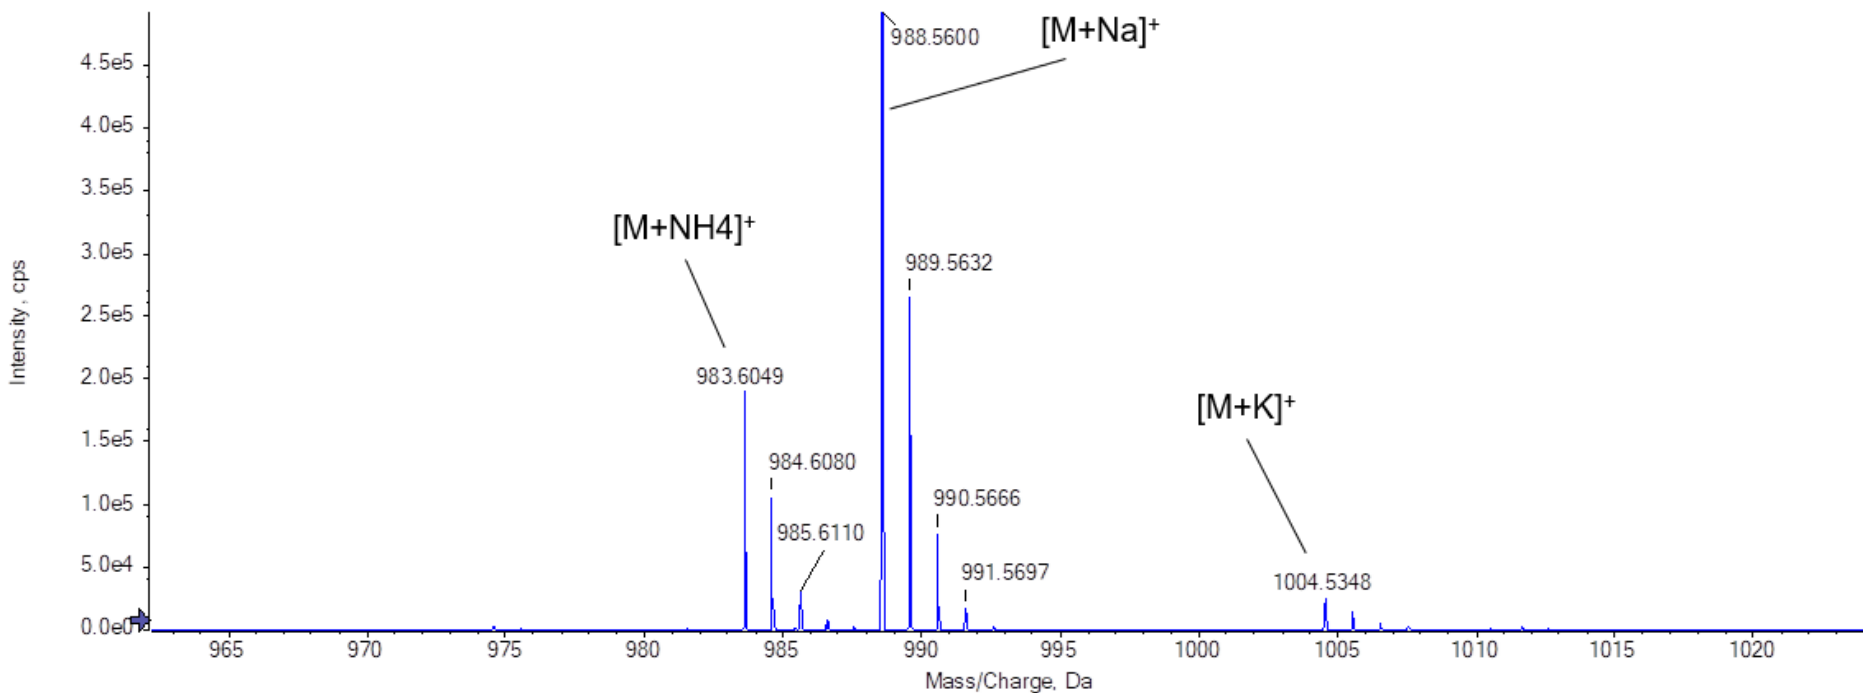

| Zotarolimus  | theoretical mass | measured mass | $\Delta$ ppm |
|--------------|------------------|---------------|--------------|
| $[M+Na]^+$   | 988.56174        | 988.56000     | 1.8          |
| $[M+NH_4]^+$ | 983.60635        | 983.60490     | 1.5          |
| $[M+K]^+$    | 1004.53568       | 1004.53480    | 0.9          |

# MS Spectrum of Zotarolimus, CE = 75 eV, DP = 135 V

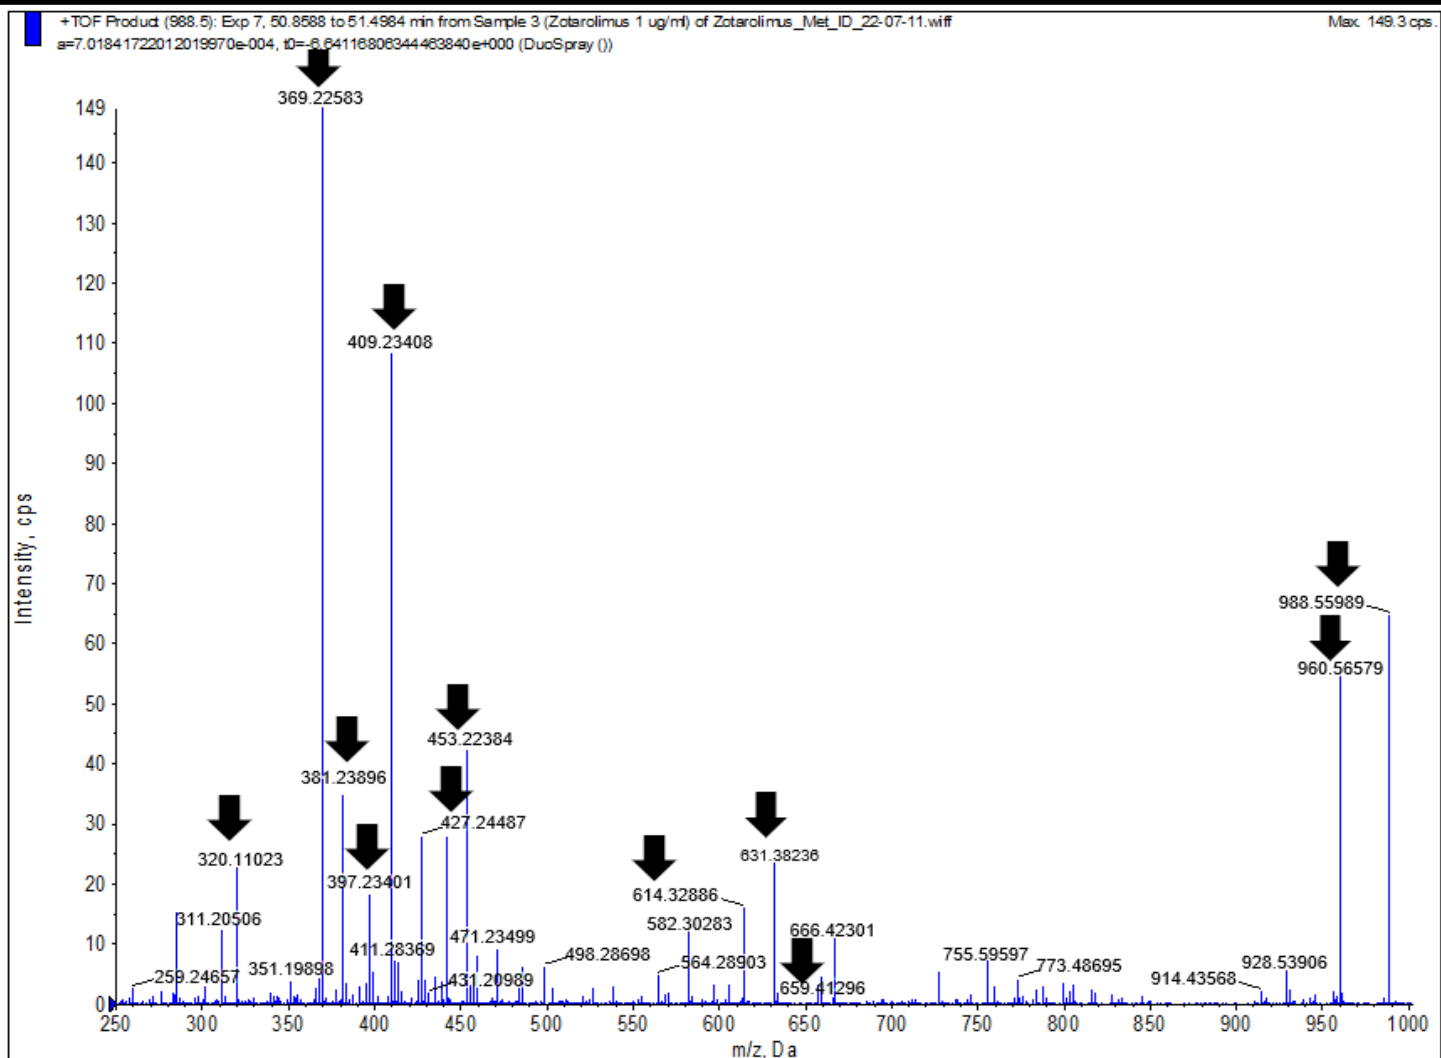



# Zotarolimus Fragmentation Pathway

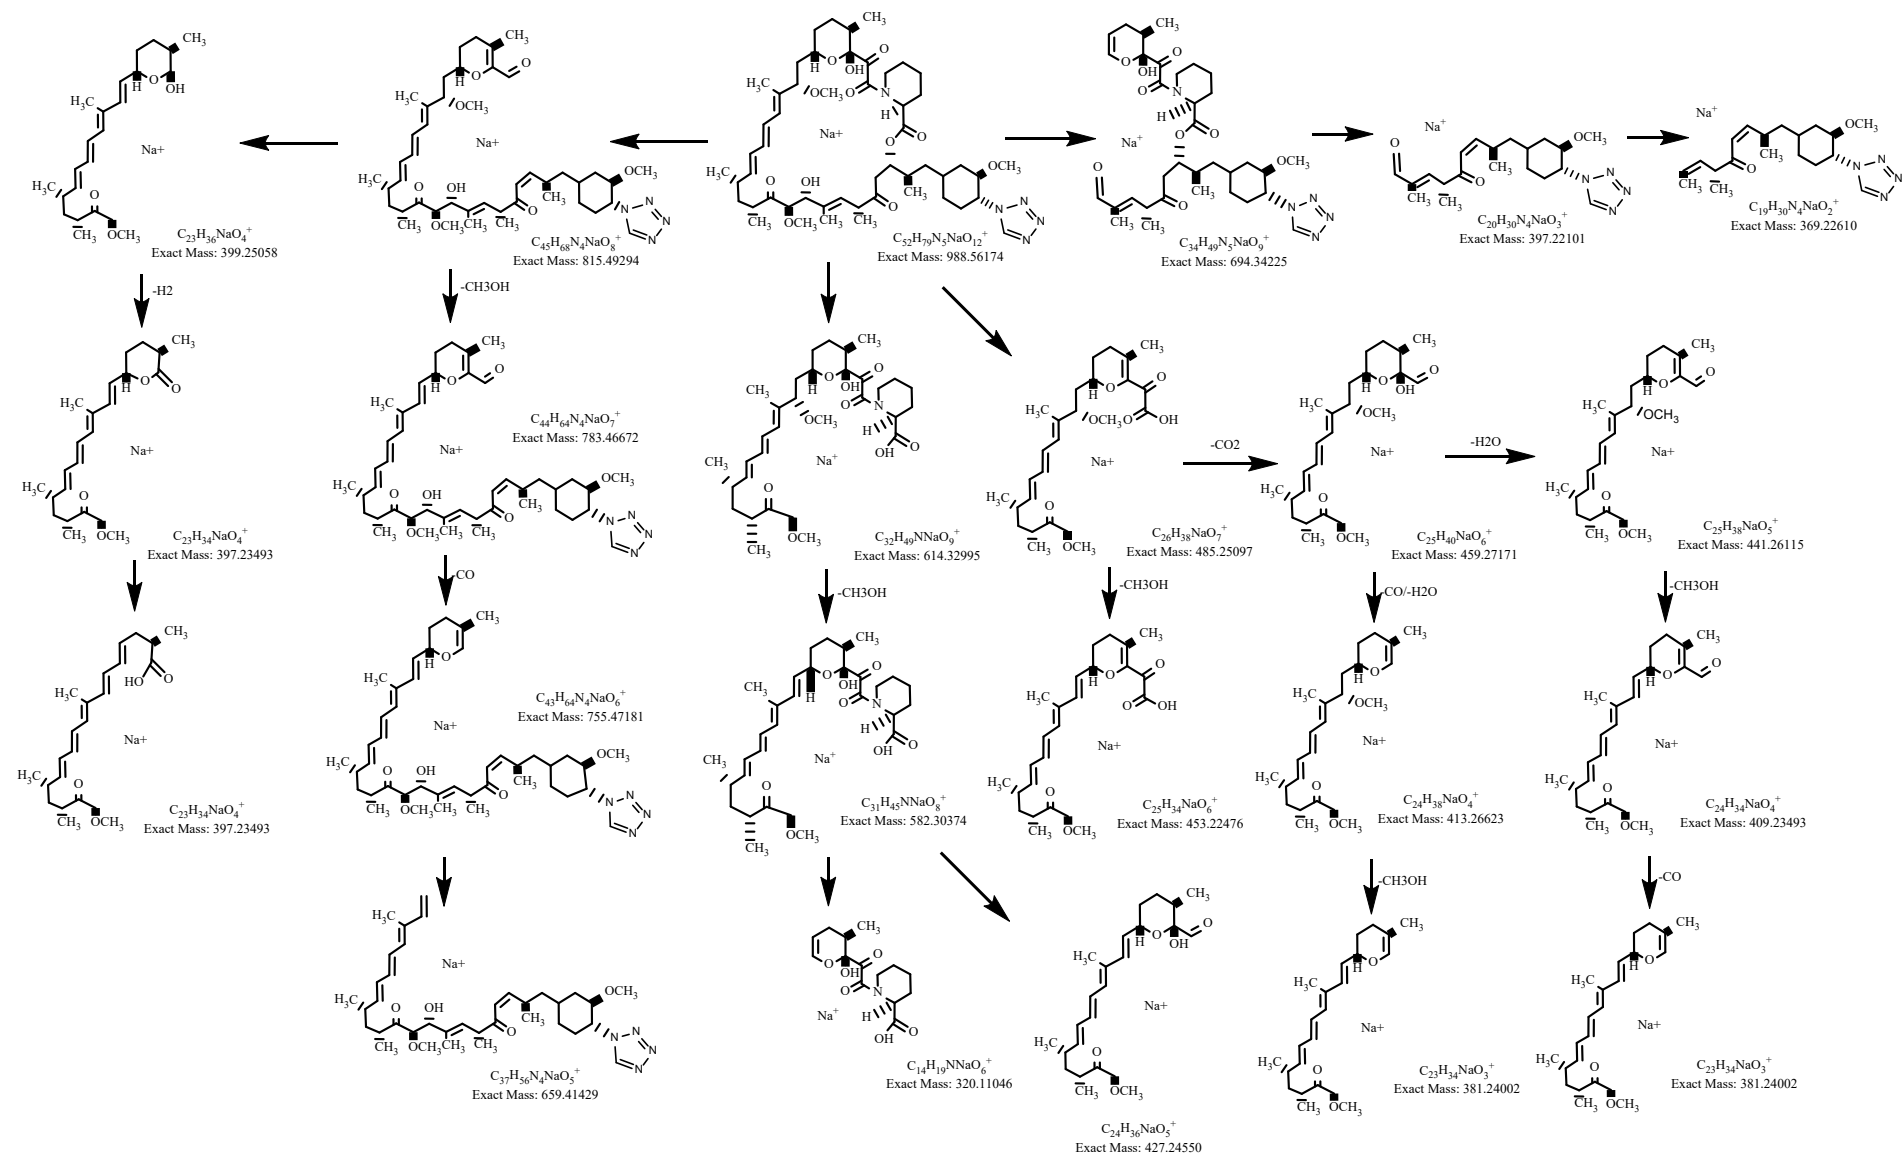

# Zotarolimus Fragmentation Pathway Continued

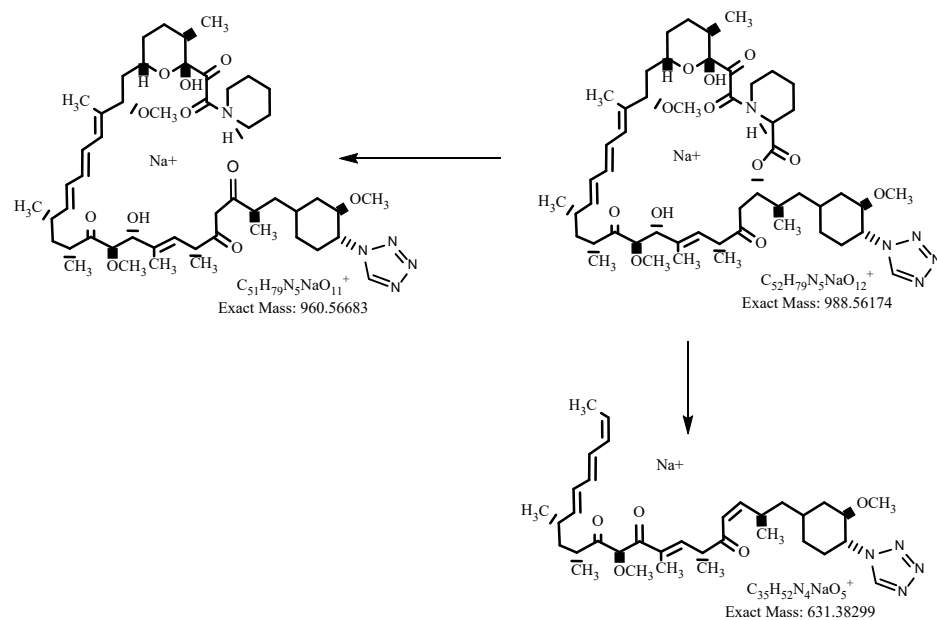

## $\Delta$ ppm of Zotarolimus Fragments Measured by TOF

---

| Fragment No. | theoretical mass | measured mass | $\Delta$ ppm |
|--------------|------------------|---------------|--------------|
| 1            | 320.11046        | 320.11023     | 0.7          |
| 2            | 369.22610        | 369.22583     | 0.7          |
| 3            | 381.24002        | 381.23896     | 2.8          |
| 4            | 397.23493        | 397.23401     | 2.3          |
| 5            | 409.23493        | 409.23408     | 2.1          |
| 6            | 427.24550        | 427.24487     | 1.5          |
| 7            | 441.26115        | 441.26068     | 1.1          |
| 8            | 453.22476        | 453.22384     | 2.0          |
| 9            | 582.30374        | 582.30283     | 1.6          |
| 10           | 614.32995        | 614.32886     | 1.8          |
| 11           | 631.38299        | 631.38236     | 1.0          |
| 12           | 659.41429        | 659.41296     | 2.0          |
| 13           | 960.56683        | 960.56579     | 1.1          |
| 14           | 988.56174        | 988.55989     | 1.9          |

**Hydroxy Zotarolimus Metabolites,  $m/z = 1004.55666$**

# Hydroxy Zotarolimus Metabolites Structures, m/z = 1004.55666

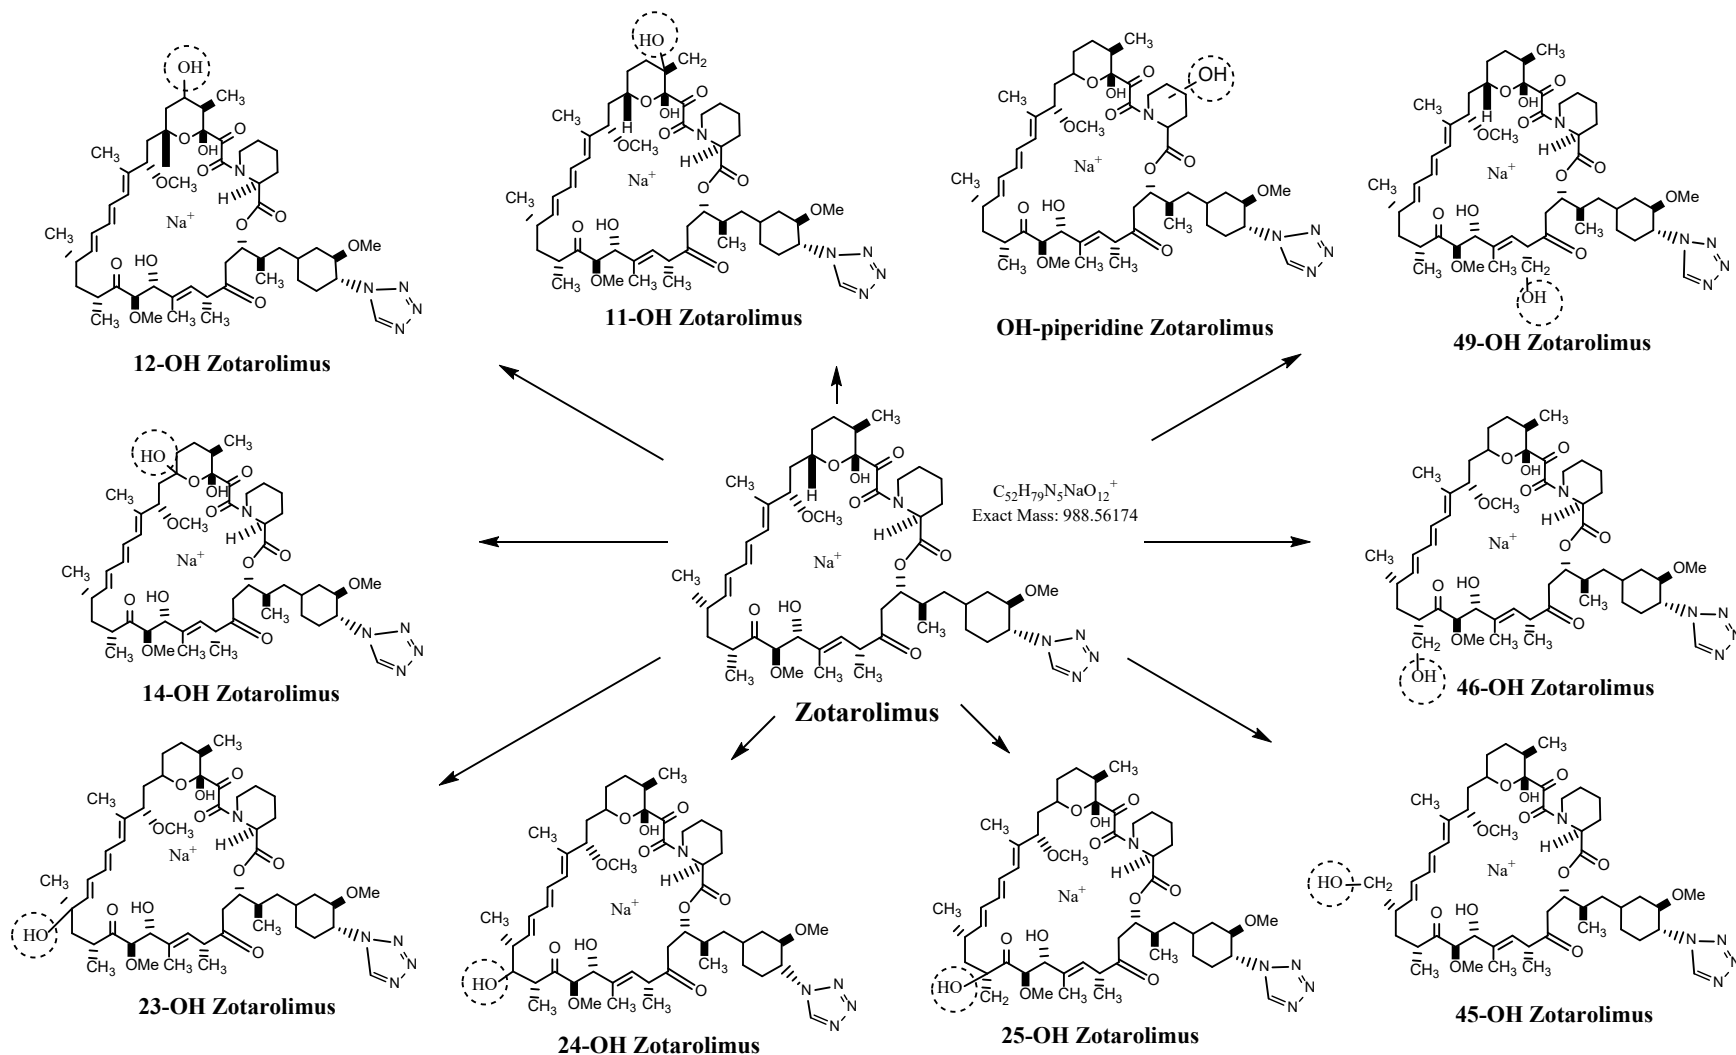

## 45- and 46-Hydroxy Zotarolimus, m/z = 1004.55666

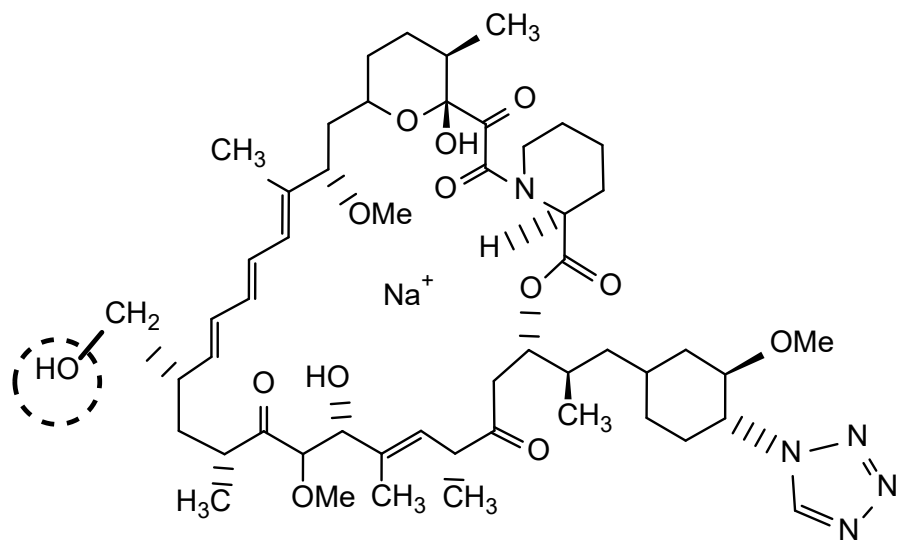

45-hydroxy zotarolimus

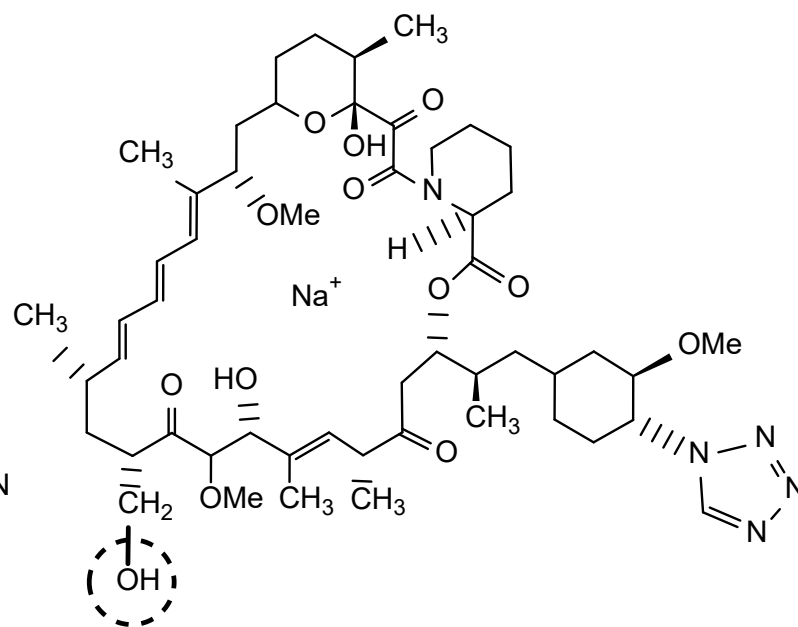

46-hydroxy zotarolimus

Chemical Formula:  $\text{C}_{52}\text{H}_{79}\text{N}_5\text{NaO}_{13}^+$

Exact Mass: 1004.55666

# 45- and 46-Hydroxy Zotarolimus Metabolites

## Extracted Ion Chromatogram (EIC), $m/z = 1004.55666$

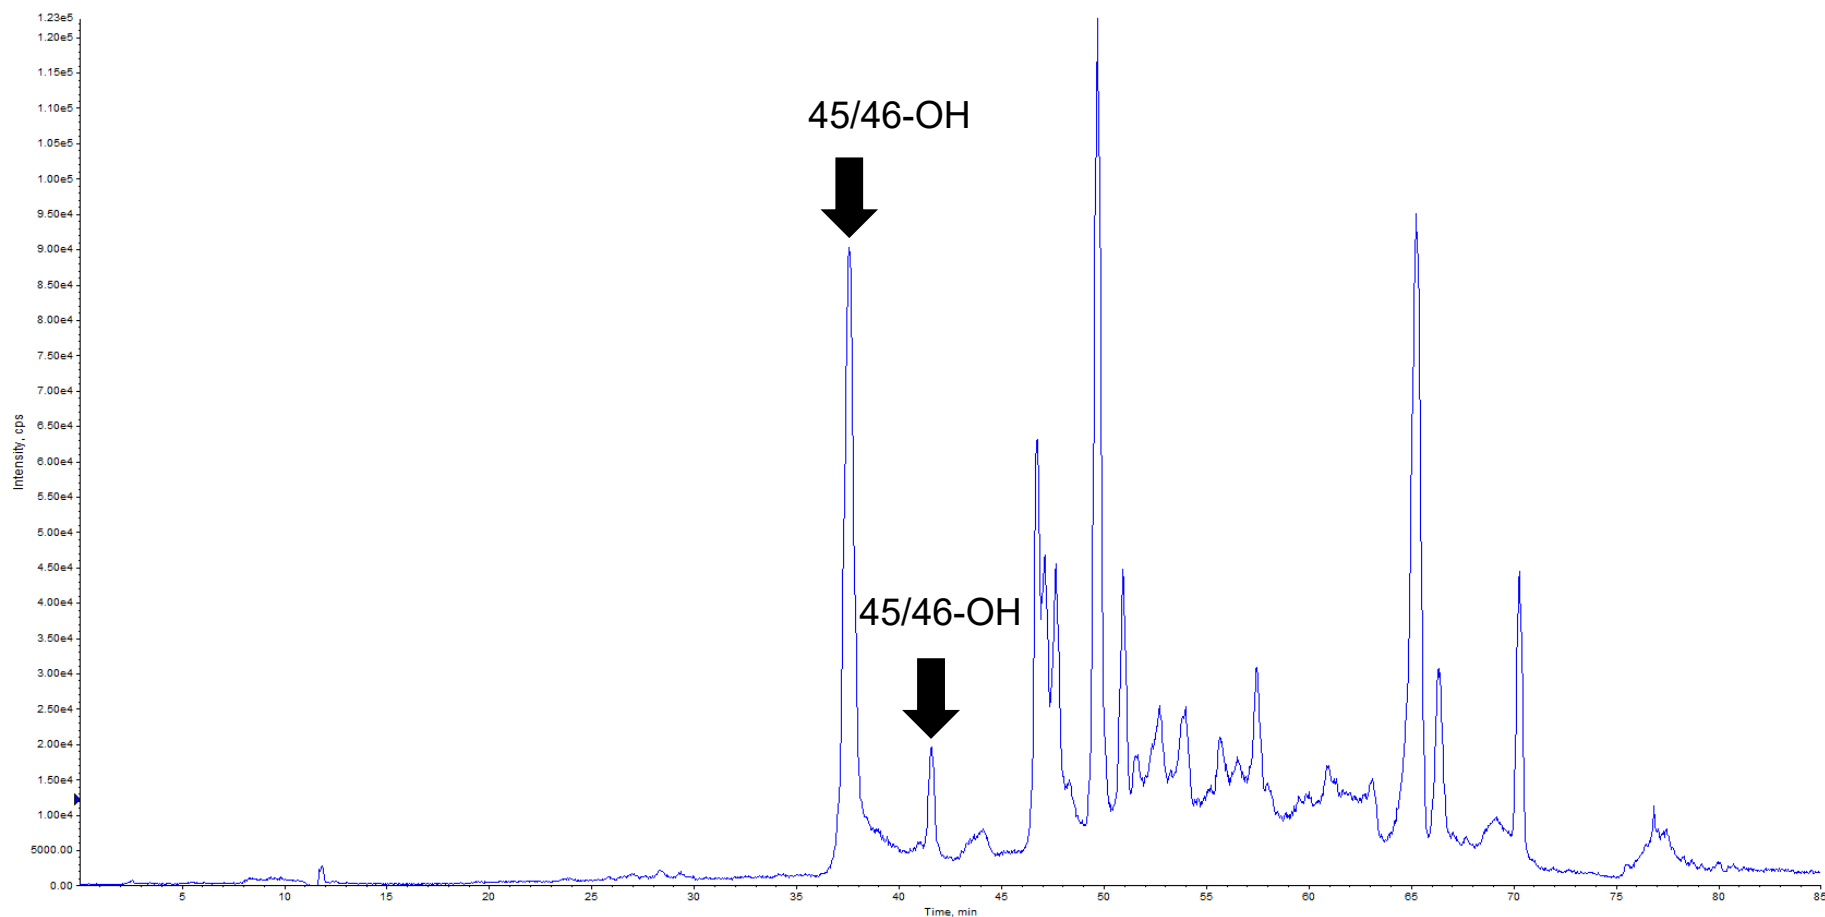

# MS spectrum of 45- and 46-Hydroxy Zotarolimus

CE = 75 eV, DP = 125 V

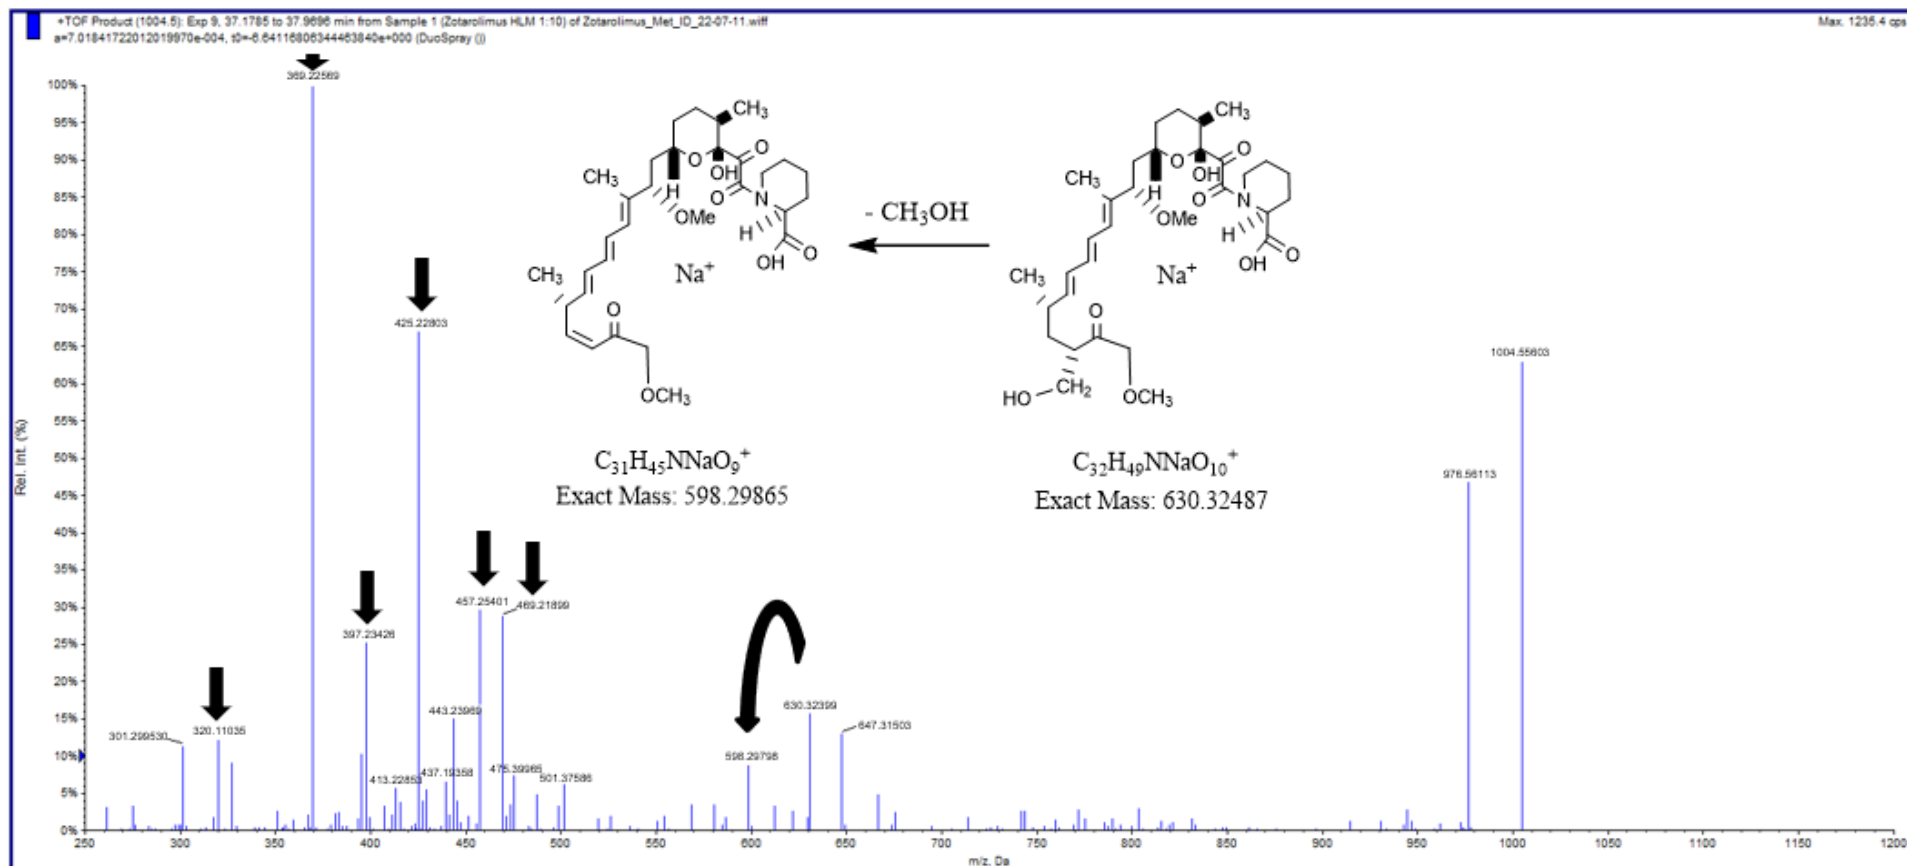



## $\Delta$ ppm of 45- and 46-OH Zotarolimus Fragments

---

| Fragment No. | Theoretical mass | Measured mass             | $\Delta$ ppm |
|--------------|------------------|---------------------------|--------------|
| 1            | 320.11046        | 320.11035                 | 0.3          |
| 2            | 369.2261         | 369.22569                 | 1.1          |
| 3            | 397.23493        | 397.23426                 | 1.7          |
| 4            | 413.22985        | 413.22853                 | 3.2          |
| 5            | 425.22985        | 425.22803                 | 4.3          |
| 6            | 443.24041        | 443.23969                 | 2.4          |
| 7            | 457.25606        | 457.25501                 | 2.3          |
| 8            | 469.21967        | 469.21899                 | 1.4          |
| 9            | 598.29865        | 598.29798                 | 1.1          |
| 10           | 630.32487        | 630.32399                 | 1.4          |
| 11           | 659.41429        | 659.41379 (low intensity) | 0.8          |
| 12           | 675.40921        | 675.40857 (low intensity) | 0.9          |
| 13           | 771.46672        | 771.46567 (low intensity) | 1.4          |
| 14           | 831.48785        | 831.48693 (low intensity) | 1.1          |
| 15           | 1004.55666       | 1004.55603                | 0.6          |

# 45-Hydroxy Zotarolimus Fragmentation Pattern

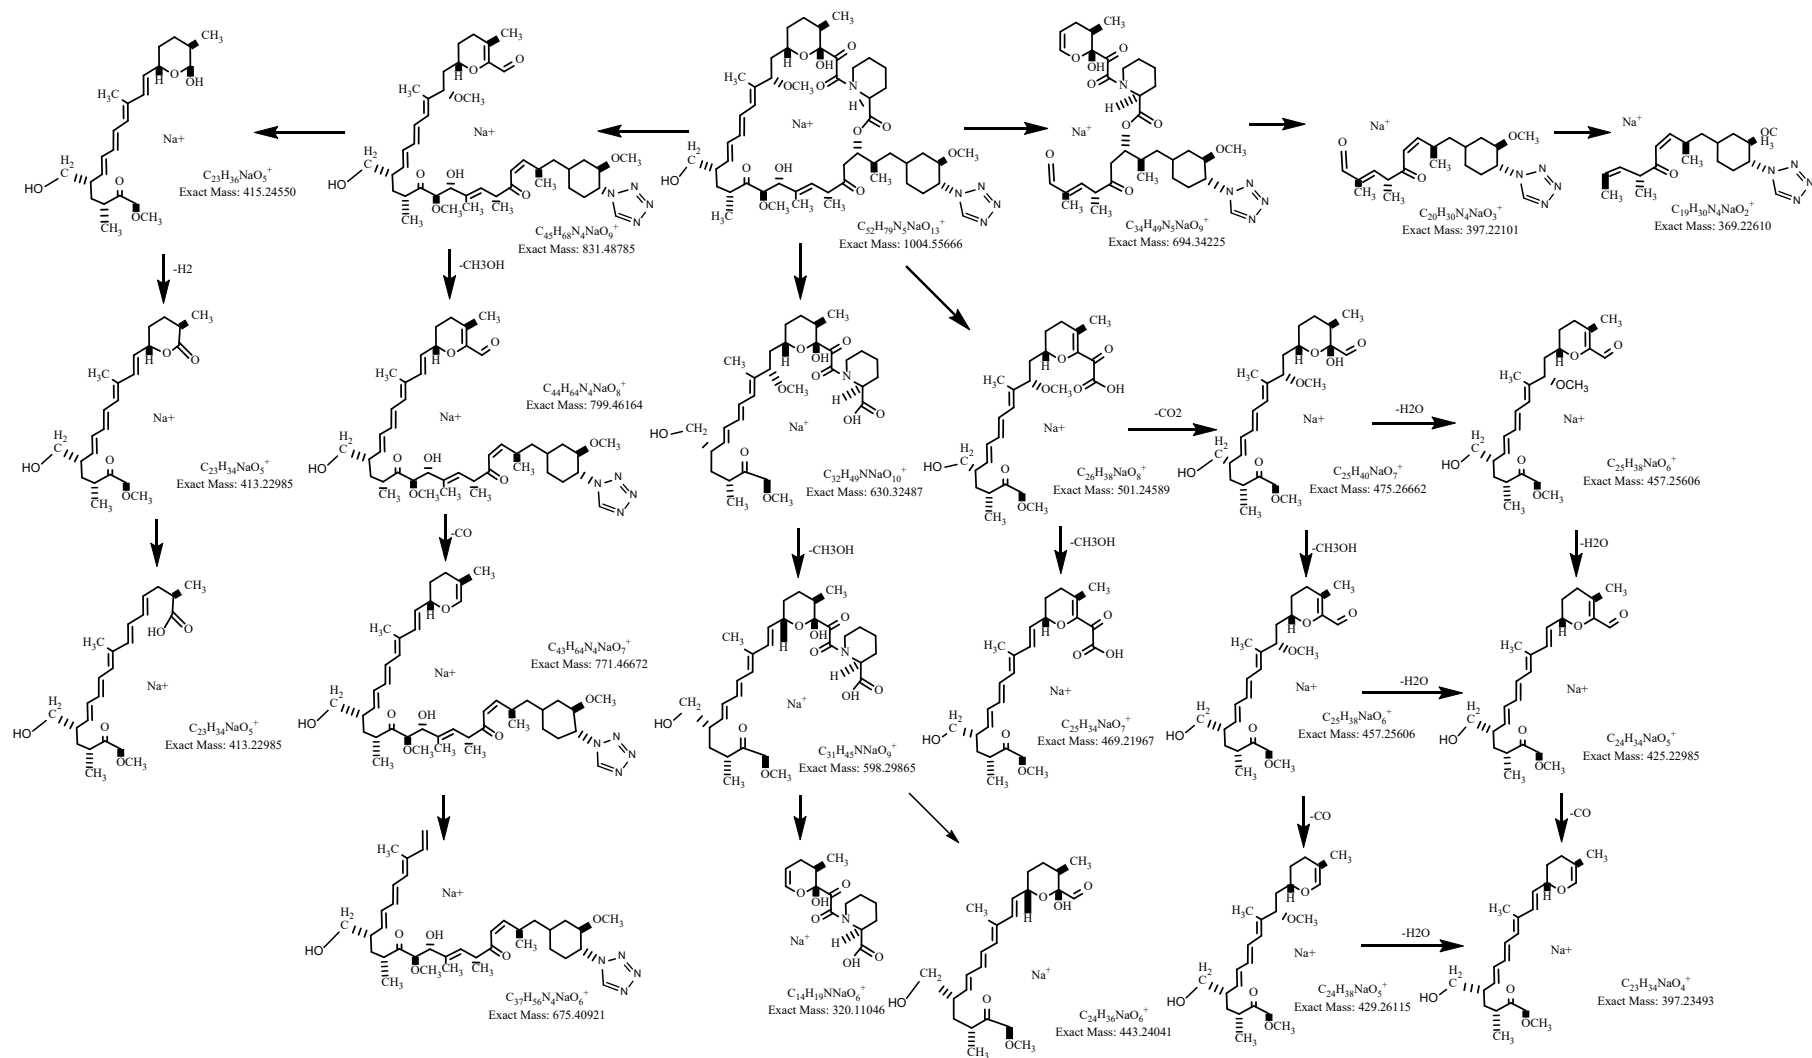

## 46-Hydroxy Zotarolimus Fragmentation Pattern

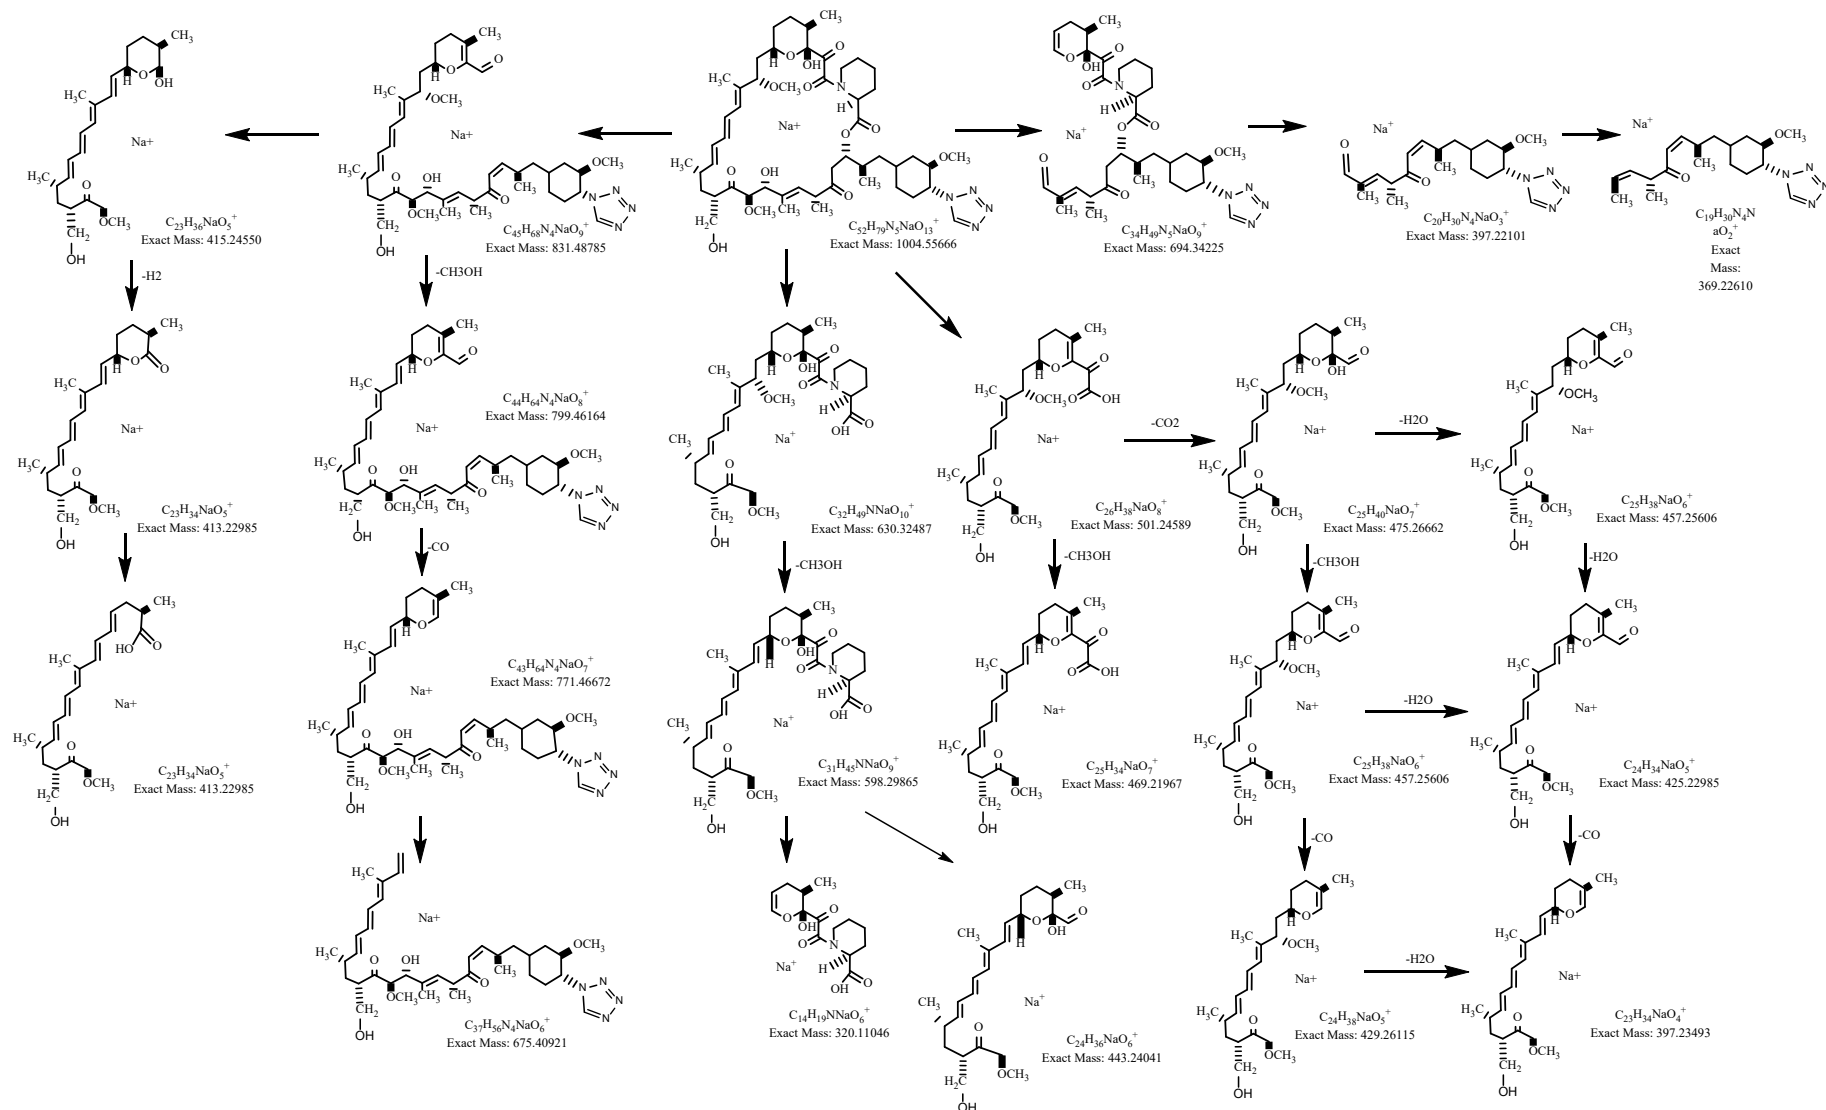

# 45/46-Hydroxy Zotarolimus Fragmentation Pattern (Methanol Loss)

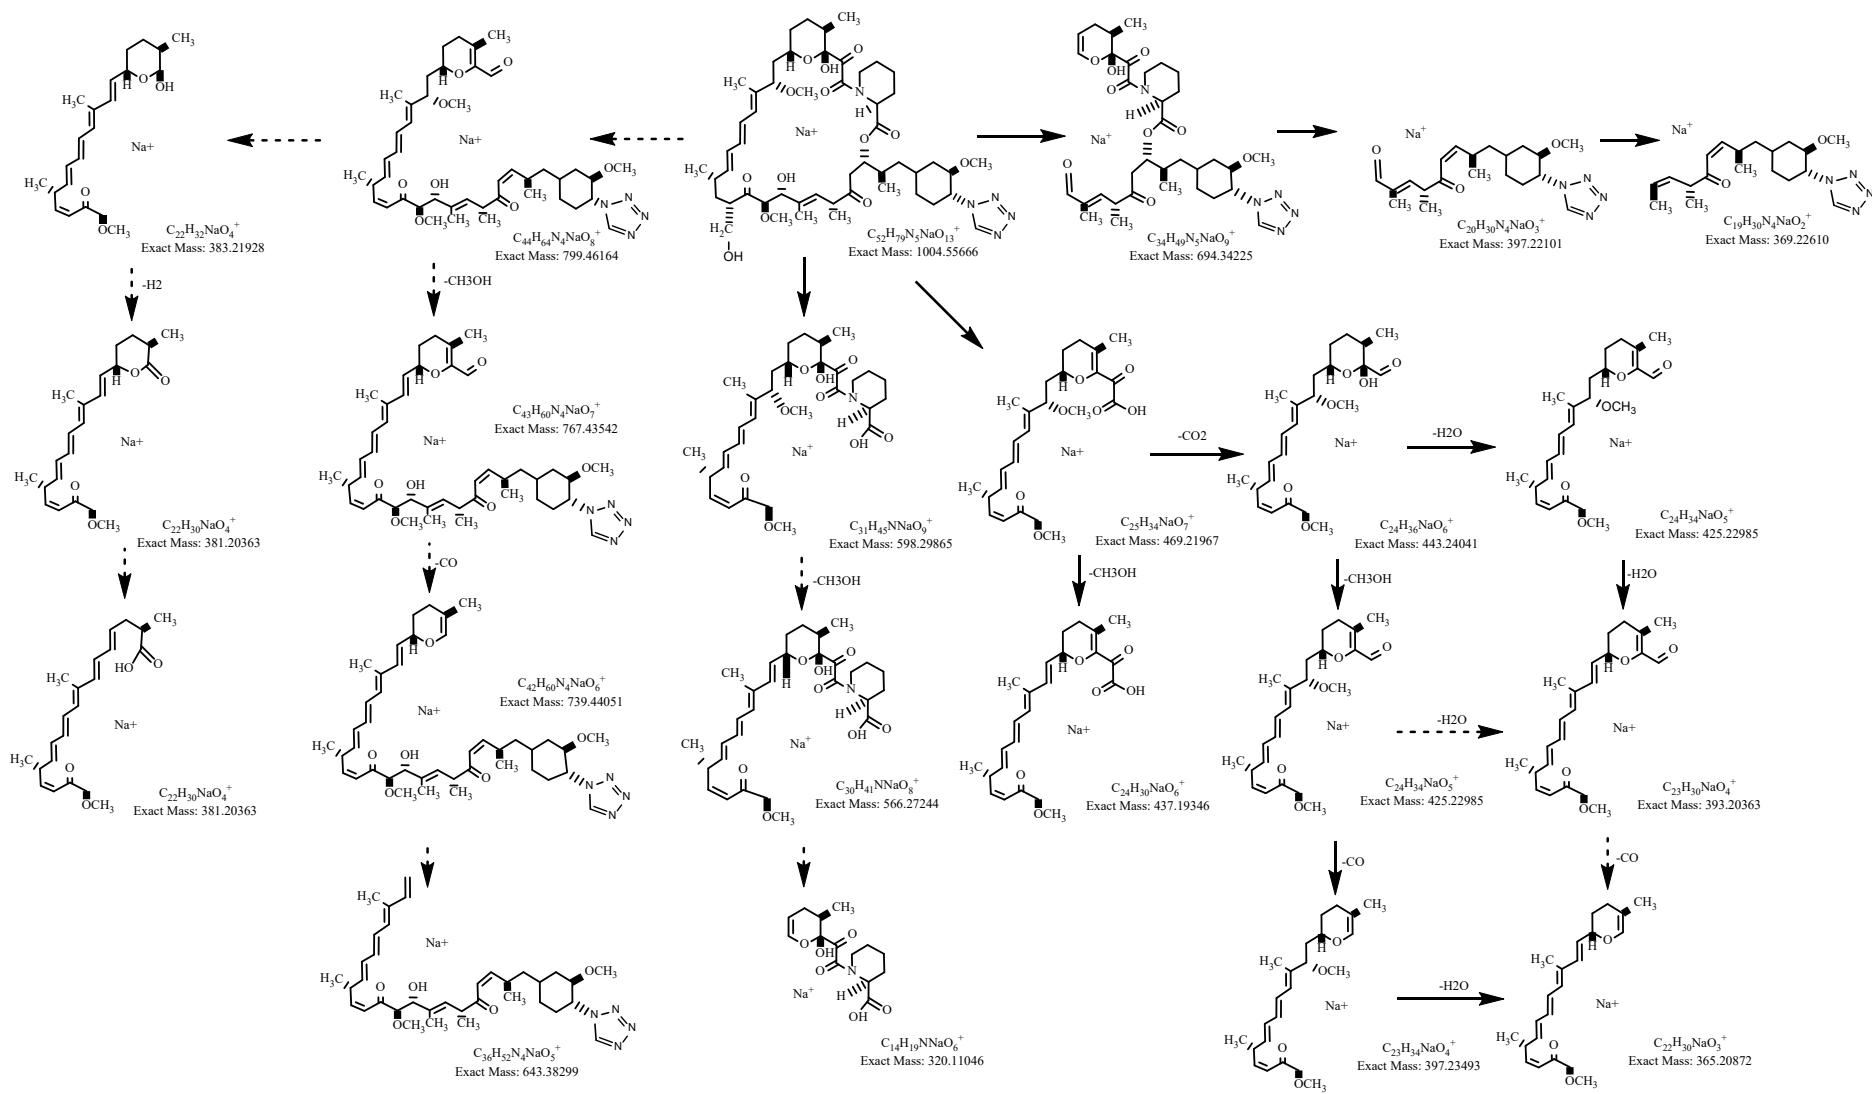

# Structural Assessment of 45- and 46-Hydroxy Zotarolimus by Comparison of Fragmentation Patterns with those of Zotarolimus

| Zotarolimus Fragments    | 45/46-Hydroxy Zotarolimus Fragments | Comments            |                                                                    |
|--------------------------|-------------------------------------|---------------------|--------------------------------------------------------------------|
| 320.11046                | 320.11046                           | no hydroxylation    | Rules out OH-piperidine, 11-, 12-, and 14-OH                       |
| 369.22610                | 369.22610                           | no hydroxylation    | Rules out 47-, 48-, or 49-OH                                       |
| 381.24002                | 397.24002                           | (+16) Hydroxylation | 11-, 12-, 14-, 23-, 24-, 25-, 45-, or 46-OH present                |
| 397.23493                | 413.23493                           | (+16) Hydroxylation | 11-, 12-, 14-, 23-, 24-, 25-, 45-, or 46-OH present                |
| 409.23493                | 425.23493                           | (+16) Hydroxylation | 11-, 12-, 14-, 23-, 24-, 25-, 45-, or 46-OH present                |
| 427.24550                | 443.24550                           | (+16) Hydroxylation | 11-, 12-, 14-, 23-, 24-, 25-, 45-, or 46-OH present                |
| 441.26115                | 457.26115                           | (+16) Hydroxylation | 11-, 12-, 14-, 23-, 24-, 25-, 45-, or 46-OH present                |
| 453.22476                | 469.22476                           | (+16) Hydroxylation | 11-, 12-, 14-, 23-, 24-, 25-, 45-, or 46-OH present                |
| 582.30374                | 598.30374                           | (+16) Hydroxylation | 11-, 12-, 14-, 23-, 24-, 25-, 45-, 46-, or piperidine-OH present   |
| 614.32995                | 630.32995                           | (+16) Hydroxylation | 11-, 12-, 14-, 23-, 24-, 25-, 45-, 46-, or piperidine-OH present   |
| 659.41429                | 675.41429                           | (+16) Hydroxylation | Rules out OH-piperidine, 11-, 12-, and 14-OH                       |
| 694.34225                | 694.34225                           | no hydroxylation    | Rules out OH-piperidine/ 11-, 12-, 14-, 47-, 48-, and 49-OH        |
| 783.46672                | 799.46672                           | (+16) Hydroxylation | 11-, 12-, 14-, 23-, 24-, 25-, 45-, 46-, 47-, 48-, or 49-OH present |
| 815.49294                | 831.49294                           | (+16) Hydroxylation | 11-, 12-, 14-, 23-, 24-, 25-, 45-, 46-, 47-, 48-, or 49-OH present |
| 988.56174                | 1004.56174                          | (+16) Hydroxylation |                                                                    |
| Characteristic Fragments |                                     |                     | $630 - 32 = 598$<br>$457 - 32 = 425$<br>$501 - 32 = 469$           |
| Determinant patterns     | methanol loss                       |                     | 45/46-OH favor the loss of Methanol in hydroxylated fragments      |

12-Hydroxy Zotarolimus,  $m/z = 1004.55666$

## 12-Hydroxy Zotarolimus, m/z = 1004.55666

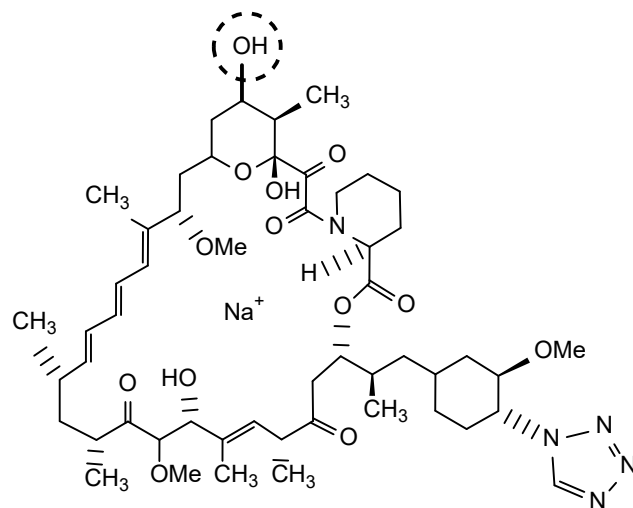

Chemical Formula: C<sub>52</sub>H<sub>79</sub>N<sub>5</sub>NaO<sub>13</sub><sup>+</sup>

Exact Mass: 1004.55666

12-hydroxy zotarolimus

# 12-Hydroxy Zotarolimus, $m/z = 1004.55666$ Extracted Ion Chromatogram (EIC)

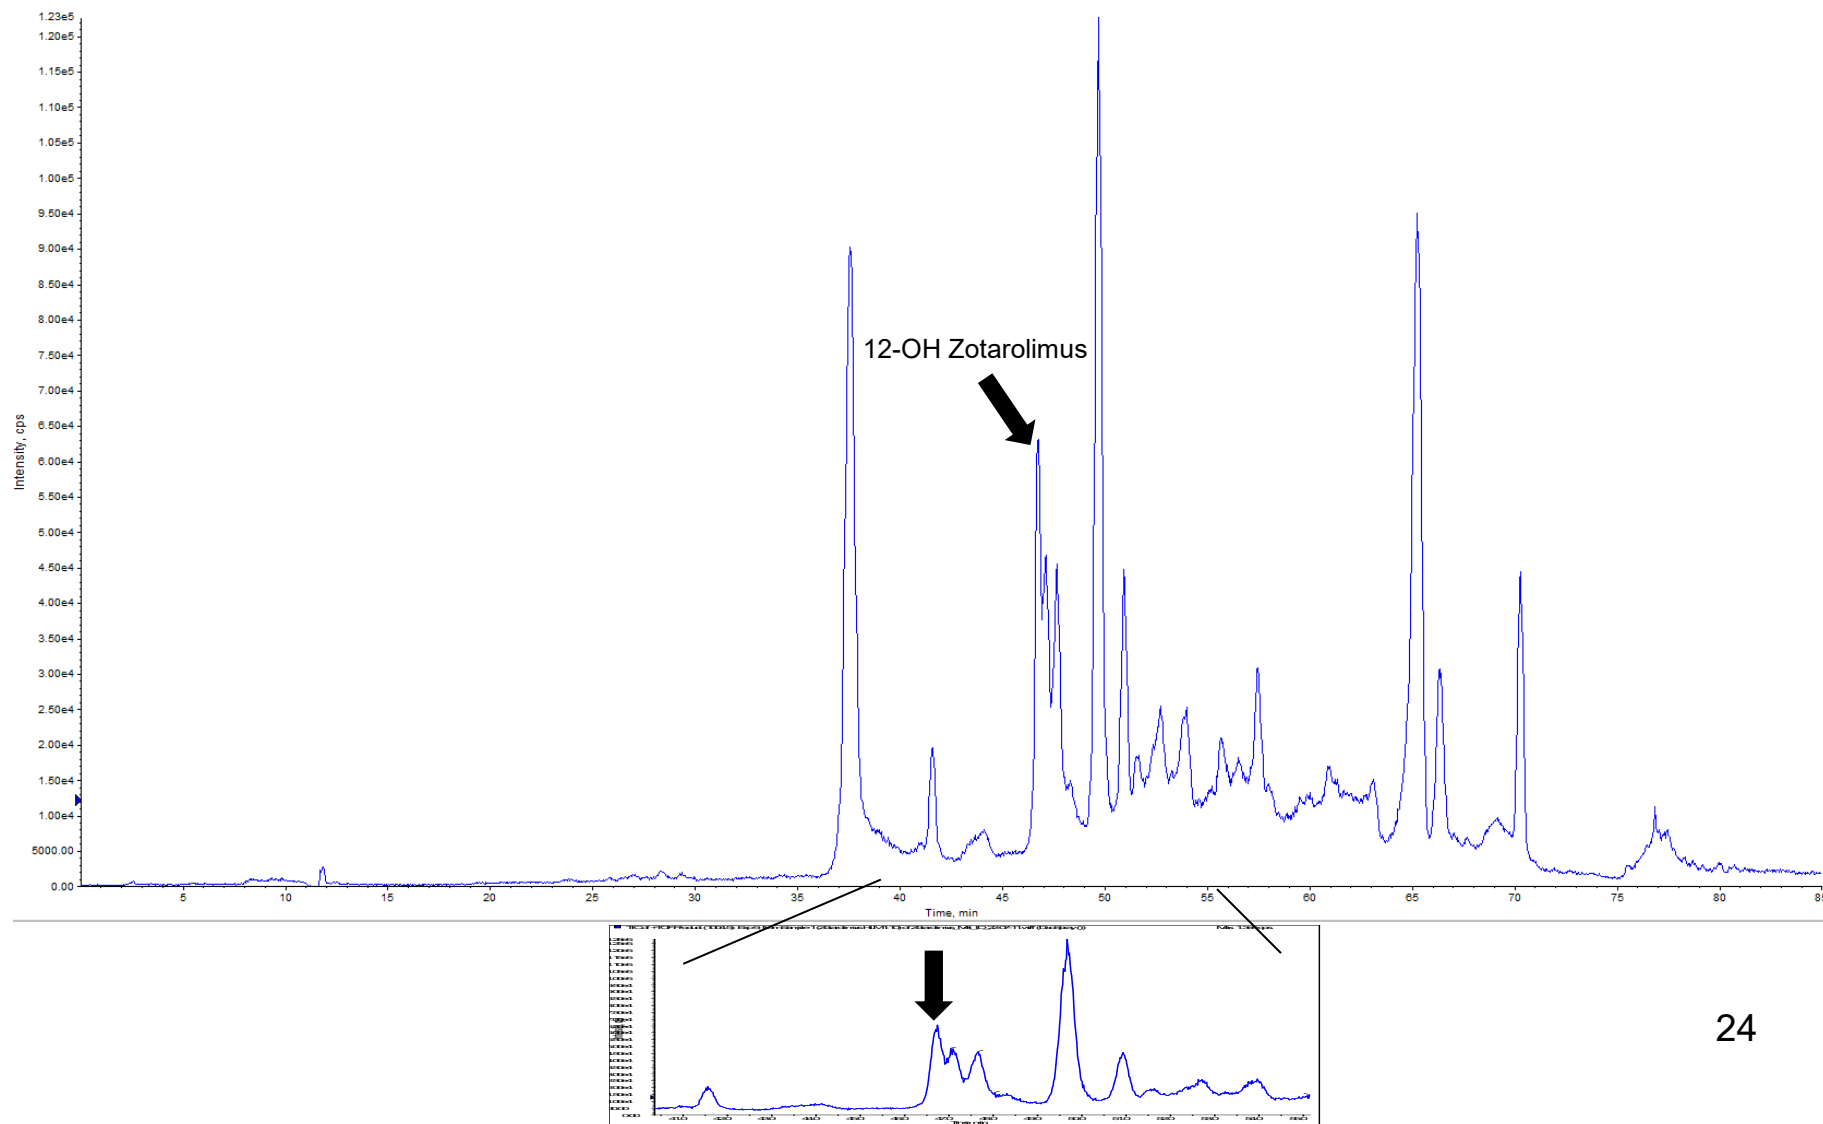



# Mass Spectrum of 12-Hydroxy Zotarolimus

CE = 75 eV, DP = 125 V

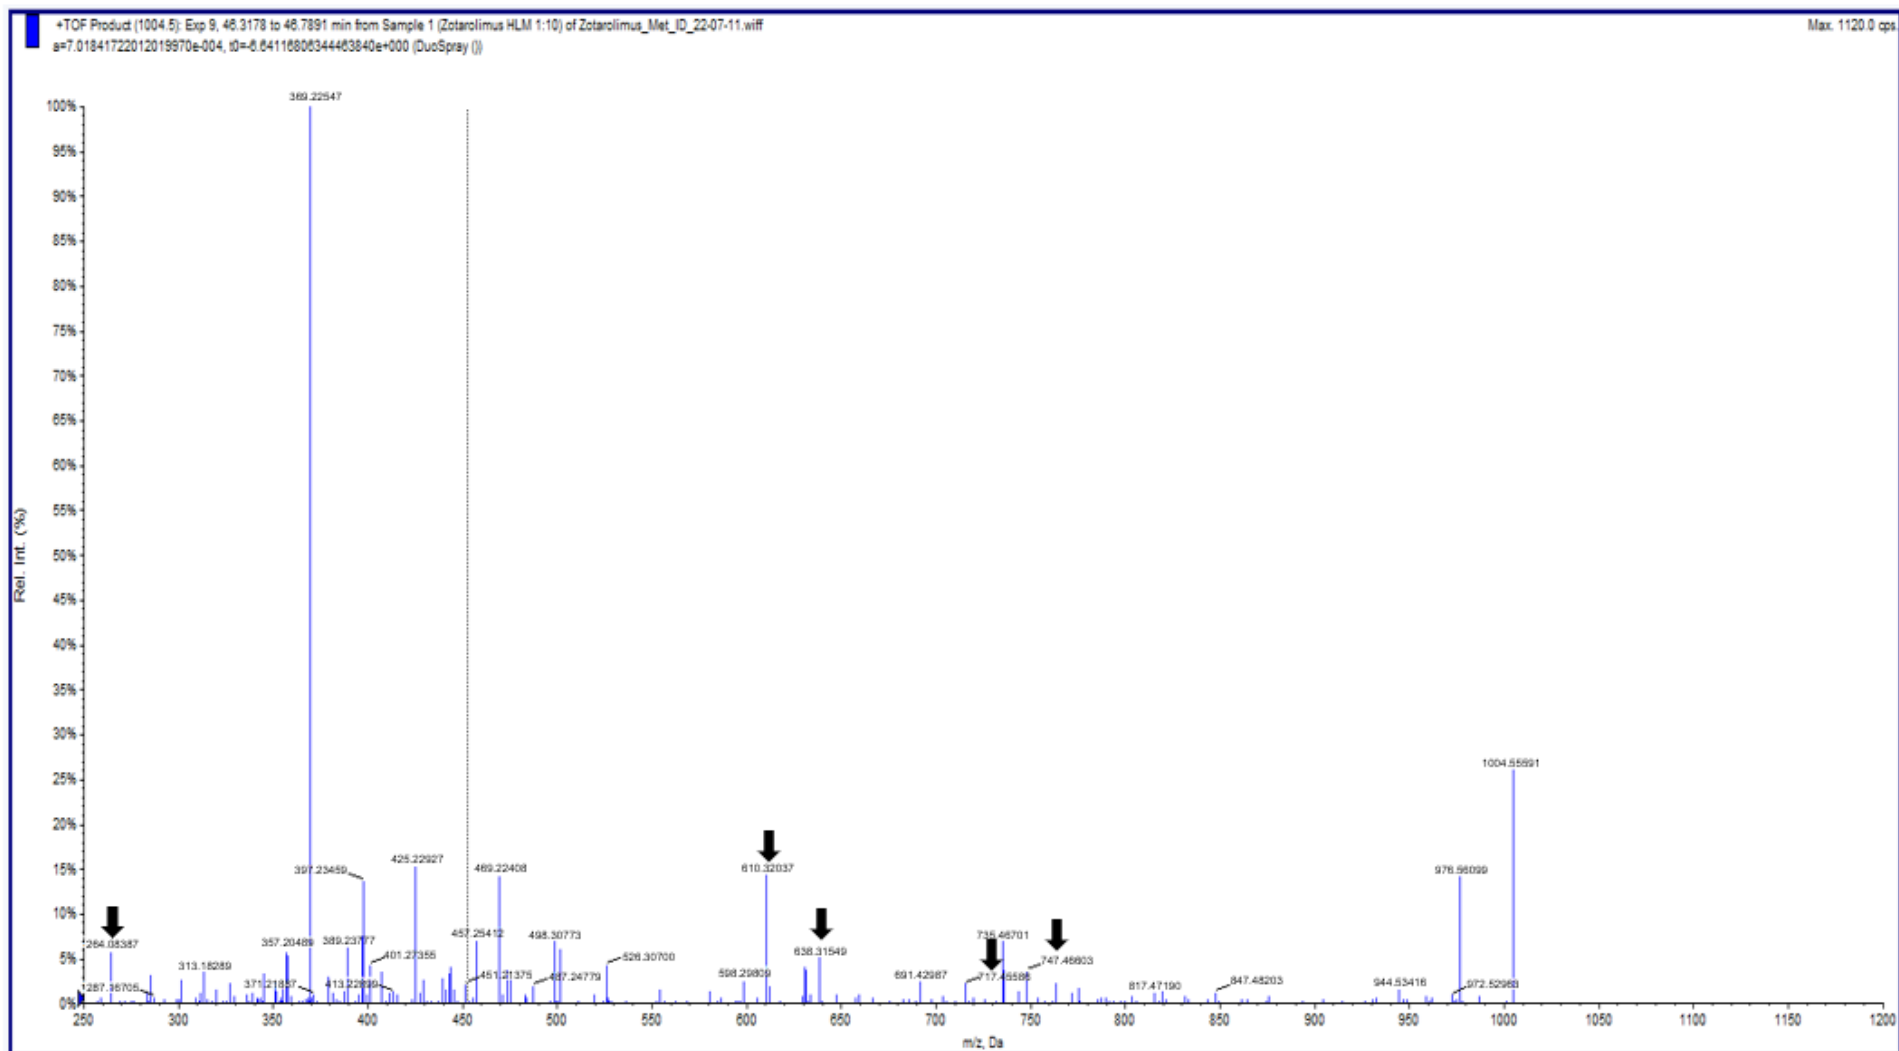

## Δppm of 12-Hydroxy Zotarolimus Fragments

| Fragment No. | Theoretical mass | Measured mass | Δppm |
|--------------|------------------|---------------|------|
| 1            | 264.08424        | 264.08387     | 1.4  |
| 2            | 369.22610        | 369.22547     | 1.7  |
| 3            | 397.23493        | 397.23459     | 0.9  |
| 4            | 413.22985        | 413.22899     | 2.1  |
| 5            | 425.22985        | 425.22927     | 1.4  |
| 6            | 443.24041        | 443.23992     | 1.1  |
| 7            | 469.22476        | 469.22408     | 1.4  |
| 8            | 598.29865        | 598.29809     | 0.9  |
| 9            | 675.40921        | 675.40887     | 0.5  |
| 10           | 817.4722         | 817.4719      | 0.4  |
| 11           | 847.48277        | 847.48203     | 0.9  |
| 12           | 1004.55666       | 1004.55591    | 0.7  |

Characteristic  
Fragments

| theoretical mass | measured mass | Δppm |
|------------------|---------------|------|
| 747.46672        | 747.46603     | 0.9  |
| 717.45616        | 717.45586     | 0.4  |
| 638.31603        | 638.31549     | 0.8  |
| 610.32112        | 610.32037     | 1.2  |
| 264.08424        | 264.08387     | 1.4  |

12-Hydroxy Zotarolimus,  $m/z = 1004.55666$ 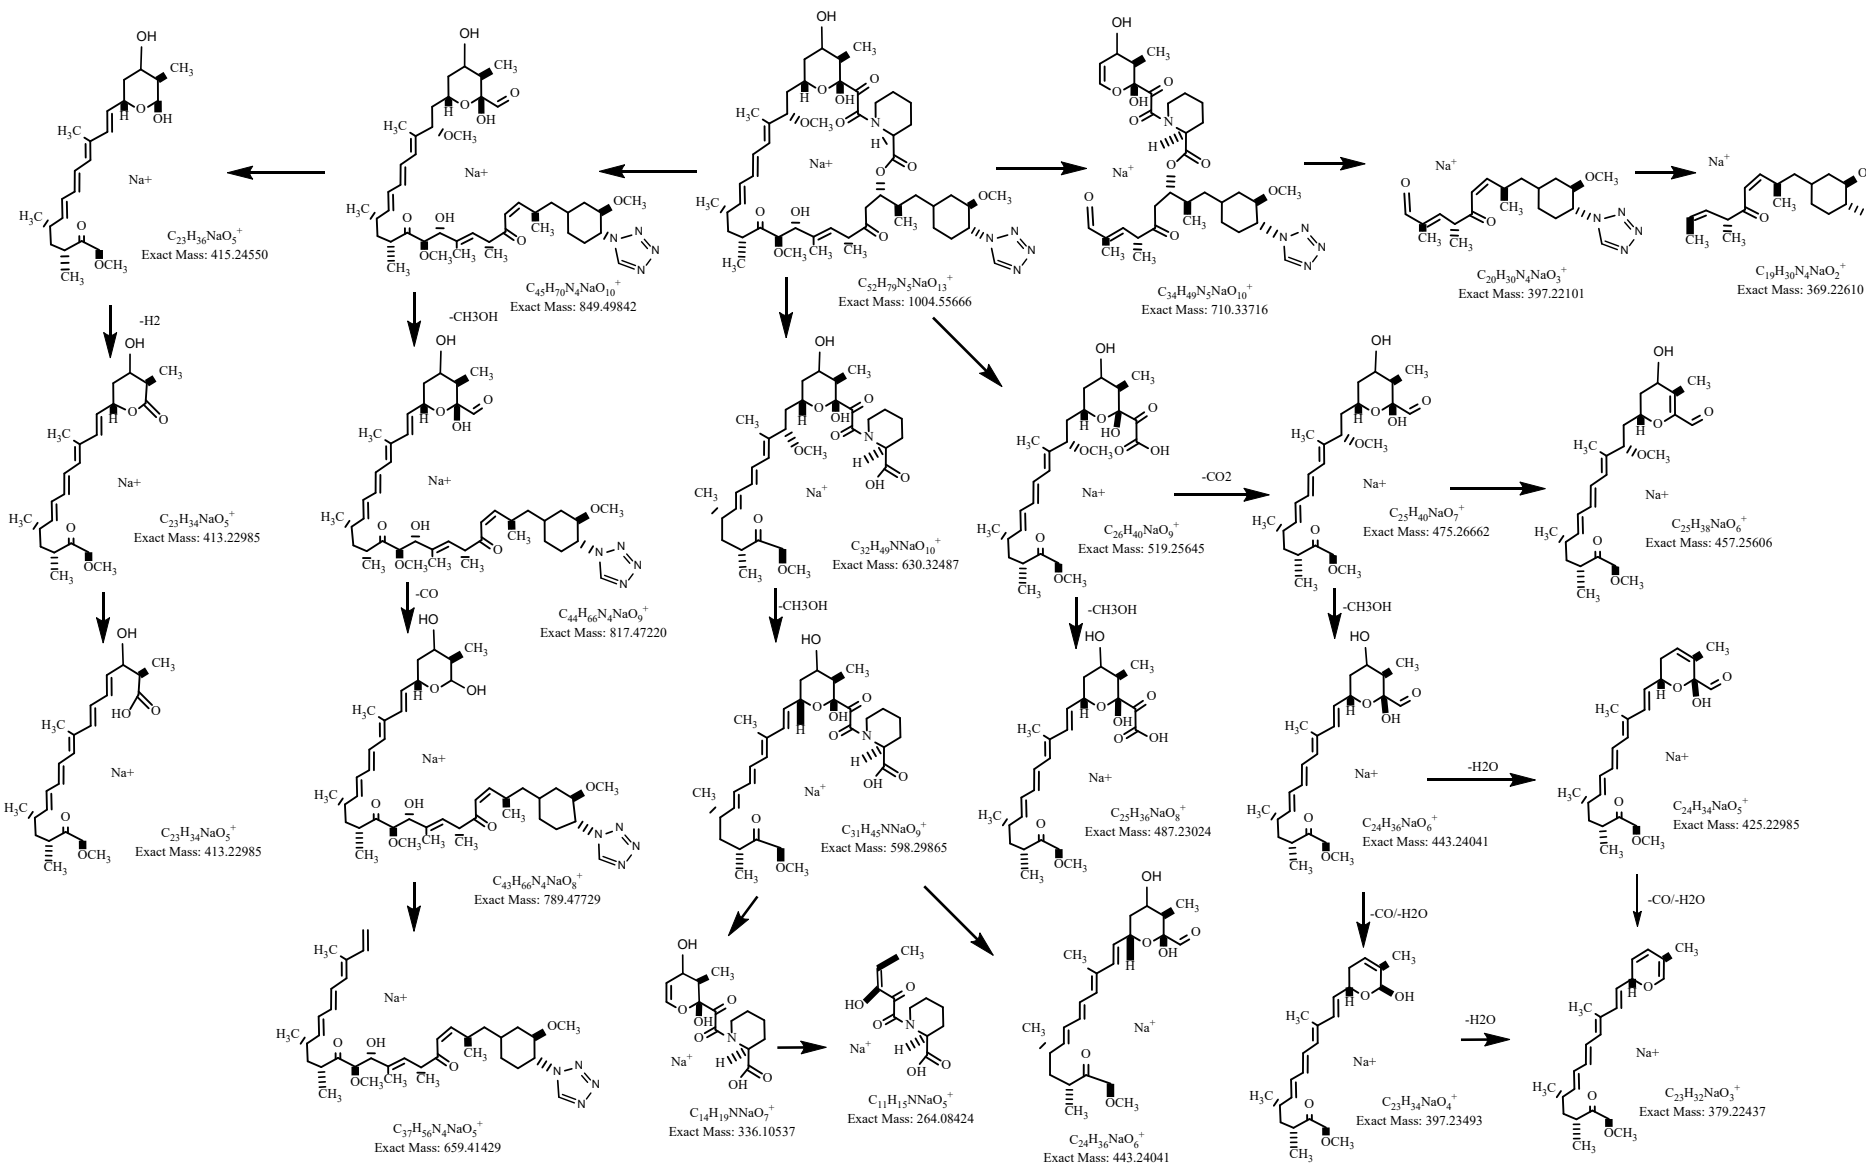

# 12-OH Zotarolimus, Characteristic Fragments

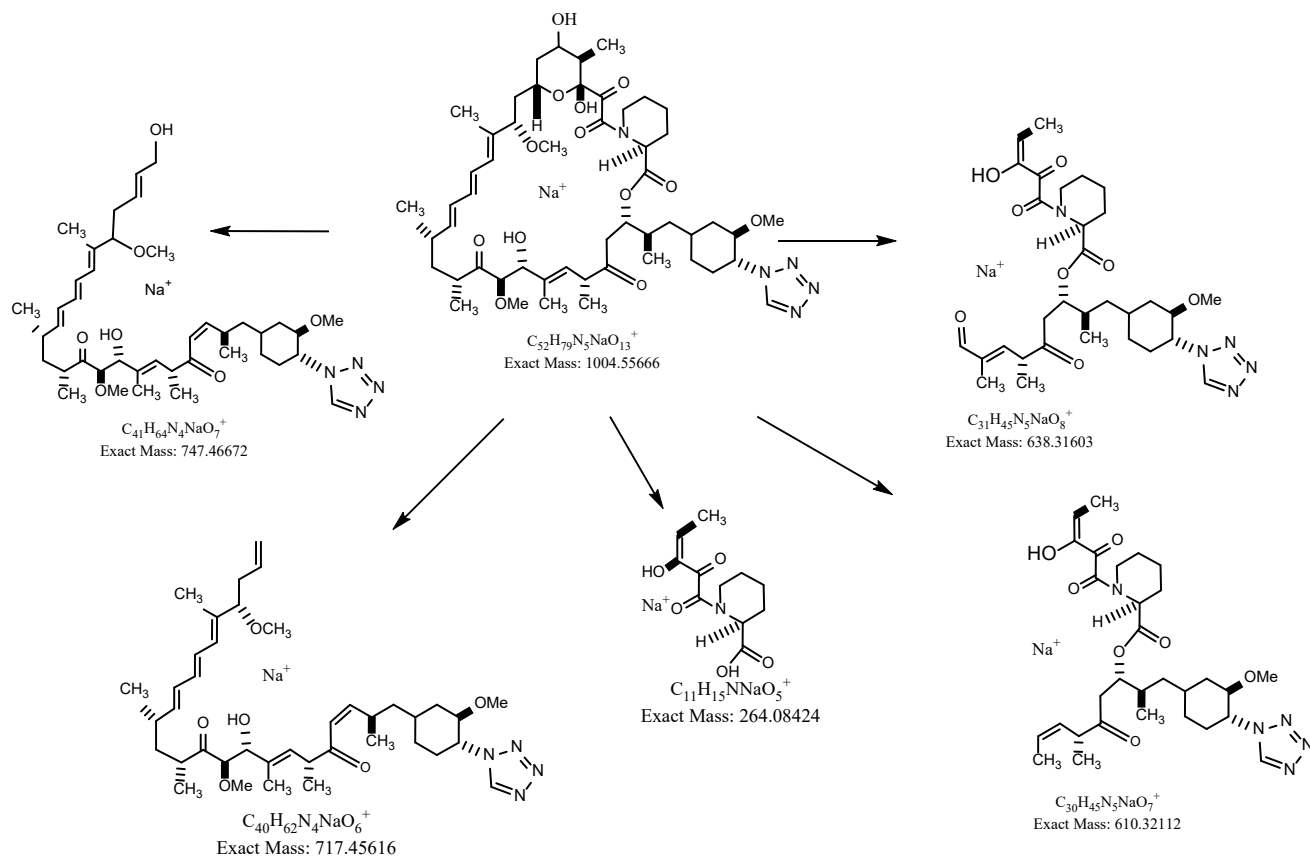

# Structural Assessment of 12-Hydroxy Zotarolimus by Comparison of Fragmentation Patterns with those of Zotarolimus

| Zotarolimus Fragments    | 12-Hydroxy Zotarolimus Fragments | Comments                         |                                                             |
|--------------------------|----------------------------------|----------------------------------|-------------------------------------------------------------|
| 320.11046                | 264.08387                        | Hydroxylation with rearrangement | 11, 12, and Piperidine-OH present                           |
| 369.22610                | 369.22547                        | no hydroxylation                 | Rules out 47, 48, and 49-OH                                 |
| 381.24002                | 397.23459                        | (+16) Hydroxylation              | 11, 12, 14, 23, 24, 25, 45, or 46-OH present                |
| 397.23493                | 413.22899                        | (+16) Hydroxylation              | 11, 12, 14, 23, 24, 25, 45, or 46-OH present                |
| 409.23493                | 425.22927                        | (+16) Hydroxylation              | 11, 12, 14, 23, 24, 25, 45, or 46-OH present                |
| 427.24550                | 443.23992                        | (+16) Hydroxylation              | 11, 12, 14, 23, 24, 25, 45, or 46-OH present                |
| 453.22476                | 469.22408                        | (+16) Hydroxylation              | 11, 12, 14, 23, 24, 25, 45, or 46-OH present                |
| 582.30374                | 598.29809                        | (+16) Hydroxylation              | 11, 12, 14, 23, 24, 25, 45, 46-OH, or piperidine-OH present |
| 614.32995                | 630.32403                        | (+16) Hydroxylation              | 11, 12, 14, 23, 24, 25, 45, 46-OH, or piperidine-OH present |
| 659.41429                | 659.41400                        | no hydroxylation                 | Rules out 23, 24, 45, 46, 47, 48, and 49-OH                 |
| 783.46672                | 799.46089                        | (+16) Hydroxylation              | Rules out OH-piperidine                                     |
| 831.48785                | 847.48203                        | (+16) Hydroxylation              | Rules out OH-piperidine                                     |
| 988.56174                | 1004.55591                       | (+16) Hydroxylation              |                                                             |
| Characteristic Fragments |                                  |                                  | 264, 610, 638, 717, and 747                                 |
| Determinant patterns     |                                  |                                  |                                                             |

24-Hydroxy Zotarolimus,  $m/z = 1004.55666$

## 24-Hydroxy Zotarolimus, m/z = 1004.55666

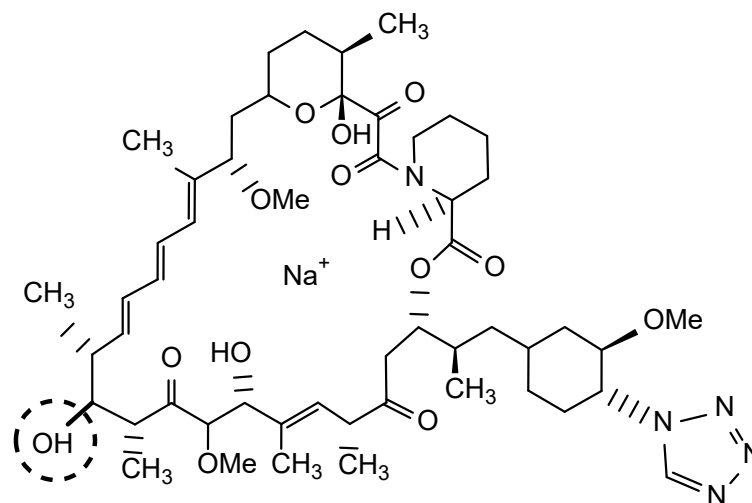

Chemical Formula:  $C_{52}H_{79}N_5NaO_{13}^{+}$

Exact Mass: 1004.55666

24-hydroxy zotarolimus

# 24-Hydroxy Zotarolimus, $m/z = 1004.55666$ Extracted Ion Chromatogram (EIC)

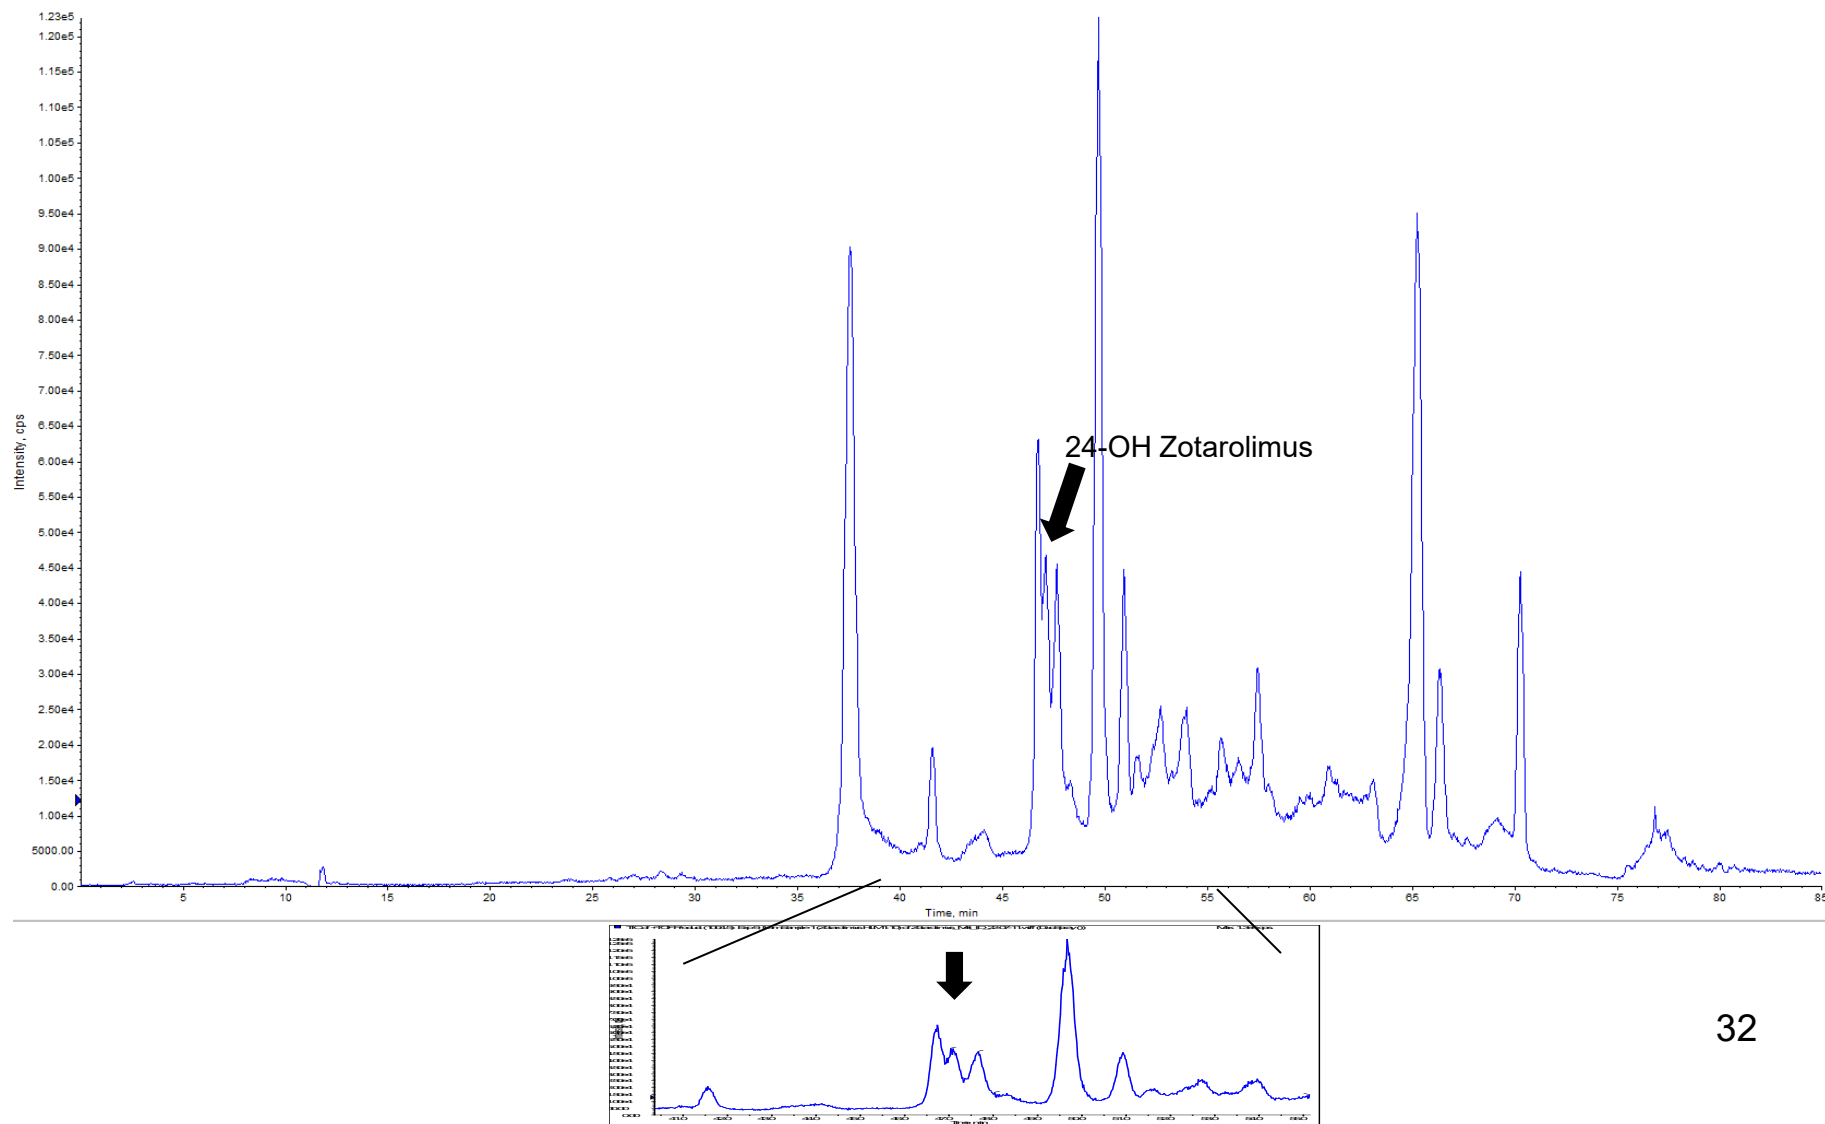



# Mass Spectrum of 24-Hydroxy Zotarolimus

CE = 75 eV, DP = 125 V

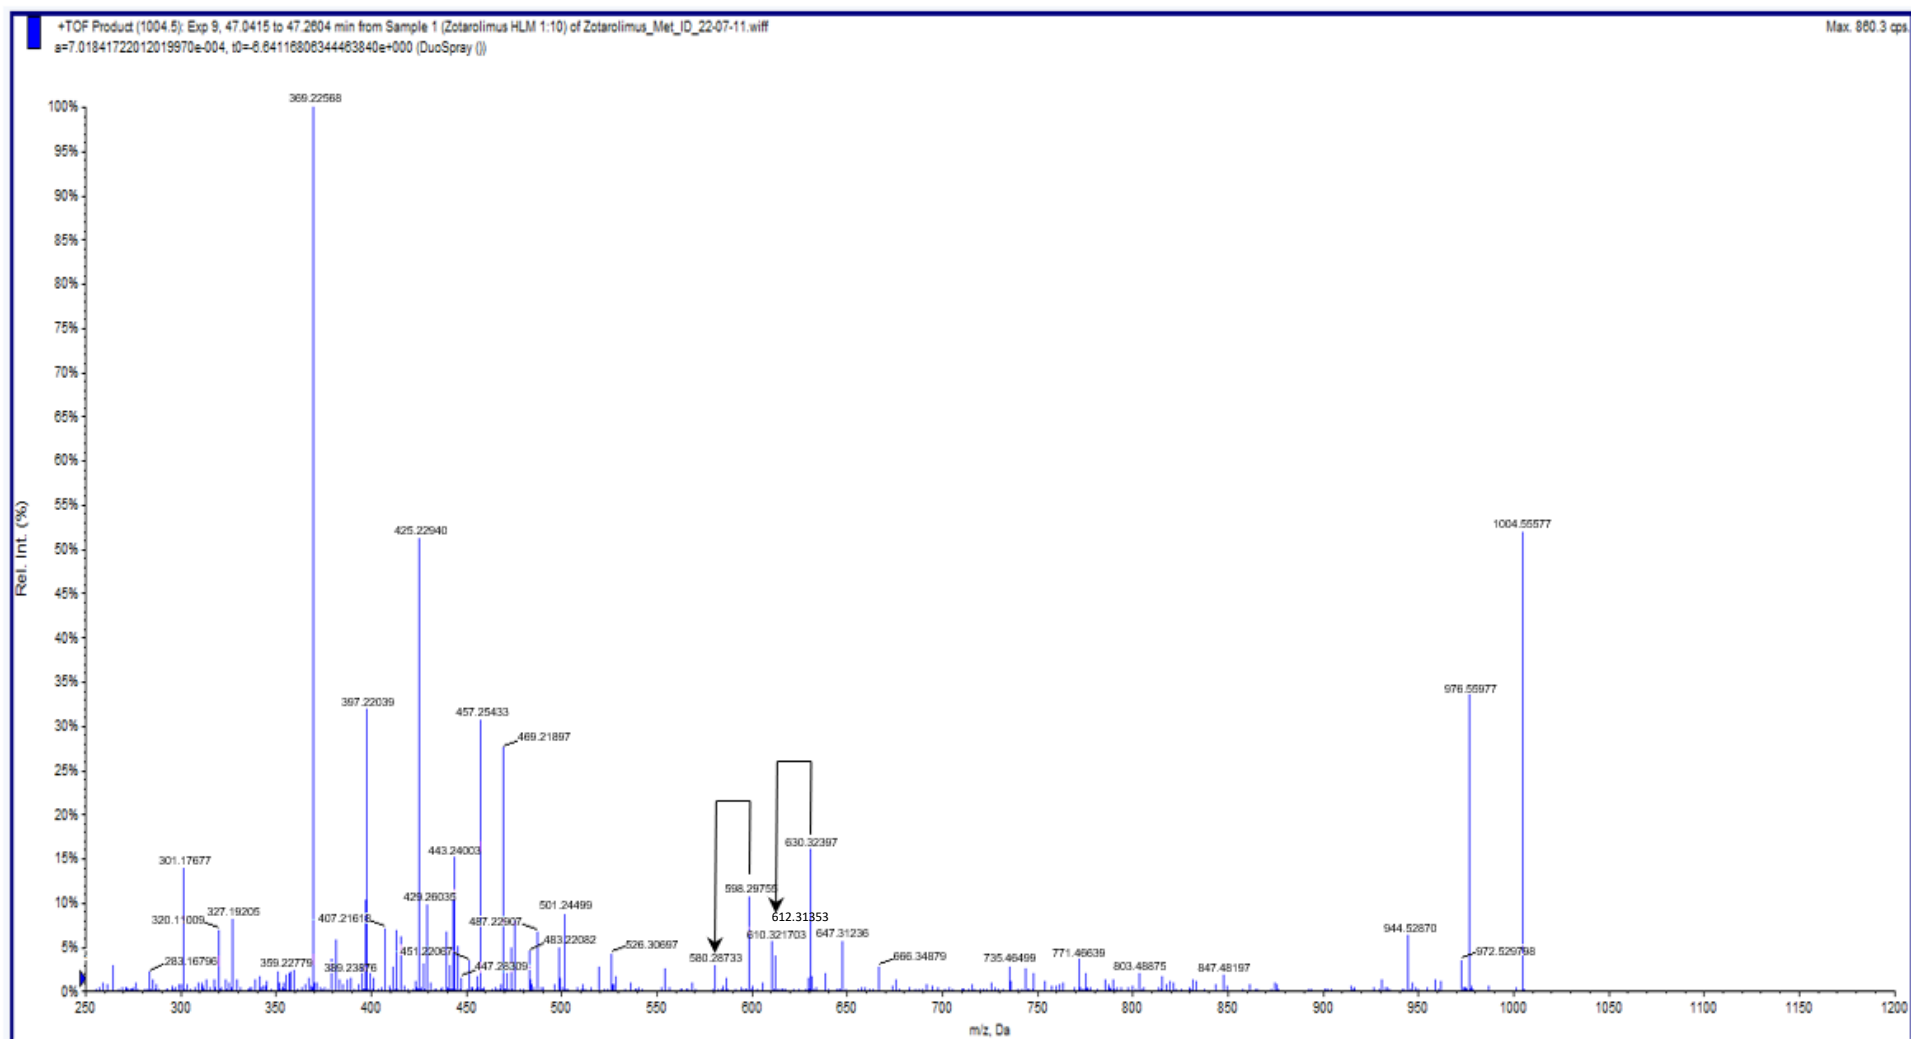

# Δppm of 24-Hydroxy Zotarolimus Fragments

| Fragment No. | Theoretical mass | Measured mass             | Δppm |
|--------------|------------------|---------------------------|------|
| 1            | 320.11046        | 320.11009                 | 1.2  |
| 2            | 369.22610        | 369.22568                 | 1.1  |
| 3            | 397.22101        | 397.22039                 | 1.6  |
| 4            | 429.26115        | 429.26035                 | 1.9  |
| 5            | 425.22985        | 425.22940                 | 1.1  |
| 6            | 443.24041        | 443.24003                 | 0.9  |
| 7            | 457.25606        | 457.25563                 | 0.9  |
| 8            | 469.21967        | 469.21897                 | 1.5  |
| 9            | 501.24589        | 501.24499                 | 1.8  |
| 10           | 598.29865        | 598.29755                 | 1.8  |
| 11           | 630.32487        | 630.32397                 | 1.4  |
| 12           | 647.37791        | 647.37703                 | 1.4  |
| 13           | 771.46672        | 771.46639                 | 0.4  |
| 14           | 817.4722         | 817.4719 (low intensity)  | 0.4  |
| 15           | 831.48785        | 831.48709 (low intensity) | 0.9  |
| 16           | 1004.55666       | 1004.55577                | 0.9  |

| Characteristic<br>Fragments | { | Theoretical mass | Measured mass | Δppm |
|-----------------------------|---|------------------|---------------|------|
|                             |   | 612.31430        | 612.31353     | 1.3  |
|                             |   | 580.28809        | 580.28733     | 1.3  |
|                             |   | 327.19307        | 327.19205     | 3.1  |
|                             |   | 301.17742        | 301.17677     | 2.2  |

# 24-Hydroxy Zotarolimus, m/z = 1004.55666

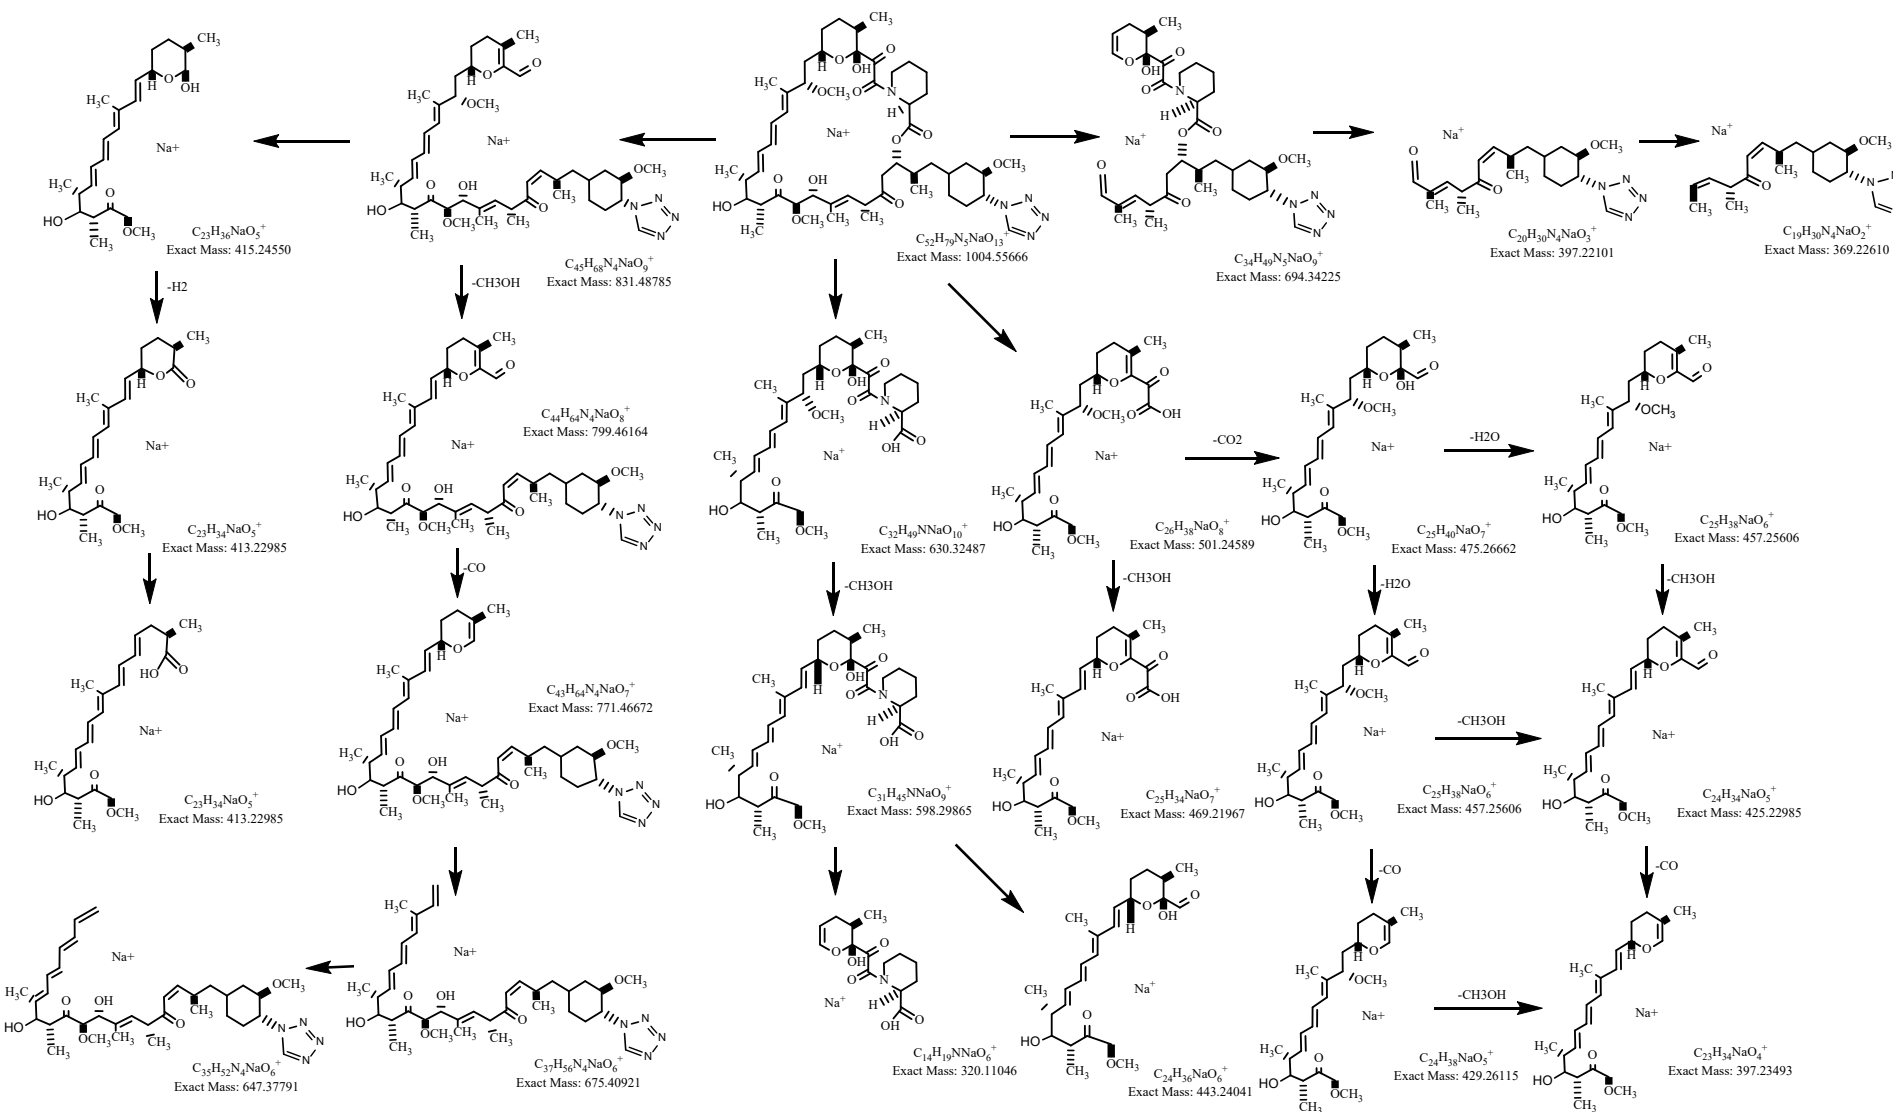

# Characteristic Fragments of 24-OH Zotarolimus

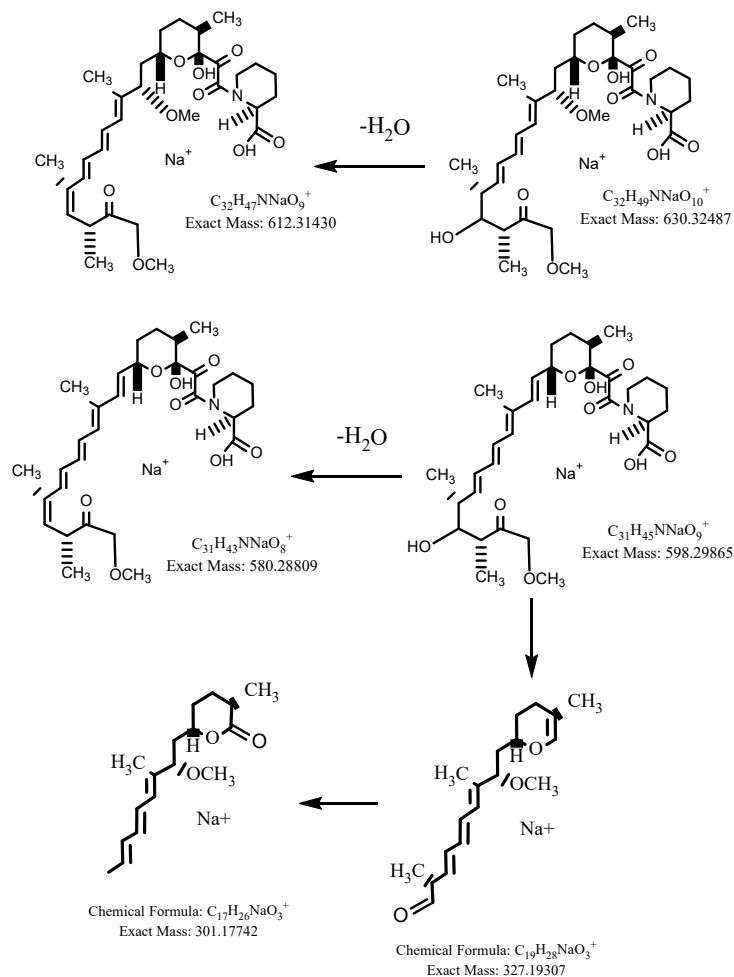

# Structural Assessment of 24-Hydroxy Zotarolimus by Comparison of Fragmentation Patterns with those of Zotarolimus

| Zotarolimus Fragments    | 24-Hydroxy Zotarolimus Fragments | Comments            |                                                                                                                                                                  |
|--------------------------|----------------------------------|---------------------|------------------------------------------------------------------------------------------------------------------------------------------------------------------|
| 320.11046                | 320.11009                        | no hydroxylation    | Rules out 11, 12, and Piperidine-OH                                                                                                                              |
| 369.22610                | 369.22568                        | no hydroxylation    | Rules out 47, 48, and -OH                                                                                                                                        |
| 381.24002                | 397.22039                        | (+16) Hydroxylation | 11, 12, 14, 23, 24, 25, 45, or 46-OH present                                                                                                                     |
| 397.23493                | 413.22934                        | (+16) Hydroxylation | 11, 12, 14, 23, 24, 25, 45, or 46-OH present                                                                                                                     |
| 409.23493                | 425.22940                        | (+16) Hydroxylation | 11, 12, 14, 23, 24, 25, 45, or 46-OH present                                                                                                                     |
| 427.24550                | 443.24003                        | (+16) Hydroxylation | 11, 12, 14, 23, 24, 25, 45, or 46-OH present                                                                                                                     |
| 413.26623                | 429.26035                        | (+16) Hydroxylation | 11, 12, 14, 23, 24, 25, 45, or 46-OH present                                                                                                                     |
| 453.22476                | 469.21897                        | (+16) Hydroxylation | 11, 12, 14, 23, 24, 25, 45, or 46-OH present                                                                                                                     |
| 582.30374                | 598.29755                        | (+16) Hydroxylation | 11, 12, 14, 23, 24, 25, 45, 46-OH, or piperidine-OH present                                                                                                      |
| 614.32995                | 630.32397                        | (+16) Hydroxylation | 11, 12, 14, 23, 24, 25, 45, 46-OH, or piperidine-OH present                                                                                                      |
| 659.41429                | 675.40832                        | (+16) Hydroxylation | Rules out 11, 12, and Piperidine-OH                                                                                                                              |
| 755.47181                | 771.46639                        | (+16) Hydroxylation | Rules out OH-piperidine                                                                                                                                          |
| 988.56174                | 1004.55577                       | (+16) Hydroxylation |                                                                                                                                                                  |
| Characteristic Fragments |                                  |                     | 301, 327, 580, 612                                                                                                                                               |
| Determinant patterns     |                                  |                     | Characteristic fragment for water loss ( $630 - 18 = 612$ m/z) of 23 and 24-OH<br>Characteristic fragment for water loss ( $598 - 18 = 580$ m/z) of 23 and 24-OH |

11-Hydroxy Zotarolimus,  $m/z = 1004.55666$

# 11-Hydroxy Zotarolimus, m/z = 1004.55666

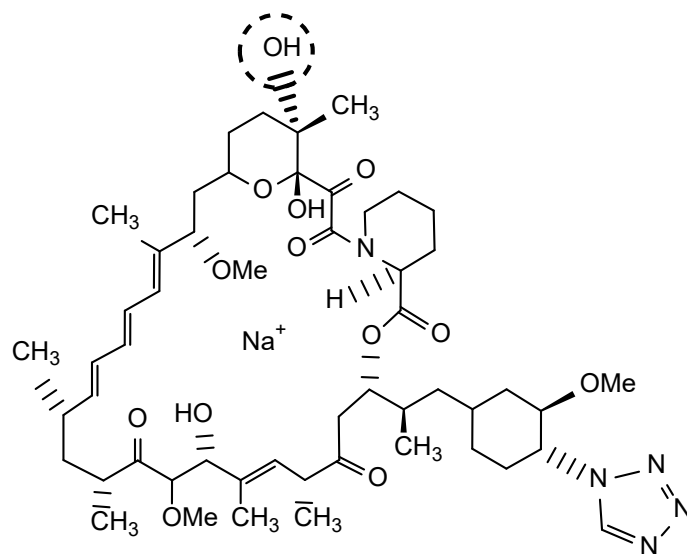

Chemical Formula:  $C_{52}H_{79}N_5NaO_{13}^+$

Exact Mass: 1004.55666

11-hydroxy zotarolimus

# 11-Hydroxy Zotarolimus, $m/z = 1004.55666$ Extracted Ion Chromatogram (EIC)

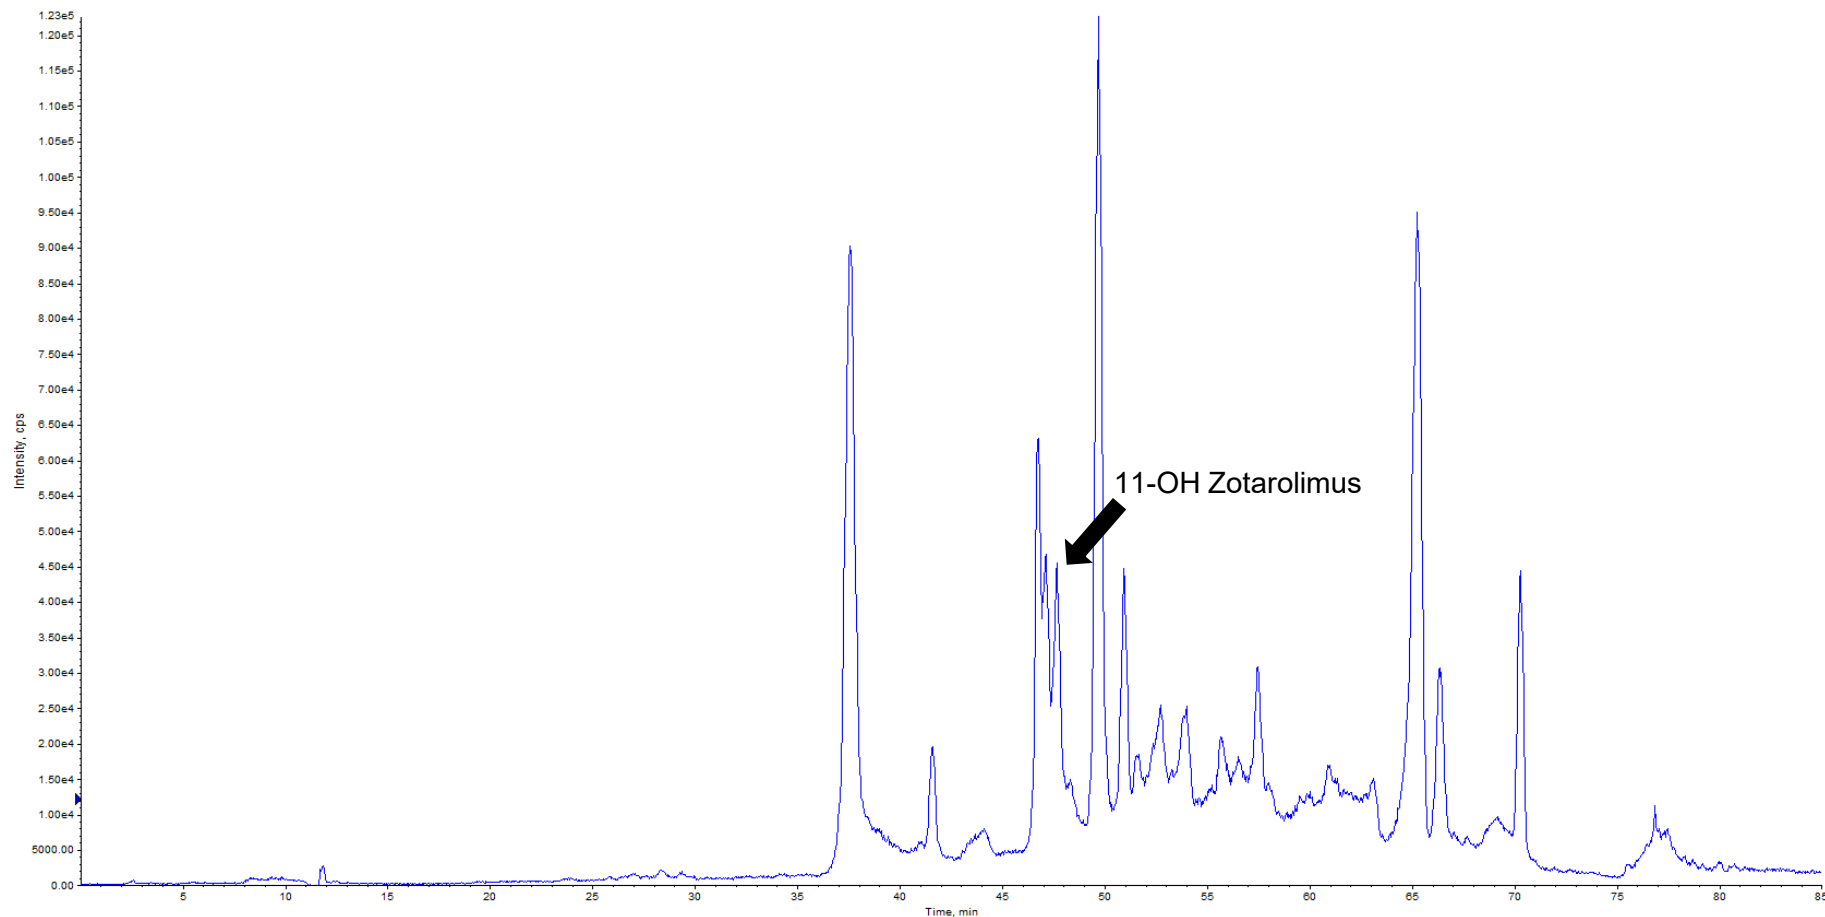



# Mass Spectrum of 11-Hydroxy Zotarolimus

CE = 75 eV, DP = 125 V

+TOF Product (1004.5): Exp 9, 47.5128 to 47.9168 min from Sample 1 (Zotarolimus HLM 1:10) of Zotarolimus\_Met\_ID\_22-07-11.wiff  
a=7.01841722012019970e-004, t0=-8.64116806344463840e+000 (DuoSpray (I))

Max. 980.7 cps

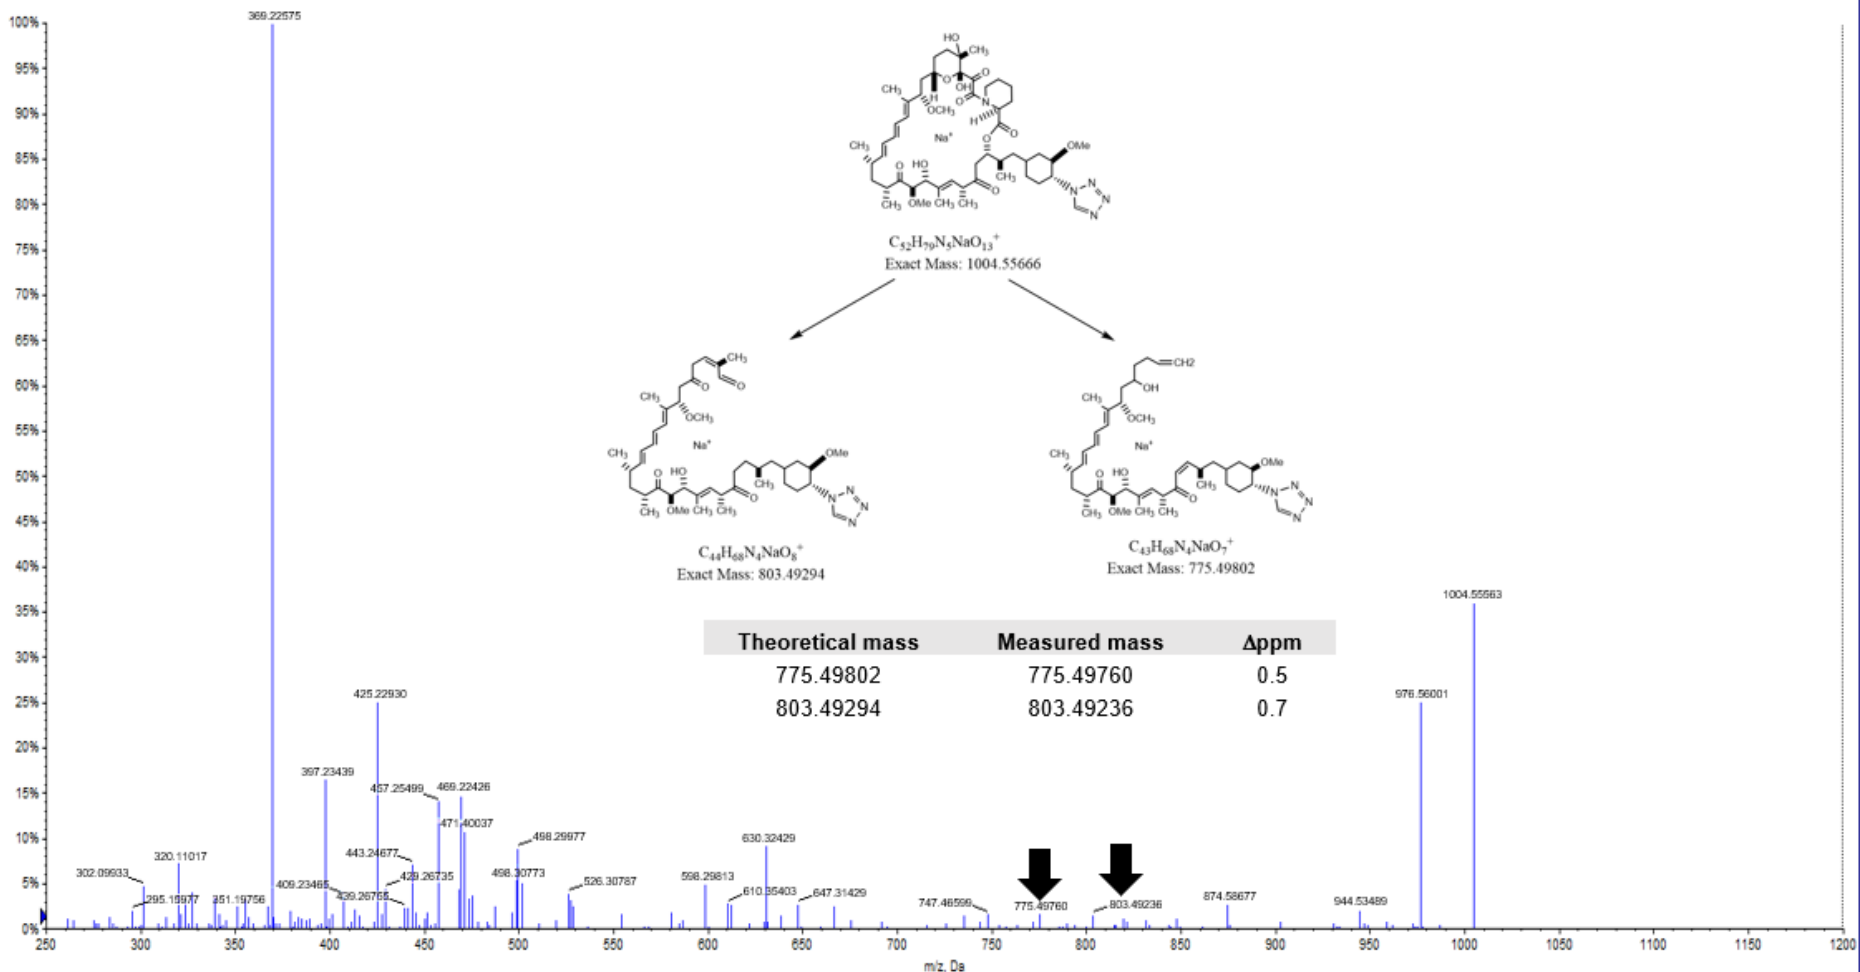

## Δppm of 11-Hydroxy Zotarolimus Fragments

| Fragment No. | theoretical mass | measured mass | Δppm |
|--------------|------------------|---------------|------|
| 1            | 302.09989        | 302.09933     | 1.9  |
| 2            | 369.22610        | 369.22575     | 0.9  |
| 3            | 397.23493        | 397.23439     | 1.4  |
| 4            | 413.22985        | 413.22967     | 0.4  |
| 5            | 409.23493        | 409.23465     | 0.7  |
| 6            | 457.25606        | 457.25499     | 2.3  |
| 7            | 469.22476        | 469.22426     | 1.1  |
| 8            | 598.29865        | 598.29813     | 0.9  |
| 9            | 630.32487        | 630.32429     | 0.9  |
| 10           | 677.42486        | 677.42409     | 1.1  |
| 11           | 710.33716        | ND            | NA   |
| 12           | 783.46672        | ND            | NA   |
| 13           | 815.49294        | 815.49237     | 0.7  |
| 14           | 1004.55666       | 1004.55630    | 0.4  |

|                             |                         |                      |             |
|-----------------------------|-------------------------|----------------------|-------------|
| Characteristic<br>Fragments |                         |                      |             |
|                             | <b>Theoretical mass</b> | <b>Measured mass</b> | <b>Δppm</b> |
|                             | 775.49802               | 775.49760            | 0.5         |
|                             | 803.49297               | 803.49236            | 0.7         |

ND: not detected  
NA: not applicable

# 11-Hydroxy Zotarolimus, m/z = 1004.55666

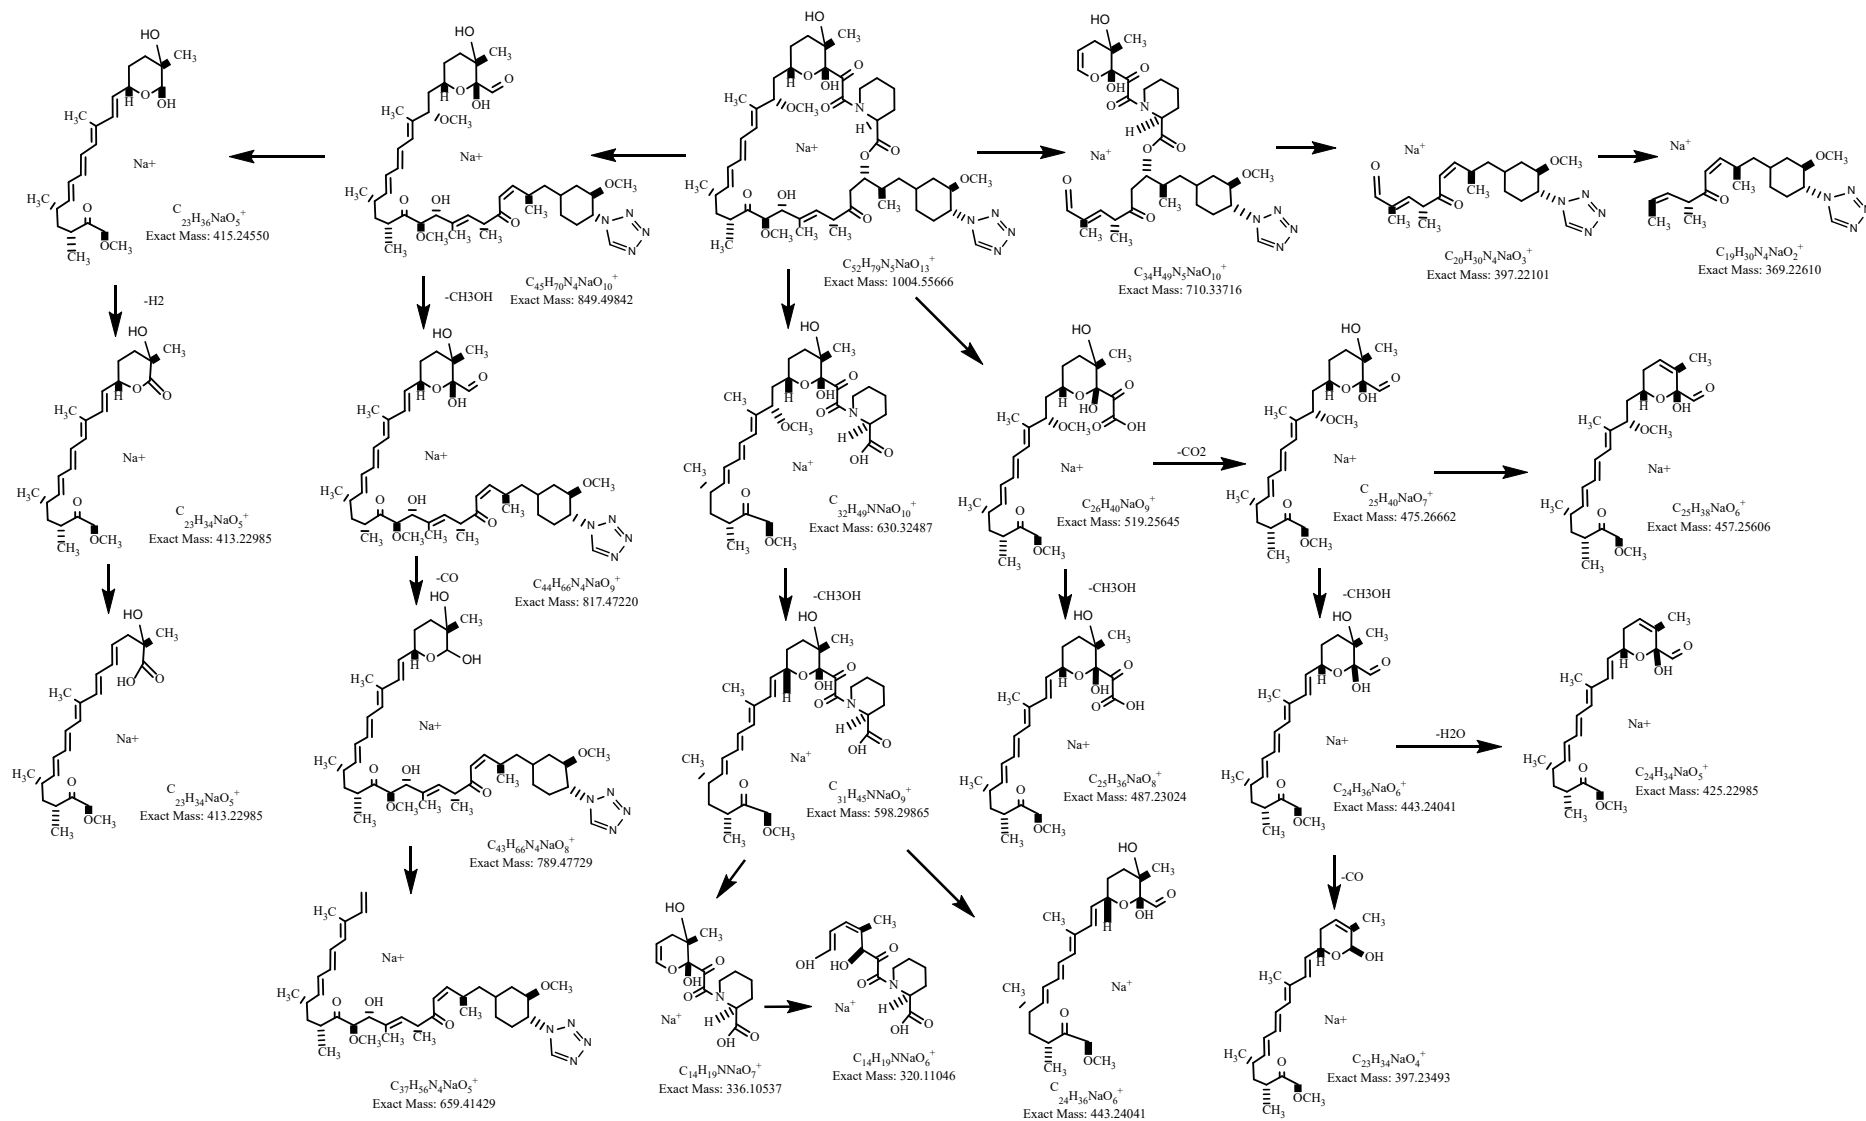

# Characteristic Fragments of 11-Hydroxy Zotarolimus, m/z = 1004.55666

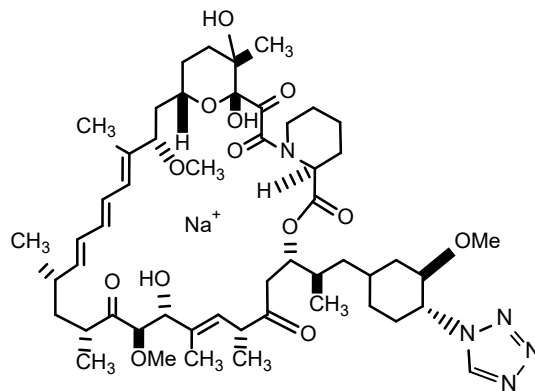

$C_{52}H_{79}N_5NaO_{13}^+$   
Exact Mass: 1004.55666

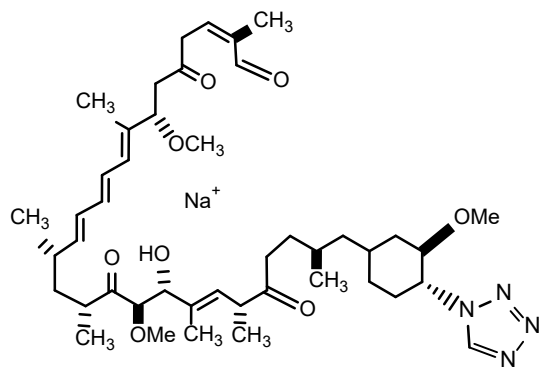

$C_{44}H_{68}N_4NaO_8^+$   
Exact Mass: 803.49294

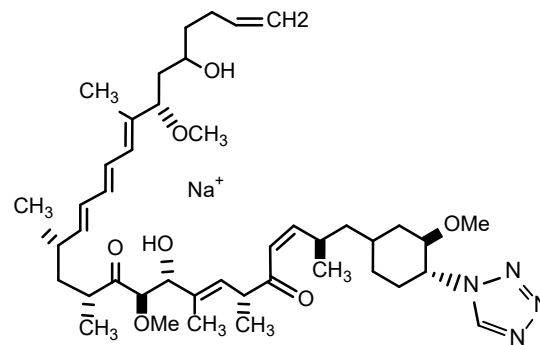

$C_{43}H_{68}N_4NaO_7^+$   
Exact Mass: 775.49802

## Structural Assessment of 11-Hydroxy Zotarolimus by Comparison of Fragmentation Patterns with those of Zotarolimus

| Zotarolimus Fragments    | 11-Hydroxy Zotarolimus Fragments | Comments                             |                                                             |
|--------------------------|----------------------------------|--------------------------------------|-------------------------------------------------------------|
| 320.11046                | 320.11017                        | Hydroxylation with water elimination | 11, 12, 14, and Piperidine-OH present                       |
| 369.22610                | 369.22575                        | no hydroxylation                     | Rules out 47, 48, and 49-OH                                 |
| 381.24002                | 397.23439                        | (+16) Hydroxylation                  | 11, 12, 14, 23, 24, 25, 45, or 46-OH present                |
| 397.23493                | 413.22967                        | (+16) Hydroxylation                  | 11, 12, 14, 23, 24, 25, 45, or 46-OH present                |
| 409.23493                | 425.22930                        | (+16) Hydroxylation                  | 11, 12, 14, 23, 24, 25, 45, or 46-OH present                |
| 427.24550                | 441.26103                        | (+16) Hydroxylation                  | 11, 12, 14, 23, 24, 25, 45, or 46-OH present                |
| 453.22476                | 469.22426                        | (+16) Hydroxylation                  | 11, 12, 14, 23, 24, 25, 45, or 46-OH present                |
| 582.30374                | 598.29813                        | (+16) Hydroxylation                  | 11, 12, 14, 23, 24, 25, 45, 46-OH, or piperidine-OH present |
| 614.32995                | 630.32429                        | (+16) Hydroxylation                  | 11, 12, 14, 23, 24, 25, 45, 46-OH, or piperidine-OH present |
| 659.41429                | 659.41397                        | no hydroxylation                     | Rules out 23, 24, 25, 45, 46, 47, 48 and 49-OH              |
| 694.34225                | ND                               |                                      | NA                                                          |
| 783.46672                | ND                               |                                      | NA                                                          |
| 988.56174                | 1004.55630                       | (+16) Hydroxylation                  |                                                             |
| Characteristic Fragments |                                  |                                      | 775, 803                                                    |
| Determinant patterns     |                                  |                                      |                                                             |

ND: not detected  
NA: not applicable

25-Hydroxy Zotarolimus,  $m/z = 1004.55666$

## 25-Hydroxy Zotarolimus, m/z = 1004.55666

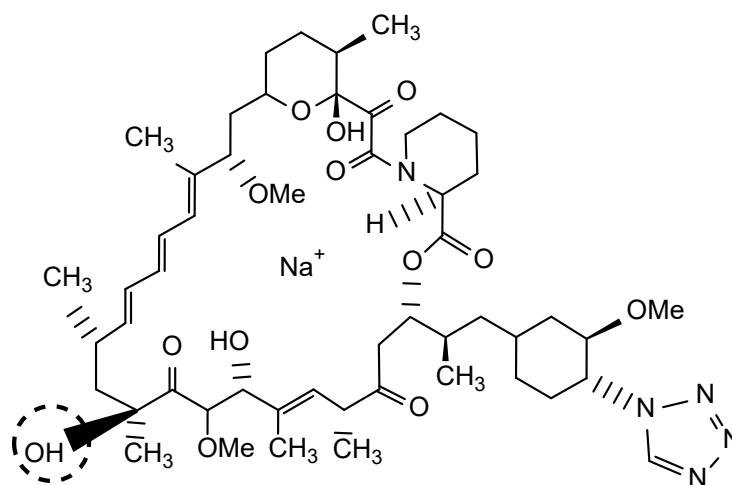

Chemical Formula: C<sub>52</sub>H<sub>79</sub>N<sub>5</sub>NaO<sub>13</sub><sup>+</sup>

Exact Mass: 1004.55666

25-hydroxy zotarolimus

# 25-Hydroxy Zotarolimus, $m/z = 1004.55666$ Extracted Ion Chromatogram (EIC)

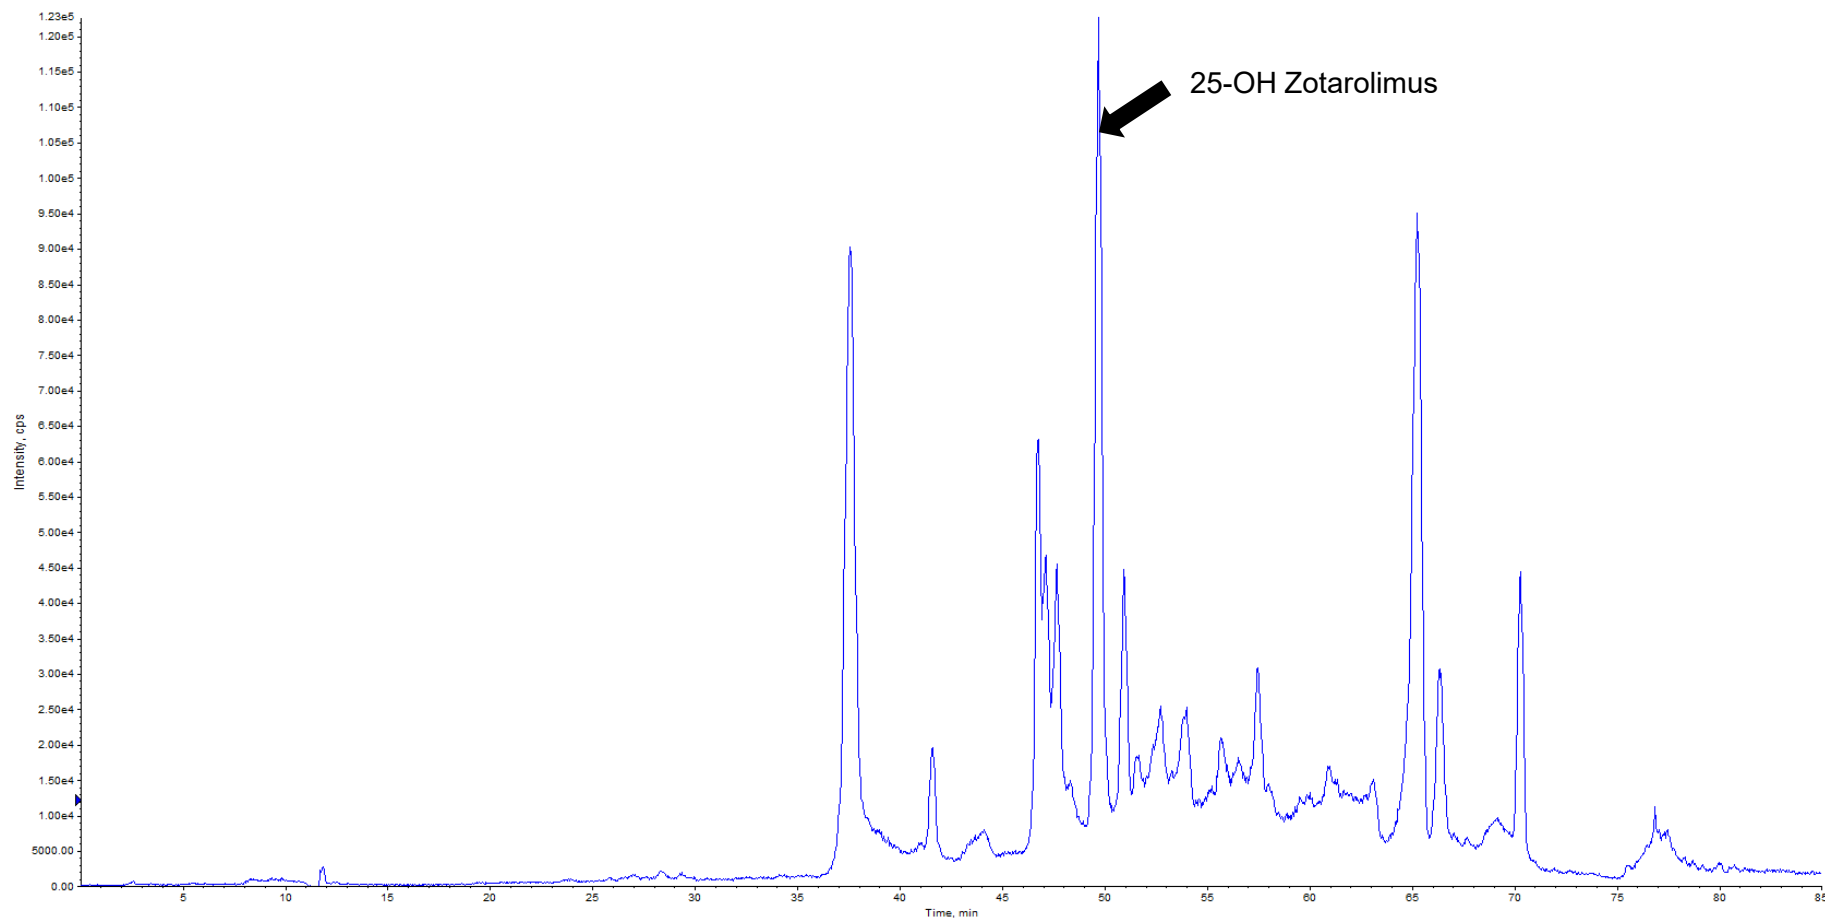



# Mass Spectrum of 25-Hydroxy Zotarolimus

CE = 75 eV, DP = 125 V

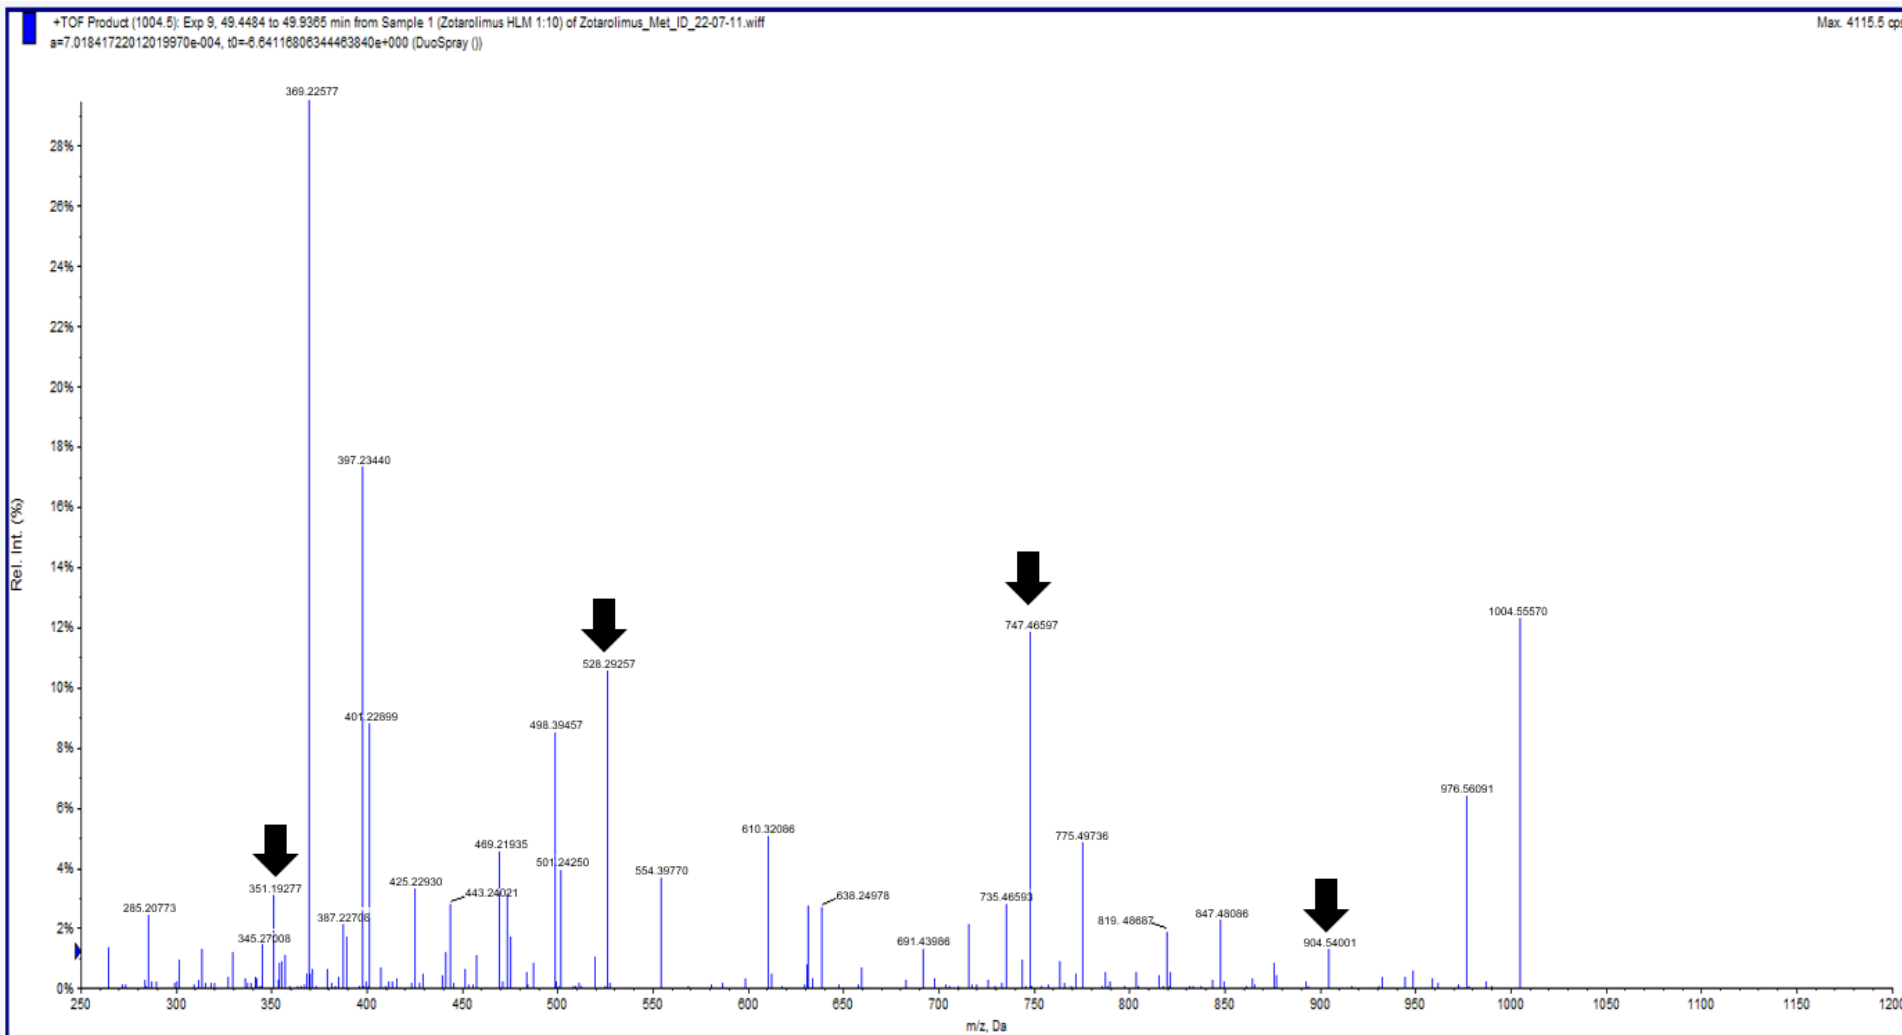

## Δppm of 25-Hydroxy Zotarolimus Fragments

| Fragment No. | Theoretical mass | Measured mass | Δppm |
|--------------|------------------|---------------|------|
| 1            | 320.11046        | Very low      | NA   |
| 2            | 369.22610        | 369.22577     | 0.9  |
| 3            | 397.23493        | 397.23440     | 1.3  |
| 4            | 413.22985        | 413.22955     | 0.7  |
| 5            | 425.22985        | 425.22930     | 1.3  |
| 6            | 443.24041        | 443.24021     | 0.3  |
| 7            | 457.25606        | 457.25583     | 0.5  |
| 8            | 469.21967        | 469.21935     | 0.7  |
| 9            | 598.29865        | 598.29799     | 1.1  |
| 10           | 630.32487        | 630.32429     | 0.9  |
| 11           | 675.40921        | ND            | NA   |
| 12           | 694.34225        | ND            | NA   |
| 13           | 771.46672        | ND            | NA   |
| 14           | 904.54061        | 904.54001     | 0.7  |
| 15           | 1004.55666       | 1004.55570    | 1.0  |

|                             | Theoretical mass | Measured mass | Δppm |
|-----------------------------|------------------|---------------|------|
| Characteristic<br>Fragments | 351.19307        | 351.19277     | 0.9  |
|                             | 528.29317        | 528.29257     | 1.1  |
|                             | 904.54061        | 904.54001     | 0.7  |
|                             | 747.46672        | 747.46597     | 1.0  |

ND: not detected  
NA: not applicable

# 25-Hydroxy Zotarolimus, m/z = 1004.55666

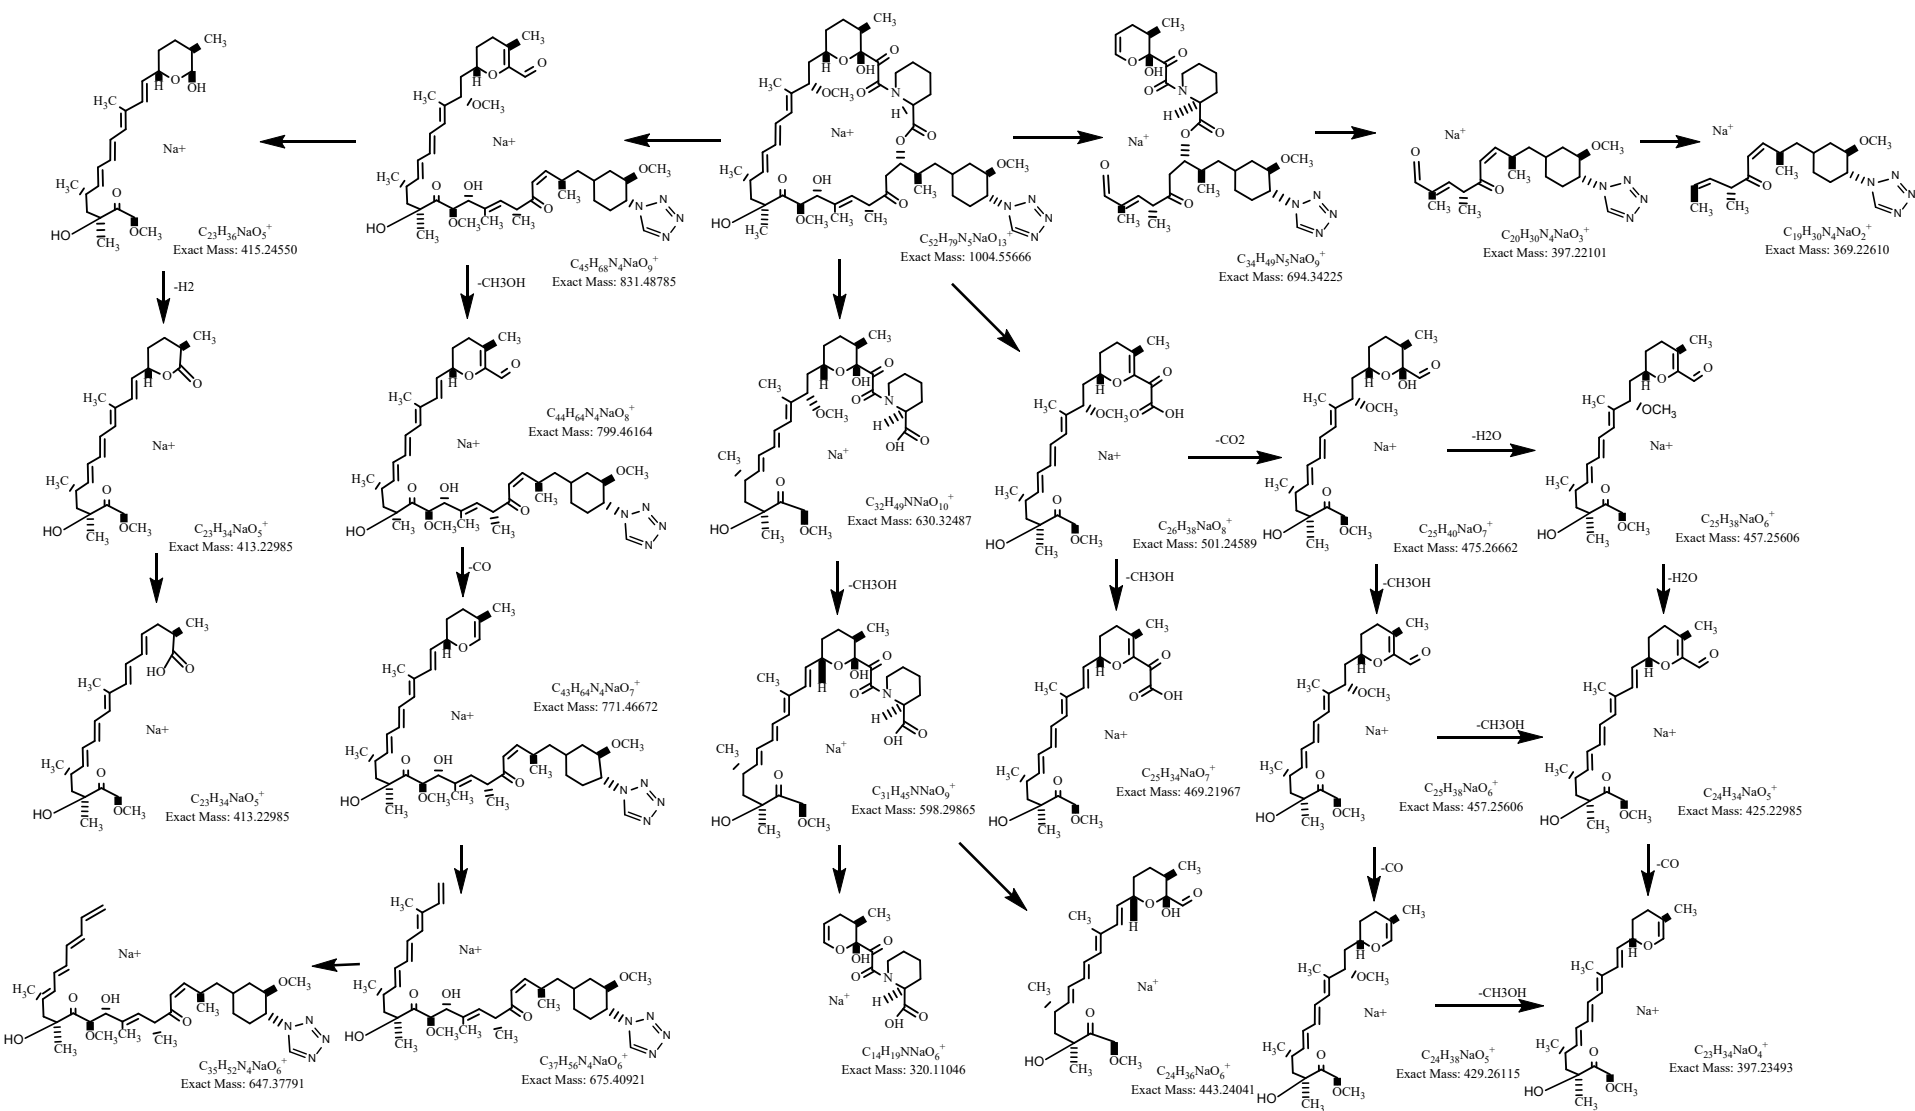

# Characteristic Fragments of 25-Hydroxy Zotarolimus, $m/z = 1004.55666$

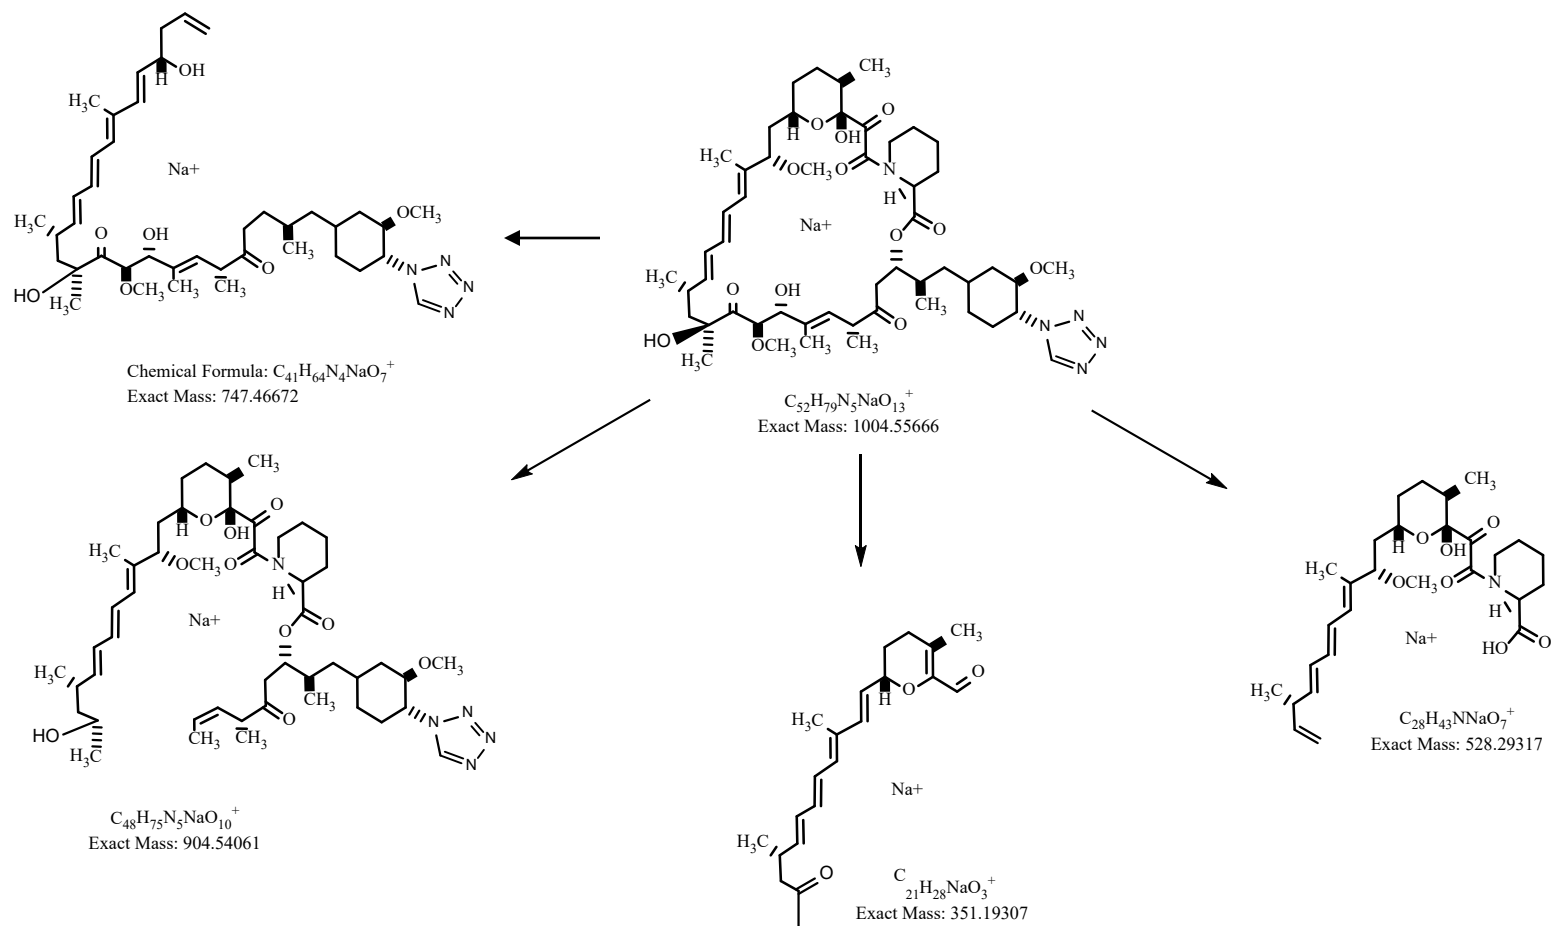

## Structural Assessment of 25-Hydroxy Zotarolimus by Comparison of Fragmentation Patterns with those of Zotarolimus

| Zotarolimus Fragments    | 25-Hydroxy Zotarolimus Fragments | Comments            |                                                             |
|--------------------------|----------------------------------|---------------------|-------------------------------------------------------------|
| 320.11046                | 320.11020                        | no hydroxylation    | Rules out OH-piperidine, 11, 12, and 14-OH                  |
| 369.22610                | 369.22577                        | no hydroxylation    | Rules out 47, 48, and 49-OH                                 |
| 381.24002                | 397.23440                        | (+16) Hydroxylation | 11, 12, 14, 23, 24, 25, 45, or 46-OH present                |
| 397.23493                | 397.23440                        | (+16) Hydroxylation | Rules out 47, 48, and 49-OH                                 |
| 409.23493                | 425.22930                        | (+16) Hydroxylation | 11, 12, 14, 23, 24, 25, 45, or 46-OH present                |
| 427.24550                | 443.24021                        | (+16) Hydroxylation | 11, 12, 14, 23, 24, 25, 45, or 46-OH present                |
| 441.26115                | ND                               | (+16) Hydroxylation | NA                                                          |
| 453.22476                | 469.21935                        | (+16) Hydroxylation | 11, 12, 14, 23, 24, 25, 45, or 46-OH present                |
| 582.30374                | 598.29799                        | (+16) Hydroxylation | 11, 12, 14, 23, 24, 25, 45, 46-OH, or piperidine-OH present |
| 614.32995                | 630.32429                        | (+16) Hydroxylation | 11, 12, 14, 23, 24, 25, 45, 46-OH, or piperidine-OH present |
| 659.41429                | ND                               | (+16) Hydroxylation | NA                                                          |
| 694.34225                | ND                               | no hydroxylation    | NA                                                          |
| 783.46672                | 799.46031                        | (+16) Hydroxylation | Rules out OH-piperidine                                     |
| 815.49294                | ND                               | (+16) Hydroxylation | NA                                                          |
| 988.56174                | 1004.5559                        | (+16) Hydroxylation |                                                             |
| Characteristic Fragments |                                  |                     | 351, 528, 904                                               |
| Determinant patterns     |                                  |                     |                                                             |

ND: not detected  
NA: not applicable

# Hydroxy-Piperidine Zotarolimus (I), $m/z = 1004.55666$

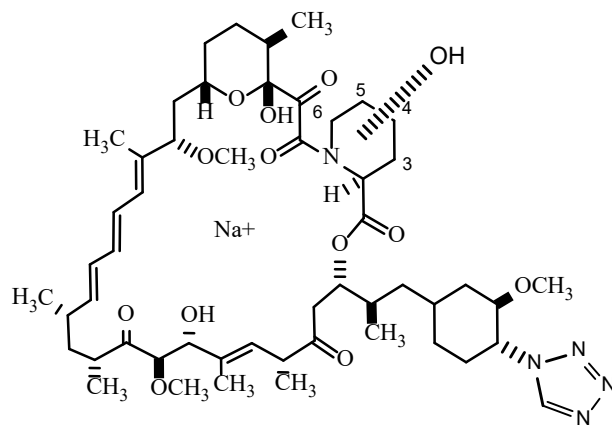

# 3/4/5/6-Hydroxy Piperidine Zotarolimus (I), $m/z = 1004.55666$ Extracted Ion Chromatogram (EIC)

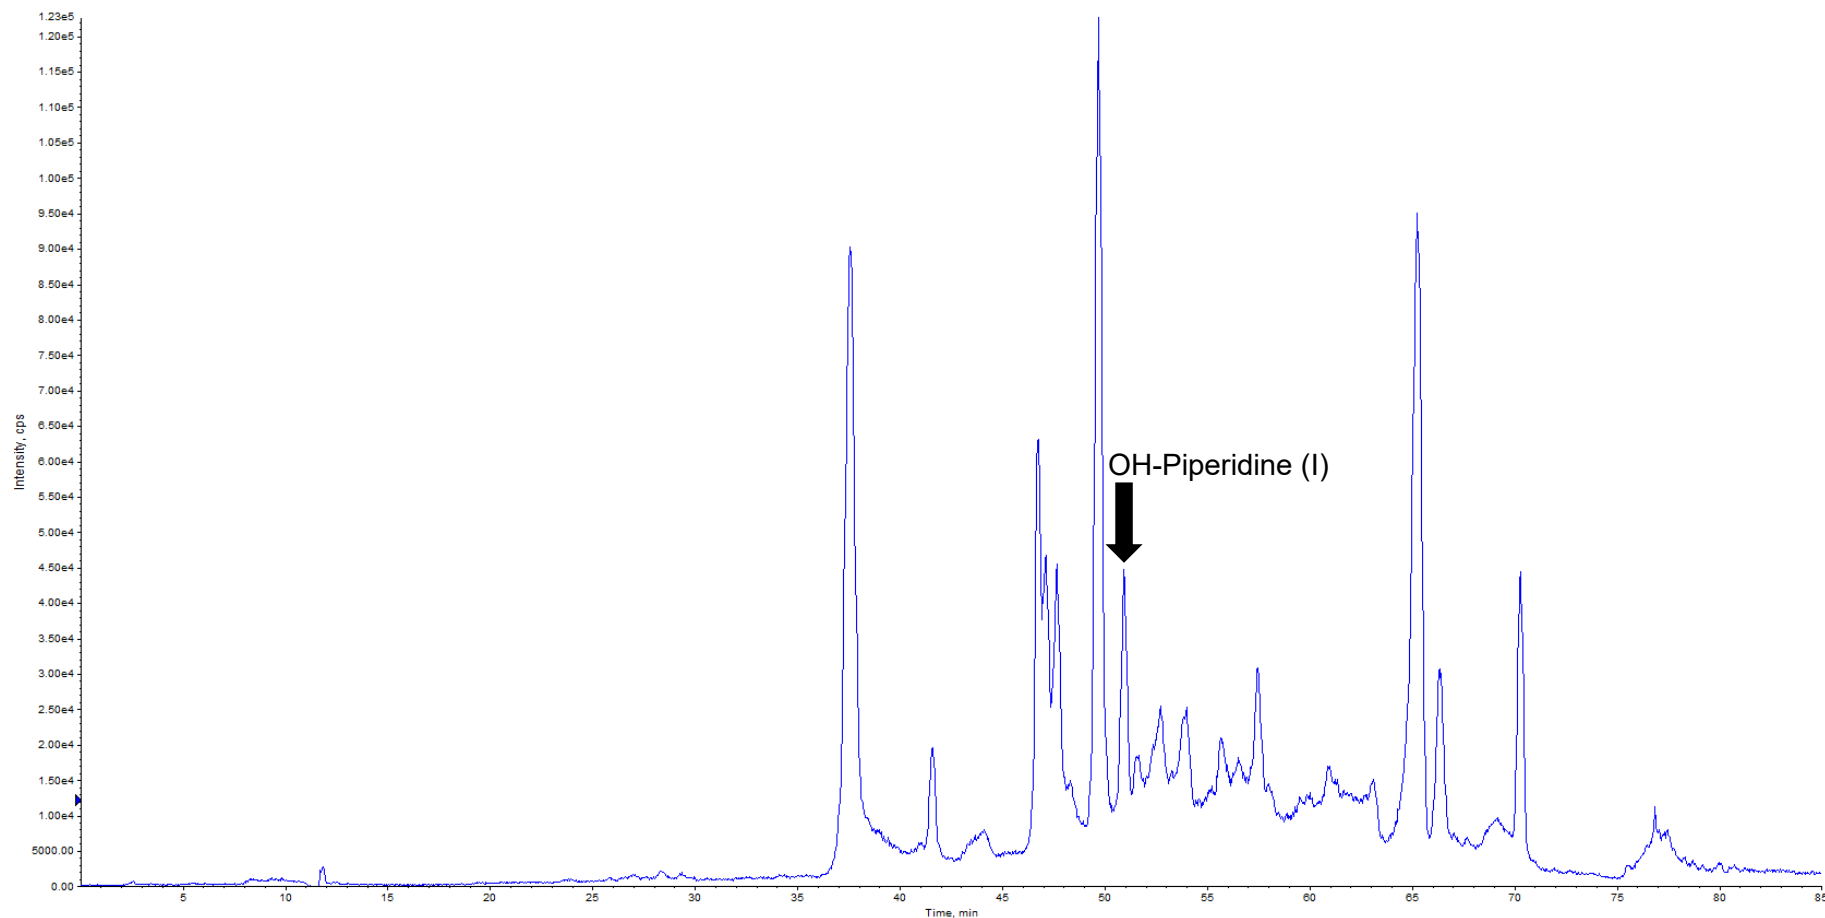

# Mass Spectrum of 3/4/5/6-Hydroxy Piperidine Zotarolimus (I)

CE = 75 eV, DP = 125 V

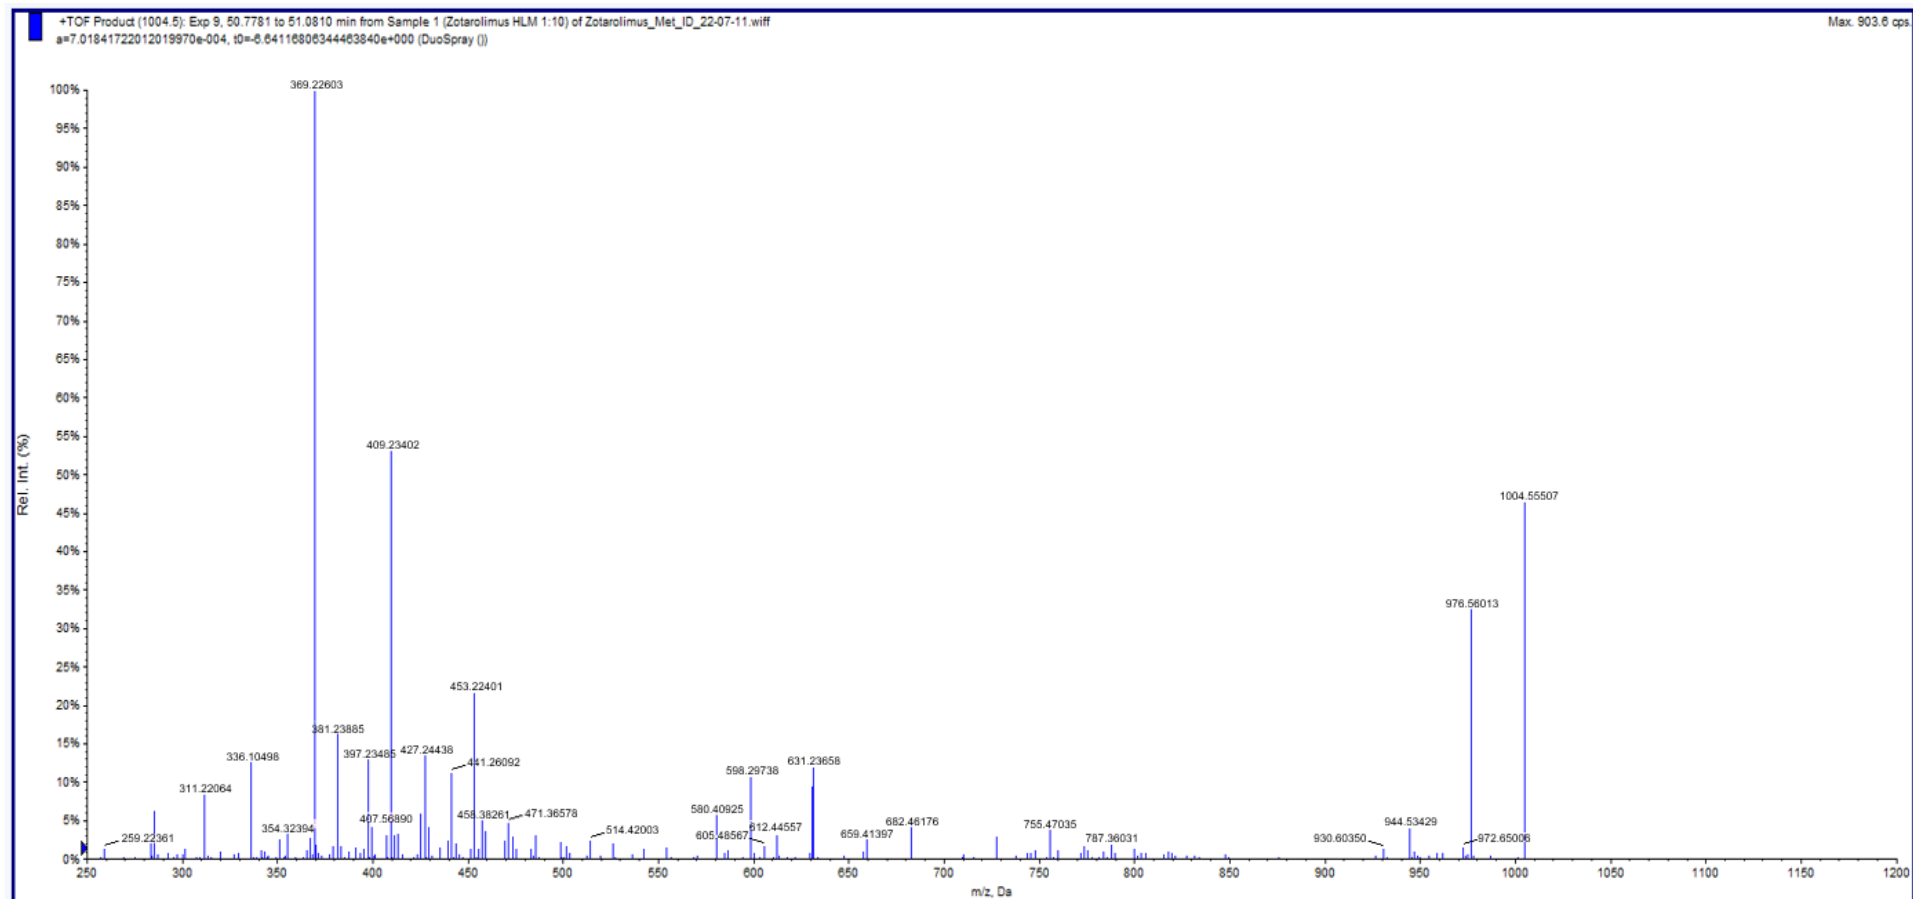



## $\Delta$ ppm of Hydroxy-Piperidine Zotarolimus (I) Fragments

---

| Fragment No. | Theoretical mass | Measured mass | $\Delta$ ppm |
|--------------|------------------|---------------|--------------|
| 1            | 336.10537        | 336.10498     | 1.2          |
| 2            | 369.22610        | 369.22603     | 0.2          |
| 3            | 381.24002        | 381.23885     | 3.1          |
| 4            | 397.23493        | 397.23485     | 0.2          |
| 5            | 409.23493        | 409.23402     | 2.2          |
| 6            | 427.24550        | 427.24438     | 2.6          |
| 7            | 441.26115        | 441.26092     | 0.5          |
| 8            | 453.22476        | 453.22401     | 1.7          |
| 9            | 598.29865        | 598.29738     | 2.1          |
| 10           | 630.32487        | 630.32397     | 1.4          |
| 11           | 659.41429        | 659.41397     | 0.5          |
| 12           | 710.33716        | 710.33681     | 0.5          |
| 13           | 783.46672        | 783.46537     | 1.7          |
| 14           | 815.49294        | 815.49203     | 1.1          |
| 15           | 1004.55666       | 1004.55507    | 1.6          |

# Fragmentation Pattern of 3/4/5/6-Hydroxy Piperidine Zotarolimus, m/z = 1004.55666

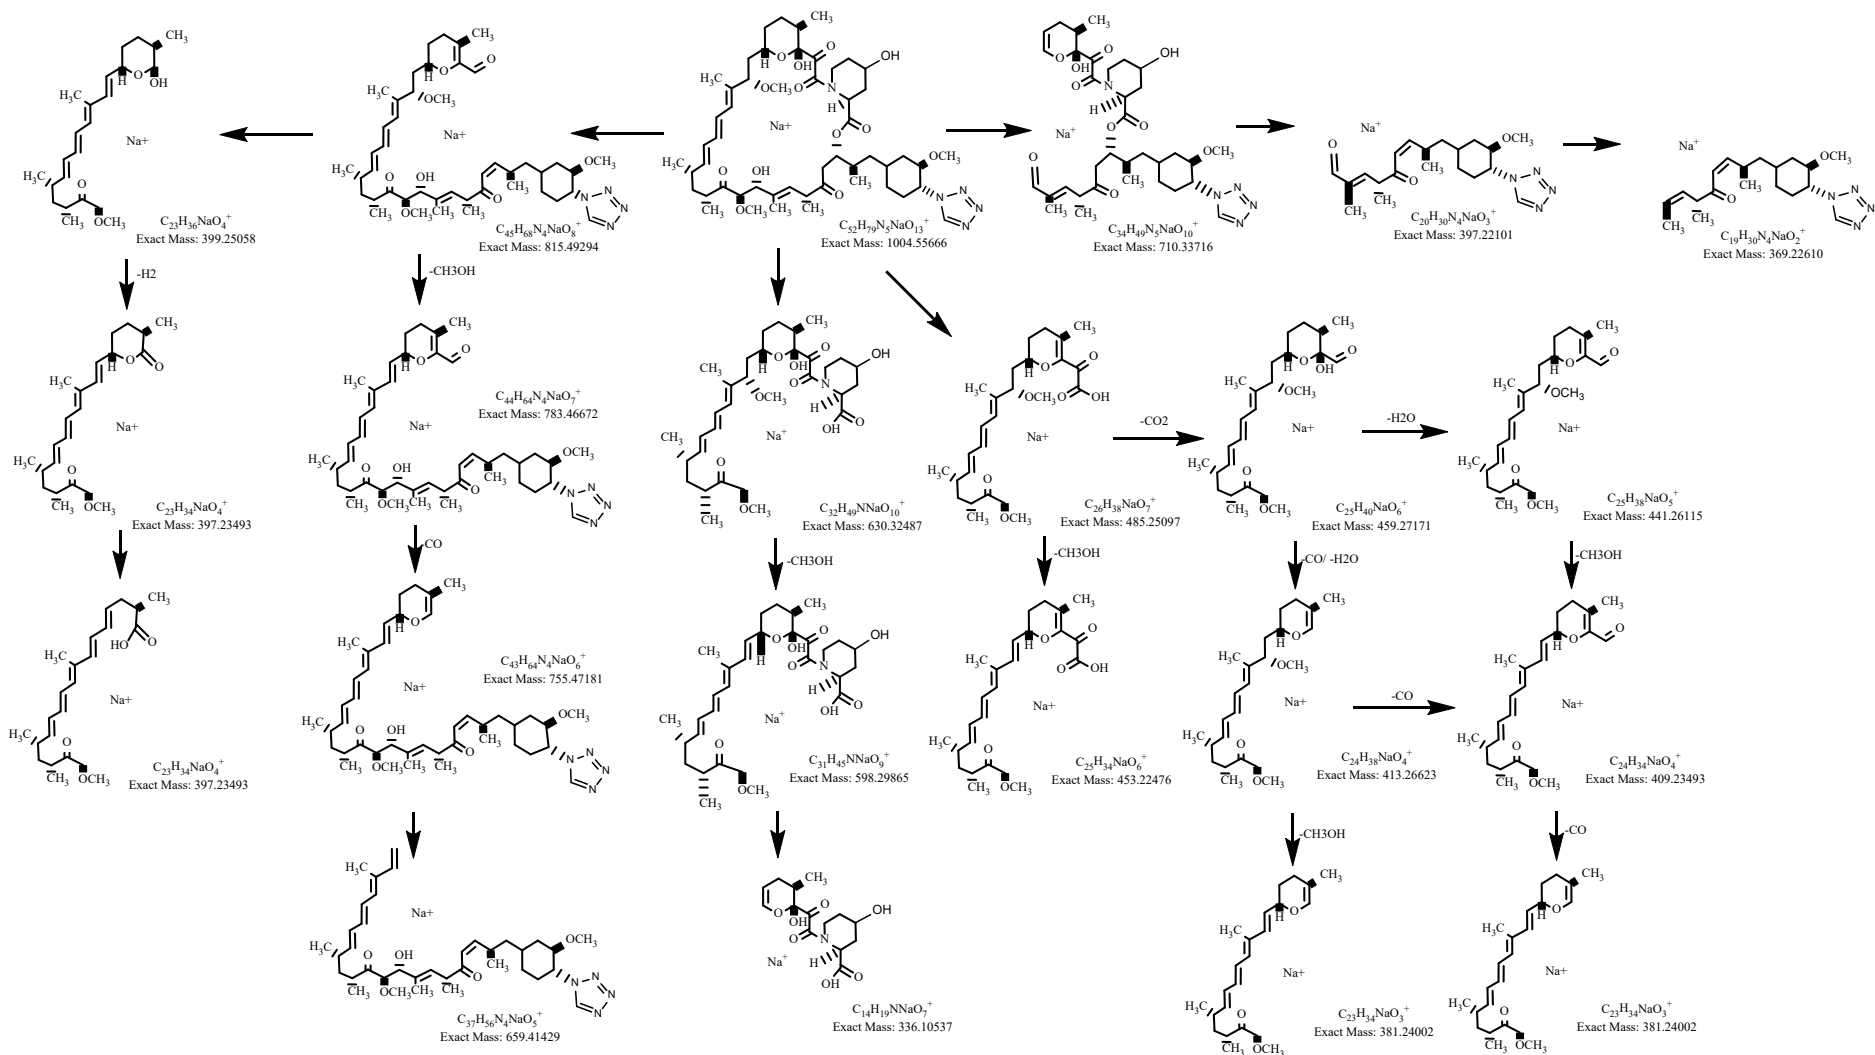

## Structural Confirmation of Hydroxy Piperidine (I) Zotarolimus, m/z = 1004.55666

---

| Zotarolimus Fragments    | Pip-OH Zotarolimus (I) Fragments | Comments            |                                                                    |
|--------------------------|----------------------------------|---------------------|--------------------------------------------------------------------|
| 320.11046                | 336.10498                        | (+16) Hydroxylation | 11, 12, or OH-piperidine                                           |
| 369.22610                | 369.22603                        | no hydroxylation    | Rules out 47, 48, and 49-OH                                        |
| 381.24002                | 381.23885                        | no hydroxylation    | Rules out 11, 12, 14, 23, 24, 25, 45, or 46-OH present             |
| 397.23493                | 397.23485                        | no hydroxylation    | Rules out 11, 12, 14, 23, 24, 25, 45, or 46-OH present             |
| 409.23493                | 409.23402                        | no hydroxylation    | Rules out 11, 12, 14, 23, 24, 25, 45, or 46-OH present             |
| 441.26115                | 441.26092                        | no hydroxylation    | Rules out 11, 12, 14, 23, 24, 25, 45, or 46-OH present             |
| 453.22476                | 453.22401                        | no hydroxylation    | Rules out 11, 12, 14, 23, 24, 25, 45, or 46-OH                     |
| 582.30374                | 598.29738                        | (+16) Hydroxylation | 11, 12, 14, 23, 24, 25, 45, 46-OH, or piperidine-OH present        |
| 614.32995                | 630.32397                        | (+16) Hydroxylation | 11, 12, 14, 23, 24, 25, 45, 46-OH, or piperidine-OH present        |
| 659.41429                | 659.41397                        | no hydroxylation    | Rules out 23, 24, 25, 45, 46, 47, 48, or 49-OH                     |
| 694.34225                | 710.33681                        | (+16) Hydroxylation | 11, 12, 14, 48, 49, 50, or Pip-OH                                  |
| 783.46672                | 783.46537                        | no hydroxylation    | Rules out 11, 12, 14, 23, 24, 25, 45, 46, 47, 48, or 49-OH present |
| 815.49294                | 815.49203                        | no hydroxylation    | Rules out 11, 12, 14, 23, 24, 25, 45, 46, 47, 48, or 49-OH present |
| 988.56174                | 1004.55507                       | (+16) Hydroxylation |                                                                    |
| Characteristic Fragments |                                  |                     | 336                                                                |
| Determinant patterns     |                                  |                     |                                                                    |

---

14-Hydroxy Zotarolimus,  $m/z = 1004.55666$

# 14-Hydroxy Zotarolimus, m/z = 1004.55666

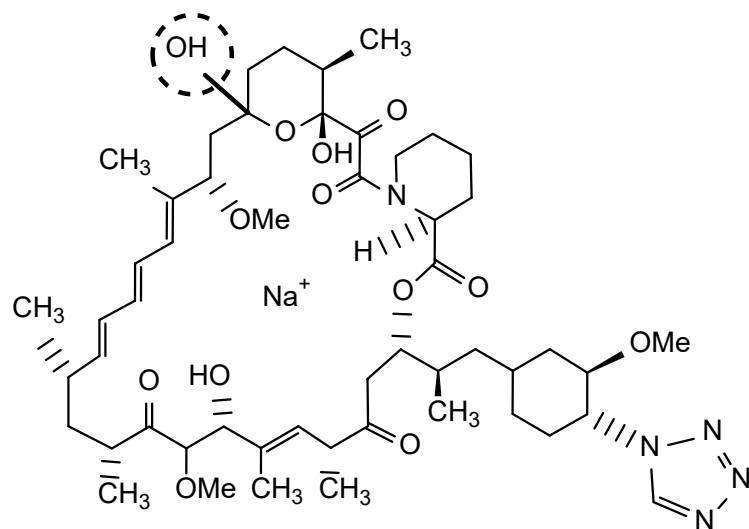

Chemical Formula:  $C_{52}H_{79}N_5NaO_{13}^+$

Exact Mass: 1004.55666

14-hydroxy zotarolimus

# 14-Hydroxy Zotarolimus, $m/z = 1004.55666$ Extracted Ion Chromatogram (EIC)

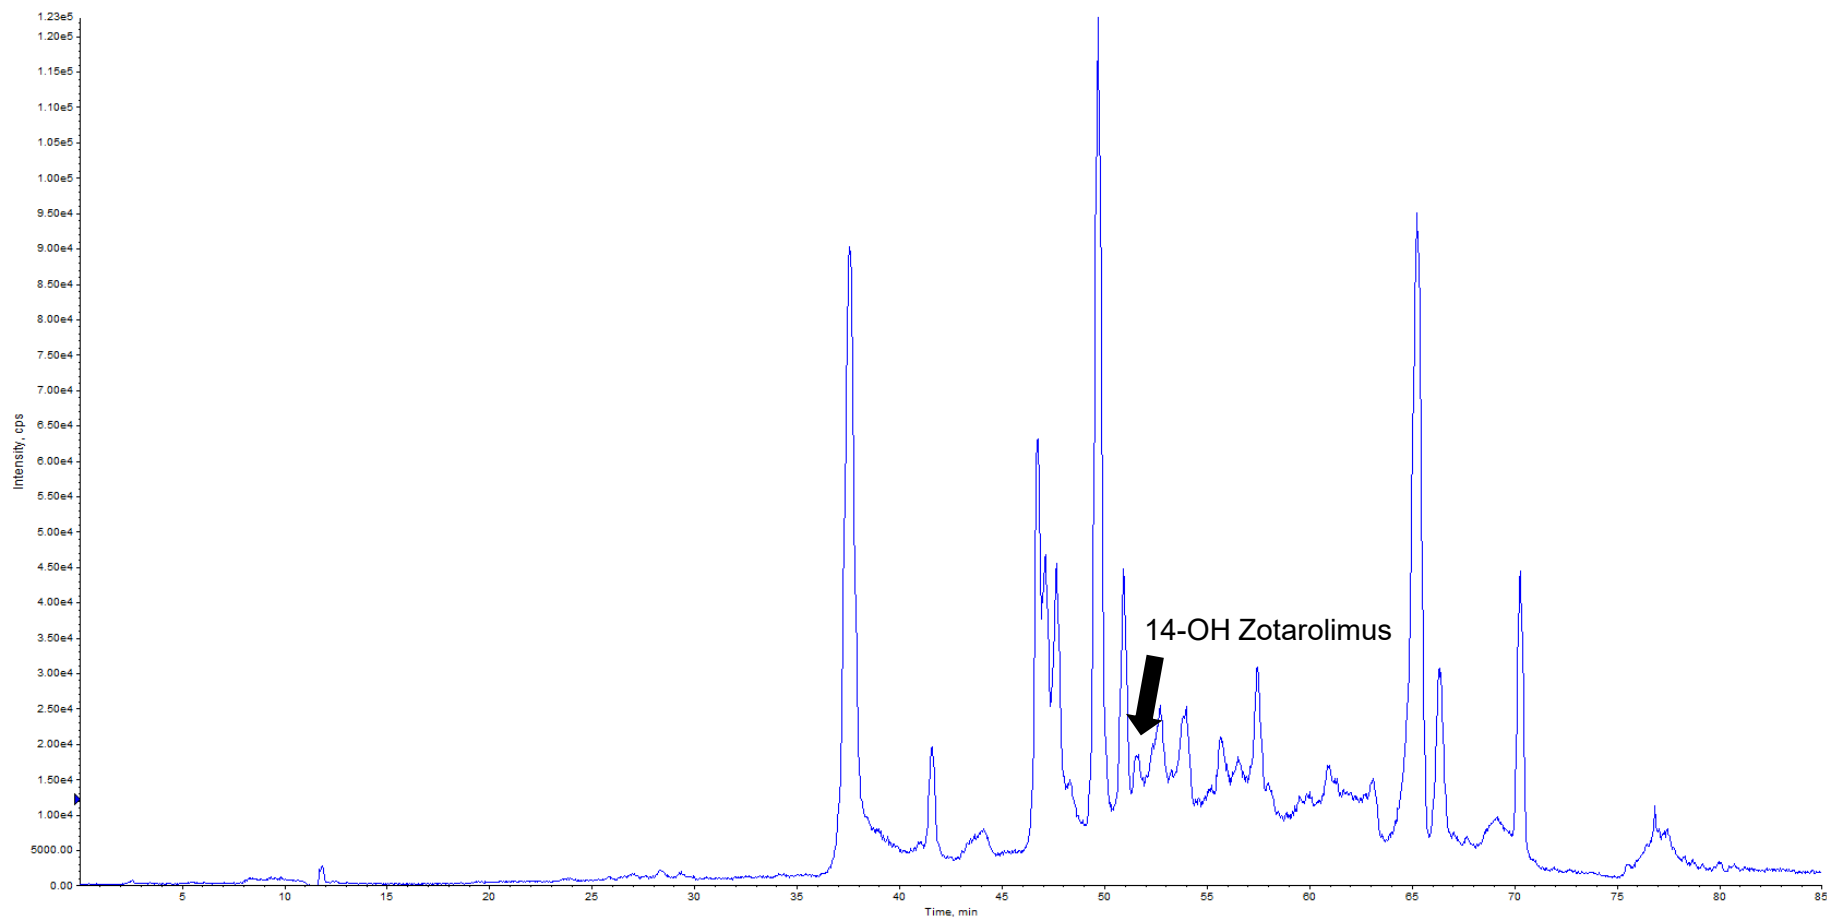

# Mass Spectrum of 14-Hydroxy Zotarolimus

CE = 75 eV, DP = 125 V

+TOF Product (1004.5): Exp 9, 55.2500 to 55.8394 min from Sample 2 (Zotarolimus HLM 1:10) of Zotarolimus\_Met\_ID\_22-07-08.wiff  
a=7.01841722012019970e+004, y0=-6.64116806344483840e+000 (DuoSpray I)

Max. 409.2 cps

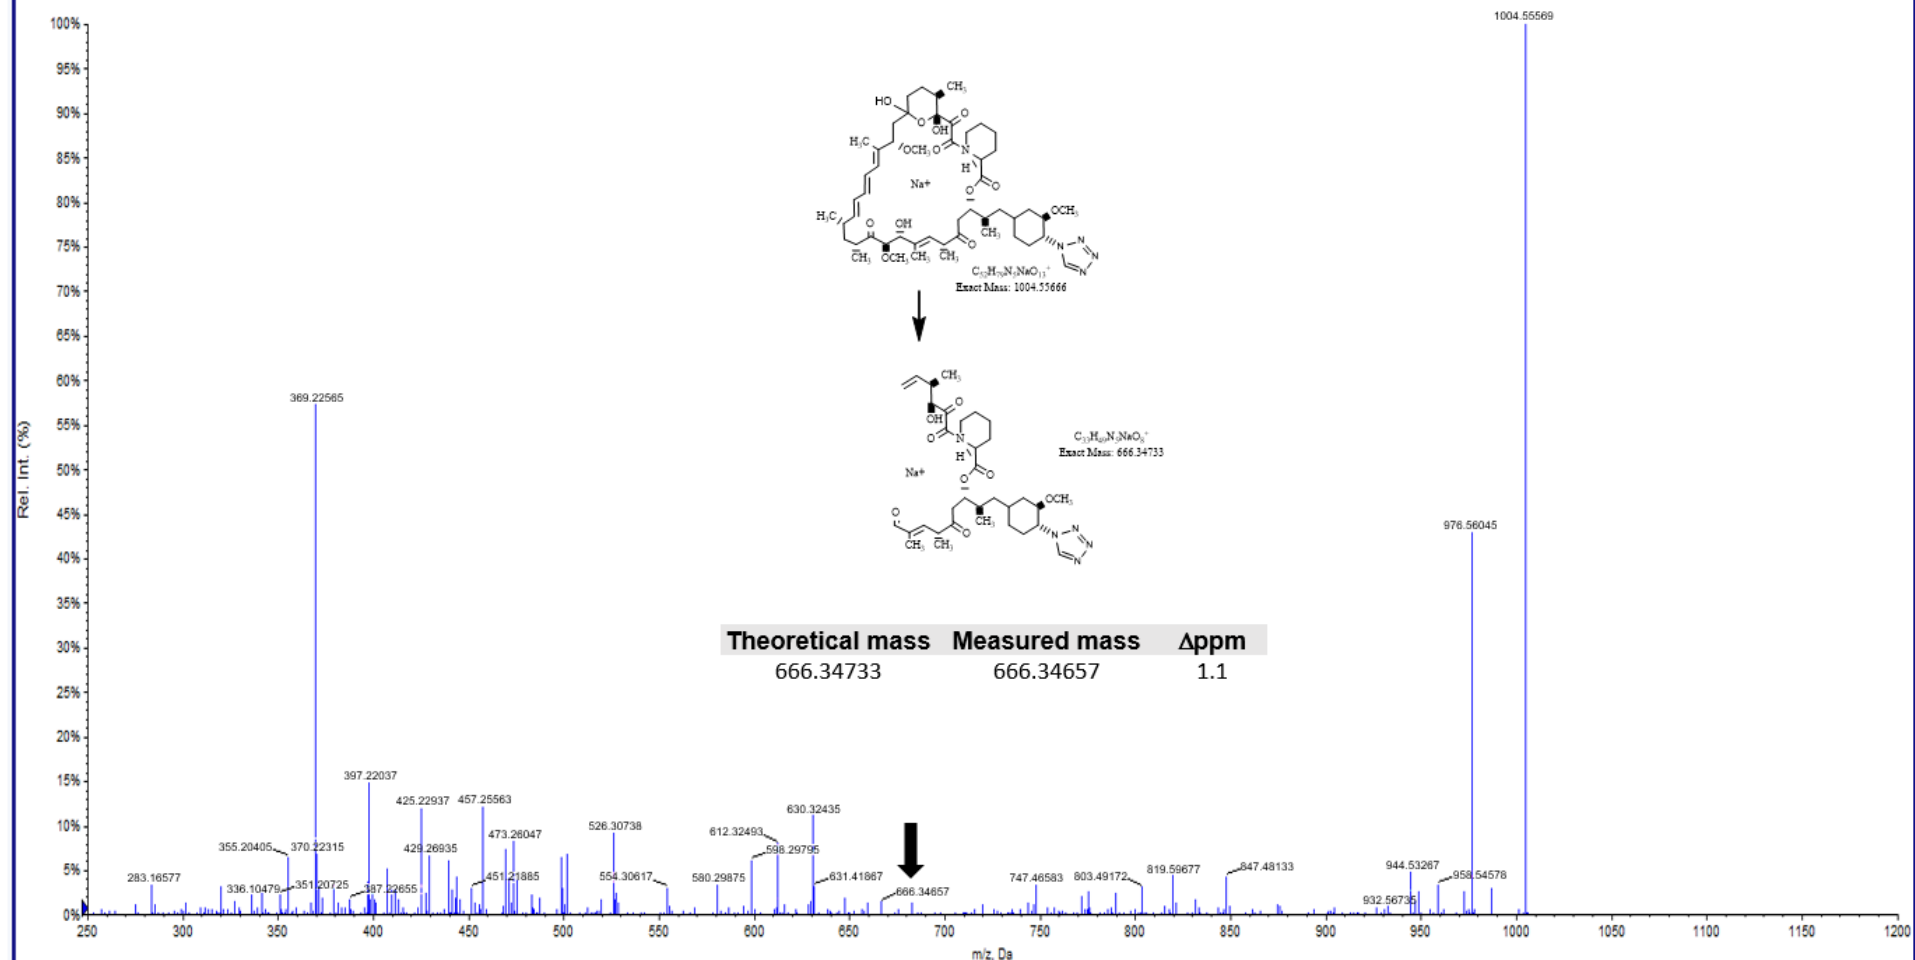

## Δppm of 14-Hydroxy Zotarolimus Fragments

---

| Fragment No. | Theoretical mass | Measured mass | Δppm |
|--------------|------------------|---------------|------|
| 1            | 320.11046        | 320.11009     | 1.2  |
| 2            | 336.10537        | 336.10479     | 1.7  |
| 3            | 369.2261         | 369.22565     | 1.2  |
| 4            | 397.22101        | 397.22037     | 1.6  |
| 5            | 413.22985        | 413.22935     | 1.2  |
| 6            | 425.22985        | 425.22937     | 1.1  |
| 7            | 457.25606        | 457.25563     | 0.9  |
| 8            | 475.26662        | 475.26579     | 1.7  |
| 9            | 598.29865        | 598.29795     | 1.2  |
| 10           | 630.32487        | 630.32435     | 0.8  |
| 11           | 659.41429        | 659.41377     | 0.8  |
| 12           | 803.49294        | 803.49172     | 1.5  |
| 13           | 1004.55666       | 1004.55569    | 1.0  |

|                         | theoretical mass | measured mass | Δppm |
|-------------------------|------------------|---------------|------|
| Characteristic Fragment | 666.34733        | 666.34657     | 1.1  |

---



# Fragmentation Pattern of 14-Hydroxy Zotarolimus, $m/z = 1004.55666$

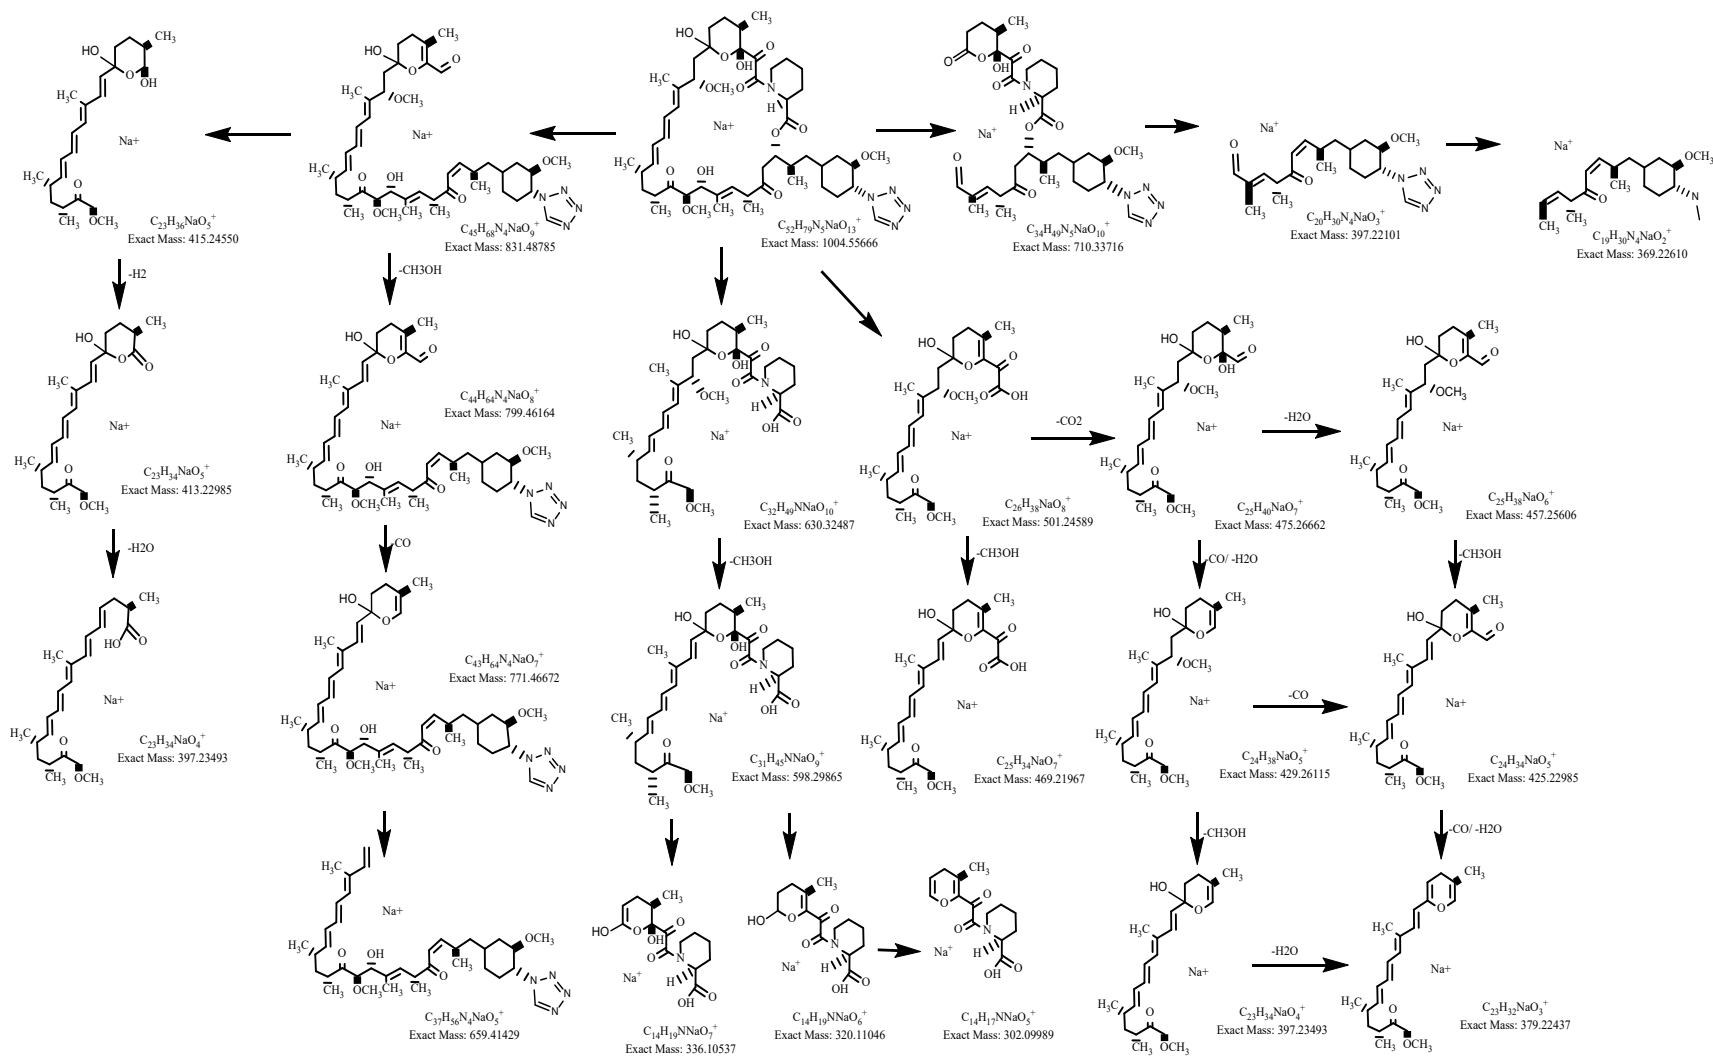

## Characteristic Fragment of 14-Hydroxy Zotarolimus, $m/z = 1004.55666$

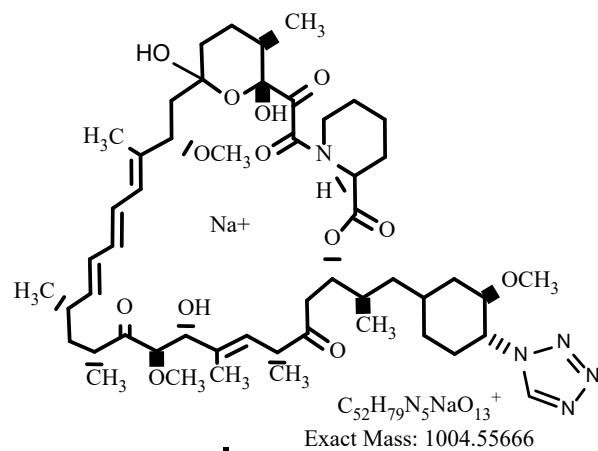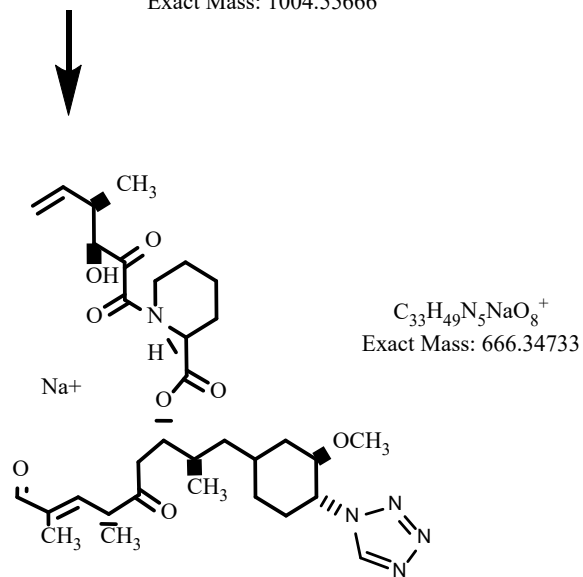

## Structural Confirmation of 14-Hydroxy Zotarolimus, m/z = 1004.55666

---

| Zotarolimus<br>Fragments | 14-Hydroxy<br>Zotarolimus<br>Fragments | Comments            |                                                             |
|--------------------------|----------------------------------------|---------------------|-------------------------------------------------------------|
|                          |                                        |                     |                                                             |
| 320.11046                | 336.10479                              | (+16) Hydroxylation | 11, 12, 14, and Piperidine-OH present                       |
| 369.22610                | 369.22565                              | No Hydroxylation    | Rules out 47, 48, and 49-OH                                 |
| 381.24002                | 397.22037                              | (+16) Hydroxylation | 11, 12, 14, 23, 24, 25, 45, or 46-OH present                |
| 397.23493                | 397.22037                              | No Hydroxylation    | Rules out 47, 48, and 49-OH                                 |
| 441.26115                | 457.25563                              | (+16) Hydroxylation | 11, 12, 14, 23, 24, 25, 45, or 46-OH present                |
| 459.27171                | 475.26579                              | (+16) Hydroxylation | 11, 12, 14, 23, 24, 25, 45, or 46-OH present                |
| 582.30374                | 598.29795                              | (+16) Hydroxylation | 11, 12, 14, 23, 24, 25, 45, 46-OH, or piperidine-OH present |
| 614.32995                | 630.32435                              | (+16) Hydroxylation | 11, 12, 14, 23, 24, 25, 45, 46-OH, or piperidine-OH present |
| 659.41429                | 659.41377                              | No Hydroxylation    | Rules out 23, 24, 25, 45, 46, 47, 48, and 49-OH             |
| 988.56174                | 1004.55569                             | (+16) Hydroxylation |                                                             |
| Characteristic Fragments |                                        |                     | 666                                                         |
| Determinant patterns     |                                        |                     |                                                             |

---

Hydroxy-Piperidine Zotarolimus (II),  $m/z = 1004.55666$ 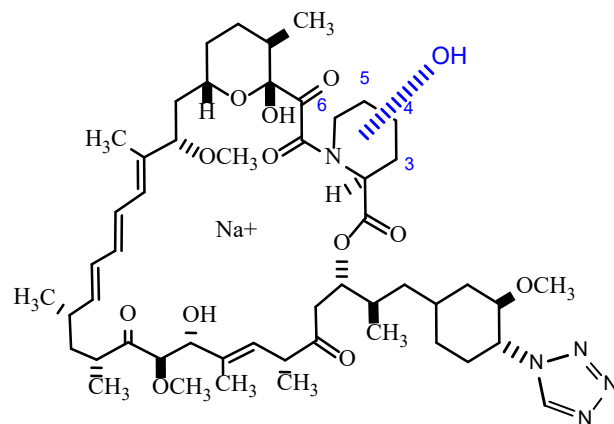

# 3/4/5/6-Hydroxy Piperidine Zotarolimus (II), $m/z = 1004.55666$ Extracted Ion Chromatogram (EIC)

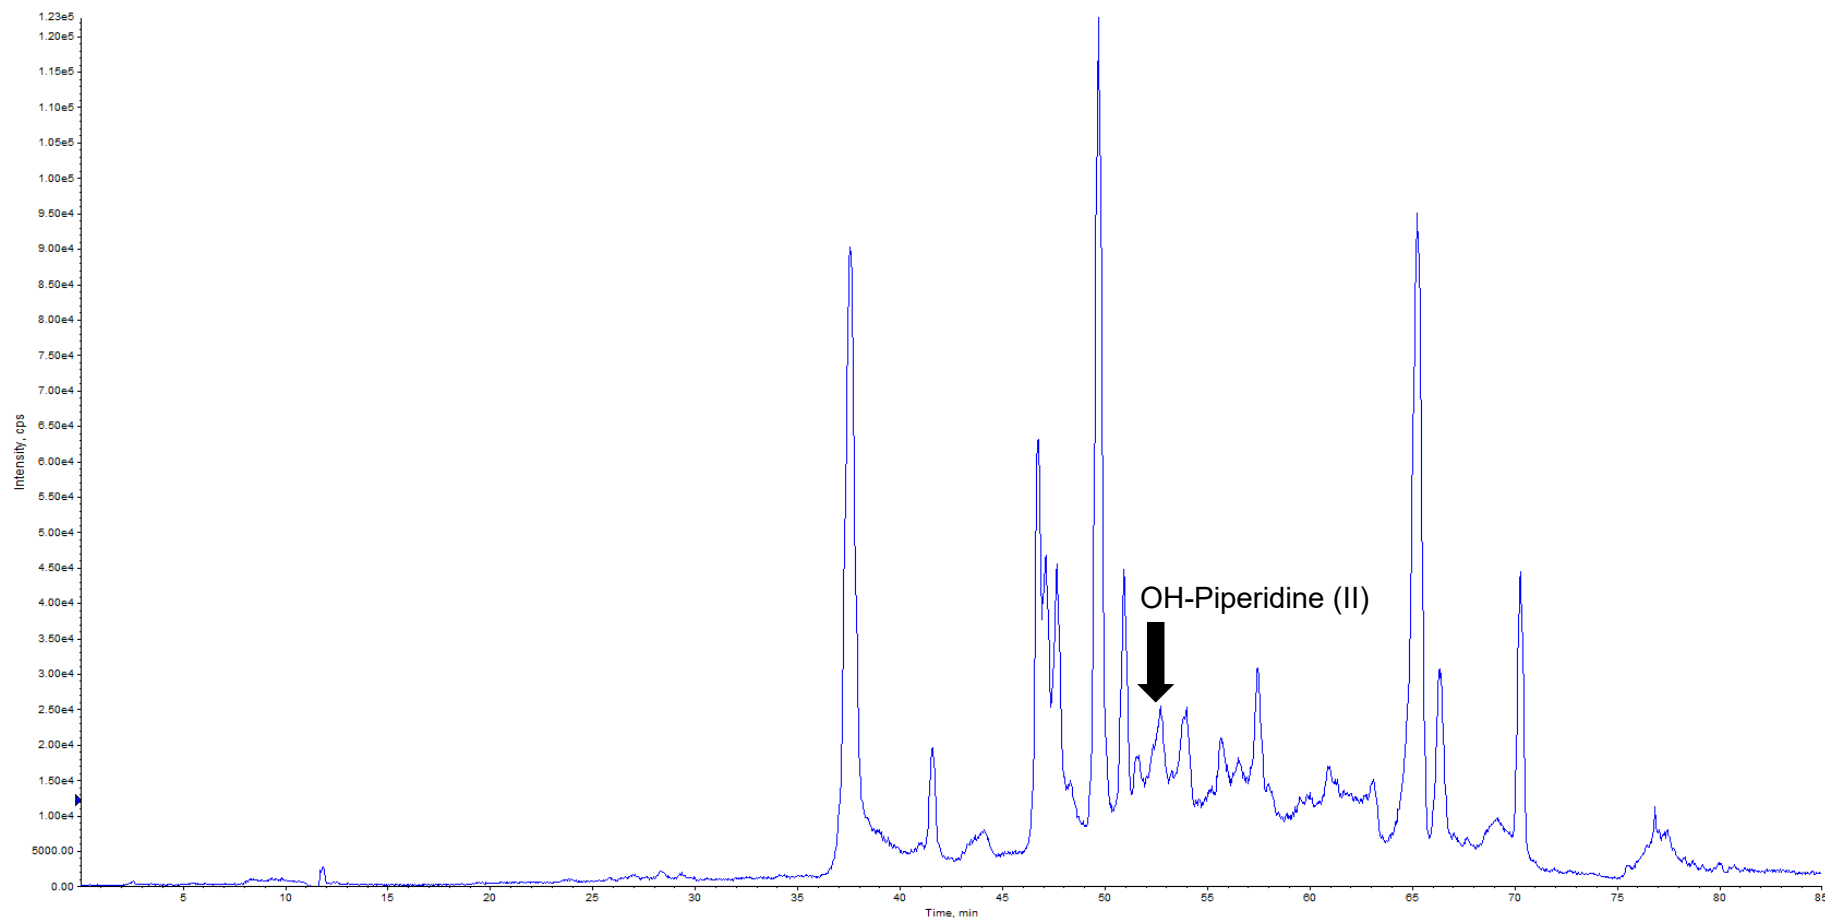

# Mass Spectrum of 3/4/5/6-Hydroxy Piperidine Zotarolimus (II)

CE = 75 eV, DP = 125 V

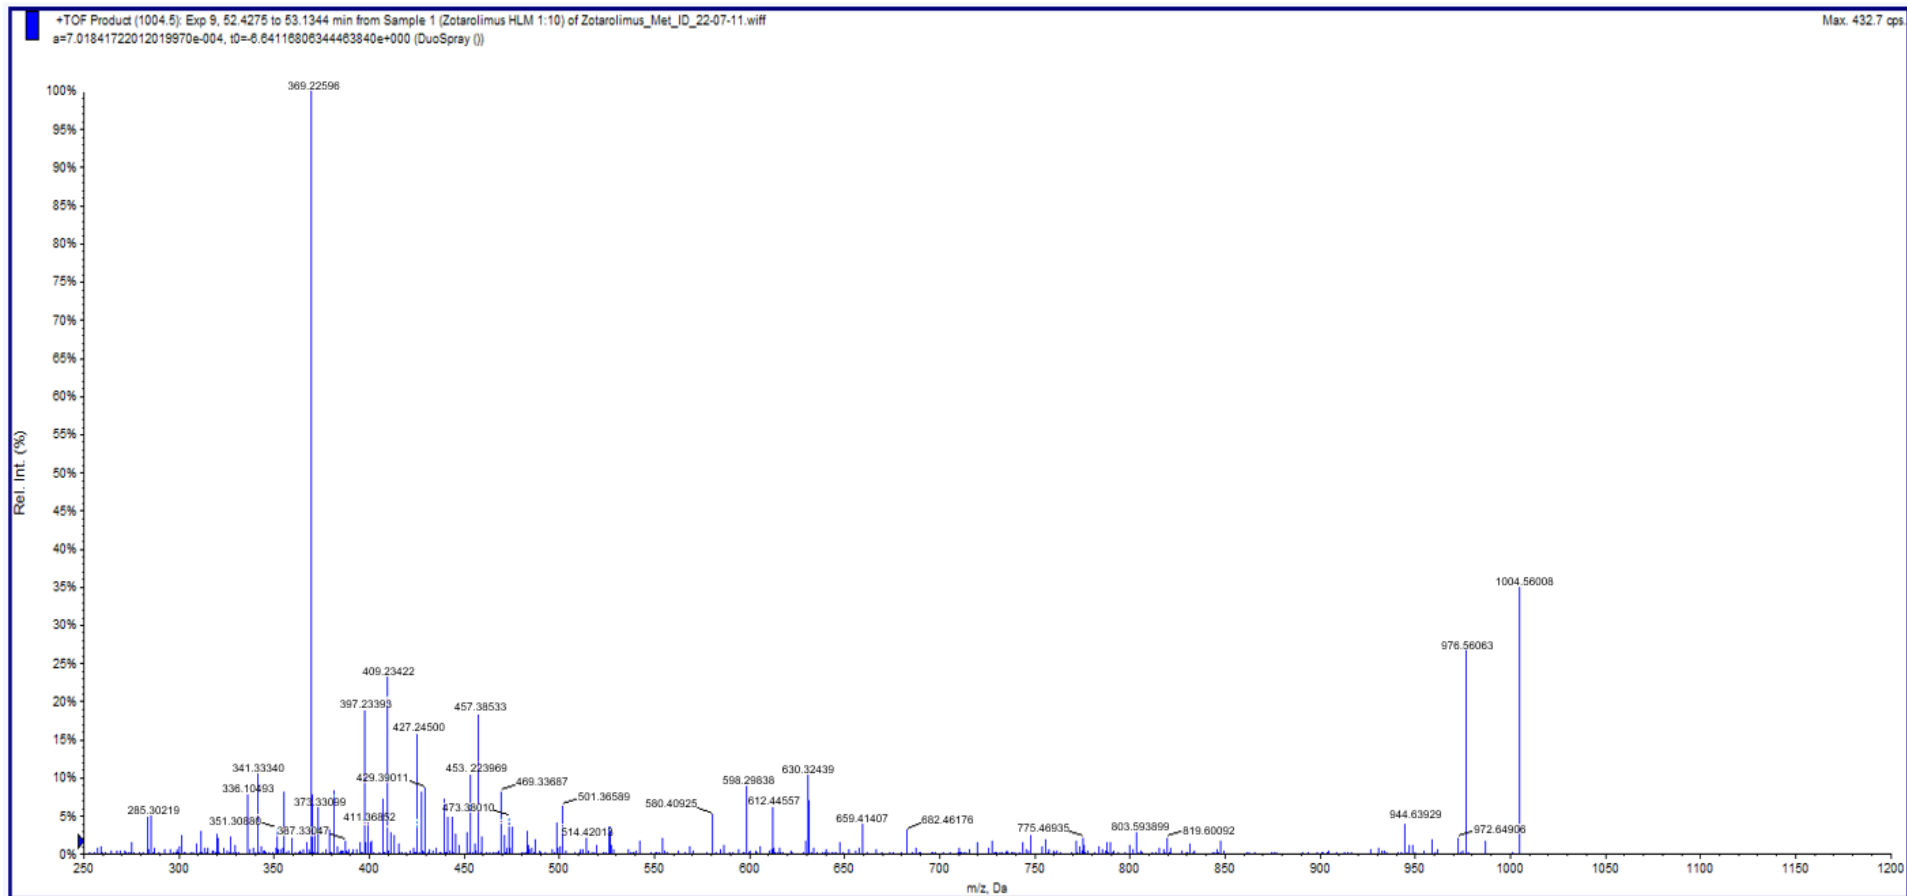

## $\Delta$ ppm of Hydroxy-Piperidine (II) Zotarolimus Fragments

---

| Fragment No. | Theoretical mass | Measured mass | $\Delta$ ppm |
|--------------|------------------|---------------|--------------|
| 1            | 336.10537        | 336.10493     | 1.3          |
| 2            | 369.22610        | 369.22596     | 0.4          |
| 3            | 381.24002        | 381.23885     | 3.1          |
| 4            | 397.23493        | 397.23393     | 2.5          |
| 5            | 409.23493        | 409.23422     | 1.7          |
| 6            | 427.24550        | 427.24500     | 1.2          |
| 7            | 441.26115        | 441.26092     | 0.5          |
| 8            | 453.22476        | 453.22369     | 2.4          |
| 9            | 598.29865        | 598.29838     | 0.5          |
| 10           | 630.32487        | 630.32439     | 0.8          |
| 11           | 659.41429        | 659.41407     | 0.3          |
| 12           | 710.33716        | 710.33699     | 0.2          |
| 13           | 783.46672        | 783.46637     | 0.4          |
| 14           | 815.49294        | 815.49103     | 2.3          |
| 15           | 1004.55666       | 1004.56008    | -3.4         |

---





# Structural Confirmation of Hydroxy Piperidine (II) Zotarolimus, m/z = 1004.55666

| Zotarolimus Fragments    | Pip-OH (II) Zotarolimus Fragments | Comments            |                                                             |
|--------------------------|-----------------------------------|---------------------|-------------------------------------------------------------|
| 320.11046                | 336.10493                         | +16) Hydroxylation  | 11-, 12-, 14-OH, or OH-piperidine present                   |
| 369.22610                | 369.22596                         | no hydroxylation    | Rules out 47, 48, and 49-OH                                 |
| 381.24002                | 381.23885                         | no hydroxylation    | Rules out 11, 12, 14, 23, 24, 25, 45, or 46-OH              |
| 397.23493                | 397.23393                         | no hydroxylation    | Rules out 11, 12, 14, 23, 24, 25, 45, or 46-OH              |
| 409.23493                | 409.23422                         | no hydroxylation    | Rules out 11, 12, 14, 23, 24, 25, 45, or 46-OH              |
| 441.26115                | 441.26092                         | no hydroxylation    | Rules out 11, 12, 14, 23, 24, 25, 45, or 46-OH              |
| 453.22476                | 453.22369                         | no hydroxylation    | Rules out 11, 12, 14, 23, 24, 25, 45, or 46-OH              |
| 582.30374                | 598.29838                         | +16) Hydroxylation  | 11, 12, 14, 23, 24, 25, 45, 46-OH, or piperidine-OH present |
| 614.32995                | 630.32439                         | +16) Hydroxylation  | 11, 12, 14, 23, 24, 25, 45, 46-OH, or piperidine-OH present |
| 659.41429                | 659.41407                         | no hydroxylation    | Rules out 23, 24, 25, 45, 46, 47, 48, or 49-OH              |
| 694.34225                | 710.33699                         | (+16) Hydroxylation | 11, 12, 14, 47, 48, 49, or Pip-OH present                   |
| 783.46672                | 783.46637                         | no hydroxylation    | Rules out 11, 12, 14, 23, 24, 25, 45, 46, 47, 48, or 49-OH  |
| 815.49294                | 815.49103                         | no hydroxylation    | Rules out 11, 12, 14, 23, 24, 25, 45, 46, 47, 48, or 49-OH  |
| 988.56174                | 1004.56008                        | +16) Hydroxylation  |                                                             |
| Characteristic Fragments |                                   |                     | 336                                                         |
| Determinant patterns     |                                   |                     |                                                             |

## Hydroxy-Piperidine Zotarolimus (III), $m/z = 1004.55666$

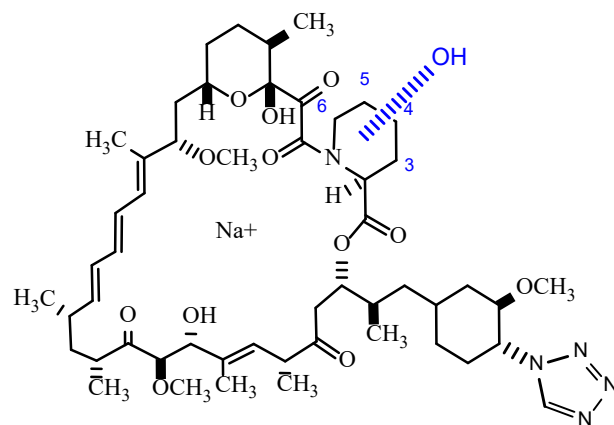

# 3/4/5/6-Hydroxy Piperidine Zotarolimus (III), $m/z = 1004.55666$ Extracted Ion Chromatogram (EIC)

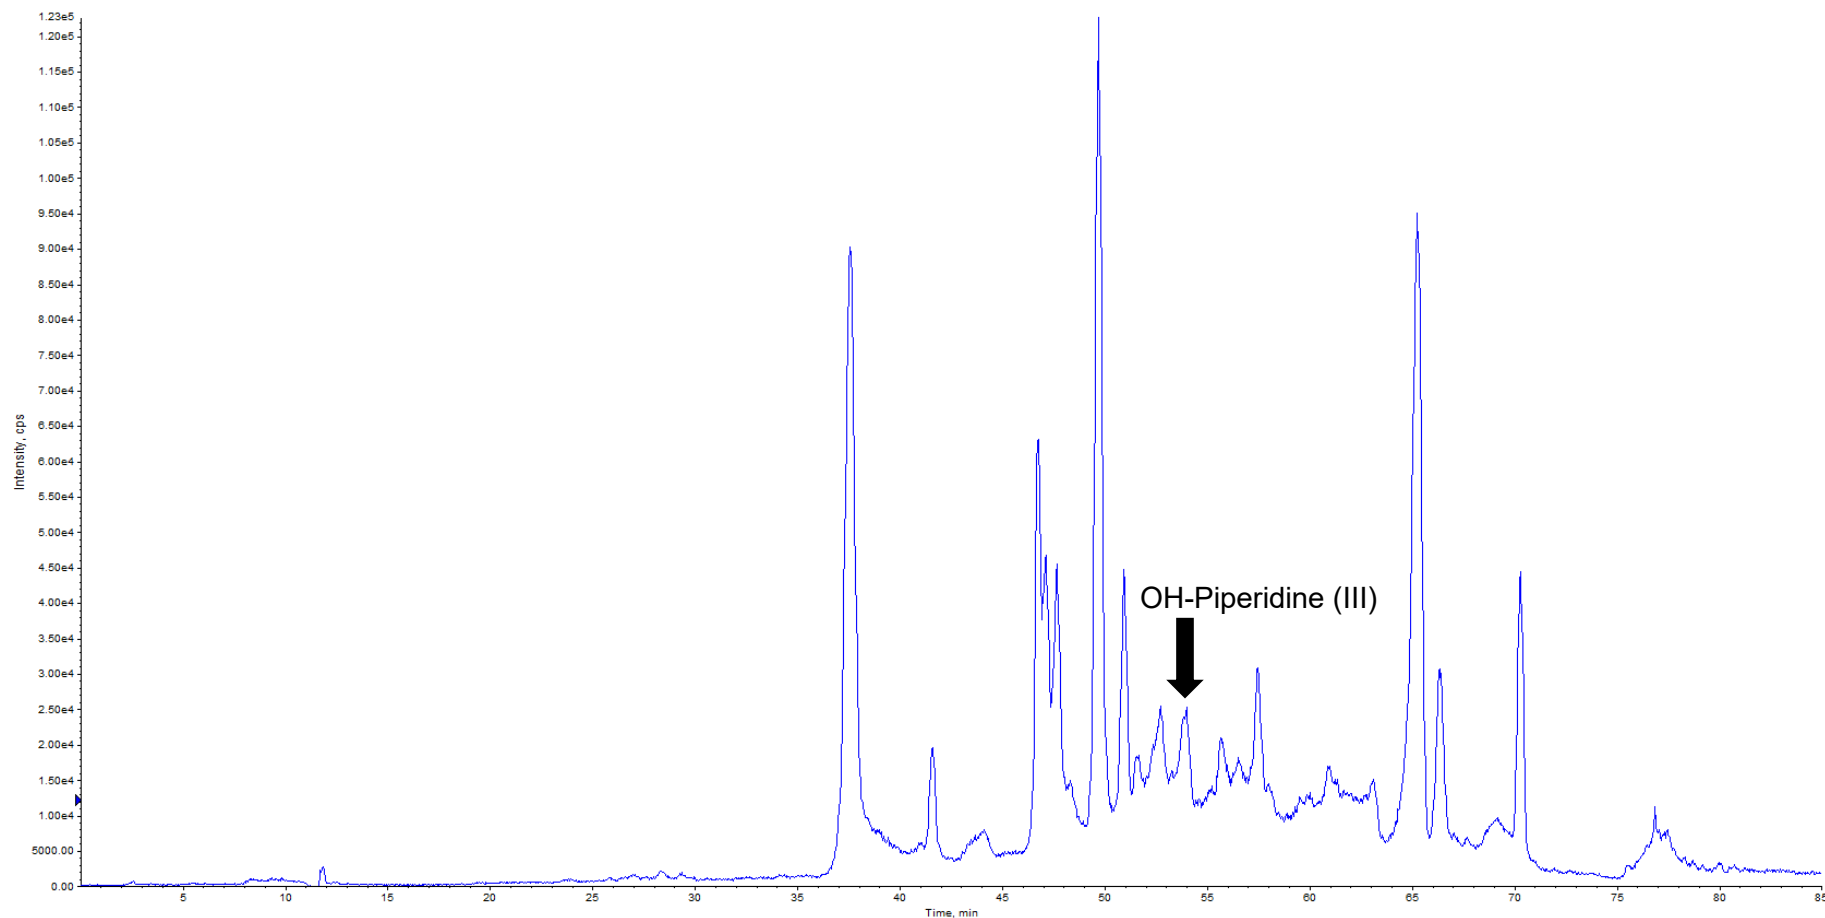

# Mass Spectrum of 3/4/5/6-Hydroxy Piperidine Zotarolimus (III)

CE = 75 eV, DP = 125 V

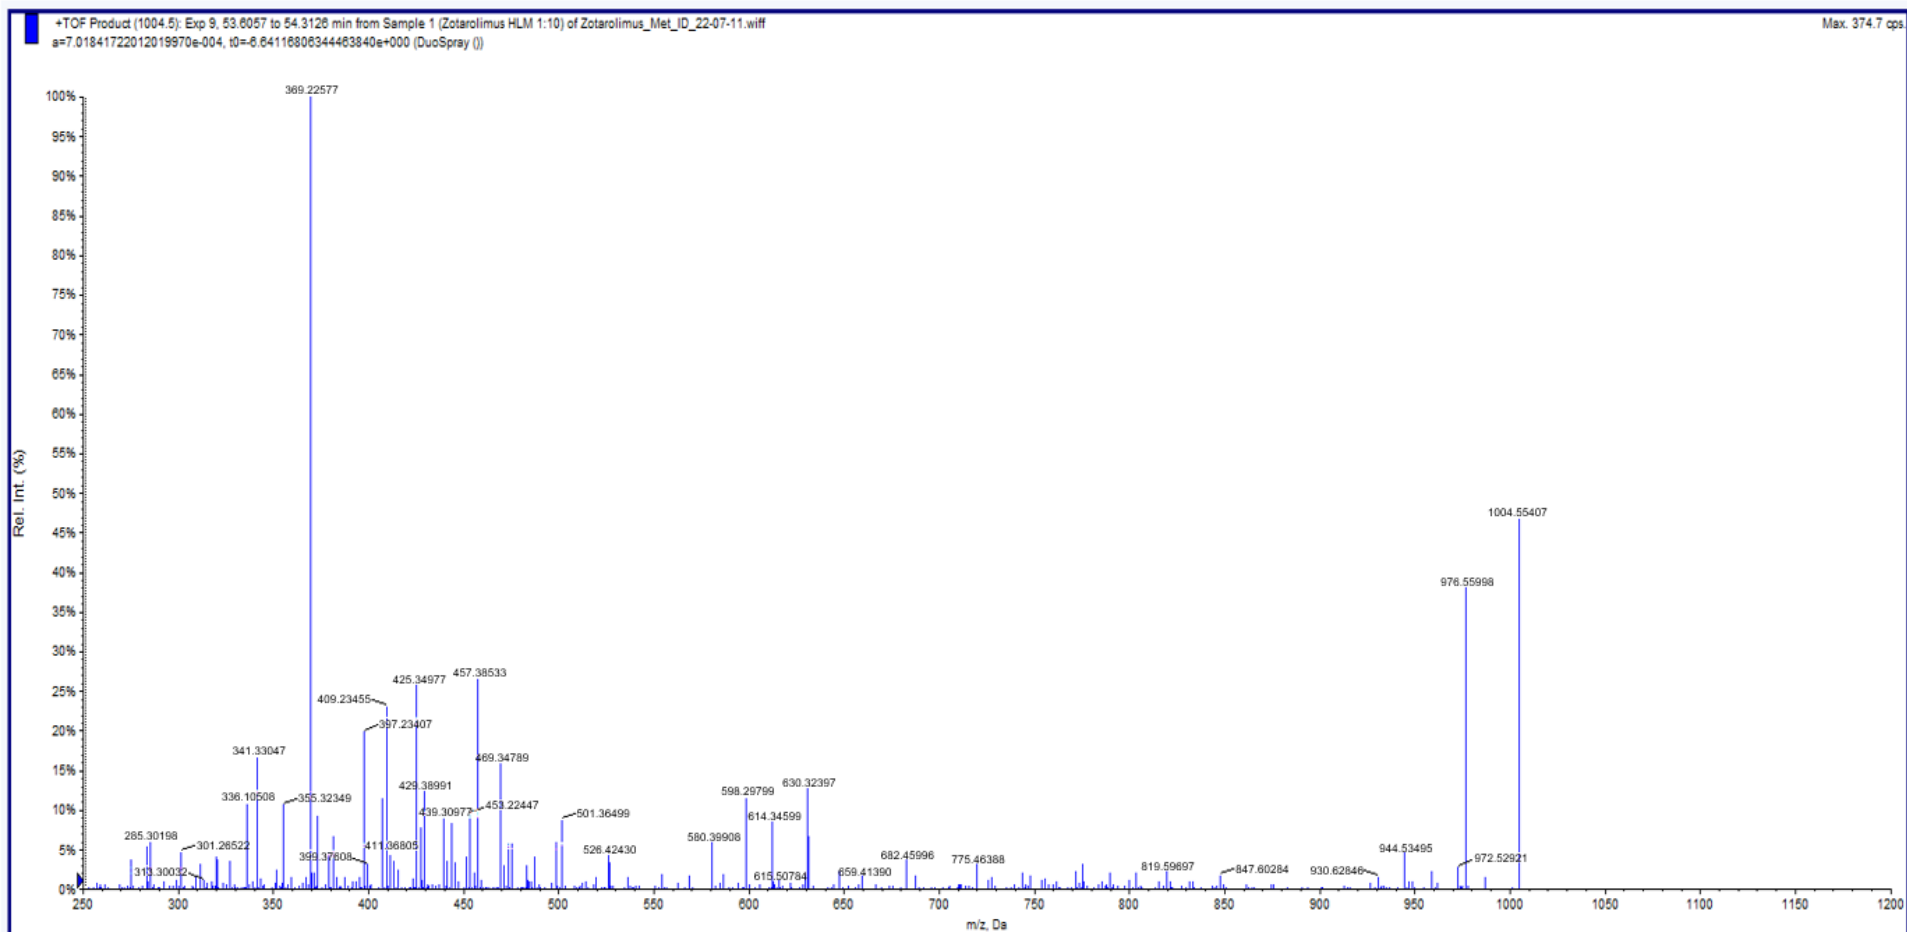

## $\Delta$ ppm of Hydroxy-Piperidine (III) Zotarolimus Fragments

---

| Fragment No. | theoretical mass | measured mass | $\Delta$ ppm |
|--------------|------------------|---------------|--------------|
| 1            | 336.10537        | 336.10508     | 0.9          |
| 2            | 369.22610        | 369.22577     | 0.9          |
| 3            | 381.24002        | 381.23907     | 2.5          |
| 4            | 397.23493        | 397.23407     | 2.2          |
| 5            | 409.23493        | 409.23455     | 0.9          |
| 6            | 441.26115        | 441.26089     | 0.6          |
| 7            | 453.22476        | 453.22447     | 0.6          |
| 8            | 598.29865        | 598.29799     | 1.1          |
| 9            | 630.32487        | 630.32397     | 1.4          |
| 10           | 659.41429        | 659.41390     | 0.6          |
| 11           | 710.33716        | 710.33469     | 3.5          |
| 12           | 783.46672        | 783.46598     | 0.9          |
| 13           | 815.49294        | 815.49193     | 1.2          |
| 14           | 1004.55666       | 1004.55407    | 2.6          |



# Structural Confirmation of Hydroxy Piperidine (III) Zotarolimus, m/z = 1004.55666

| Zotarolimus Fragments    | Pip-OH (III) Zotarolimus Fragments | Comments            |                                                             |
|--------------------------|------------------------------------|---------------------|-------------------------------------------------------------|
| 320.11046                | 336.10508                          | +16) Hydroxylation  | 11-, 12-, 14-OH, or OH-piperidine present                   |
| 369.22610                | 369.22577                          | no hydroxylation    | Rules out 47, 48, and 49-OH                                 |
| 381.24002                | 381.23907                          | no hydroxylation    | Rules out 11, 12, 14, 23, 24, 25, 45, or 46-OH              |
| 397.23493                | 397.23407                          | no hydroxylation    | Rules out 11, 12, 14, 23, 24, 25, 45, or 46-OH              |
| 409.23493                | 409.23455                          | no hydroxylation    | Rules out 11, 12, 14, 23, 24, 25, 45, or 46-OH              |
| 441.26115                | 441.26089                          | no hydroxylation    | Rules out 11, 12, 14, 23, 24, 25, 45, or 46-OH              |
| 453.22476                | 453.22447                          | no hydroxylation    | Rules out 11, 12, 14, 23, 24, 25, 45, or 46-OH              |
| 582.30374                | 598.29799                          | +16) Hydroxylation  | 11, 12, 14, 23, 24, 25, 45, 46-OH, or piperidine-OH present |
| 614.32995                | 630.32397                          | +16) Hydroxylation  | 11, 12, 14, 23, 24, 25, 45, 46-OH, or piperidine-OH present |
| 659.41429                | 659.41390                          | no hydroxylation    | Rules out 23, 24, 25, 45, 46, 47, 48, or 49-OH              |
| 694.34225                | 710.33469                          | (+16) Hydroxylation | 11, 12, 14, 47, 48, 49, or Pip-OH present                   |
| 783.46672                | 783.46598                          | no hydroxylation    | Rules out 11, 12, 14, 23, 24, 25, 45, 46, 47, 48, or 49-OH  |
| 815.49294                | 815.49193                          | no hydroxylation    | Rules out 11, 12, 14, 23, 24, 25, 45, 46, 47, 48, or 49-OH  |
| 988.56174                | 1004.55407                         | +16) Hydroxylation  |                                                             |
| Characteristic Fragments |                                    |                     | 336                                                         |
| Determinant patterns     |                                    |                     |                                                             |

# Hydroxy-Piperidine Zotarolimus (IV), $m/z = 1004.55666$





# 3/4/5/6-Hydroxy Piperidine Zotarolimus (IV), $m/z = 1004.55666$ Extracted Ion Chromatogram (EIC)

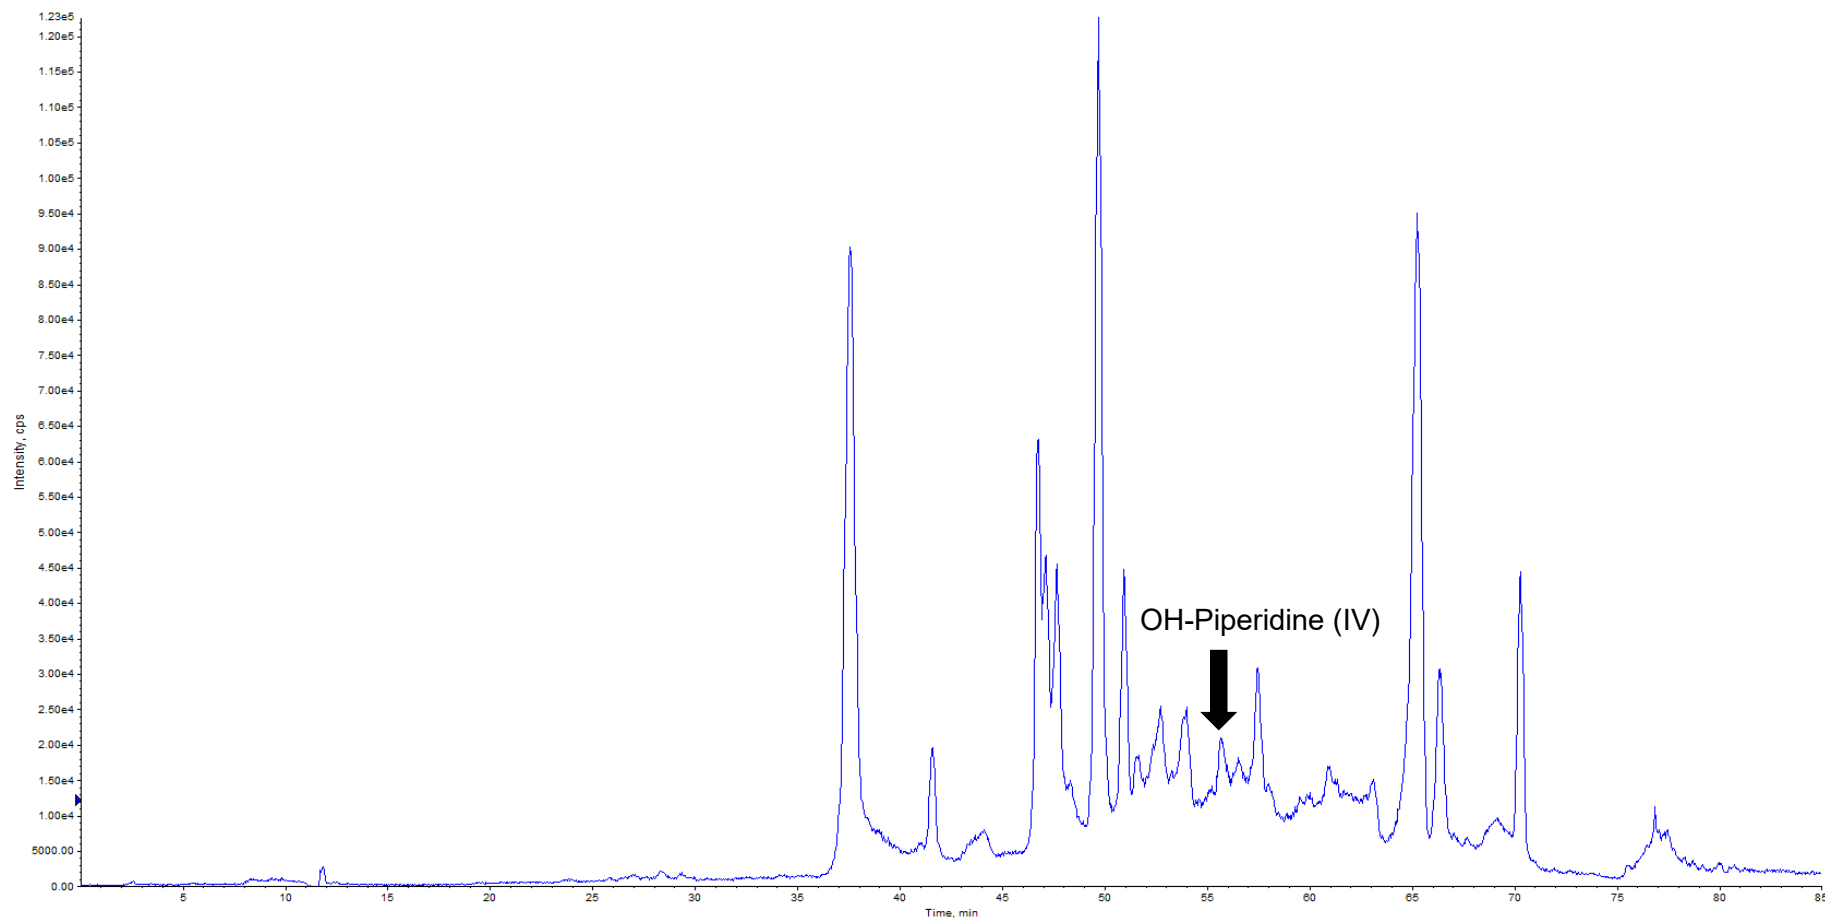

# Mass Spectrum of 3/4/5/6-Hydroxy Piperidine Zotarolimus (IV)

CE = 75 eV, DP = 125 V

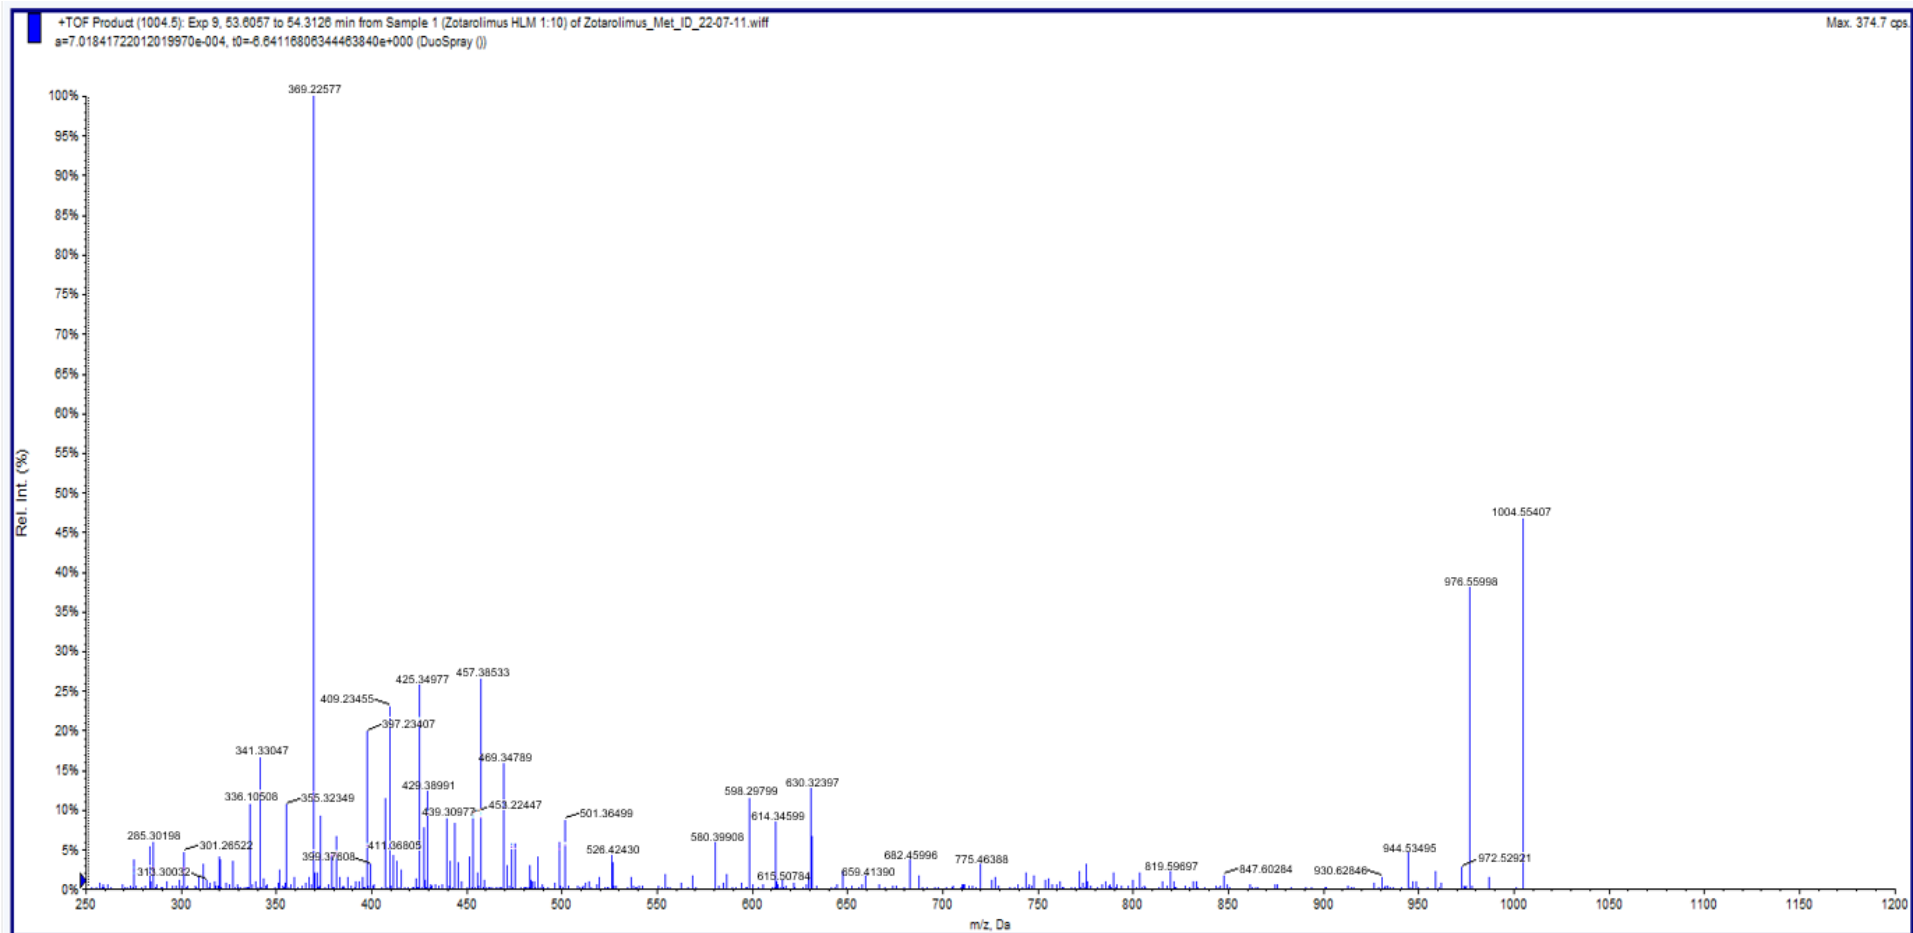

## $\Delta$ ppm of Hydroxy-Piperidine (IV) Zotarolimus Fragments

---

| Fragment No. | theoretical mass | measured mass | $\Delta$ ppm |
|--------------|------------------|---------------|--------------|
| 1            | 336.10537        | 336.10499     | 1.1          |
| 2            | 369.22610        | 369.22599     | 0.3          |
| 3            | 381.24002        | 381.23990     | 0.3          |
| 4            | 397.23493        | 397.23463     | 0.8          |
| 5            | 409.23493        | 409.23487     | 0.1          |
| 6            | 441.26115        | 441.26068     | 1.1          |
| 7            | 453.22476        | 453.22403     | 1.6          |
| 8            | 598.29865        | 598.29809     | 0.9          |
| 9            | 630.32487        | 630.32470     | 0.3          |
| 10           | 659.41429        | 659.41400     | 0.4          |
| 11           | 710.33716        | 710.33670     | 0.6          |
| 12           | 783.46672        | 783.46603     | 0.9          |
| 13           | 815.49294        | 815.49218     | 0.9          |
| 14           | 1004.55666       | 1004.55599    | 0.7          |

## 3/4/5/6-Hydroxy Piperidine Zotarolimus, m/z = 1004.55666

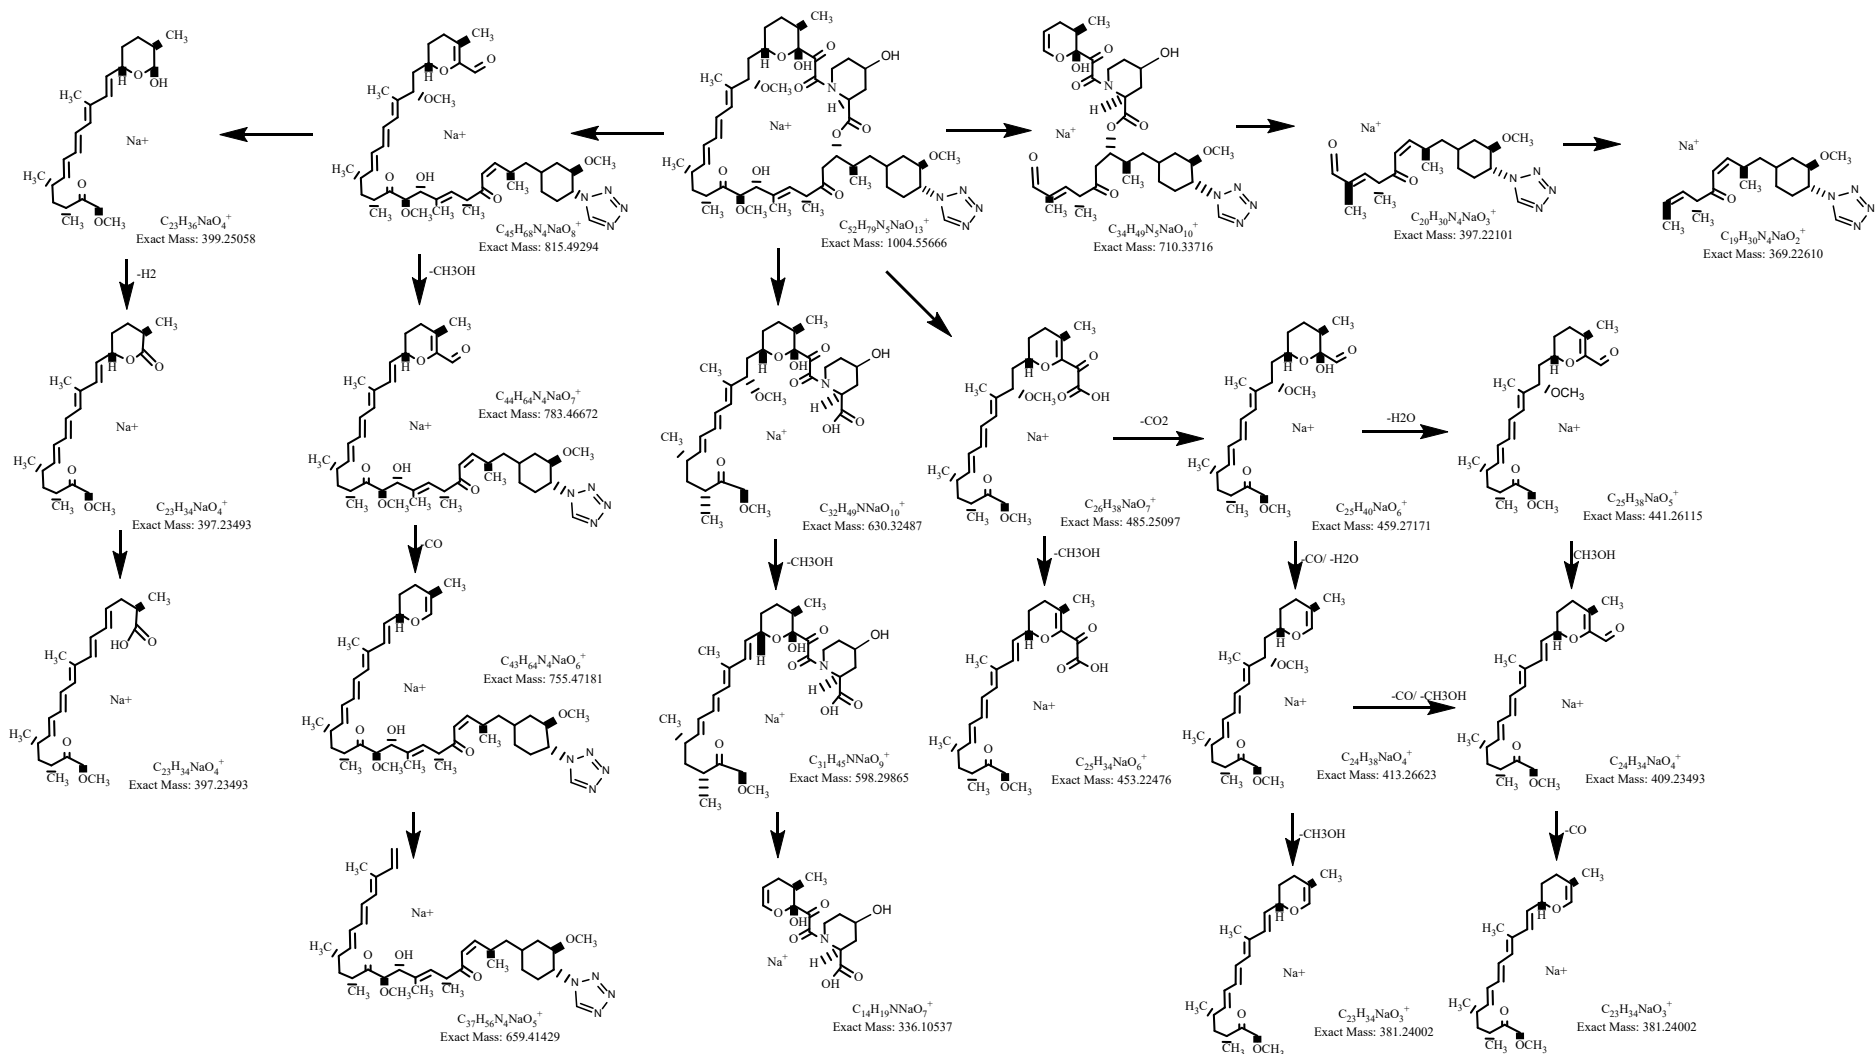

## Structural Confirmation of Hydroxy Piperidine (IV) Zotarolimus, m/z = 1004.55666

---

| Zotarolimus Fragments    | Pip-OH (IV) Zotarolimus Fragments | Comments            |                                                             |
|--------------------------|-----------------------------------|---------------------|-------------------------------------------------------------|
| 369.22610                | 336.10499                         | +16) Hydroxylation  | 11-, 12-, 14-OH, or OH-piperidine present                   |
| 381.24002                | 369.22599                         | no hydroxylation    | Rules out 47, 48, and 49-OH                                 |
| 397.23493                | 381.23990                         | no hydroxylation    | Rules out 11, 12, 14, 23, 24, 25, 45, or 46-OH              |
| 409.23493                | 397.23463                         | no hydroxylation    | Rules out 11, 12, 14, 23, 24, 25, 45, or 46-OH              |
| 441.26115                | 409.23487                         | no hydroxylation    | Rules out 11, 12, 14, 23, 24, 25, 45, or 46-OH              |
| 453.22476                | 441.26068                         | no hydroxylation    | Rules out 11, 12, 14, 23, 24, 25, 45, or 46-OH              |
| 582.30374                | 453.22403                         | no hydroxylation    | Rules out 11, 12, 14, 23, 24, 25, 45, or 46-OH              |
| 614.32995                | 598.29809                         | +16) Hydroxylation  | 11, 12, 14, 23, 24, 25, 45, 46-OH, or piperidine-OH present |
| 659.41429                | 630.32470                         | +16) Hydroxylation  | 11, 12, 14, 23, 24, 25, 45, 46-OH, or piperidine-OH present |
| 694.34225                | 659.41400                         | no hydroxylation    | Rules out 23, 24, 25, 45, 46, 47, 48, or 49-OH              |
| 783.46672                | 710.33670                         | (+16) Hydroxylation | 11, 12, 14, 47, 48, 49, or Pip-OH present                   |
| 815.49294                | 783.46603                         | no hydroxylation    | Rules out 11, 12, 14, 23, 24, 25, 45, 46, 47, 48, or 49-OH  |
| 988.56174                | 815.49218                         | no hydroxylation    | Rules out 11, 12, 14, 23, 24, 25, 45, 46, 47, 48, or 49-OH  |
| Characteristic Fragments |                                   |                     | 336.10499                                                   |
| Determinant patterns     |                                   |                     |                                                             |

---

## 23-Hydroxy Zotarolimus, m/z = 1004.55666

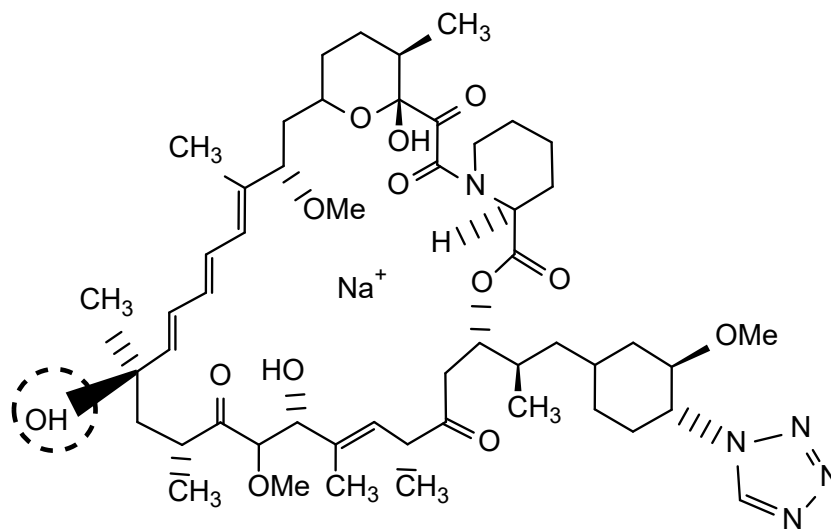

Chemical Formula: C<sub>52</sub>H<sub>79</sub>N<sub>5</sub>NaO<sub>13</sub><sup>+</sup>

Exact Mass: 1004.55666

23-hydroxy zotarolimus

# 23-Hydroxy Zotarolimus, $m/z = 1004.55666$ Extracted Ion Chromatogram (EIC)

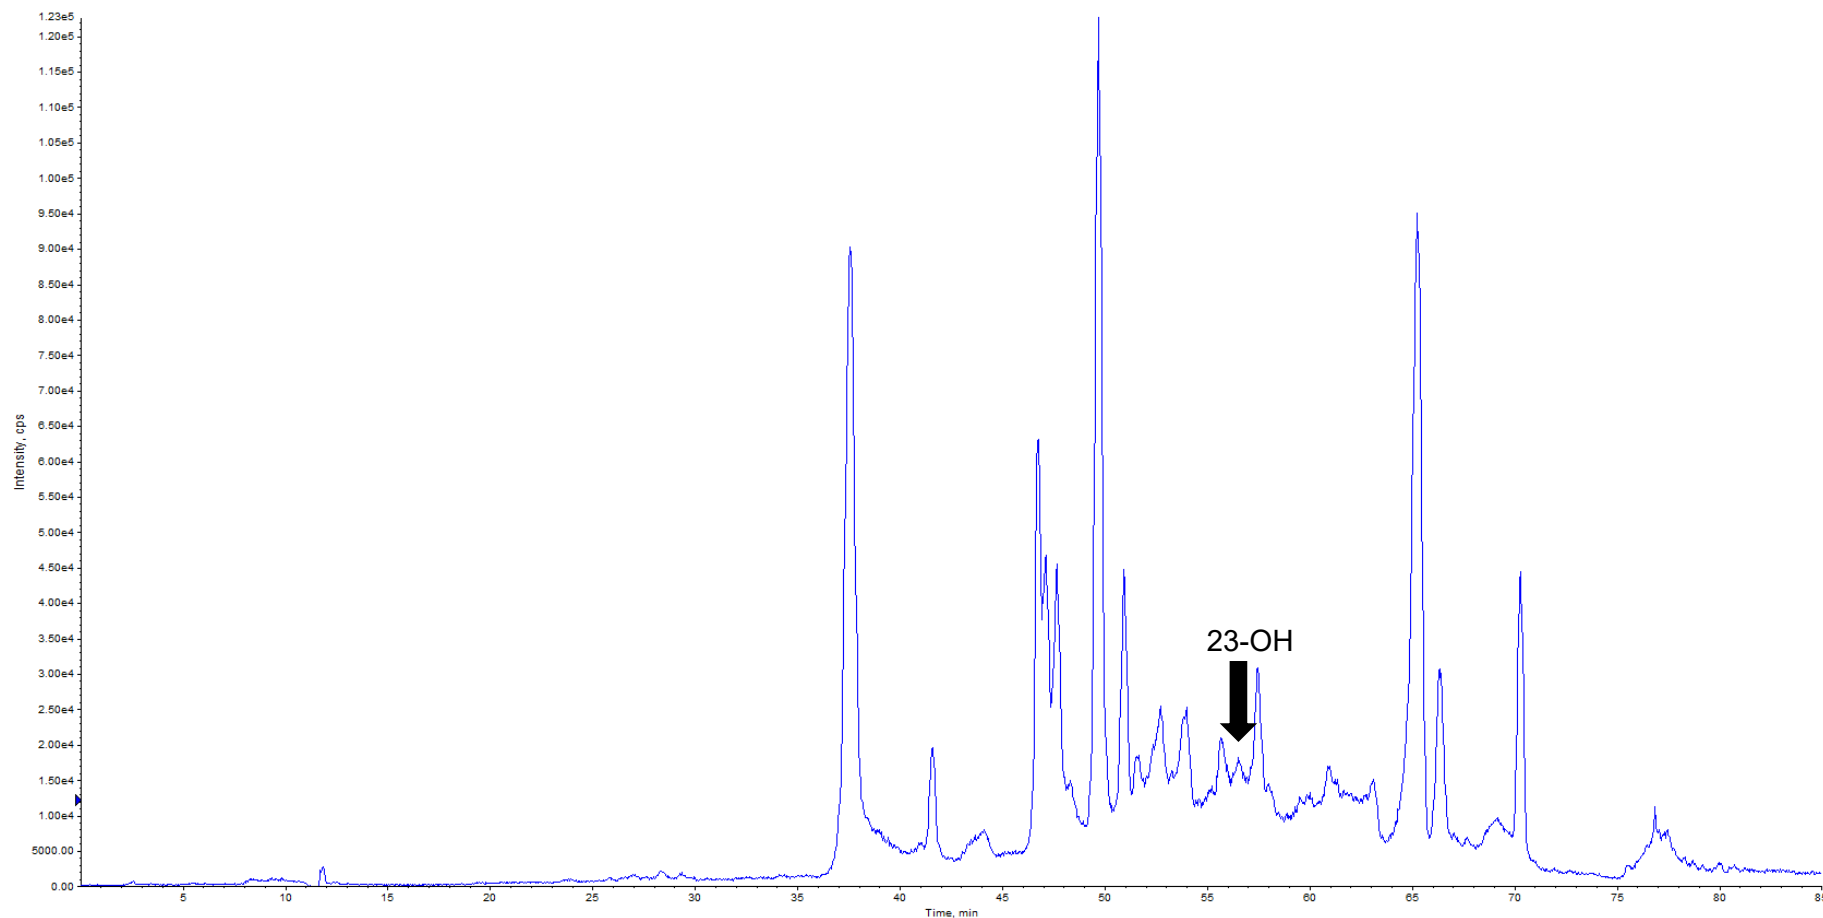

# Mass Spectrum of 23-Hydroxy Zotarolimus

CE = 75 eV, DP = 125 V

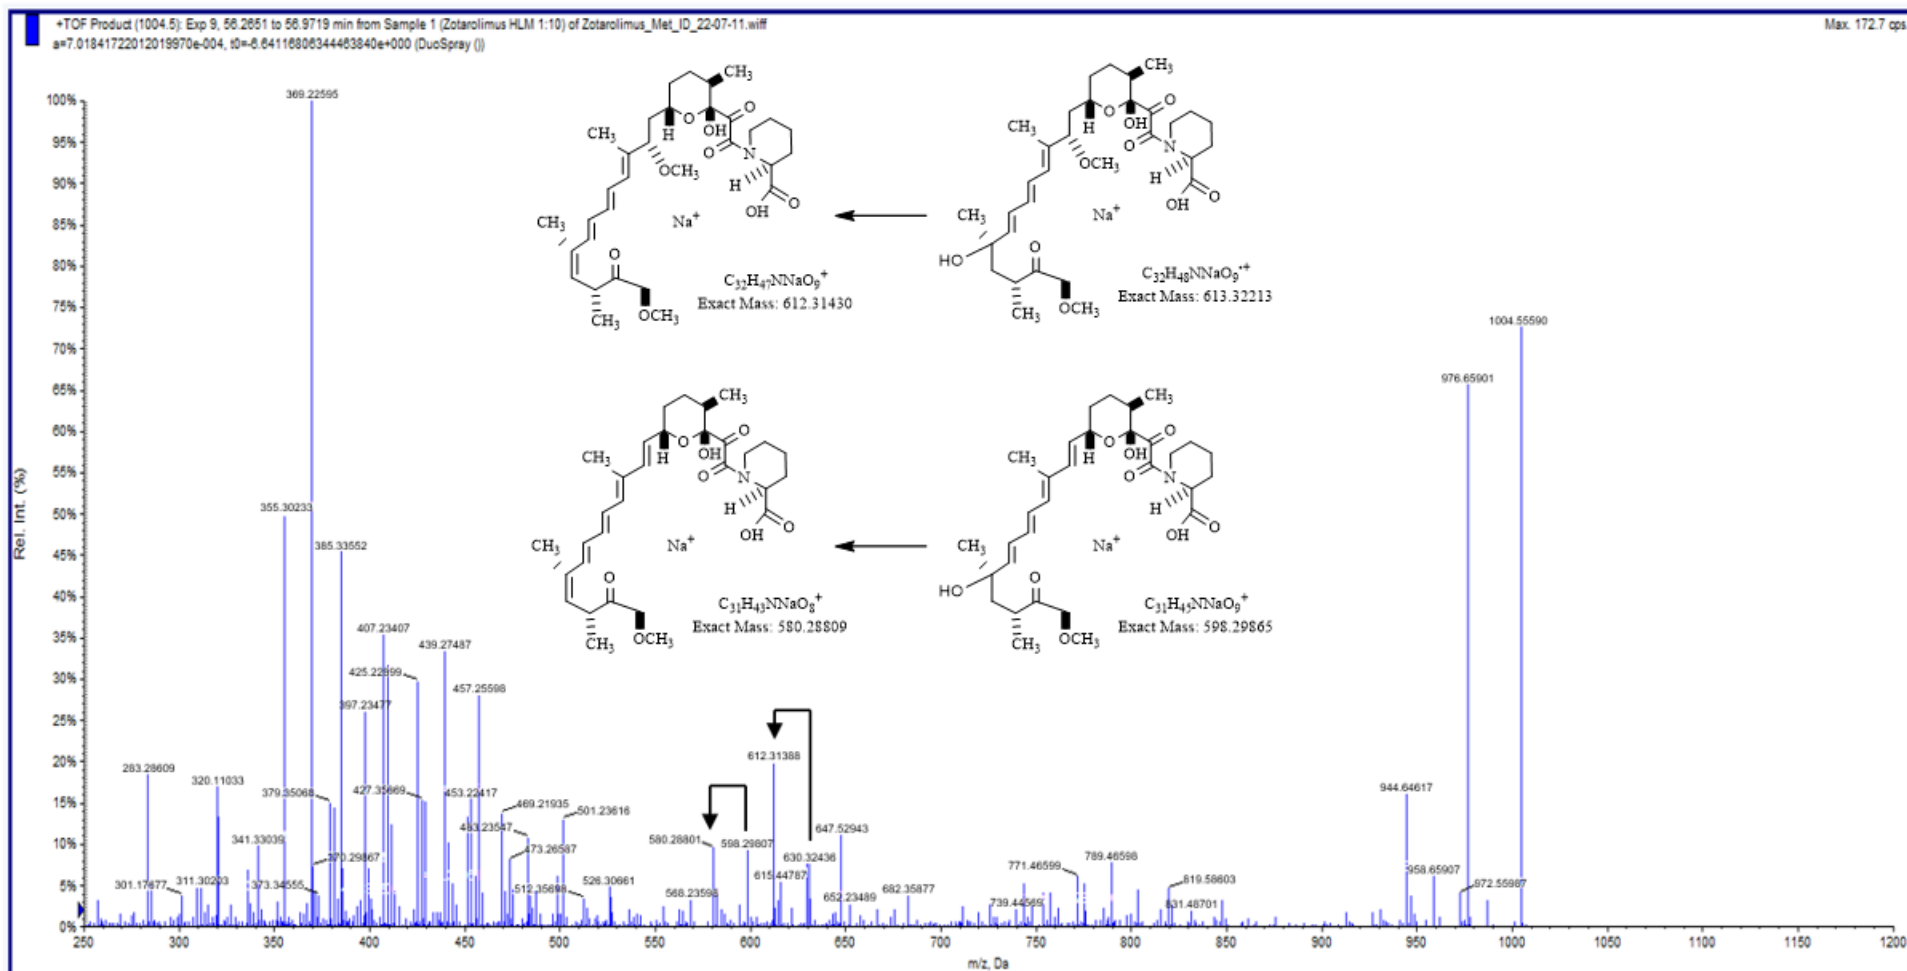



## $\Delta$ ppm of 23-Hydroxy Zotarolimus Fragments

---

| Fragment No. | theoretical mass | measured mass | $\Delta$ ppm |
|--------------|------------------|---------------|--------------|
| 1            | 320.11046        | 320.11033     | 0.4          |
| 2            | 369.22610        | 369.22595     | 0.4          |
| 3            | 397.23493        | 397.23477     | 0.4          |
| 4            | 413.22985        | 413.22937     | 1.2          |
| 5            | 425.22985        | 425.22899     | 2.0          |
| 6            | 441.26115        | 441.26103     | 0.3          |
| 7            | 457.25606        | 457.25598     | 0.2          |
| 8            | 469.21967        | 469.21935     | 0.7          |
| 9            | 598.29865        | 598.29807     | 1.0          |
| 10           | 630.32487        | 630.32436     | 0.8          |
| 11           | 675.40921        | 675.40899     | 0.3          |
| 12           | 694.34225        | ND            | ND           |
| 13           | 771.46672        | 771.46599     | 0.9          |
| 14           | 831.48785        | 831.48701     | 1.0          |
| 15           | 1004.55666       | 1004.5559     | 0.8          |

# 23-Hydroxy Zotarolimus, m/z = 1004.55666

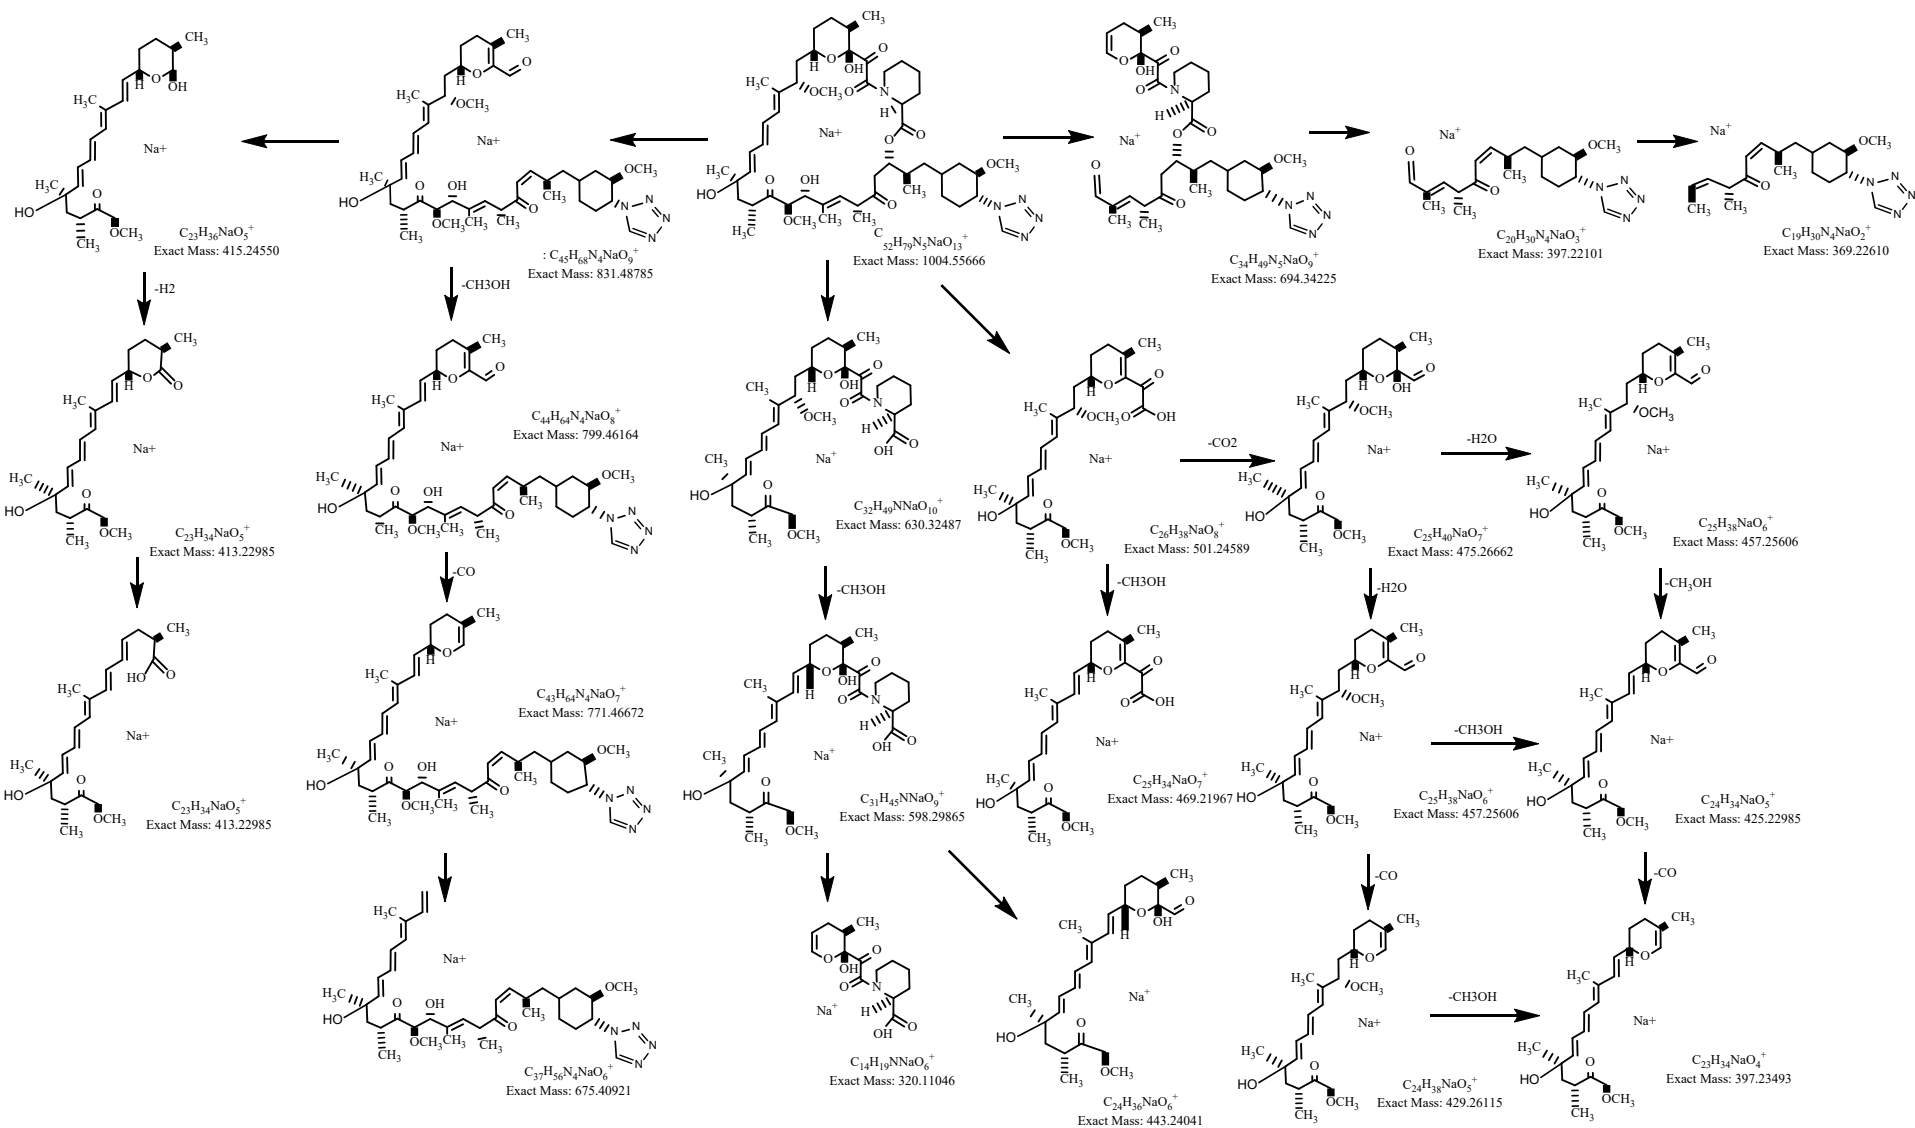

## Structural Confirmation of 23-Hydroxy Zotarolimus, m/z = 1004.55666

| Zotarolimus Fragments    | 23-Hydroxy Zotarolimus Fragments | Comments            |                                                                                                                                                         |
|--------------------------|----------------------------------|---------------------|---------------------------------------------------------------------------------------------------------------------------------------------------------|
| 320.11046                | 320.11033                        | no hydroxylation    | Rules out OH-piperidine, 11 and 12, and 14-OH                                                                                                           |
| 369.22610                | 369.22595                        | no hydroxylation    | Rules out 47, 48, and 49-OH                                                                                                                             |
| 381.24002                | 397.23477                        | (+16) Hydroxylation | 11, 12, 14, 23, 24, 25, 45, or 46-OH present                                                                                                            |
| 397.23493                | 397.23477                        | no hydroxylation    | Rules out 47, 48, and 49-OH                                                                                                                             |
| 409.23493                | 425.22899                        | (+16) Hydroxylation | 11, 12, 14, 23, 24, 25, 45, or 46-OH present                                                                                                            |
| 427.24550                | 443.24041                        | (+16) Hydroxylation | 11, 12, 14, 23, 24, 25, 45, or 46-OH present                                                                                                            |
| 441.26115                | 457.25598                        | (+16) Hydroxylation | 11, 12, 14, 23, 24, 25, 45, or 46-OH present                                                                                                            |
| 453.22476                | 469.21935                        | (+16) Hydroxylation | 11, 12, 14, 23, 24, 25, 45, or 46-OH present                                                                                                            |
| 582.30374                | 598.29807                        | (+16) Hydroxylation | 11, 12, 14, 23, 24, 25, 45, 46-OH, or piperidine-OH present                                                                                             |
| 614.32995                | 630.32436                        | (+16) Hydroxylation | 11, 12, 14, 23, 24, 25, 45, 46-OH, or piperidine-OH present                                                                                             |
| 659.41429                | 675.40899                        | (+16) Hydroxylation | Rules out OH-piperidine, 11, 12 and 14-OH                                                                                                               |
| 694.34225                | ND                               | no hydroxylation    | Rules out OH-piperidine, 11, 12, 14, 47, 48, and 49-OH                                                                                                  |
| 783.46672                | 799.46035                        | (+16) Hydroxylation | 11, 12, 14, 23, 24, 25, 45, 46, 47, 48, or 49-OH present                                                                                                |
| 815.49294                | 831.48701                        | (+16) Hydroxylation | 11, 12, 14, 23, 24, 25, 45, 46, 47, 48, or 49-OH present                                                                                                |
| 988.56174                | 1004.5559                        | (+16) Hydroxylation |                                                                                                                                                         |
| Characteristic Fragments | significant 598                  |                     | Characteristic fragment for water loss (630 -18 = 598 m/z) of 23 and 24-OH<br>Characteristic fragment for water loss (612-18 = 594 m/z) of 23 and 24-OH |
| Determinant patterns     | Water loss                       |                     | 23-OH metabolite elutes at same relative retention time as 23-OH identified from sirolimus and temsirolimus                                             |

## 49-Hydroxy Zotarolimus, m/z = 1004.55666

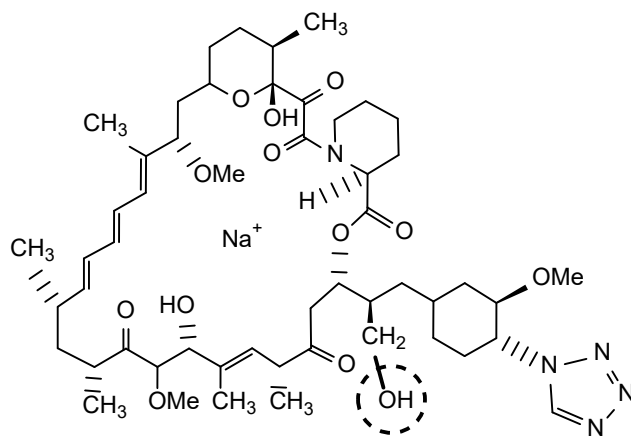

Chemical Formula: C<sub>52</sub>H<sub>79</sub>N<sub>5</sub>NaO<sub>13</sub><sup>+</sup>

Exact Mass: 1004.55666

49-hydroxy zotarolimus

# 49-Hydroxy Zotarolimus, $m/z = 1004.55666$ Extracted Ion Chromatogram (EIC)

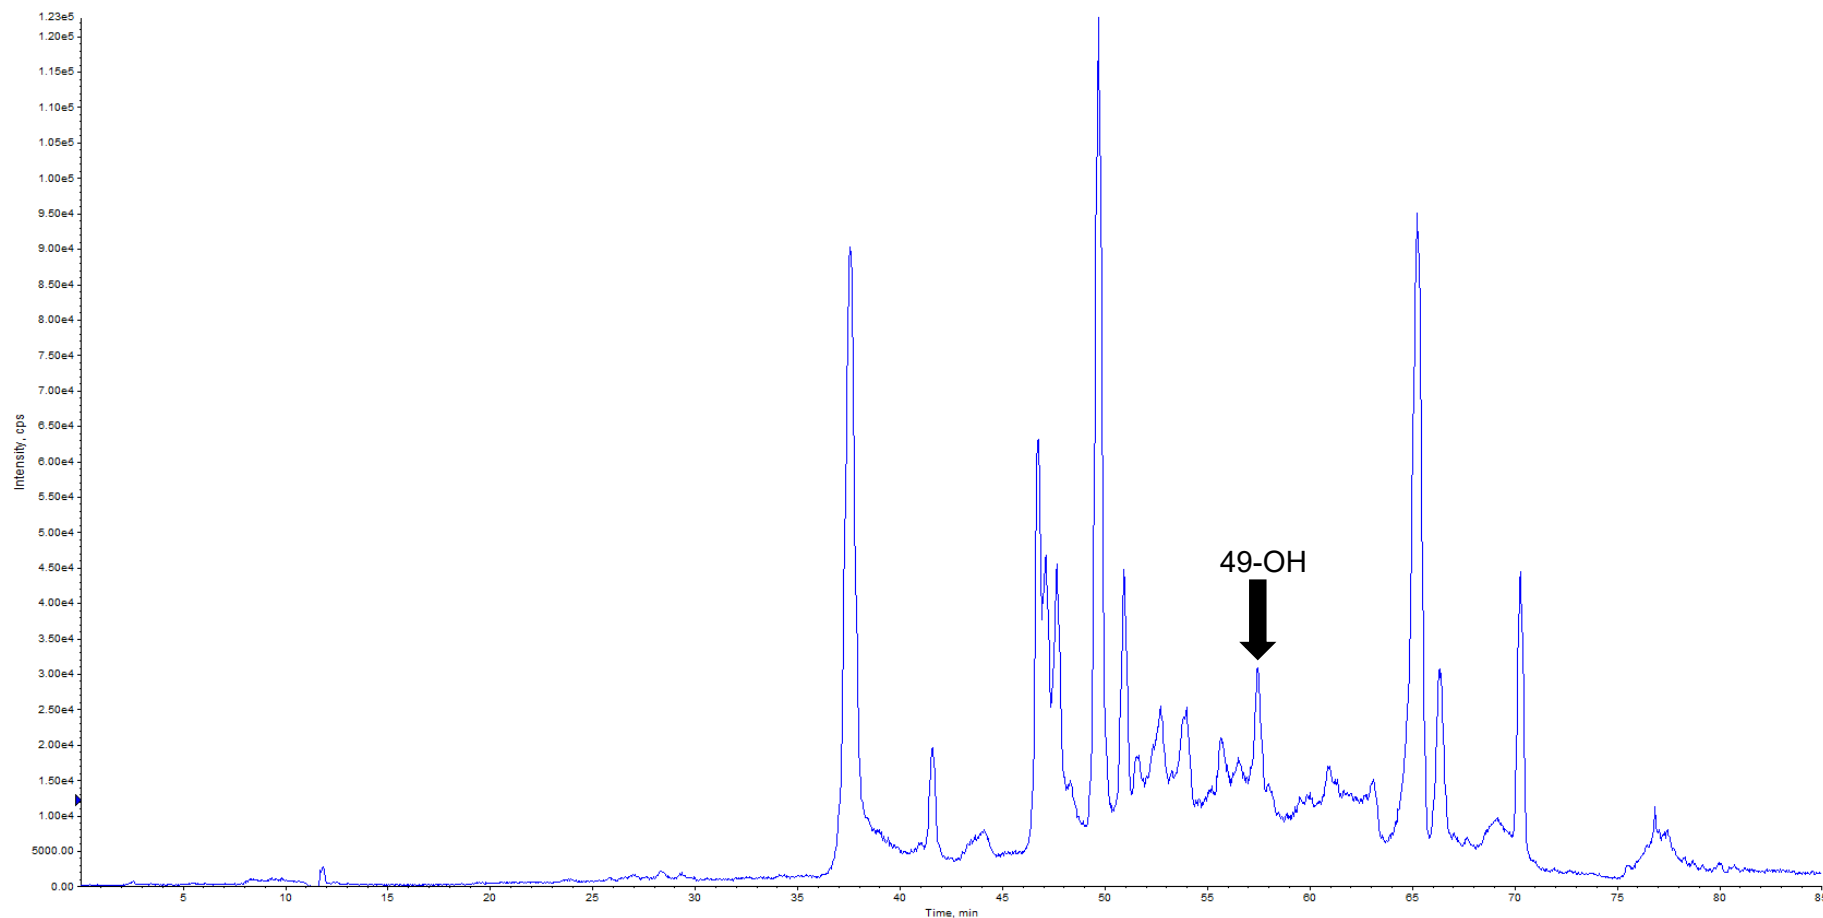

# Mass Spectrum of 49-Hydroxy Zotarolimus

CE = 75 eV, DP = 125 V

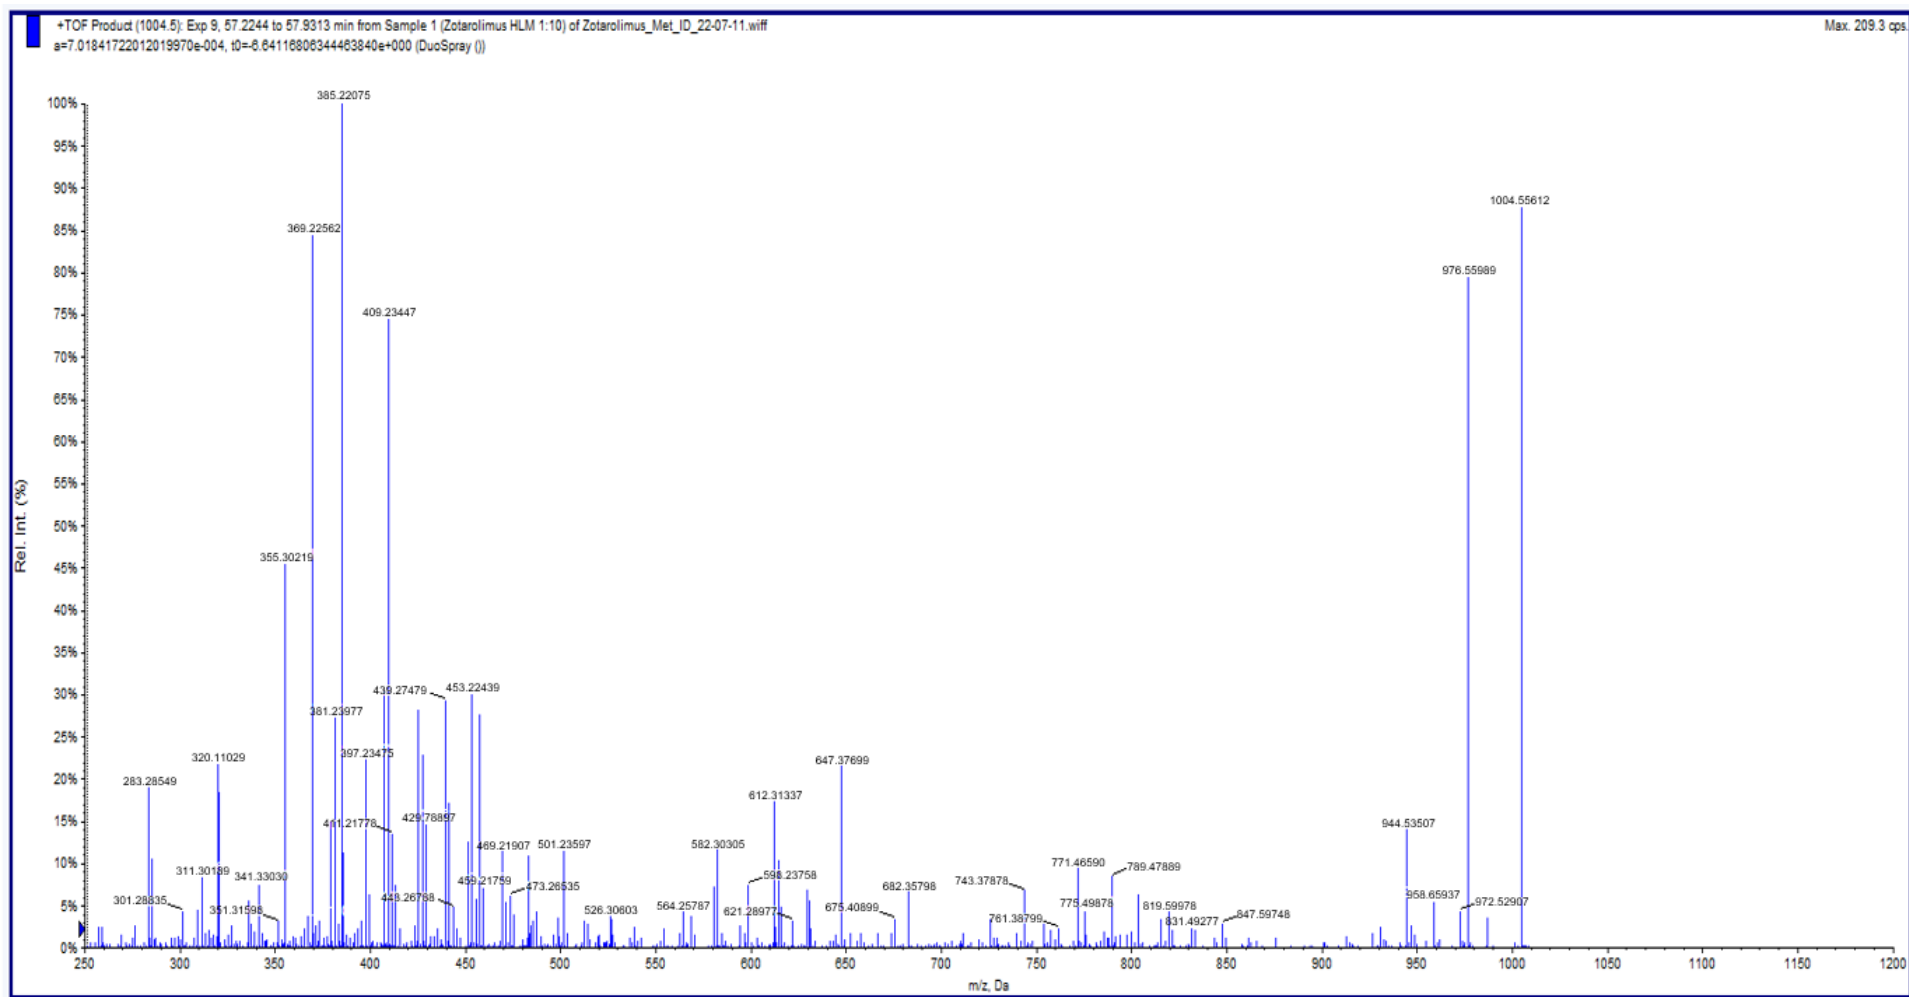

## Δppm of 49-Hydroxy Zotarolimus Fragments

---

| Fragment No. | theoretical mass | measured mass | Δppm |
|--------------|------------------|---------------|------|
| 1            | 320.11046        | 320.11029     | 0.5  |
| 2            | 381.24002        | 381.23977     | 0.7  |
| 3            | 397.23493        | 397.23475     | 0.5  |
| 4            | 409.23493        | 409.23447     | 1.1  |
| 5            | 441.26115        | 441.26073     | 1.0  |
| 6            | 453.22476        | 453.22439     | 0.8  |
| 7            | 582.30374        | 582.30305     | 1.2  |
| 8            | 614.32995        | 614.32937     | 0.9  |
| 9            | 647.37791        | 647.37699     | 1.4  |
| 10           | 675.40921        | 675.40899     | 0.3  |
| 11           | 771.46672        | 771.4659      | 1.1  |
| 12           | 831.48785        | 831.48727     | 0.7  |
| 13           | 1004.55666       | 1004.55612    | 0.5  |

| Characteristic<br>Fragment | theoretical mass | measured mass | Δppm |
|----------------------------|------------------|---------------|------|
|                            | 385.22101        | 385.22075     | 0.7  |
|                            | 413.21593        | 413.21579     | 0.3  |

---

# 49-Hydroxy Zotarolimus, m/z = 1004.55666

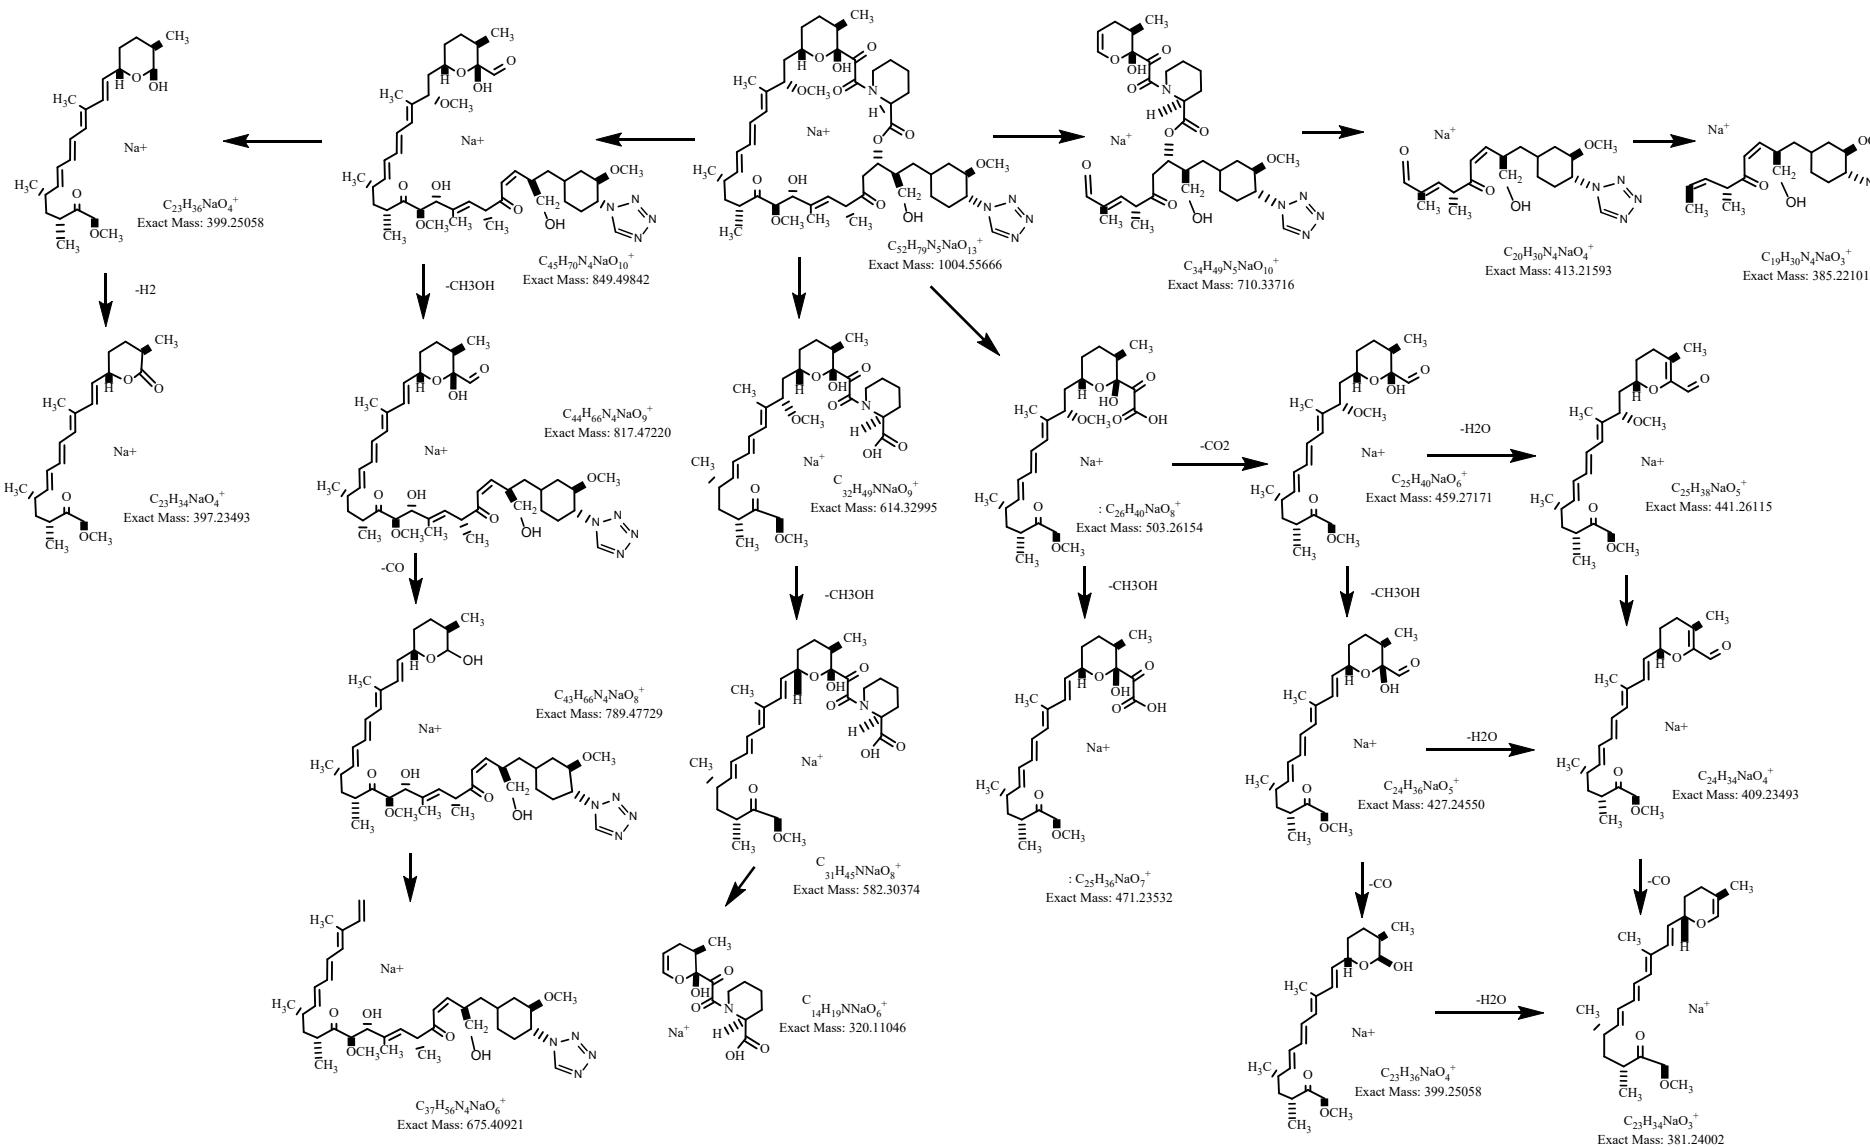



# Characteristic Fragments of 49-Hydroxy Zotarolimus, m/z = 1004.55666

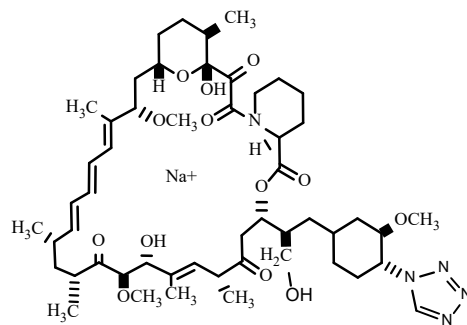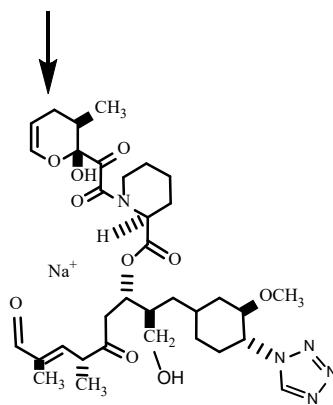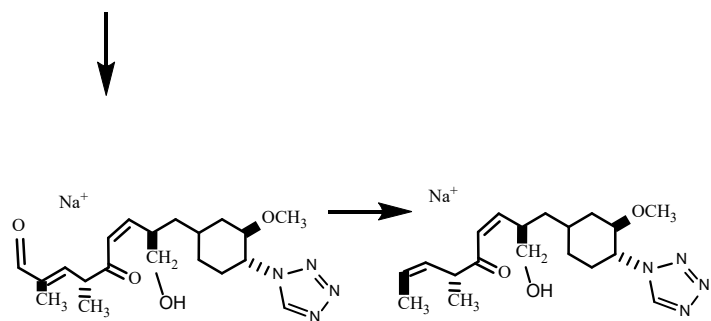

## Structural Confirmation of 49-Hydroxy Zotarolimus, m/z = 1004.55666

| Zotarolimus Fragments    | 49-Hydroxy Zotarolimus Fragments | Comments            |                                                                          |
|--------------------------|----------------------------------|---------------------|--------------------------------------------------------------------------|
| 320.11046                | 320.11046                        | no hydroxylation    | Rules out OH-piperidine, 11, 12, and 14-OH                               |
| 369.22610                | 385.22070                        | (+16) Hydroxylation | confirms 48, or 49-OH                                                    |
| 381.2396                 | 381.23977                        | no hydroxylation    | Rules out OH-piperidine, 11, 12, 14, 23, 24, 25, 45, and 46-OH           |
| 397.23493                | 397.23475                        | no hydroxylation    | Rules out 11, 12, 14, 23, 24, 25, 45, and 46-OH                          |
| 409.23493                | 409.23447                        | no hydroxylation    | Rules out 11, 12, 14, 23, 24, 25, 45, and 46-OH                          |
| 427.24550                | 427.24489                        | no hydroxylation    | Rules out 11, 12, 14, 23, 24, 25, 45, and 46-OH                          |
| 441.26115                | 441.26073                        | no hydroxylation    | Rules out 11, 12, 14, 23, 24, 25, 45, and 46-OH                          |
| 453.22476                | 453.22439                        | no hydroxylation    | Rules out 11, 12, 14, 23, 24, 25, 45, and 46-OH                          |
| 582.30374                | 582.30305                        | no hydroxylation    | Rules out 11, 12, 14, 23, 24, 25, 45, and 46-OH<br>piperidine-OH present |
| 614.32995                | 614.32937                        | no hydroxylation    | 11, 12, 14, 23, 24, 25, 45, 46-OH, and piperidine-OH                     |
| 659.41429                | 675.40899                        | (+16) Hydroxylation | 23, 24, 25, 45, 46, 47, 48, or 49-OH present                             |
| 694.34225                | 710.33689 (very low)             | (+16) Hydroxylation | Rules out 23, 24, 25, 45, and 46-OH                                      |
| 783.46672                | 799.46672 (low)                  | (+16) Hydroxylation | Rules out OH-piperidine                                                  |
| 815.49294                | 831.49277                        | (+16) Hydroxylation | Rules out OH-piperidine                                                  |
| 988.56174                | 1004.55612                       | (+16) Hydroxylation |                                                                          |
| Characteristic Fragments |                                  |                     | 413 and 385                                                              |
| Determinant patterns     |                                  |                     | No methanol loss possible                                                |

Desmethyl Zotarolimus Metabolites, ( $m/z = 974.54609$ )

## Zotarolimus Demethylated Metabolites

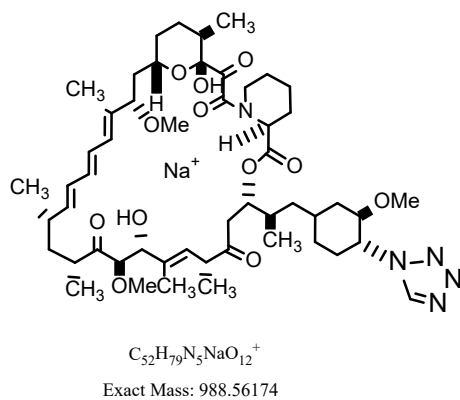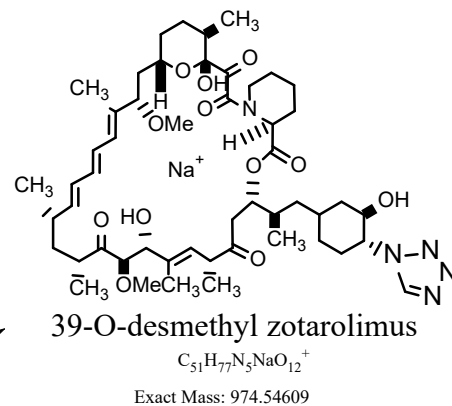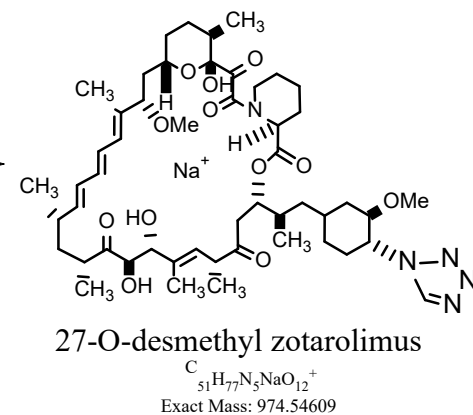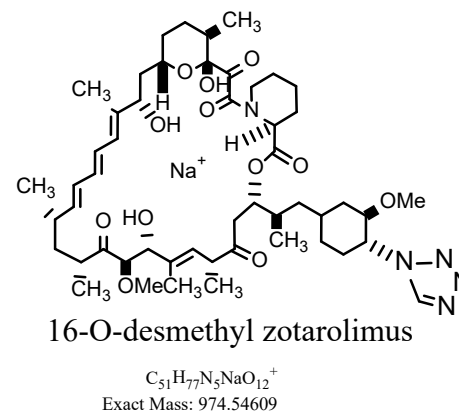

# Desmethyl Zotarolimus Metabolites

## Extracted Ion Chromatogram (EIC), $m/z = 974.54609$

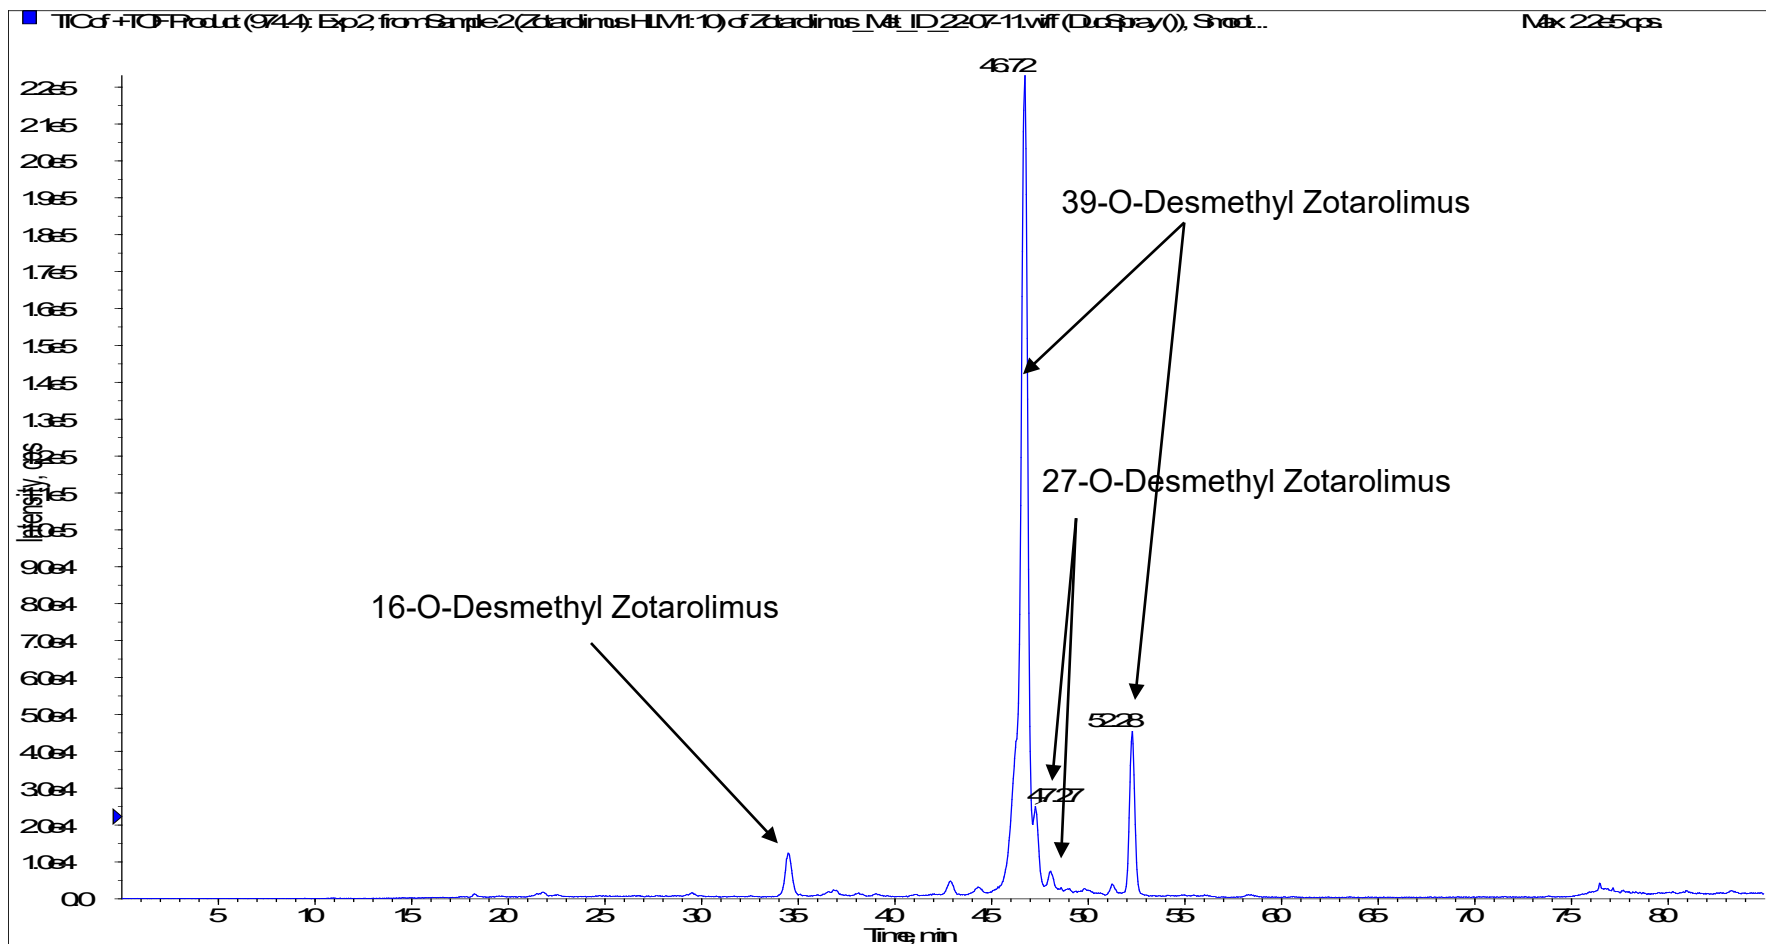

## 16-O-Desmethyl Zotarolimus (m/z = 974.54609)

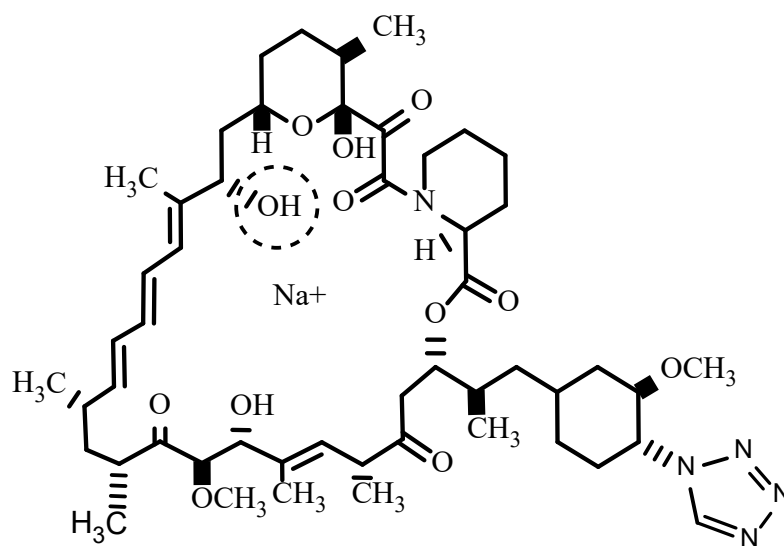

$C_{51}H_{77}N_5NaO_{12}^+$   
Exact Mass: 974.54609

16-O-desmethyl zotarolimus

# 16-O-Desmethyl Zotarolimus Metabolite

## Extracted Ion Chromatogram (EIC), $m/z = 974.54609$

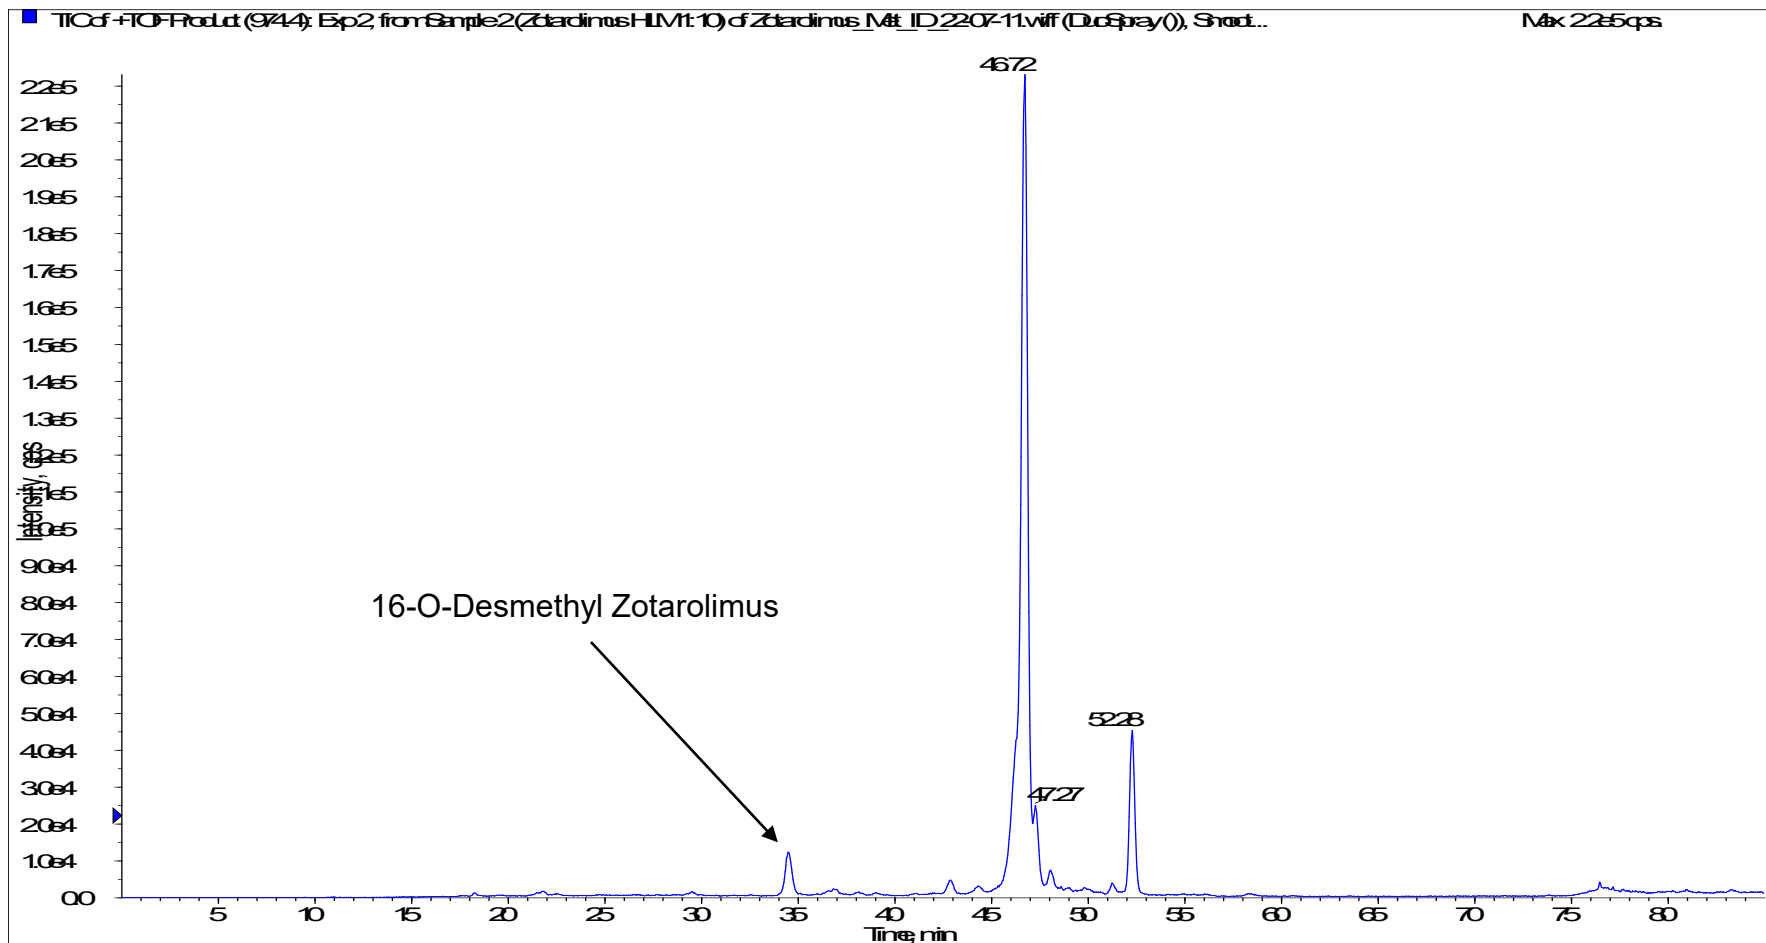

# Mass Spectrum of 16-O-desmethyl Zotarolimus

CE = 75 eV, DP = 125 V

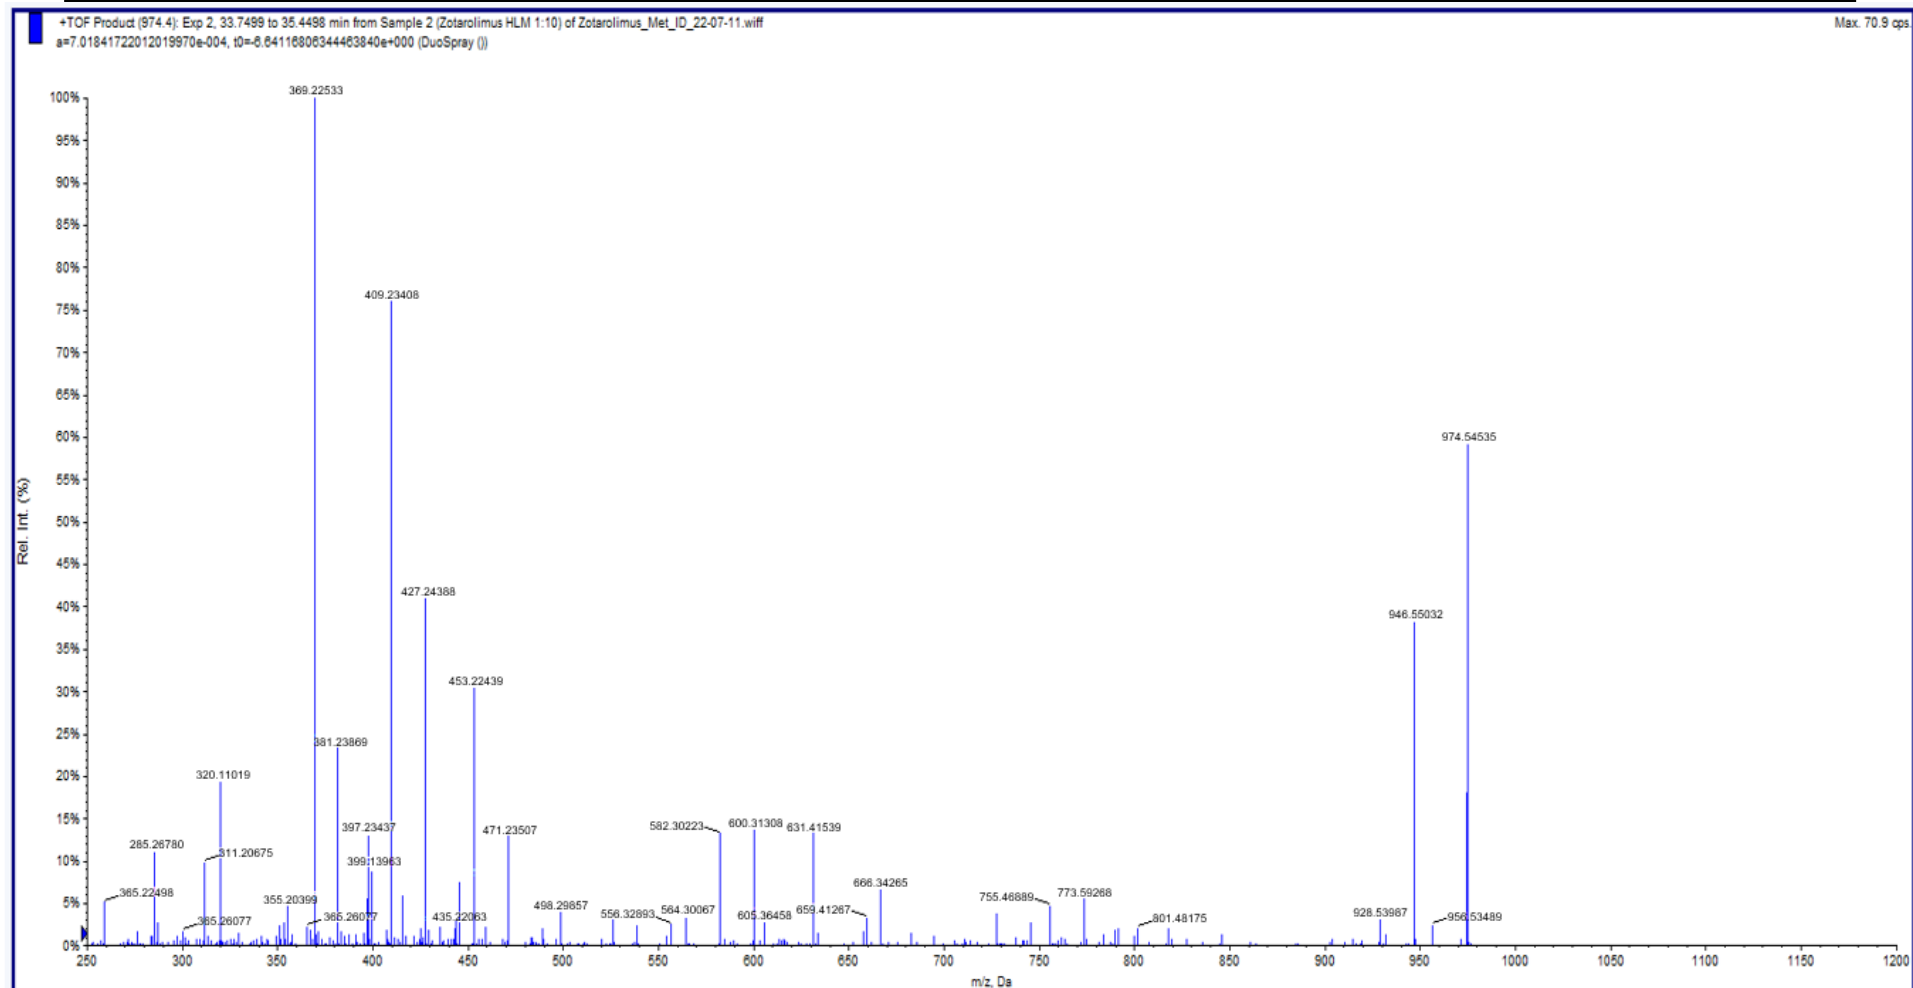



# 16-O-Desmethyl Zotarolimus Fragmentation Pattern

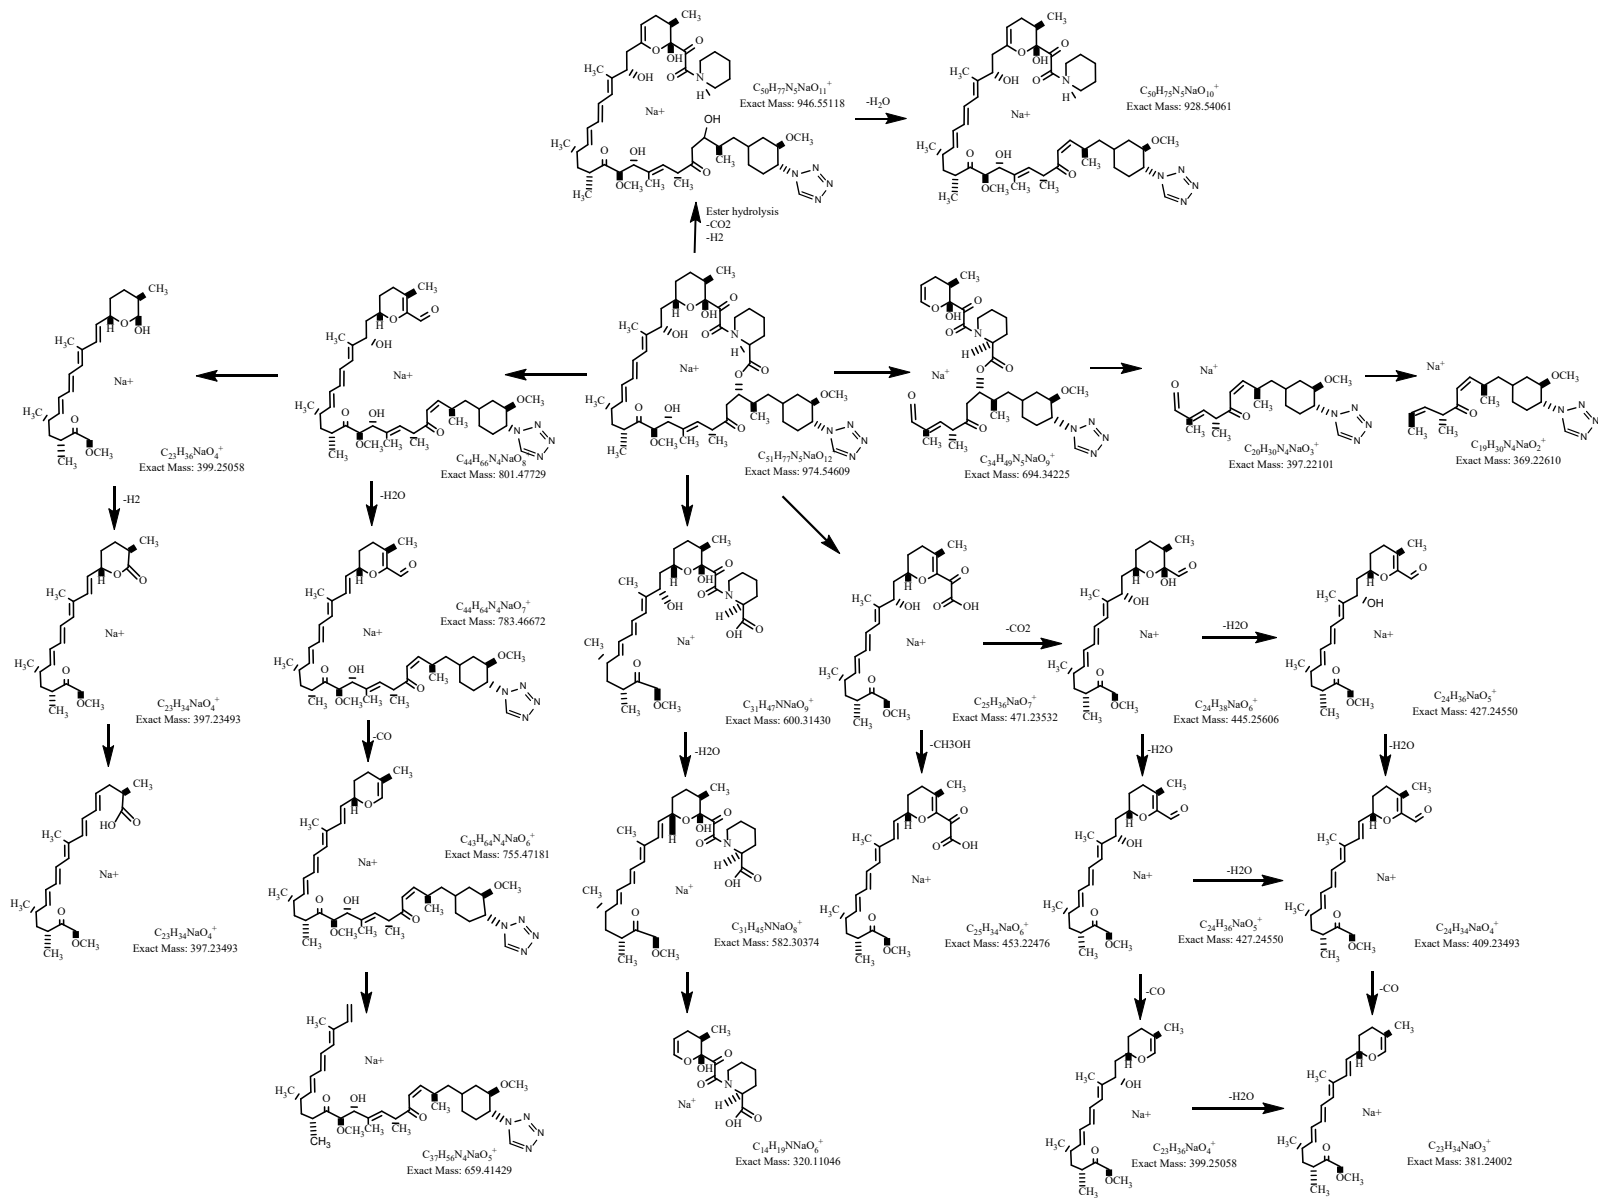

# Characteristic Fragments of 16-O-Desmethyl Zotarolimus

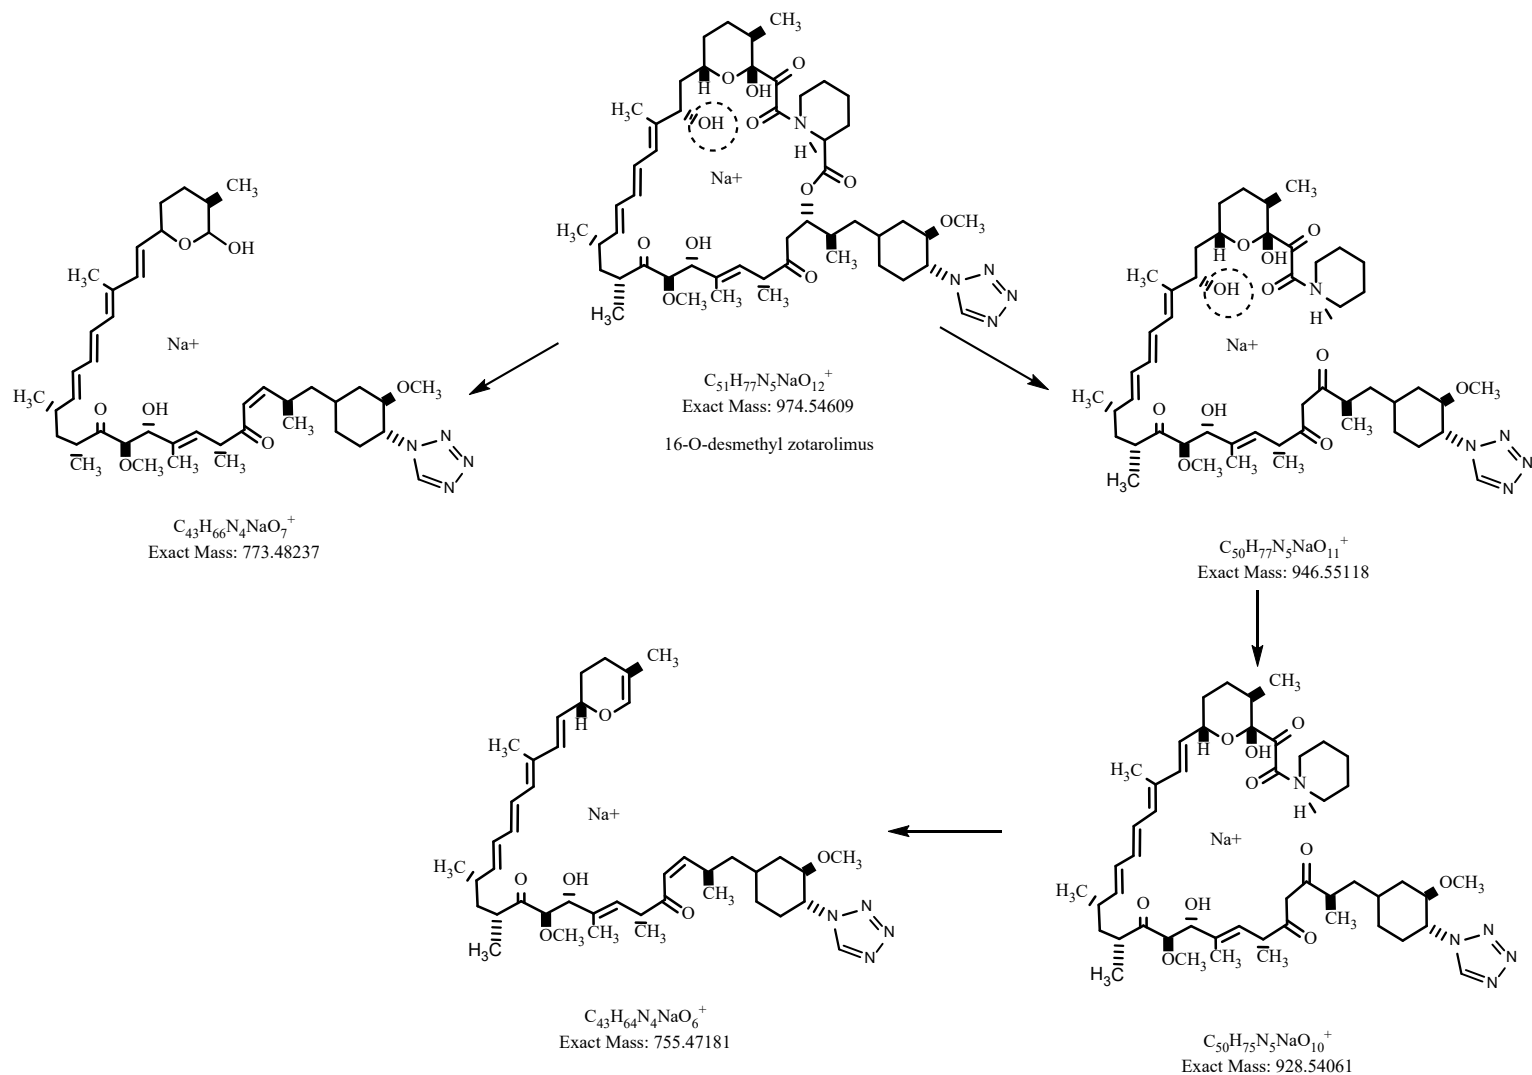

## $\Delta$ ppm of 16-O-Desmethyl Zotarolimus Fragments

---

| Fragment No. | Theoretical mass | Measured mass | $\Delta$ ppm |
|--------------|------------------|---------------|--------------|
| 1            | 320.11046        | 320.11009     | 1.2          |
| 2            | 369.22610        | 369.22533     | 2.1          |
| 3            | 397.23493        | 397.23437     | 1.4          |
| 4            | 409.23493        | 409.23408     | 2.1          |
| 5            | 427.24550        | 427.24388     | 3.8          |
| 6            | 453.22476        | 453.22439     | 0.8          |
| 7            | 471.23532        | 471.23507     | 0.5          |
| 8            | 582.30374        | 582.30223     | 2.6          |
| 9            | 600.31430        | 600.31308     | 2.0          |
| 10           | 659.41429        | 659.41267     | 2.5          |
| 11           | 694.34225        | 694.34099     | 1.8          |
| 12           | 755.47181        | 755.46889     | 3.9          |
| 13           | 974.54609        | 974.54535     | 0.8          |

## Structural Confirmation of 16-O-Desmethyl Zotarolimus, m/z = 1004.55666

| Zotarolimus Fragments    | 16-O-desmethyl Zotarolimus Fragments | Comments         |                                                                                                                                                                |
|--------------------------|--------------------------------------|------------------|----------------------------------------------------------------------------------------------------------------------------------------------------------------|
| 320.11046                | 320.11009                            | no demethylation | Not conclusive                                                                                                                                                 |
| 369.22610                | 369.22533                            | no demethylation | Rules out 39-O-desmethyl                                                                                                                                       |
| 397.23493                | 397.23437                            | no demethylation | Rules out 39-O-desmethyl                                                                                                                                       |
| 409.23493                | 409.23408                            | no demethylation | confirms 16-O-desmethyl after water elimination                                                                                                                |
| 427.24550                | 427.26090                            | Demethylation    | confirms 16-O-desmethyl after water elimination                                                                                                                |
| 453.22476                | 453.22439                            | no demethylation | confirms 16-O-desmethyl after water elimination                                                                                                                |
| 485.25097                | 471.23507                            | Demethylation    | 16, or 27-O-desmethyl present                                                                                                                                  |
| 582.30374                | 582.30223                            | no demethylation | confirms 16-O-desmethyl after water elimination                                                                                                                |
| 614.32995                | 600.31308                            | Demethylation    | 16, or 27-O-desmethyl present                                                                                                                                  |
| 659.41429                | 659.41267                            | no demethylation | 16, 27, 39-O-desmethyl present                                                                                                                                 |
| 694.34225                | 694.34099                            | no demethylation | Rules out 39-O-desmethyl                                                                                                                                       |
| 783.46672                | 783.46603                            | no demethylation | 16, 27, 39-O-desmethyl present                                                                                                                                 |
| 988.56174                | 974.54535                            | Demethylation    | 16, 27, 39-O-desmethyl present                                                                                                                                 |
| Characteristic Fragments | 928 and 755                          |                  |                                                                                                                                                                |
| Determinant patterns     |                                      |                  | Characteristic fragment for water loss (600 - 18 = 582 m/z) of 16-O-desmethyl<br>Characteristic fragment for water loss (946 - 18 = 928 m/z) of 16-O-desmethyl |

# 39-O-Desmethyl Zotarolimus (m/z = 974.54609)

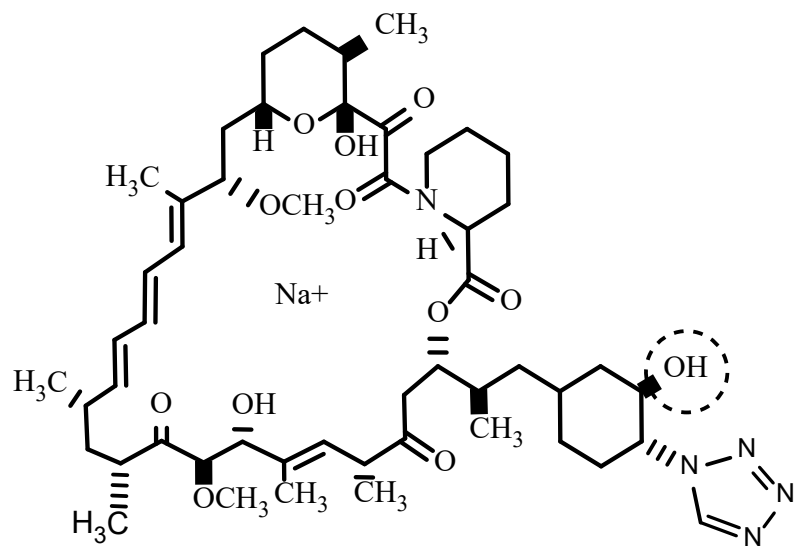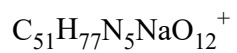

Exact Mass: 974.54609

39-O-desmethyl zotarolimus

# 39-O-Desmethyl Zotarolimus Metabolite

## Extracted Ion Chromatogram (EIC), m/z = 974.54609

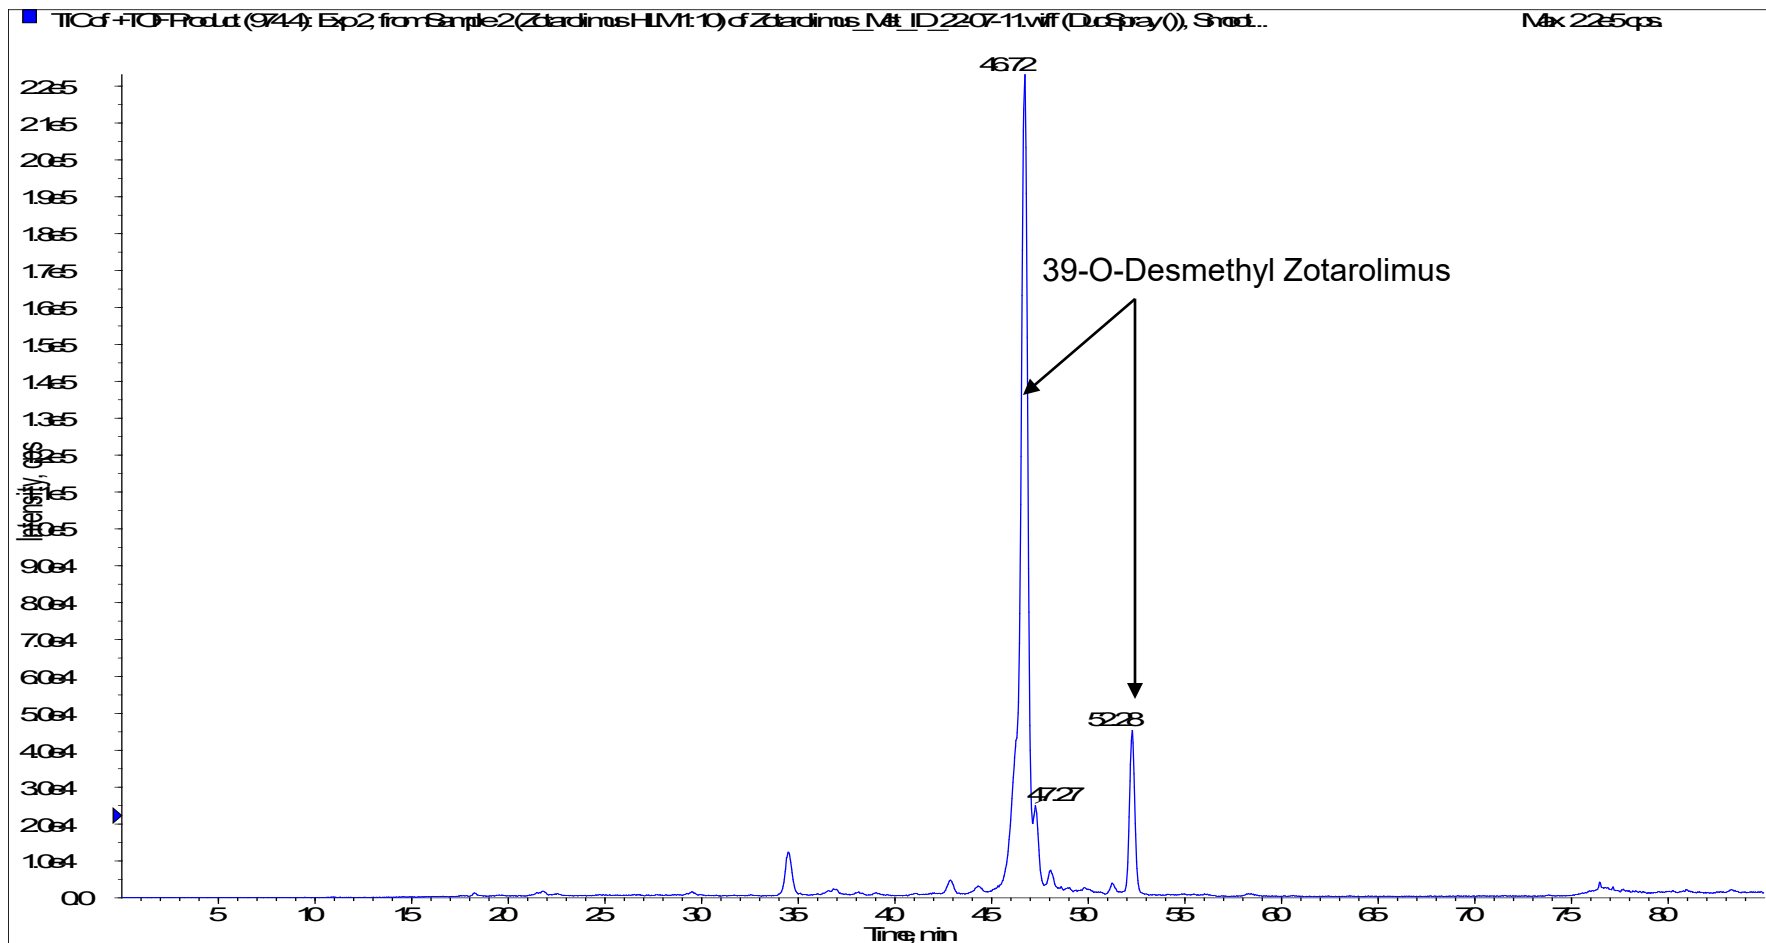

39-O-Desmethyl Zotarolimus Metabolite  
Extracted Ion Chromatogram (EIC),  $m/z = 974.54609$   
RT = 46.72 min

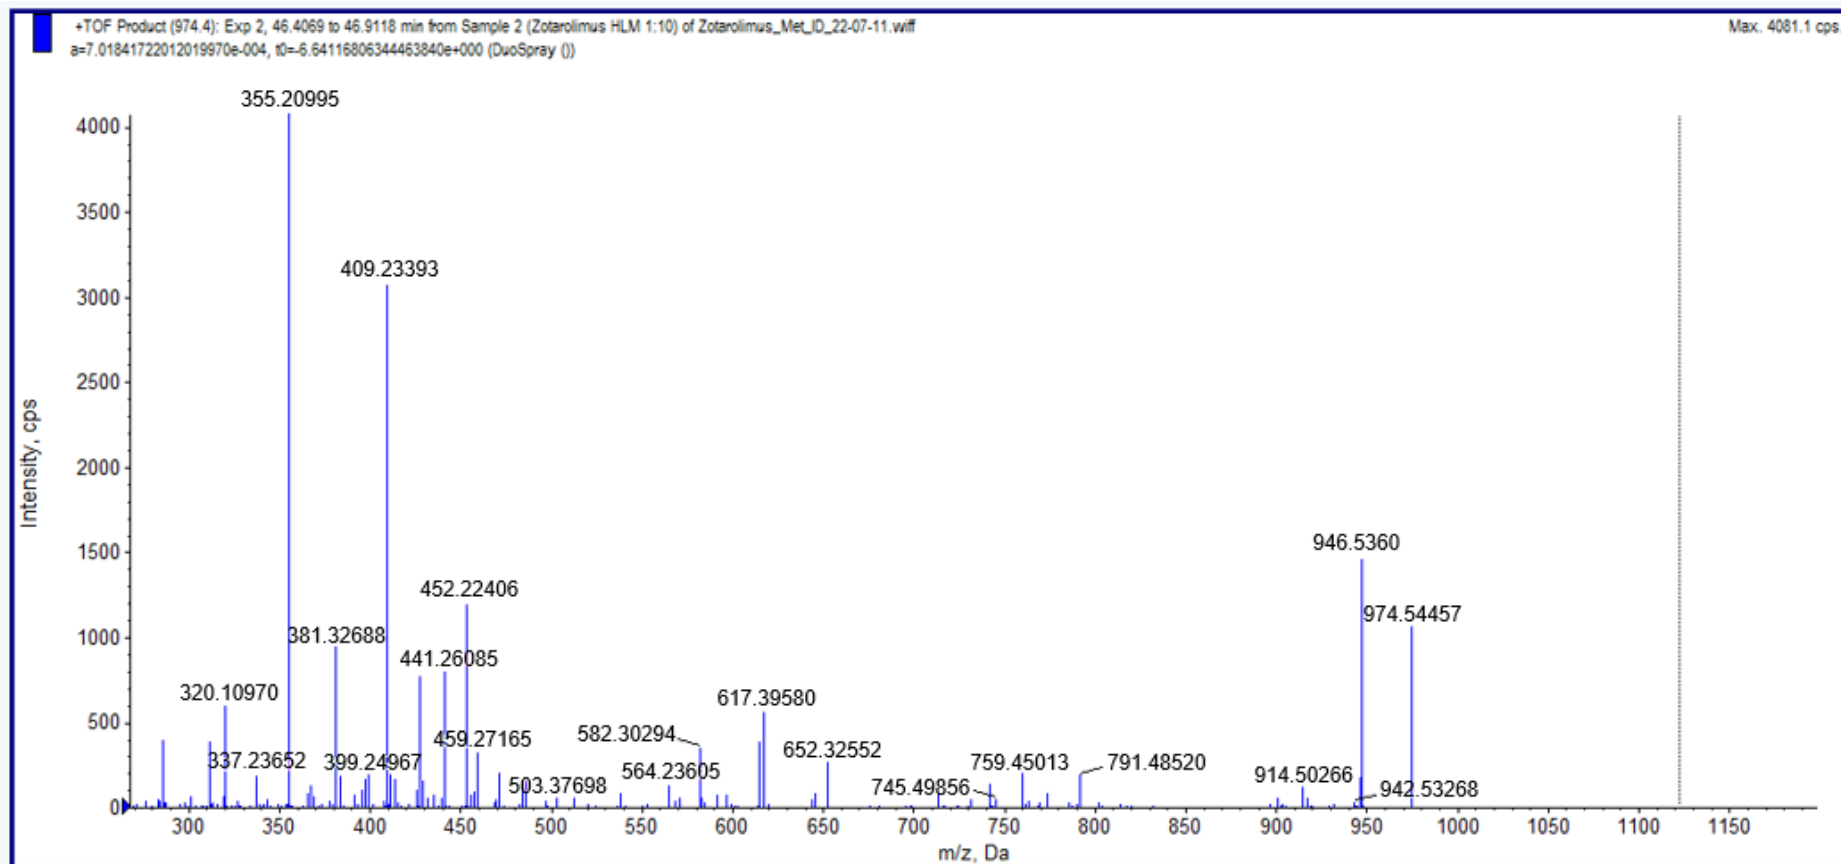

39-O-Desmethyl Zotarolimus Metabolite  
Extracted Ion Chromatogram (EIC),  $m/z = 974.54609$   
RT = 52.28 min

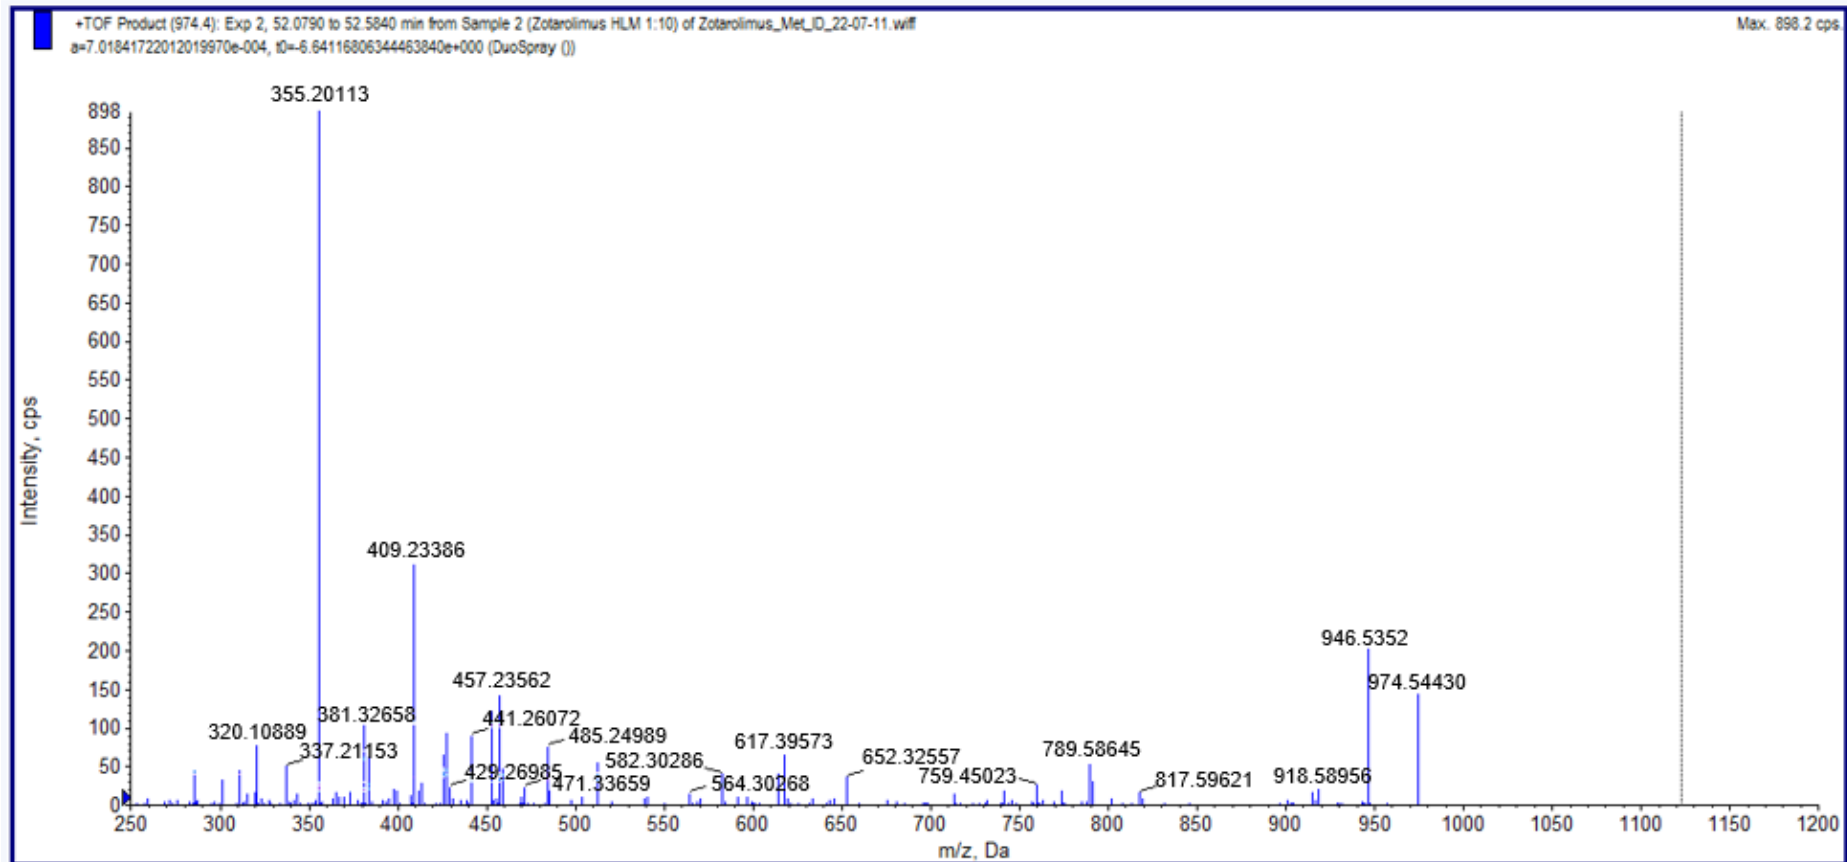



## $\Delta$ ppm of 39-O-Desmethyl Zotarolimus Fragments

---

| Fragment No. | Theoretical mass | Measured mass | $\Delta$ ppm |
|--------------|------------------|---------------|--------------|
| 1            | 320.11046        | 320.1097      | 2.4          |
| 2            | 383.20536        | 383.20486     | 1.3          |
| 3            | 355.21045        | 355.20995     | 1.4          |
| 4            | 399.25058        | 399.24967     | 2.3          |
| 5            | 409.23493        | 409.23393     | 2.4          |
| 6            | 441.26115        | 441.26085     | 0.7          |
| 7            | 453.22476        | 453.22412     | 1.4          |
| 8            | 485.25097        | 485.25012     | 1.8          |
| 9            | 582.30374        | 582.30294     | 1.4          |
| 10           | 614.32995        | 614.32845     | 2.4          |
| 11           | 974.54609        | 974.54457     | 1.6          |

# 39-O-Desmethyl Zotarolimus Fragmentation Pattern

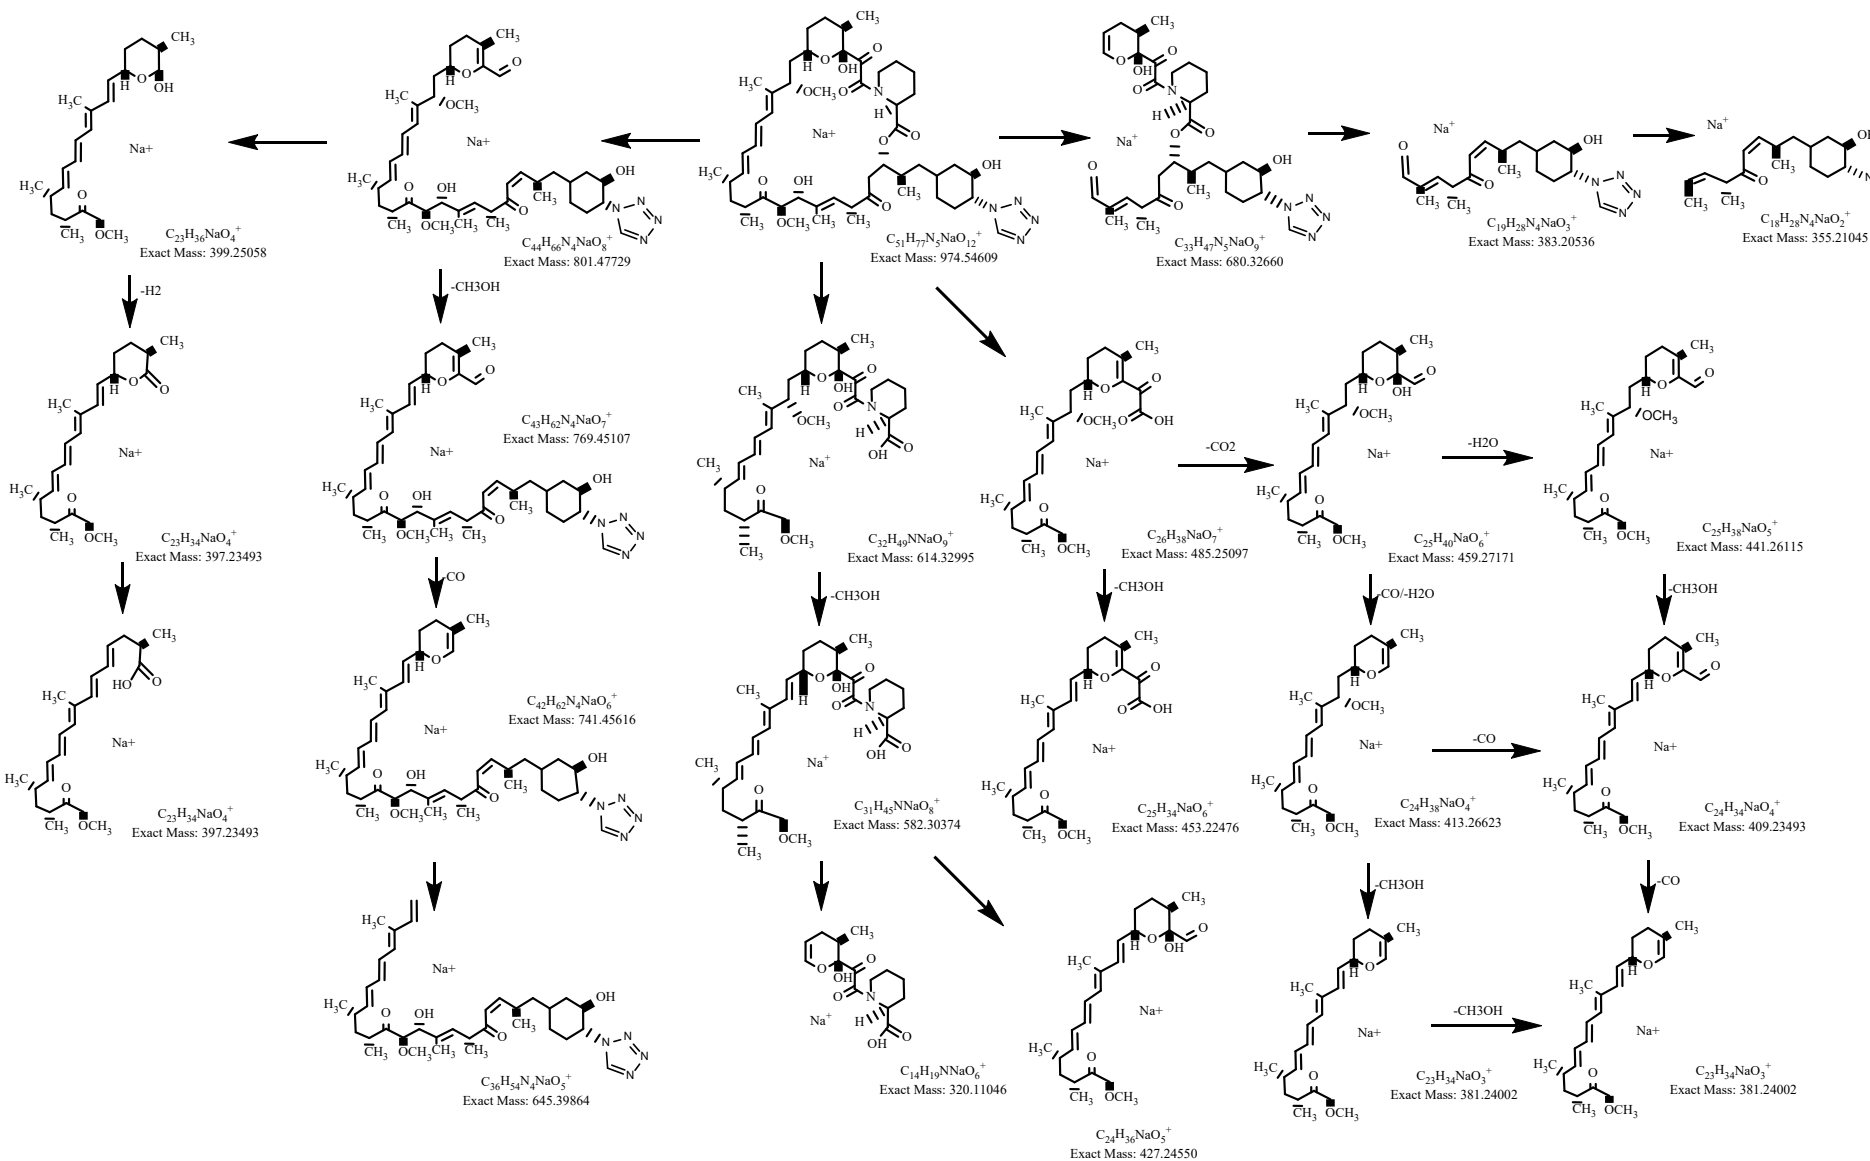

## Structural Confirmation of 39-O-Desmethyl Zotarolimus, m/z = 1004.55666

| Zotarolimus Fragments    | 39-O-desmethyl Zotarolimus Fragments | Comments                 |                                       |
|--------------------------|--------------------------------------|--------------------------|---------------------------------------|
| 320.11046                | 320.10975                            | no demethylation         | Not conclusive                        |
| 369.22610                | 355.20999                            | Demethylation            | confirms 39-O-desmethyl               |
| 397.23493                | ND                                   | ND                       | ND                                    |
| 409.23493                | 409.23397                            | no demethylation         | 16, or 27-O-desmethyl present         |
| 441.26115                | 441.26089                            | no demethylation         | rules out 16, and 27-O-desmethyl      |
| 453.22476                | 453.22439                            | no demethylation         | 16, or 27-O-desmethyl present         |
| 485.25097                | 485.25002                            | no demethylation         | rules out 16, or 27-O-desmethyl       |
| 582.30374                | 582.30297                            | no demethylation         | 16, or 27-O-desmethyl present         |
| 614.32995                | 614.32857                            | no demethylation         | rules out 16, and 27-O-desmethyl      |
| 659.41429                | 645.39864                            | Demethylation (very low) | 16, 27, 39-O-desmethyl present        |
| 974.54609                | 974.54457                            | no demethylation         |                                       |
| Characteristic Fragments | 355, 441, 614, and 741               |                          | No 369 confirms demethylation at C-39 |
| Determinant patterns     |                                      |                          |                                       |

27-O-Desmethyl Zotarolimus (m/z = 974.54609)

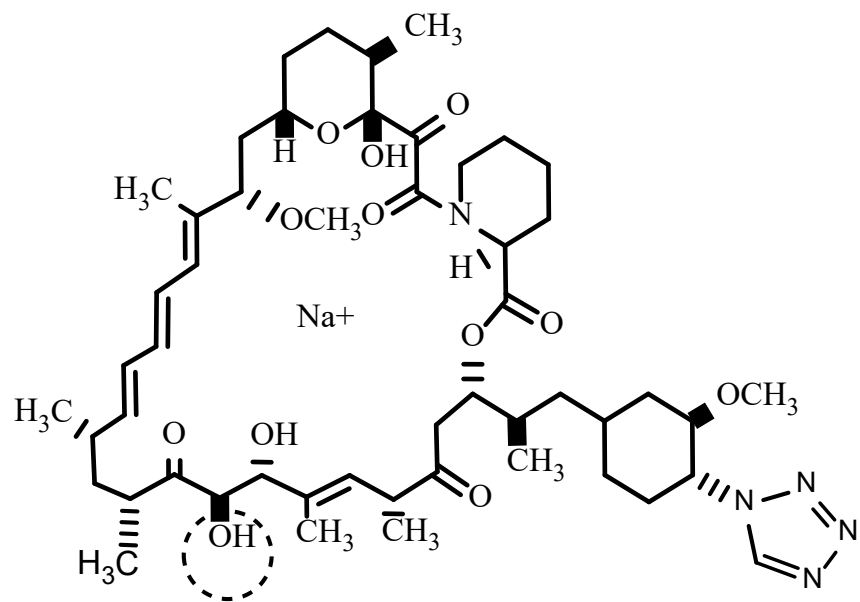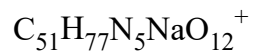

Exact Mass: 974.54609

27-O-desmethyl zotarolimus

# 27-O-Desmethyl Zotarolimus Metabolite

## Extracted Ion Chromatogram (EIC), $m/z = 974.54609$

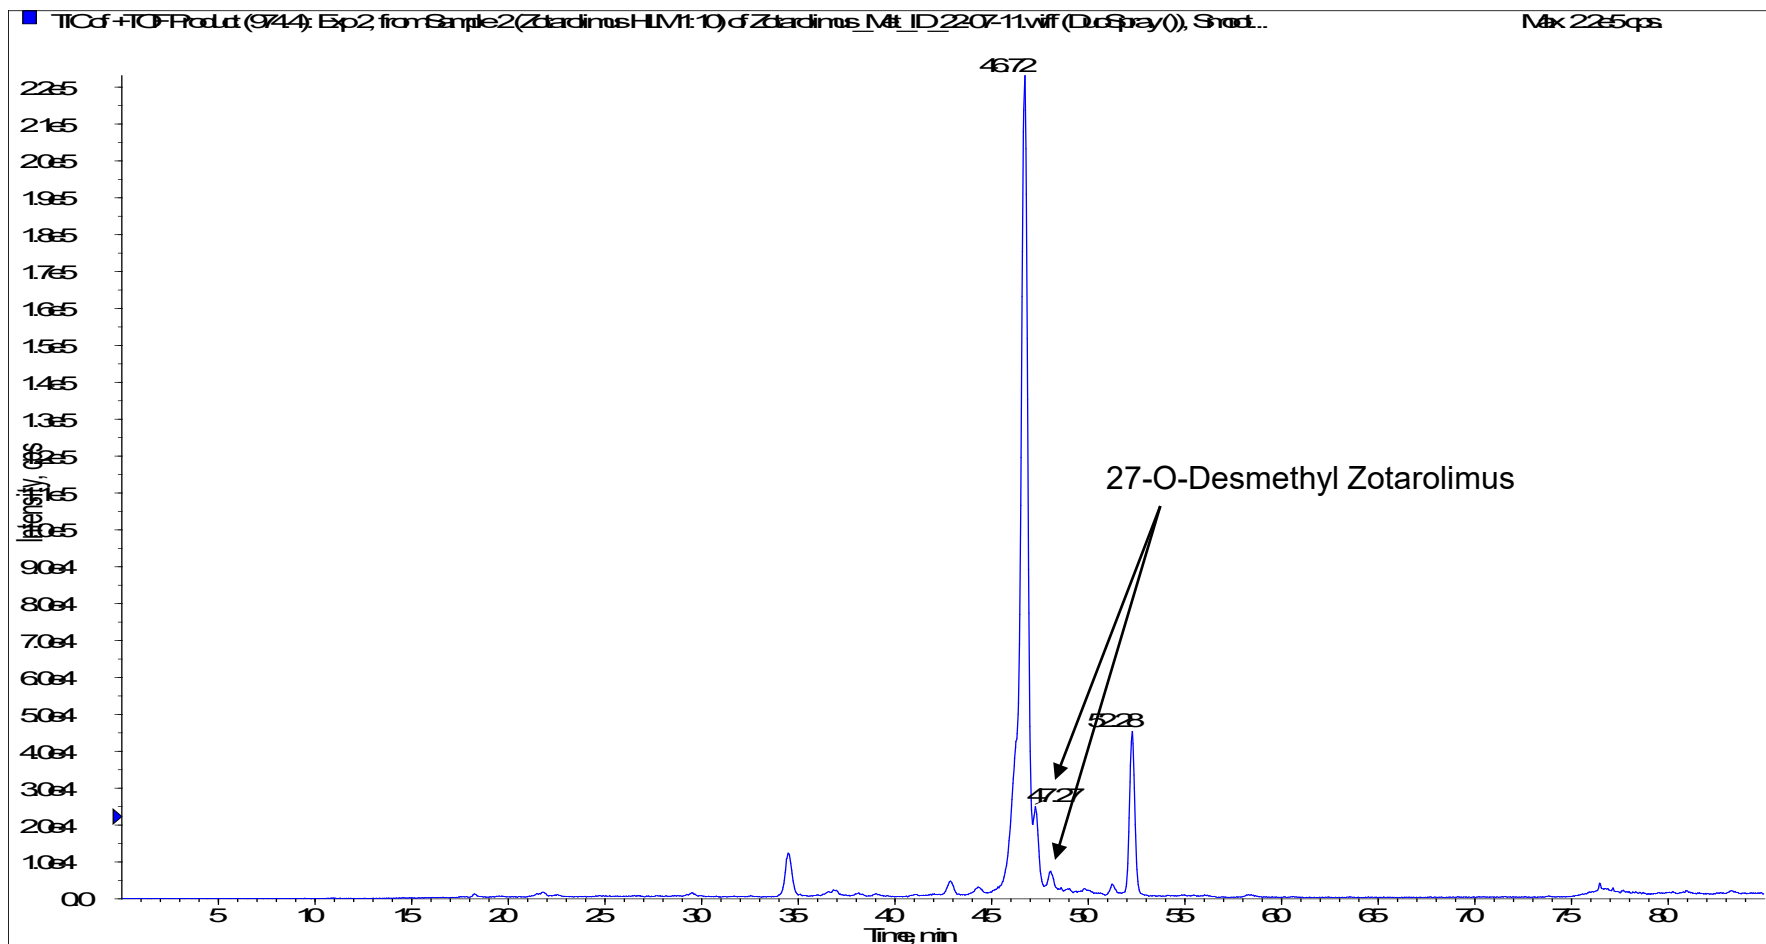

# 27-O-Desmethyl Zotarolimus Metabolite

## Extracted Ion Chromatogram (EIC), $m/z = 974.54609$

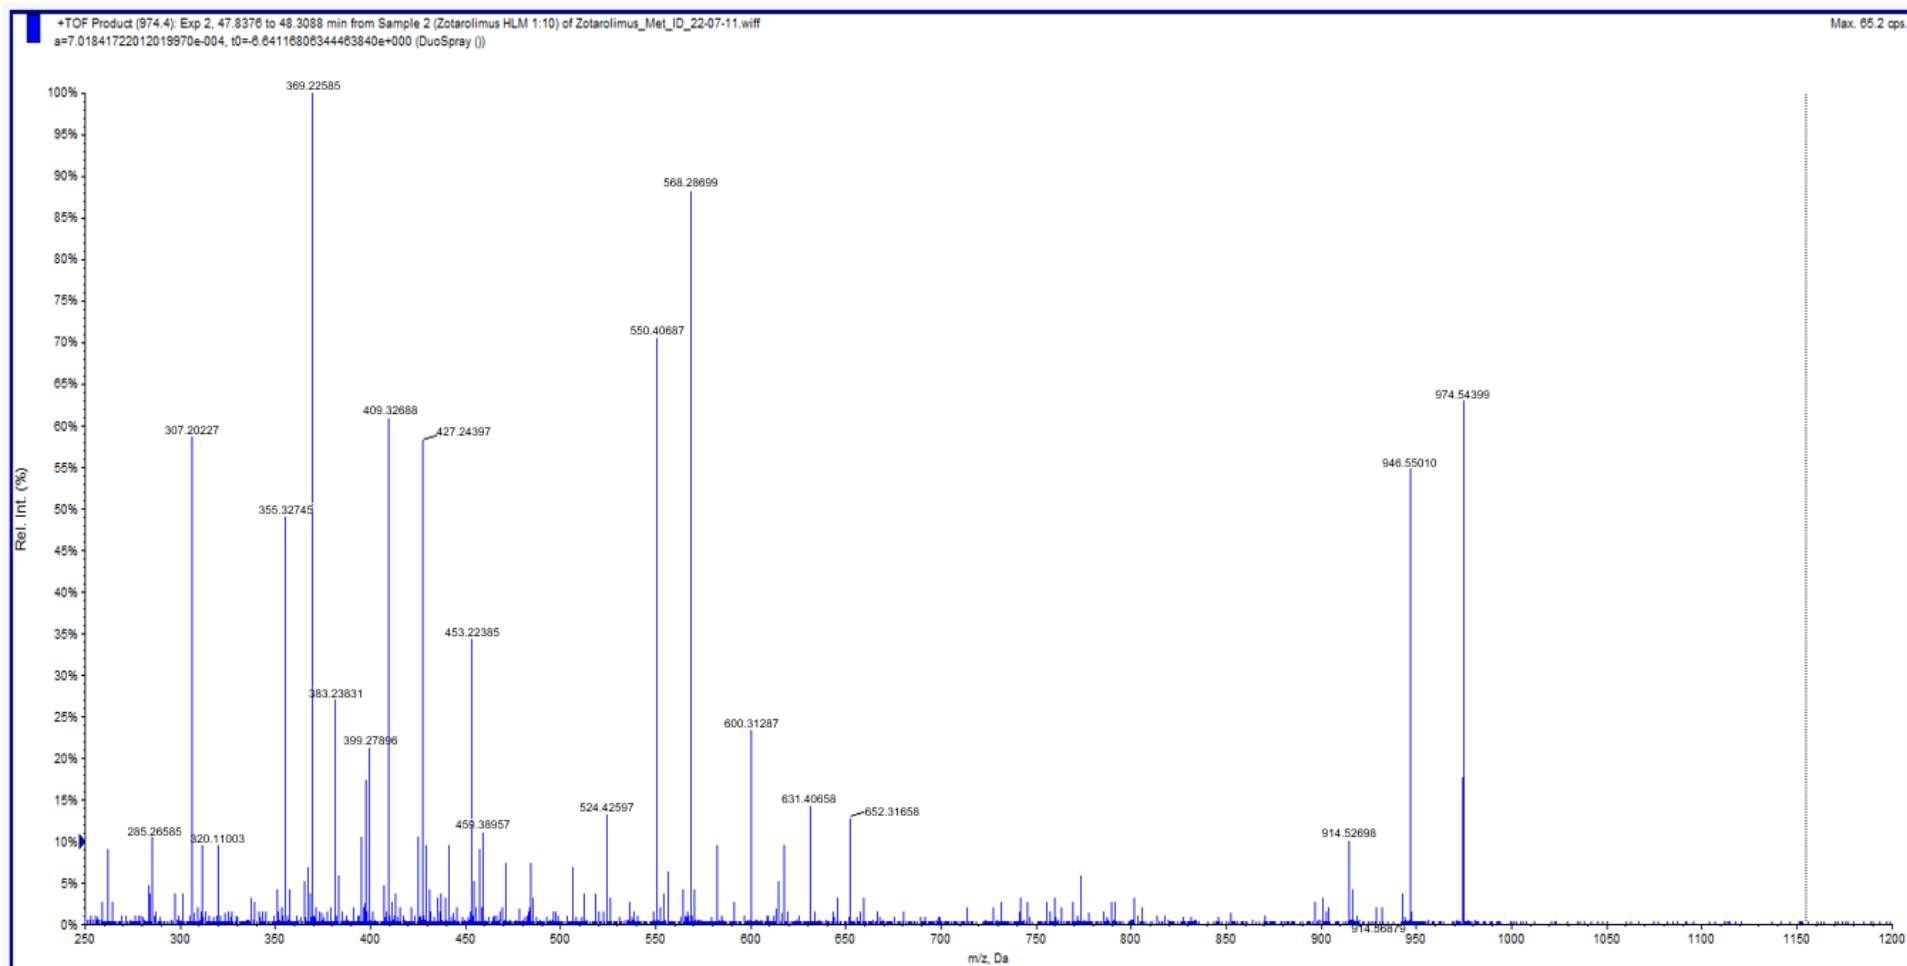

## $\Delta$ ppm of 27-O-Desmethyl Zotarolimus Fragments

---

| Fragment No. | Theoretical mass | Measured mass | $\Delta$ ppm |
|--------------|------------------|---------------|--------------|
| 1            | 320.11046        | 320.11003     | 1.3          |
| 2            | 307.20324        | 307.20277     | 1.5          |
| 3            | 369.2261         | 369.22585     | 0.7          |
| 4            | 397.22101        | 397.21997     | 2.6          |
| 5            | 427.24550        | 427.24397     | 3.6          |
| 6            | 445.25606        | 445.25538     | 1.5          |
| 7            | 471.23532        | 471.23469     | 1.3          |
| 8            | 568.28809        | 568.28699     | 1.9          |
| 9            | 600.3143         | 600.31287     | 2.4          |
| 10           | 974.54609        | 974.54399     | 2.2          |

# 27-O-Desmethyl Zotarolimus Fragmentation Pattern

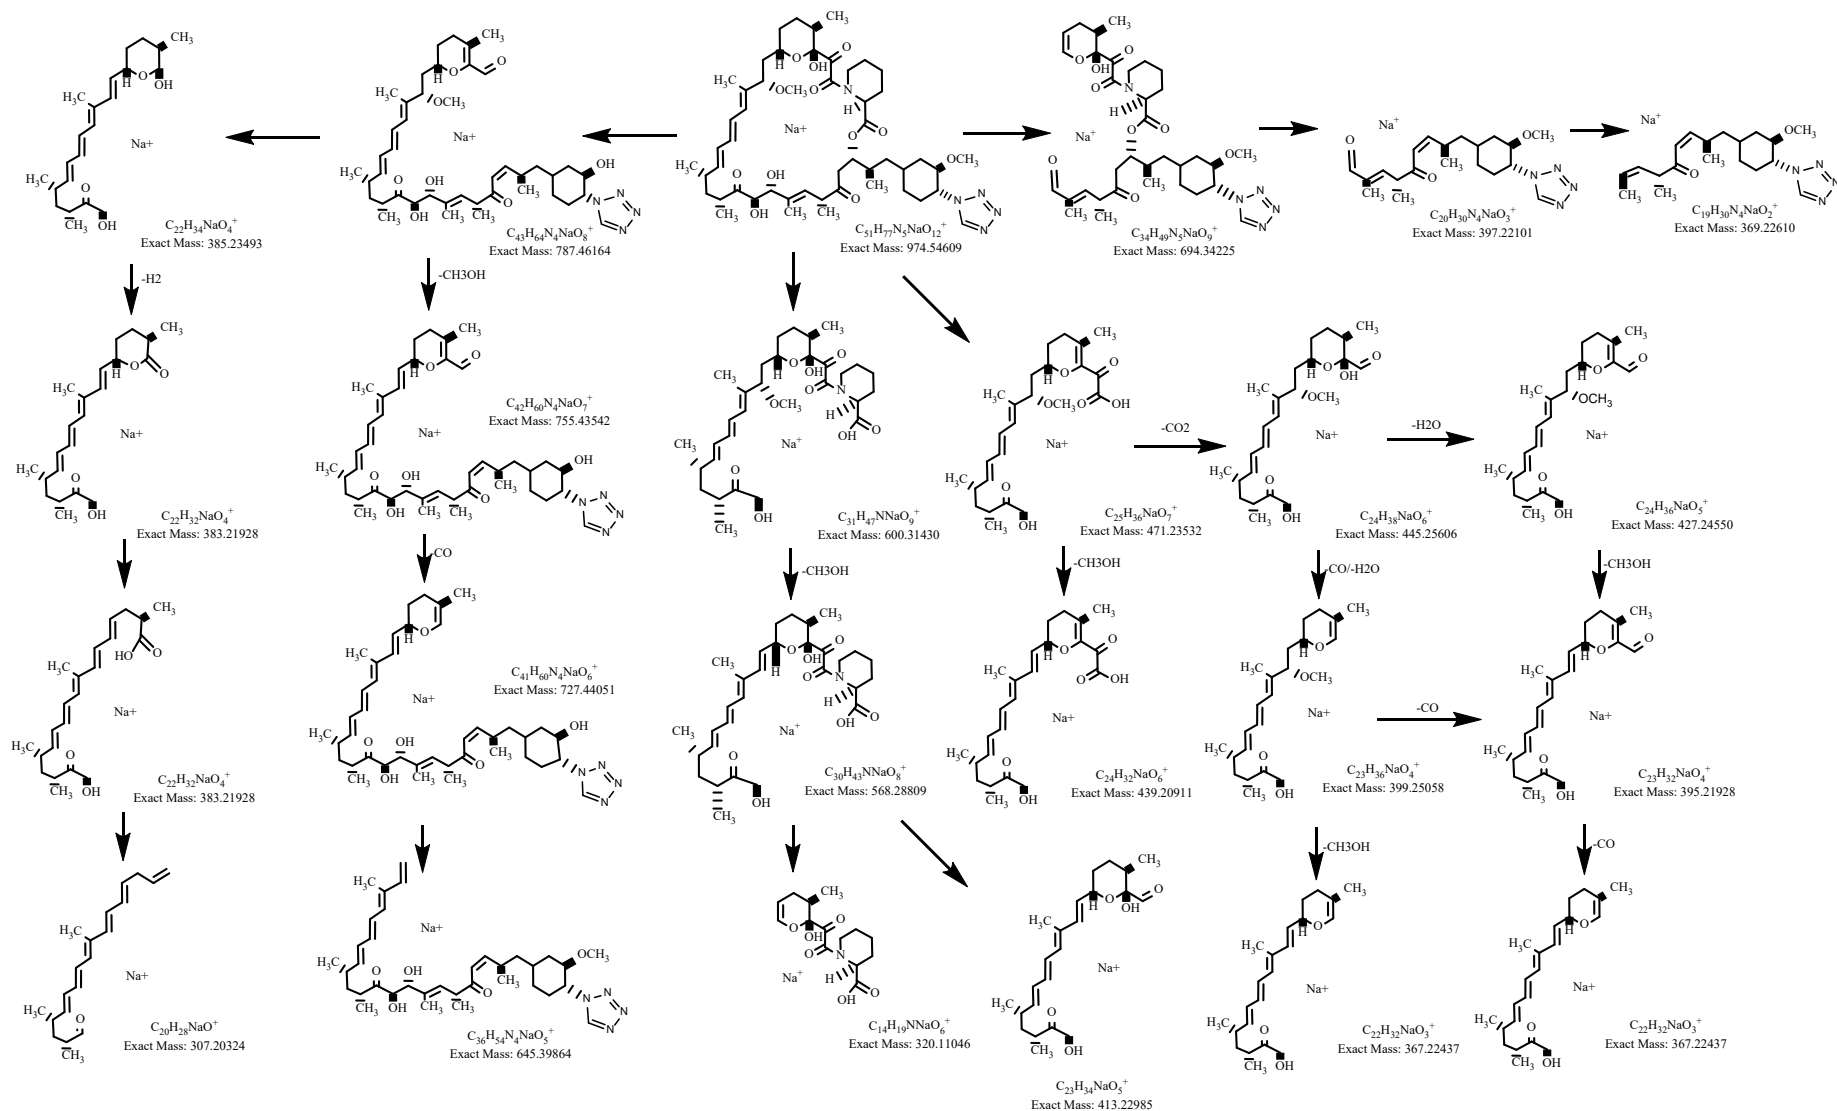



## Structural Confirmation of 27-O-Desmethyl Zotarolimus, m/z = 1004.55666

| Zotarolimus<br>Fragments | 27-O-<br>desmethyl<br>Zotarolimus<br>Fragments | Comments         |                                                                                                                       |
|--------------------------|------------------------------------------------|------------------|-----------------------------------------------------------------------------------------------------------------------|
|                          |                                                |                  |                                                                                                                       |
| 320.11046                | 320.11003                                      | no demethylation | Not conclusive                                                                                                        |
| 369.22610                | 369.22585                                      | no demethylation | Rules out 39-O-desmethyl                                                                                              |
| 397.23493                | 397.21997                                      | no demethylation | Rules out 39-O-desmethyl                                                                                              |
| 409.23493                | 395.21928                                      | Demethylation    | confirms 27-O-desmethyl                                                                                               |
| 441.26115                | 427.24397                                      | Demethylation    | 16, and 27-O-desmethyl present                                                                                        |
| 453.22476                | 439.20911                                      | nd               | n/a                                                                                                                   |
| 485.25097                | 471.23469                                      | Demethylation    | 16, and 27-O-desmethyl present                                                                                        |
| 582.30374                | 568.28699                                      | Demethylation    | confirms 27-O-desmethyl                                                                                               |
| 614.32995                | 600.31287                                      | Demethylation    | 16, and 27-O-desmethyl present                                                                                        |
| 659.41429                | 645.39864                                      | nd               | 27, and 39-O-desmethyl present                                                                                        |
| 974.54609                | 974.54399                                      | no demethylation |                                                                                                                       |
| Characteristic Fragments | 307, 383, 395,<br>550, and 568                 |                  |                                                                                                                       |
| Determinant patterns     |                                                |                  | No water loss at C-27 compared to the corresponding 16-ODM fragments<br>water loss at C-10 by fragment 568 – 18 = 550 |

Desmethyl, Hydroxy Zotarolimus Metabolites,  $m/z = 990.54101$

# Desmethyl, Hydroxy Zotarolimus Metabolites, $m/z = 990.54101$

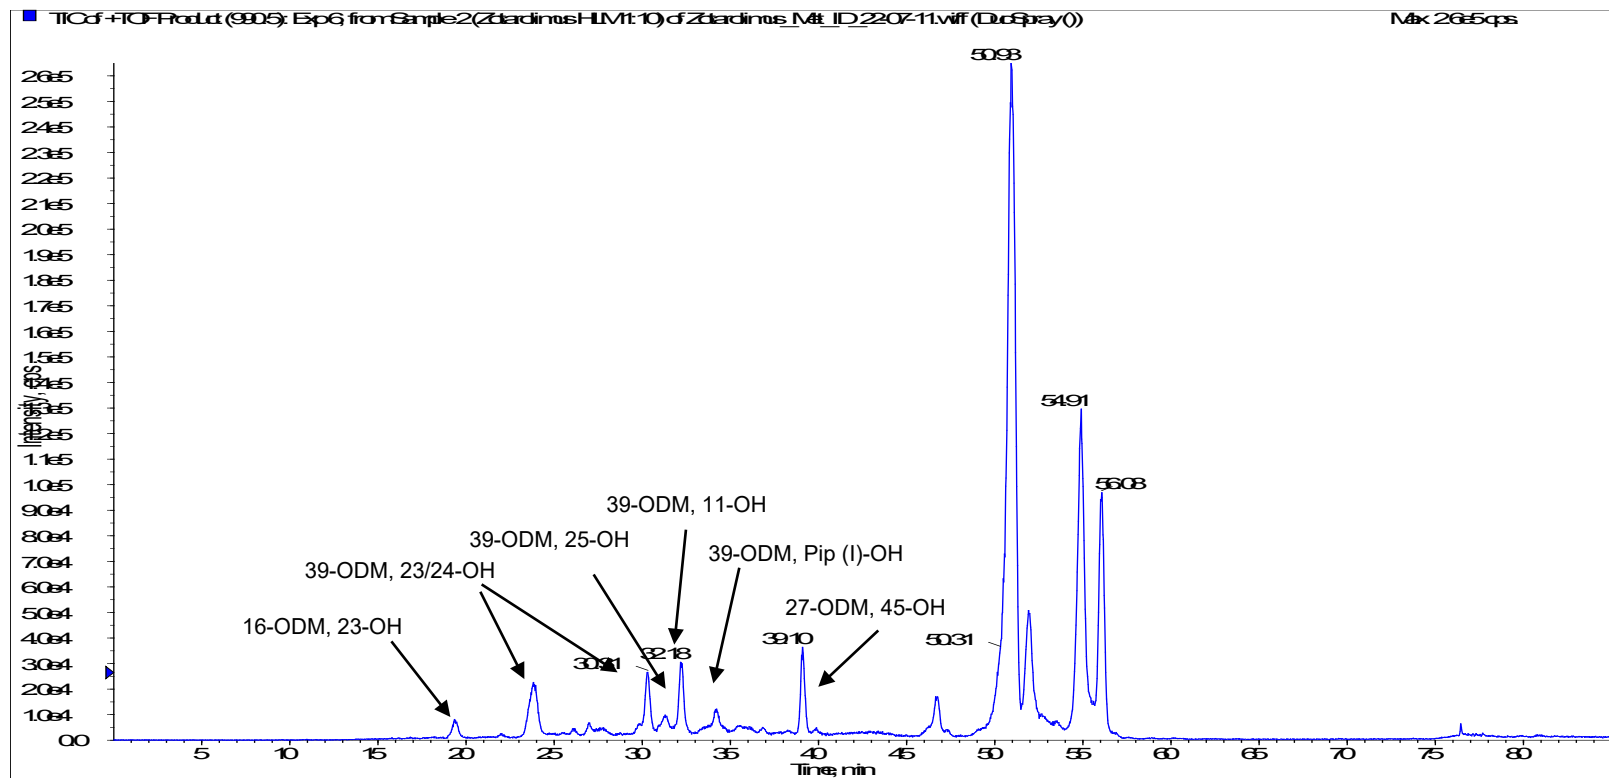

16-O-Desmethyl, 23-Hydroxy Zotarolimus, m/z = 990.54101

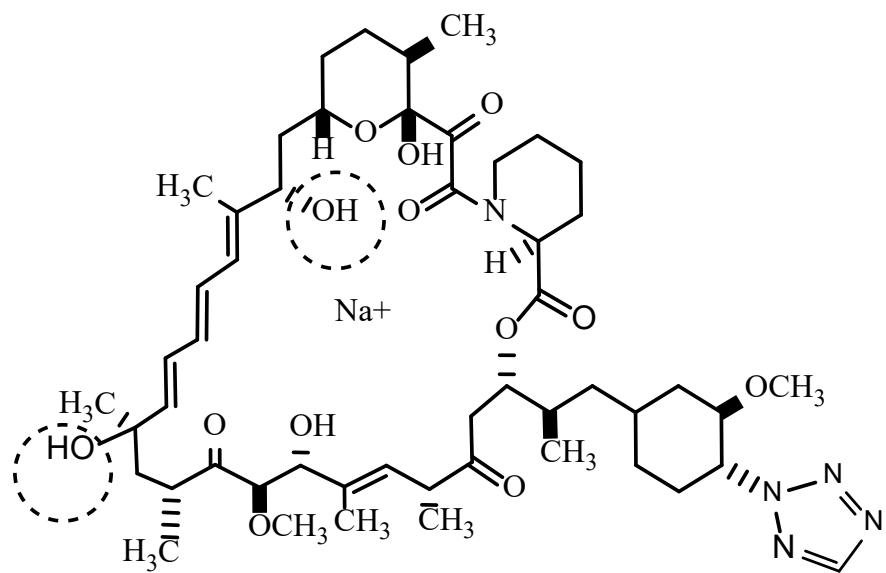

$C_{51}H_{77}N_5NaO_{13}^+$   
Exact Mass: 990.54101

# 16-O-Desmethyl, 23-Hydroxy Zotarolimus $m/z = 990.54101$

## Extracted Ion Chromatogram (EIC)

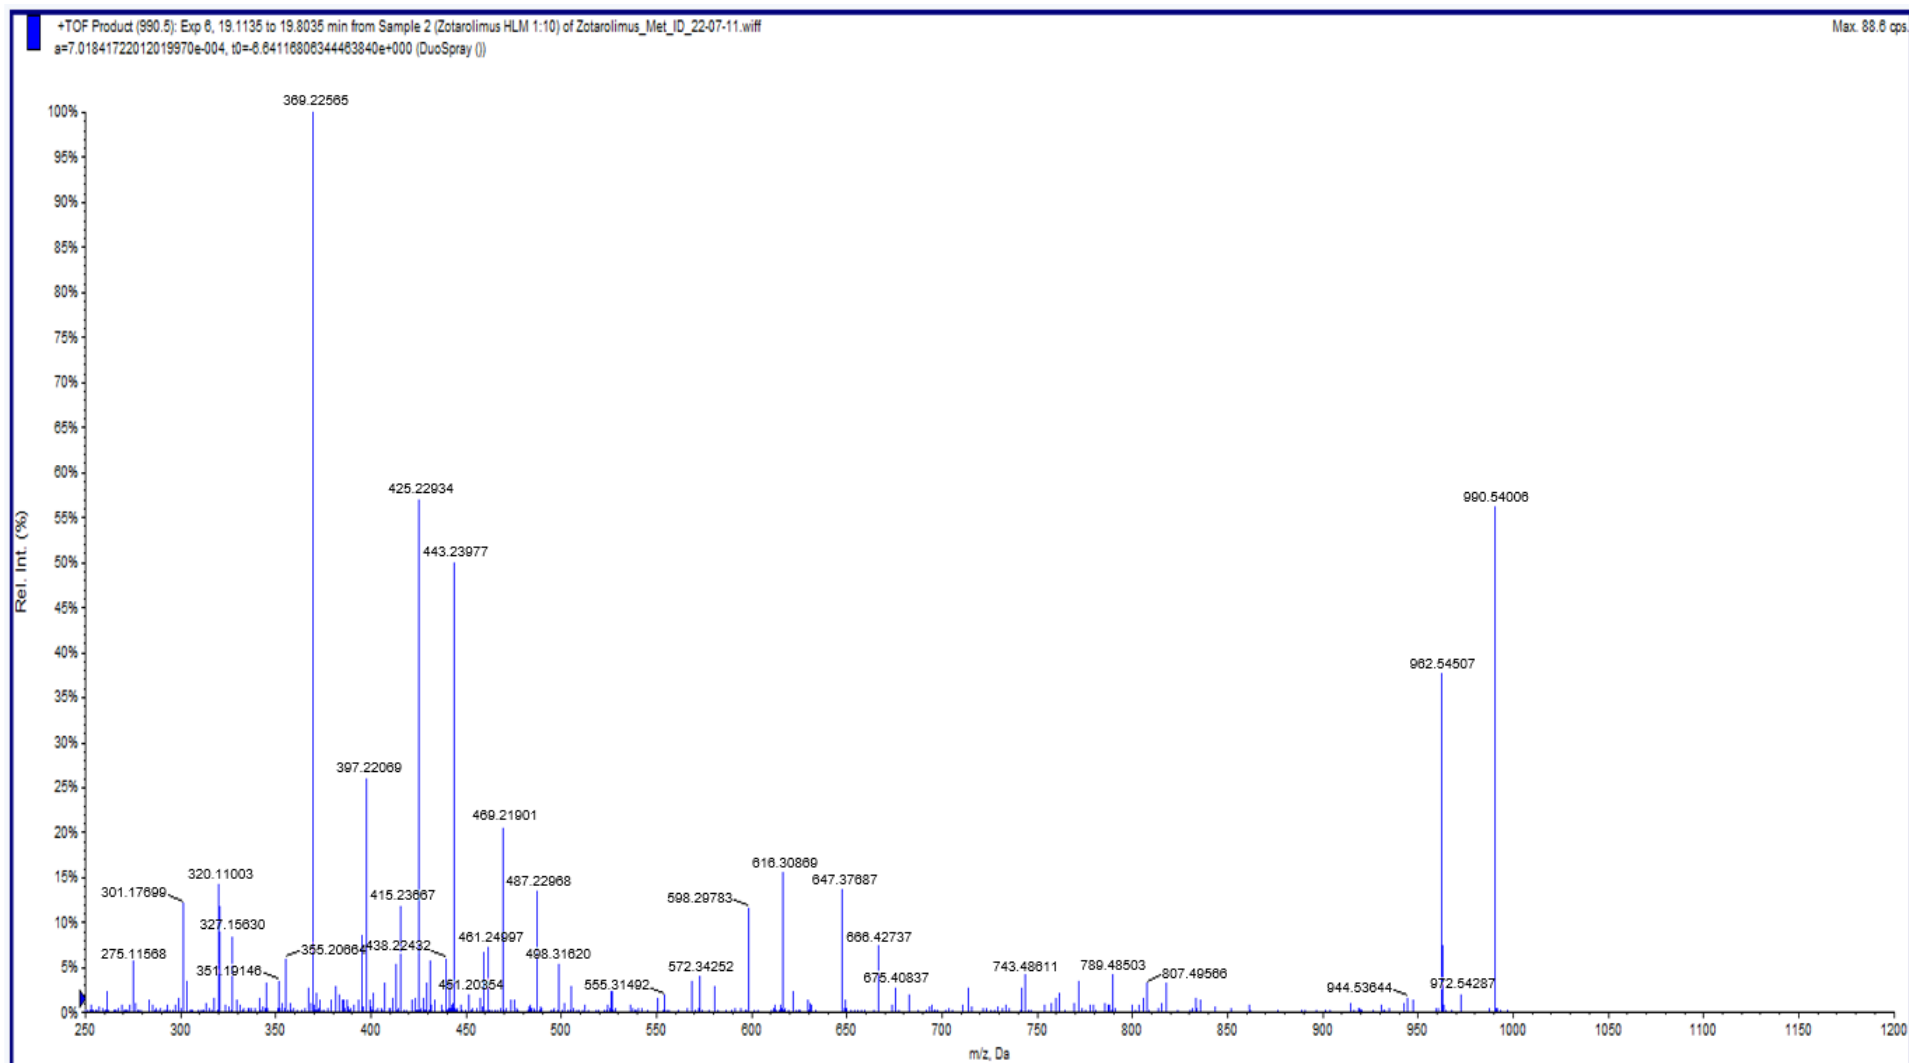

## 16-O-Desmethyl, 23-Hydroxy Zotarolimus Fragmentation Pattern

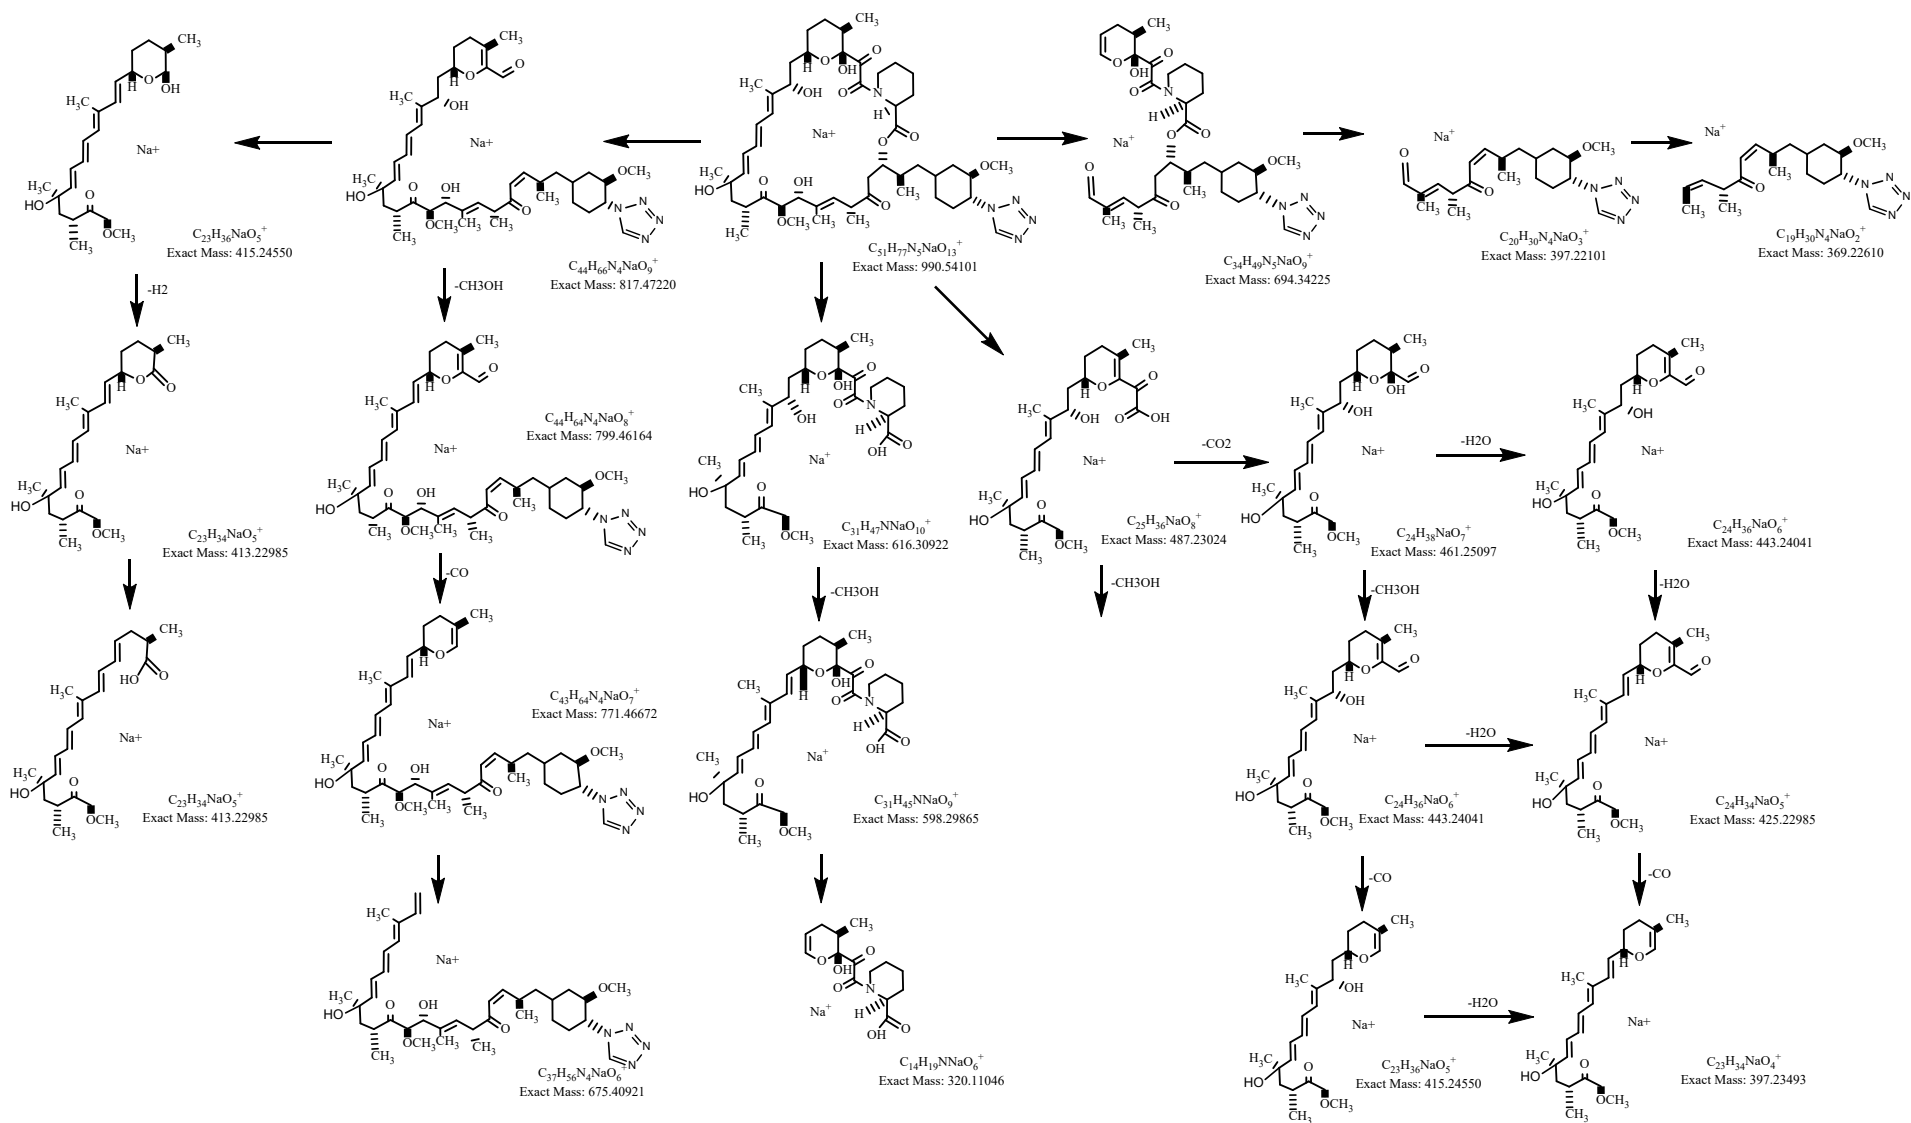

## $\Delta$ ppm of 16-O-Desmethyl, 23-Hydroxy Zotarolimus

---

| Fragment No. | Theoretical mass | Measured mass | $\Delta$ ppm |
|--------------|------------------|---------------|--------------|
| 1            | 320.11046        | 320.11003     | 1.3          |
| 2            | 369.22610        | 369.22565     | 1.2          |
| 3            | 397.22101        | 397.22069     | 0.8          |
| 4            | 425.22985        | 425.22934     | 1.2          |
| 5            | 443.24041        | 443.23977     | 1.4          |
| 6            | 461.25097        | 461.24997     | 2.2          |
| 7            | 487.23024        | 487.22968     | 1.1          |
| 8            | 598.29865        | 598.29783     | 1.4          |
| 9            | 616.30922        | 616.30869     | 0.9          |
| 10           | 647.37791        | 647.37687     | 1.6          |
| 11           | 675.40921        | 675.40837     | 1.2          |
| 12           | 817.47220        | 817.47129     | 1.1          |
| 13           | 962.54609        | 962.54507     | 1.1          |
| 14           | 990.54101        | 990.54006     | 1.0          |

# Characteristic Fragments of 16-O-desmethyl, 23-OH Zotarolimus (Water Loss)

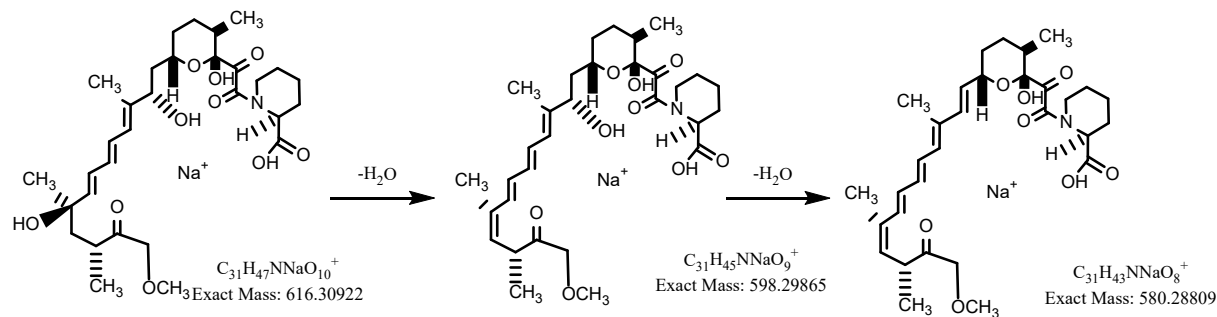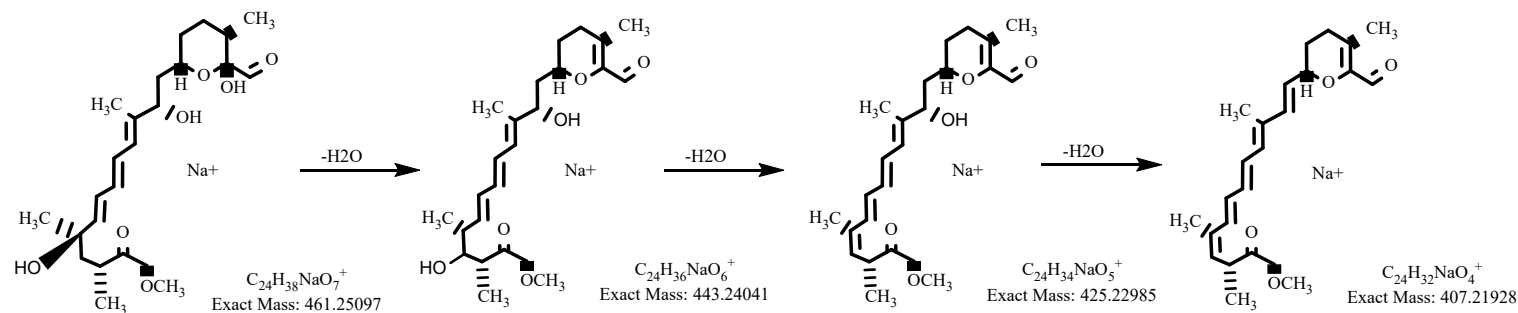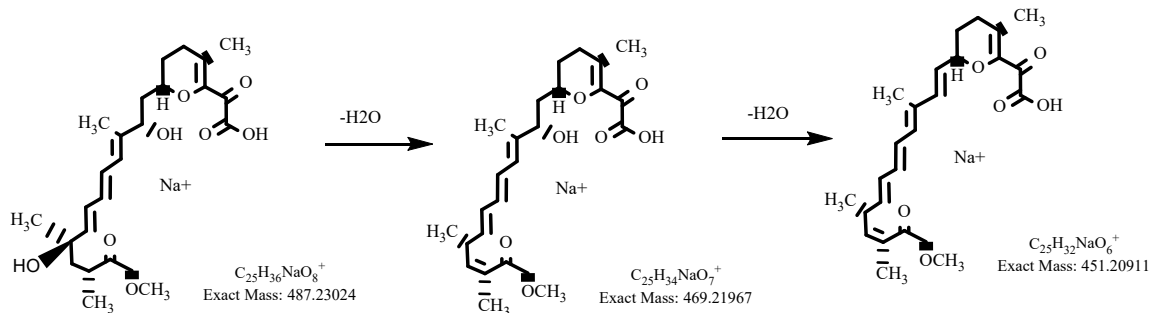



# Characteristic Fragments of 39-O-Desmethyl, 23-Hydroxy Zotarolimus

## Fragmentation Pattern

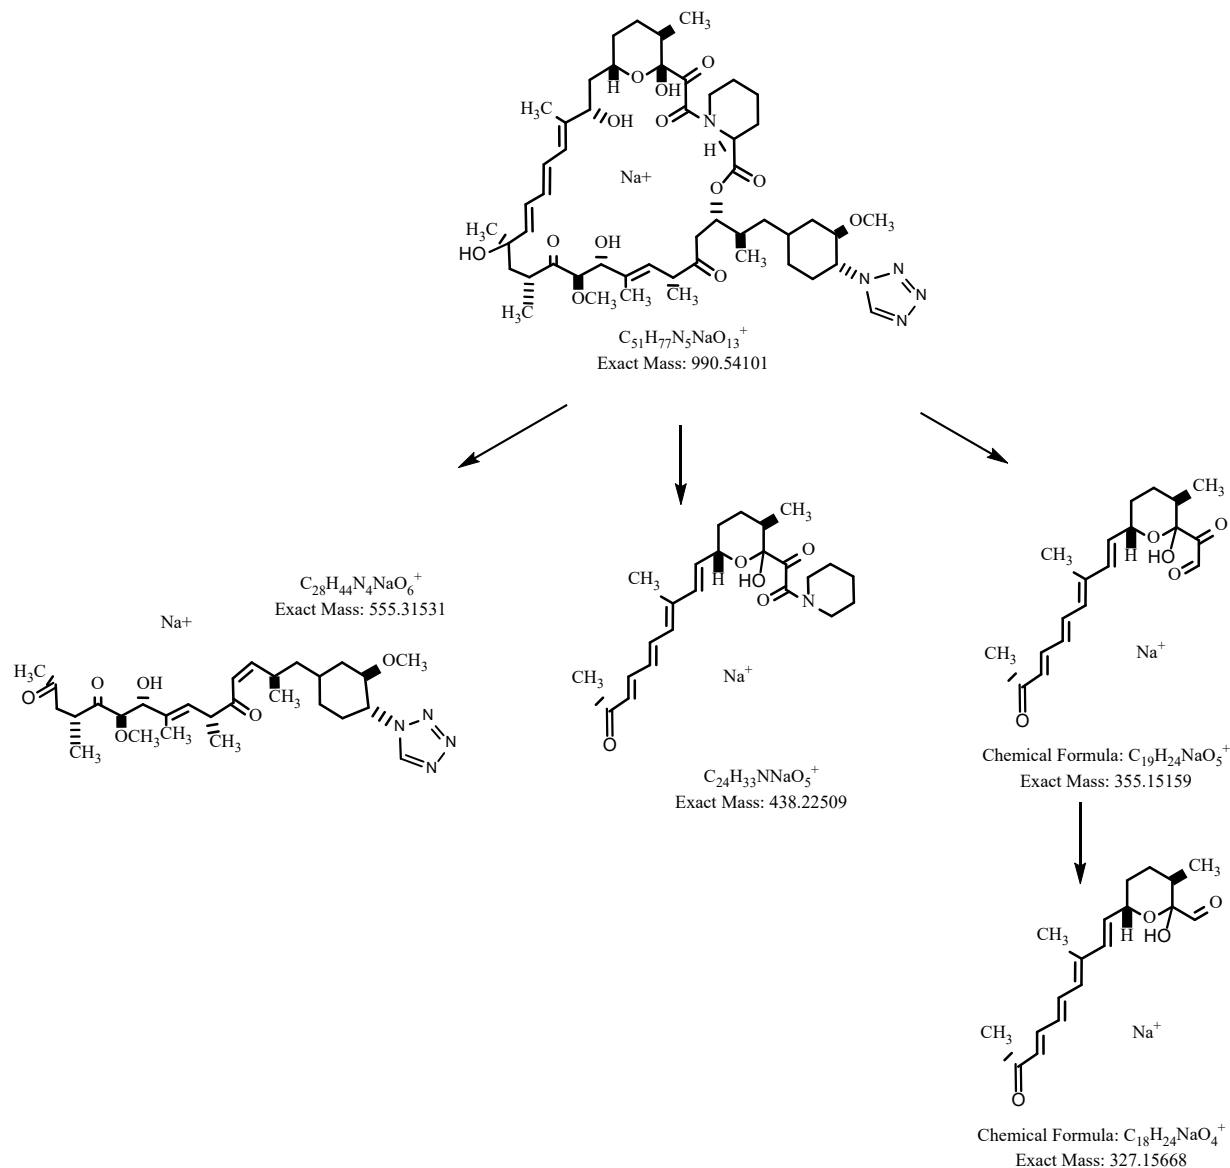

# Structural Confirmation of 16-O-Desmethyl, 24-Hydroxy Zotarolimus

| Zotarolimus Fragments    | 16-O-desmethyl, 23/24-hydroxy Zotarolimus Fragments |                                     |                                                                                                                                                                                                              |
|--------------------------|-----------------------------------------------------|-------------------------------------|--------------------------------------------------------------------------------------------------------------------------------------------------------------------------------------------------------------|
|                          |                                                     | Comments                            |                                                                                                                                                                                                              |
| 320.11046                | 320.11003                                           | no hydroxylation, no desmethylation | Rules out OH-piperidine, 11, 12, and 14-OH                                                                                                                                                                   |
| 369.22610                | 369.22586                                           | no hydroxylation, no desmethylation | Rules out 47, 48 or 49-OH and 39-O-desmethyl                                                                                                                                                                 |
| 397.22101                | 397.22069                                           | no hydroxylation, no desmethylation | Rules out 47, 48 or 49-OH and 39-O-desmethyl                                                                                                                                                                 |
| 409.23493                | 425.22934                                           | hydroxylation                       | 11, 12, 14, 23, 24,45, or 46-OH present/ 16- or 27-O-desmethyl present                                                                                                                                       |
| 427.2455                 | 443.23977                                           | hydroxylation                       | 11, 12, 14, 23, 24,45, or 46-OH present/ 16- or 27-O-desmethyl present                                                                                                                                       |
| 459.27171                | 461.24997                                           | hydroxylation & demethylation       | 11, 12, 14, 23, 24,45, or 46-OH present/ 16- or 27-O-desmethyl present                                                                                                                                       |
| 485.25097                | 487.22968                                           | hydroxylation & demethylation       | 11, 12, 14, 23, 24,45, or 46-OH present/ 16- or 27-O-desmethyl present                                                                                                                                       |
| 582.30374                | 598.29783                                           | hydroxylation                       | 11, 12, 14, 23, 24,45, or 45/46-OH, OH-Piperidine present/ 16- or 27-O-desmethyl present                                                                                                                     |
| 614.32995                | 616.30869                                           | hydroxylation & demethylation       | 11, 12, 14, 23, 24,45, or 45/46-OH, OH-Piperidine present/ 16- or 27-O-desmethyl present                                                                                                                     |
| 659.41429                | 675.40837                                           | hydroxylation                       | Rules out 11, 12, 14-OH, and OH-piperidine/ Rules out 16-O-desmethyl                                                                                                                                         |
| 815.49294                | 817.47129                                           | hydroxylation & demethylation       | 11, 12, 14, 23, 23, 24,45, 46, 47, 48 or 49-OH present/ 16- or 27-O-desmethyl                                                                                                                                |
| 988.56174                | 990.54006                                           | hydroxylation & demethylation       |                                                                                                                                                                                                              |
| Characteristic Fragments |                                                     | 327, 355, 438, 451, 555, 598, 616   | 451 due to water loss of 469 confirms 27-O-desmethyl zotarolimus (no water loss would be possible if 27-O-desmethyl presents).<br>Characteristic fragment for water loss (616 -18 = 598 m/z) of 23 and 24-OH |
| Determinant patterns     |                                                     | Water Loss                          | The hydroxylation of 23 and 24-OH located near the conjugated triene energetically favor the loss of water.                                                                                                  |

# 39-O-Desmethyl, 23/24-Hydroxy Zotarolimus, m/z = 990.54101

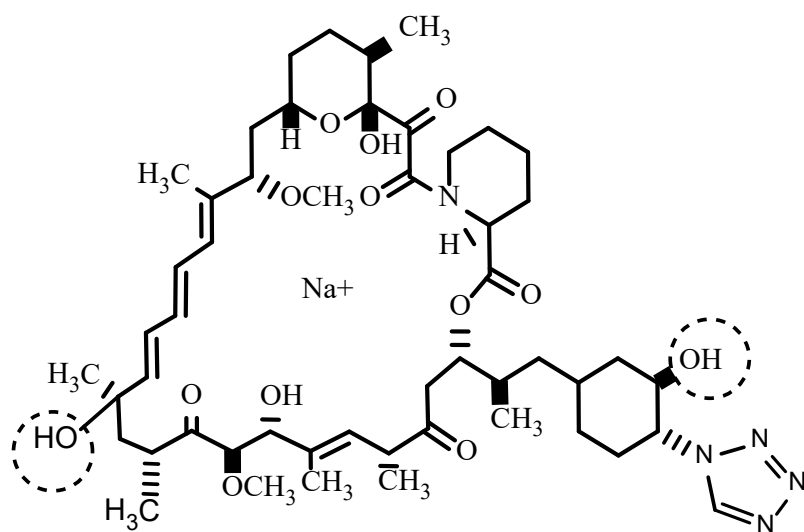

$C_{51}H_{77}N_5NaO_{13}^+$   
Exact Mass: 990.54101

39-O-Desmethyl, 23-Hydroxy Zotarolimus

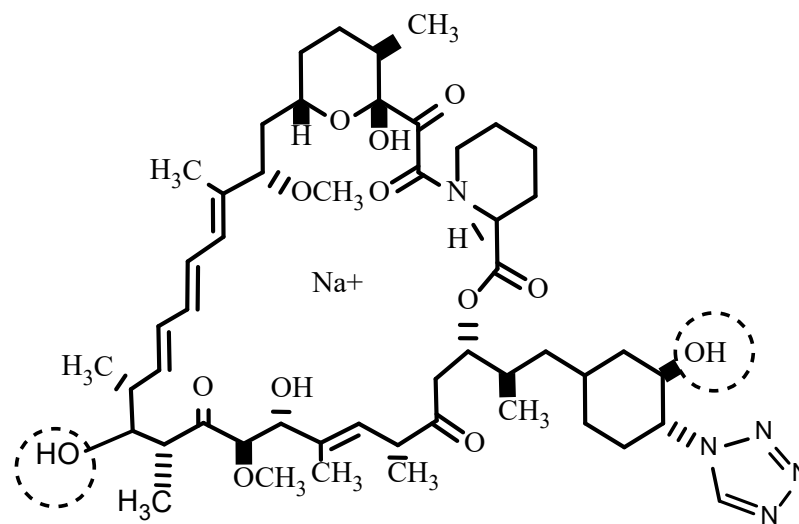

$C_{51}H_{77}N_5NaO_{13}^+$   
Exact Mass: 990.54101

39-O-Desmethyl, 24-Hydroxy Zotarolimus

# 39-O-Desmethyl, 23/24-Hydroxy Zotarolimus, m/z = 990.54101

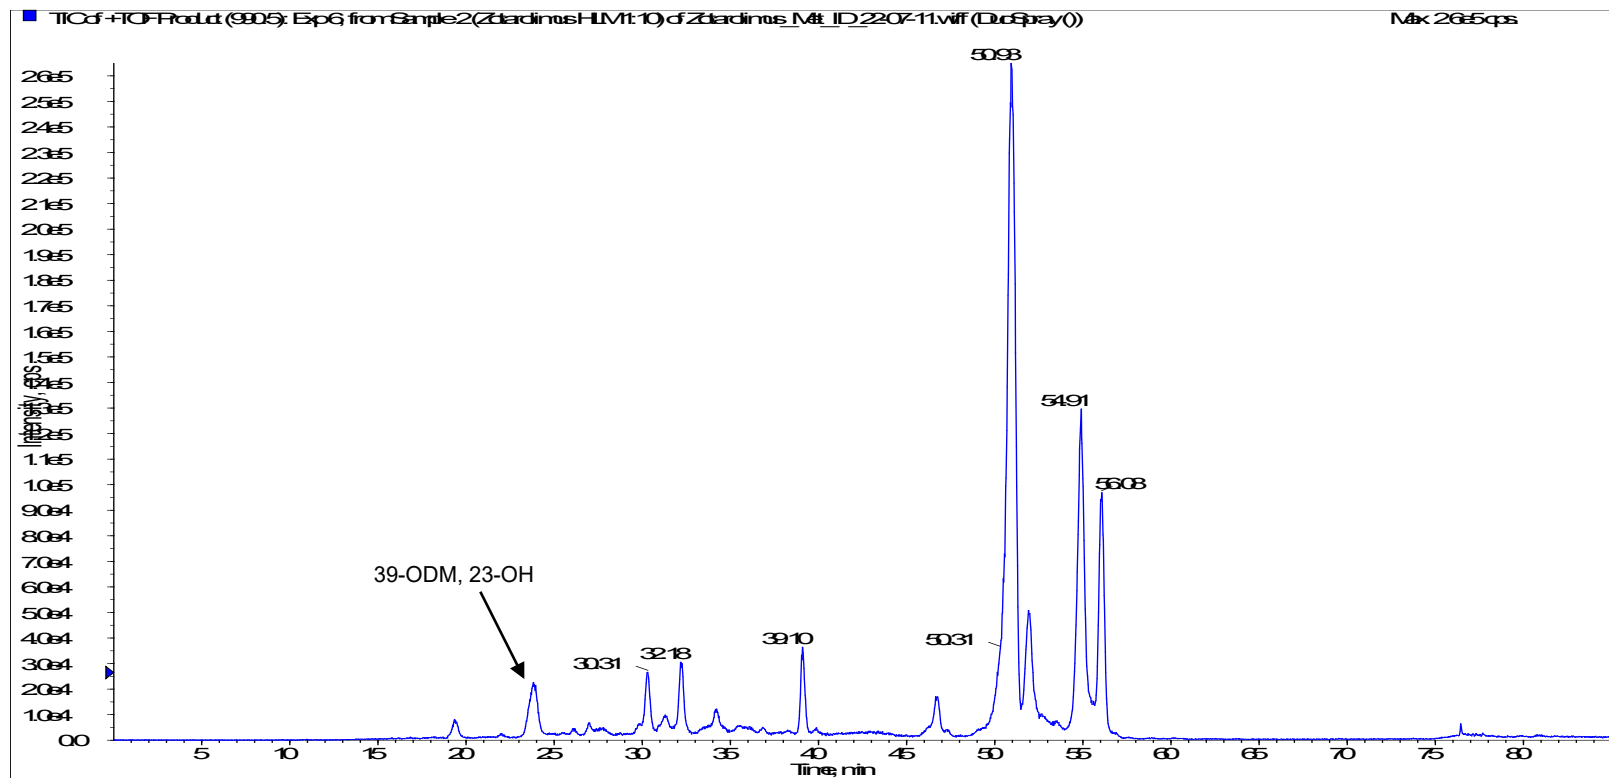

# 39-O-Desmethyl, 23/24-Hydroxy Zotarolimus , m/z = 990.54101

+TOF Product (990.5): Exp 8, 23.4222 to 24.2806 min from Sample 2 (Zotarolimus HLM 1:10) of Zotarolimus\_Met\_ID\_22-07-11.wiff  
a=7.01841722012019970e-004, t0=-8.64118806344463840e+000 (DuoSpray (I))

Max. 241.3 cps

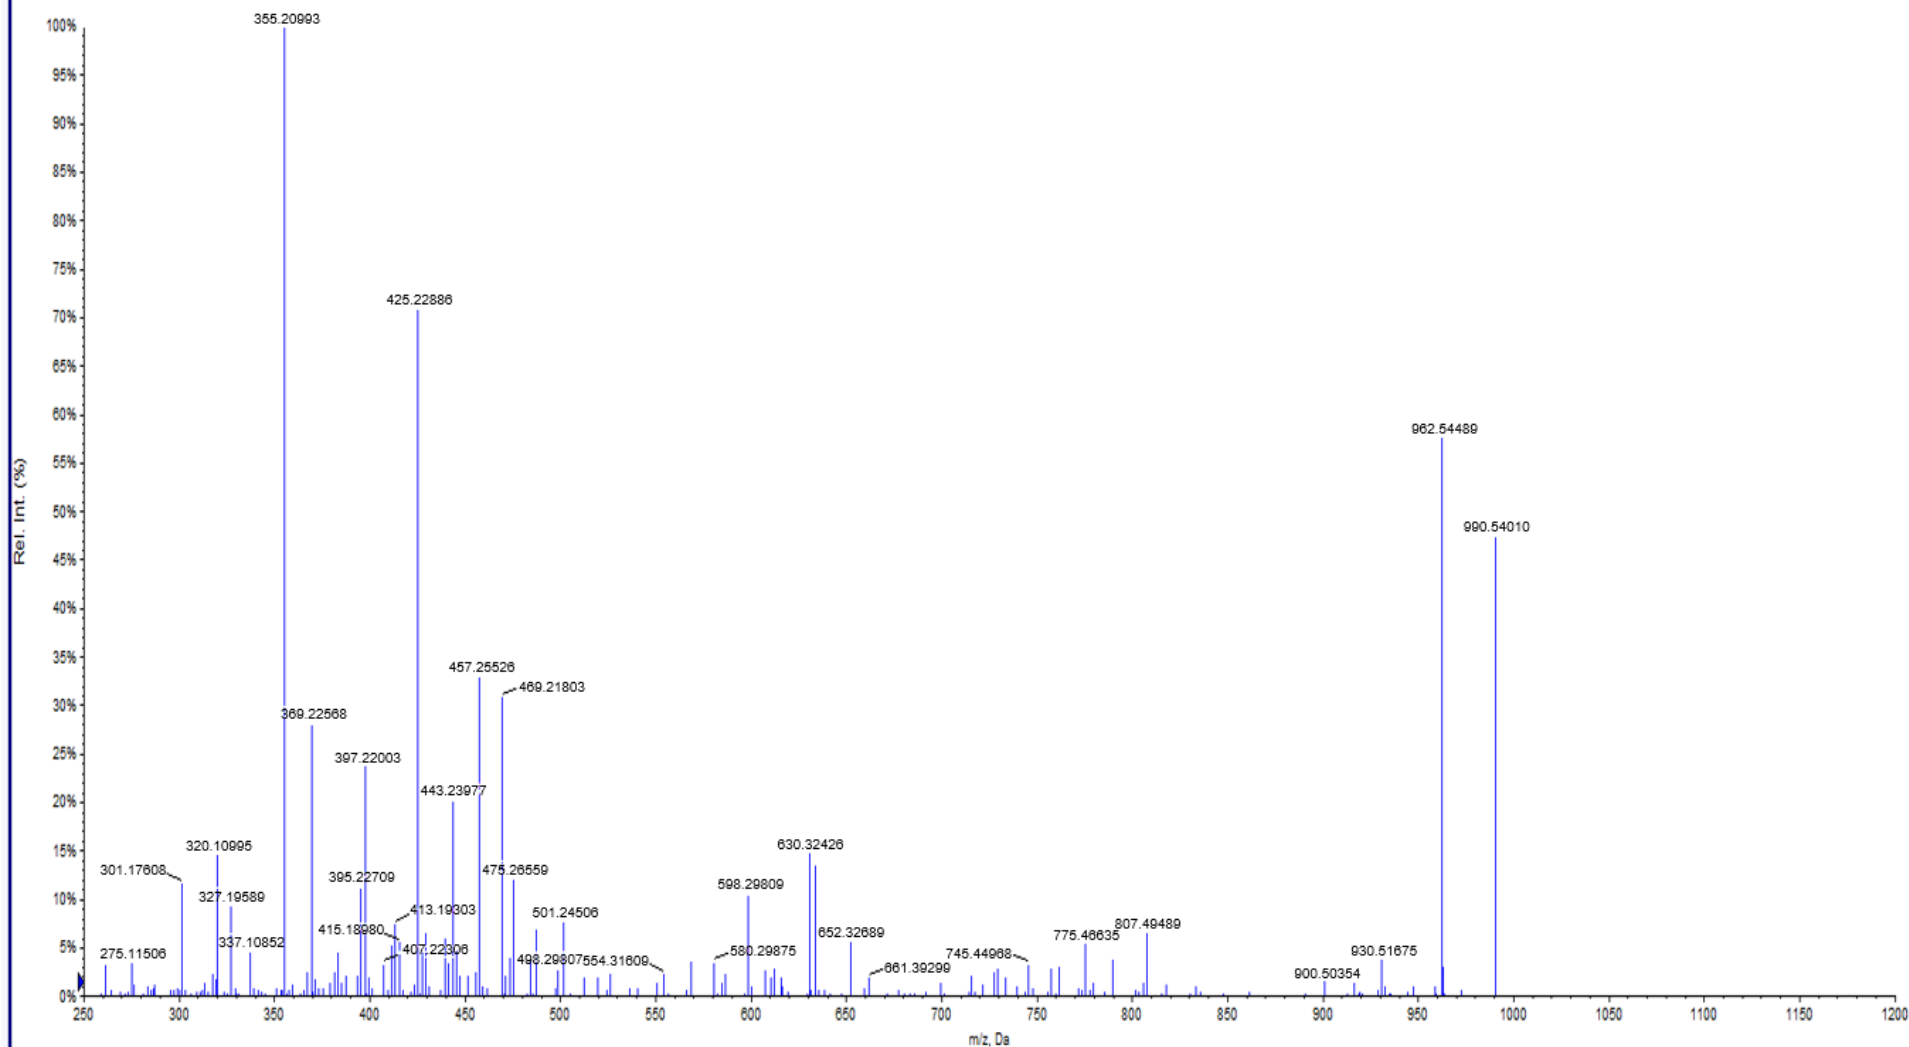

# 39-O-Desmethyl, 23-Hydroxy Zotarolimus Fragmentation Pattern

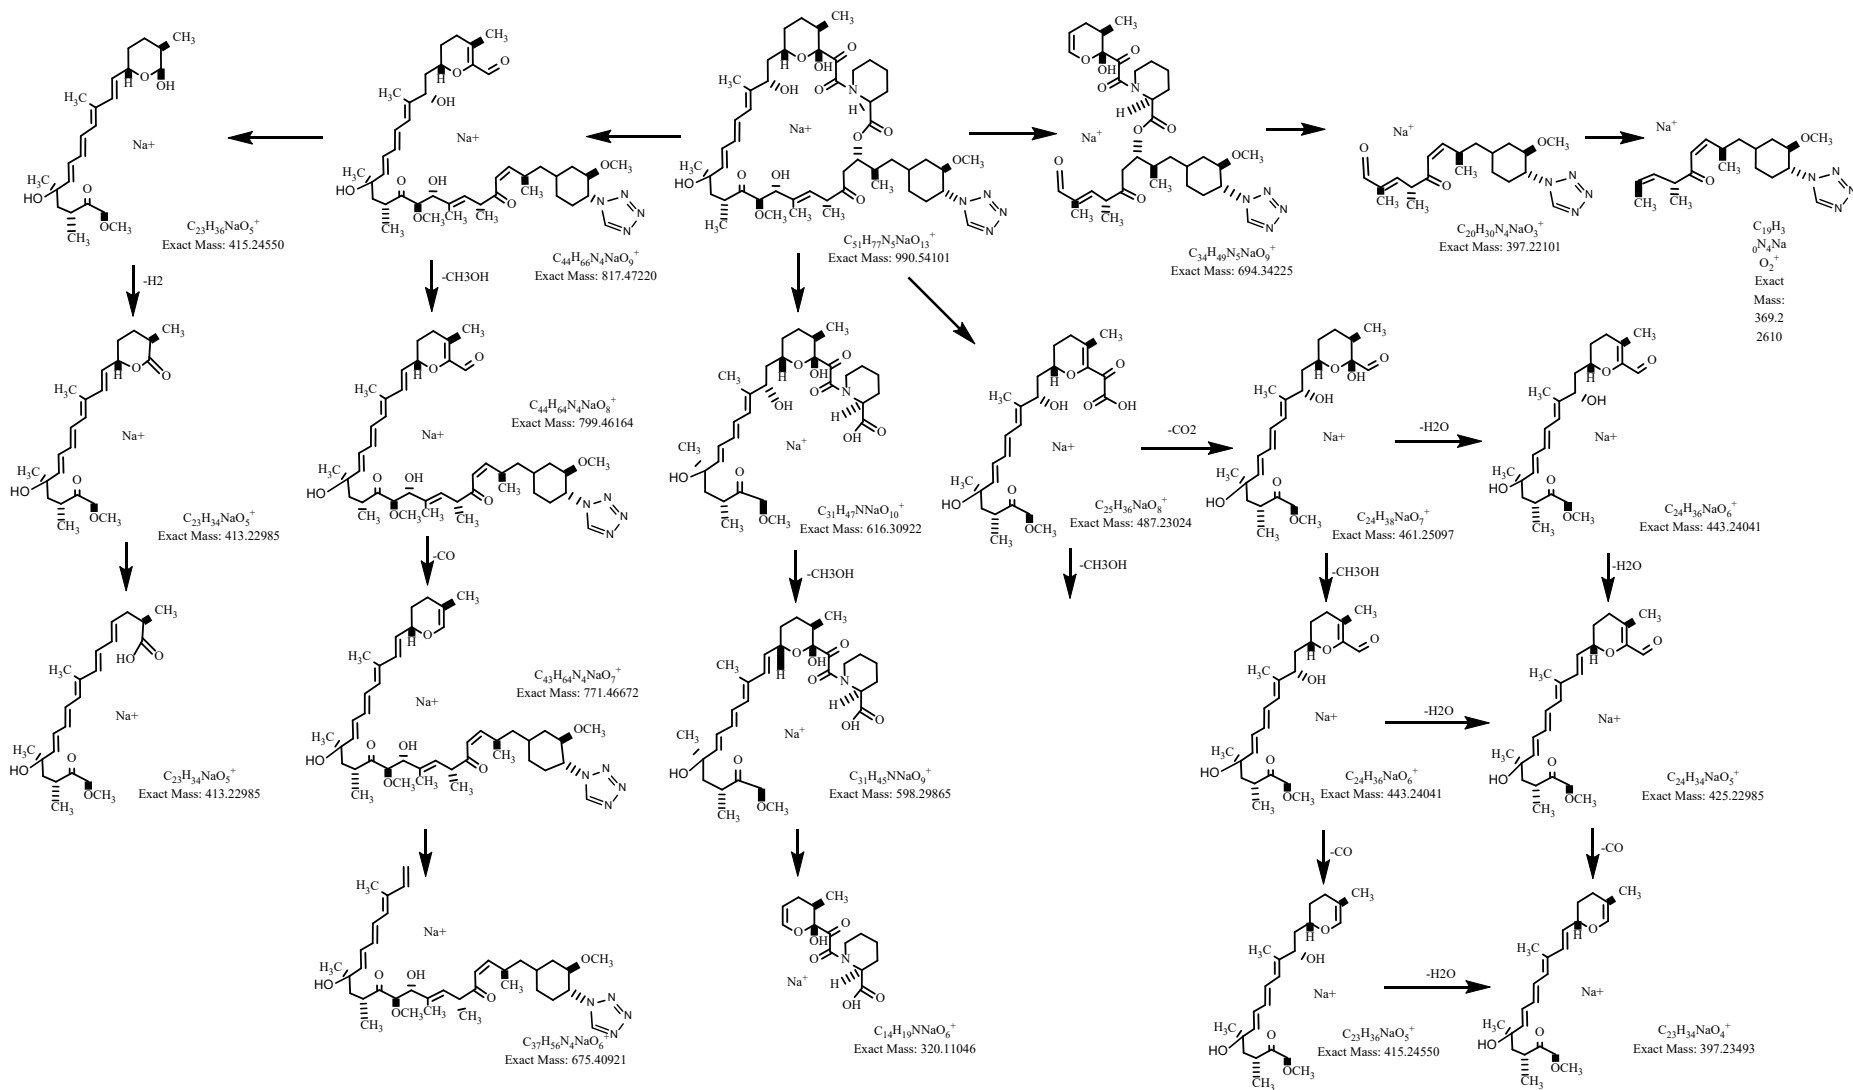

## $\Delta$ ppm of 39-O-Desmethyl, 23/24-Hydroxy Zotarolimus

---

| Fragment No. | Theoretical mass | Measured mass | $\Delta$ ppm |
|--------------|------------------|---------------|--------------|
| 1            | 320.11046        | 320.10995     | 1.6          |
| 2            | 355.21045        | 355.20993     | 1.5          |
| 3            | 369.22610        | 369.22568     | 1.1          |
| 4            | 397.22101        | 397.22003     | 2.5          |
| 5            | 425.22985        | 425.22886     | 2.3          |
| 6            | 443.24041        | 443.23977     | 1.4          |
| 7            | 457.25606        | 457.25526     | 1.7          |
| 8            | 469.21967        | 469.21803     | 3.5          |
| 9            | 475.26662        | 475.26559     | 2.2          |
| 10           | 501.24589        | 501.24506     | 1.7          |
| 11           | 598.29865        | 598.29809     | 0.9          |
| 12           | 630.32487        | 630.32426     | 1.0          |
| 13           | 661.39356        | 661.39299     | 0.9          |
| 14           | 757.45107        | 757.45008     | 1.3          |
| 15           | 990.54101        | 990.54010     | 0.9          |

# Characteristic Fragments of 39-O-desmethyl, 23-OH Zotarolimus (Water Loss)

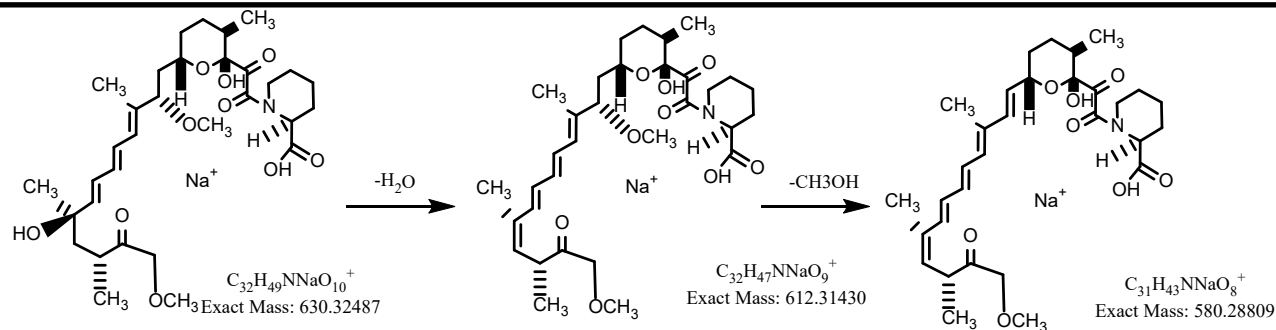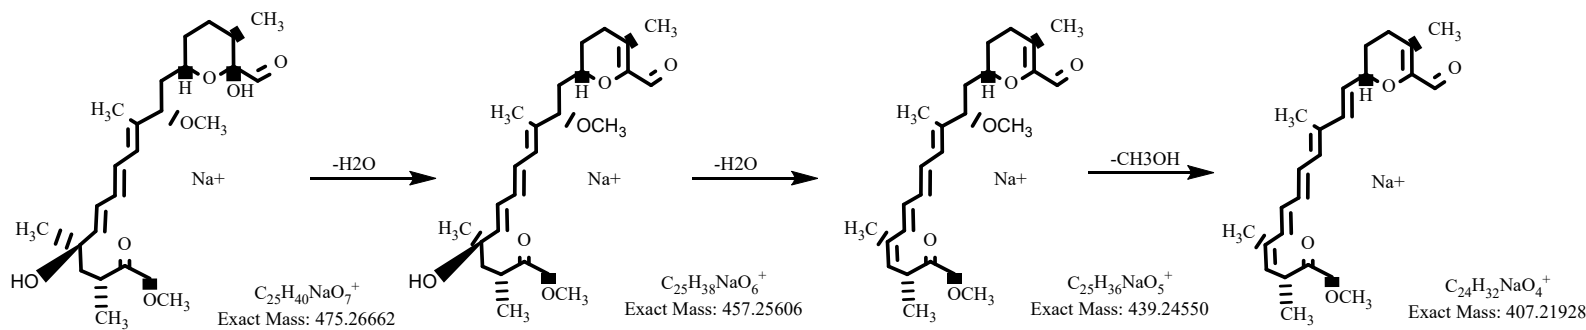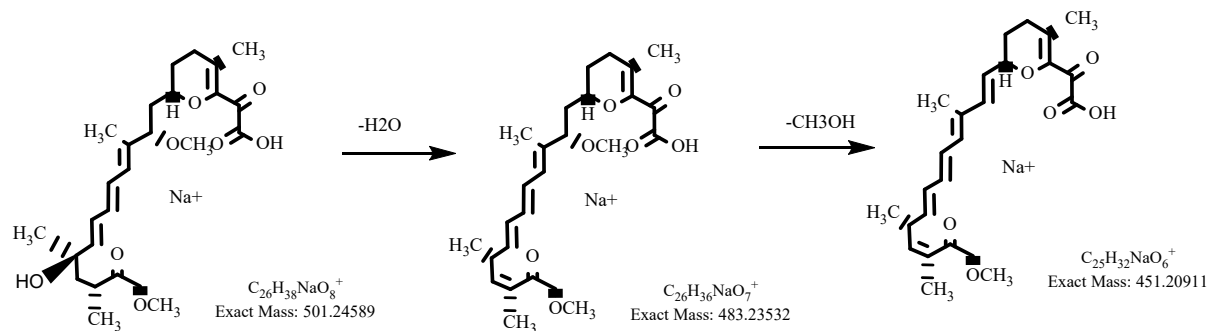



# Characteristic Fragments of 39-O-desmethyl, 23-OH vs 24-OH Zotarolimus

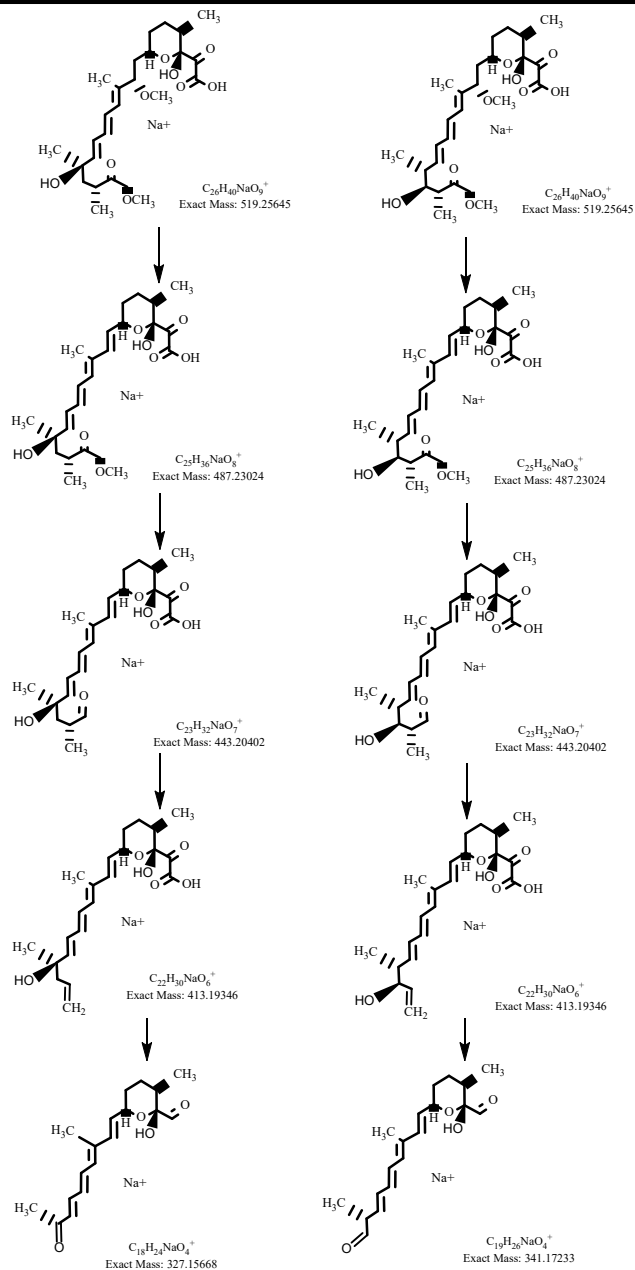

# Structural Confirmation of 39-O-Desmethyl, 23-Hydroxy Zotarolimus

| Zotarolimus Fragments    | 39-O-desmethyl, 23/24-hydroxy Zotarolimus Fragments | Comments                            |                                                                                                                                              |
|--------------------------|-----------------------------------------------------|-------------------------------------|----------------------------------------------------------------------------------------------------------------------------------------------|
|                          |                                                     |                                     |                                                                                                                                              |
| 320.11046                | 320.10995                                           | no hydroxylation, no desmethylation | Rules out OH-pipredine, 11, 12, and 14-OH                                                                                                    |
| 369.22610                | 355.20993                                           | desmethylation                      | Confirms 39-O-desmethyl                                                                                                                      |
| 381.24002                | 397.22003                                           | hydroxylation                       | 11, 12, 14, 23, 24,45, or 46-OH present                                                                                                      |
| 409.23493                | 425.22886                                           | hydroxylation                       | 11, 12, 14, 23, 24,45, or 46-OH present                                                                                                      |
| 427.2455                 | 443.23977                                           | hydroxylation                       | 11, 12, 14, 23, 24,45, or 46-OH present                                                                                                      |
| 459.27171                | 475.26559                                           | hydroxylation                       | 11, 12, 14, 23, 24, 45, or 45/46-OH present/ Rules out 16- and 27-O-desmethyl                                                                |
| 485.25097                | 501.24506                                           | hydroxylation                       | 11, 12, 14, 23, 24, 45, or 45/46-OH present/ Rules out 16- and 27-O-desmethyl                                                                |
| 582.30374                | 598.29809                                           | hydroxylation                       | 11, 12, 14, 23, 24, 45, or 45/46-OH present/ Rules out 27-O-desmethyl                                                                        |
| 614.32995                | 630.32426                                           | hydroxylation                       | 11, 12, 14, 23, 24, 45, or 45/46-OH present/ Rules out 16- and 27-O-desmethyl                                                                |
| 659.41429                | 661.39299                                           | hydroxylation                       | Rules out 11, 12, 14-OH, and OH-piperidine                                                                                                   |
| 755.47181                | 757.45008                                           | hydroxylation, desmethylation       | 11, 12, 14, 23, 24,45, or 45/46-OH present/ 16- 27-. or 39-O-desmethyl                                                                       |
| 988.56174                | 990.54010                                           | demethylation                       |                                                                                                                                              |
| Characteristic Fragments |                                                     | 327.15668 fragments confirms 23-OH  | 451 due to methanol loss of 501 Rules out 16-O-desmethyl zotarolimus<br>425 due to methanol loss of 457 Rules out 16-O-desmethyl zotarolimus |
| Determinant patterns     |                                                     |                                     | Additional water loss for 23/24-OH                                                                                                           |

39-O-Desmethyl, 24-Hydroxy Zotarolimus, m/z = 990.54101

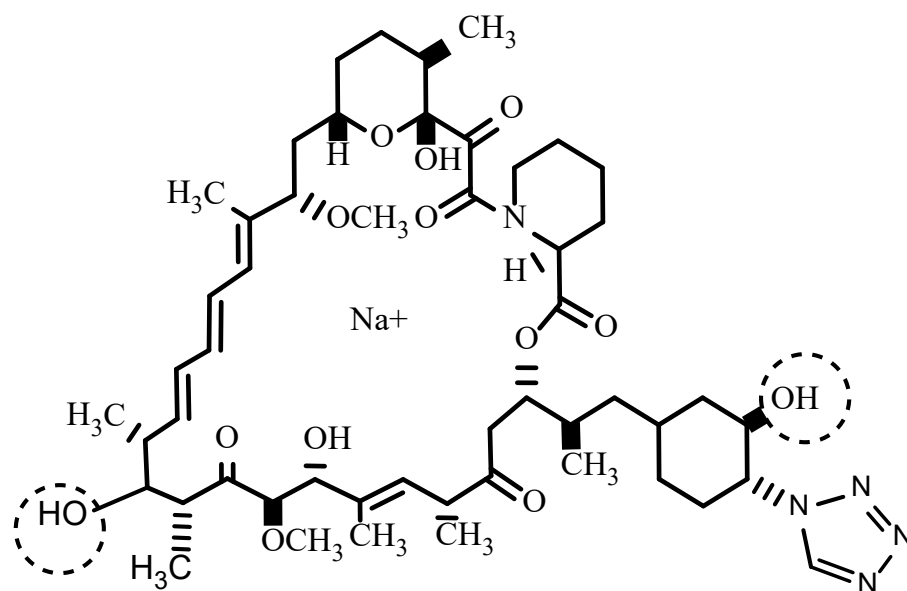

$C_{51}H_{77}N_5NaO_{13}^+$   
Exact Mass: 990.54101

# 39-O-Desmethyl, 24-Hydroxy Zotarolimus Metabolites, m/z = 990.54101

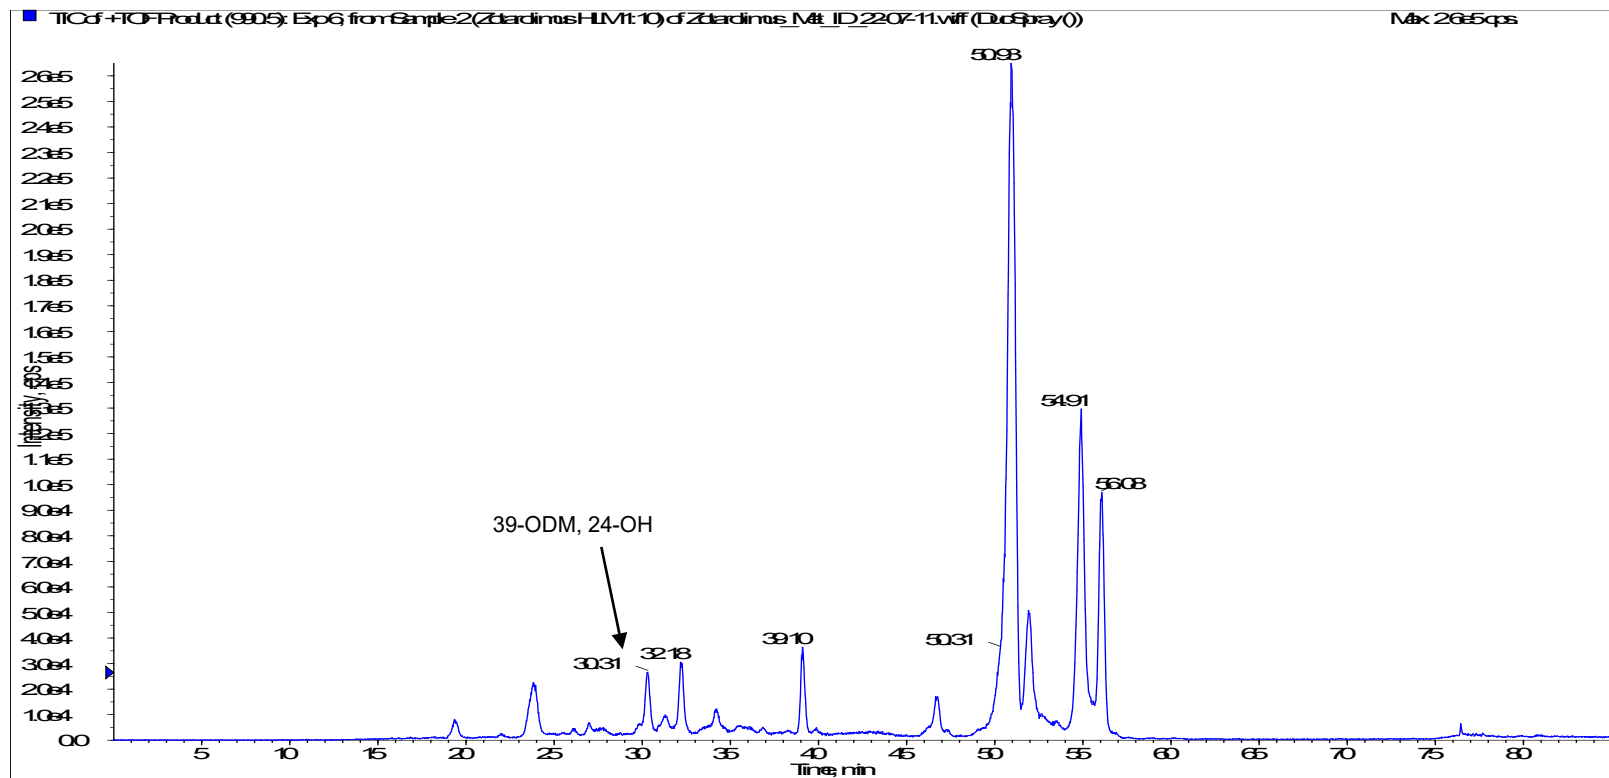

# 39-O-Desmethyl, 24-Hydroxy Zotarolimus $m/z = 990.54101$

## Extracted Ion Chromatogram (EIC)

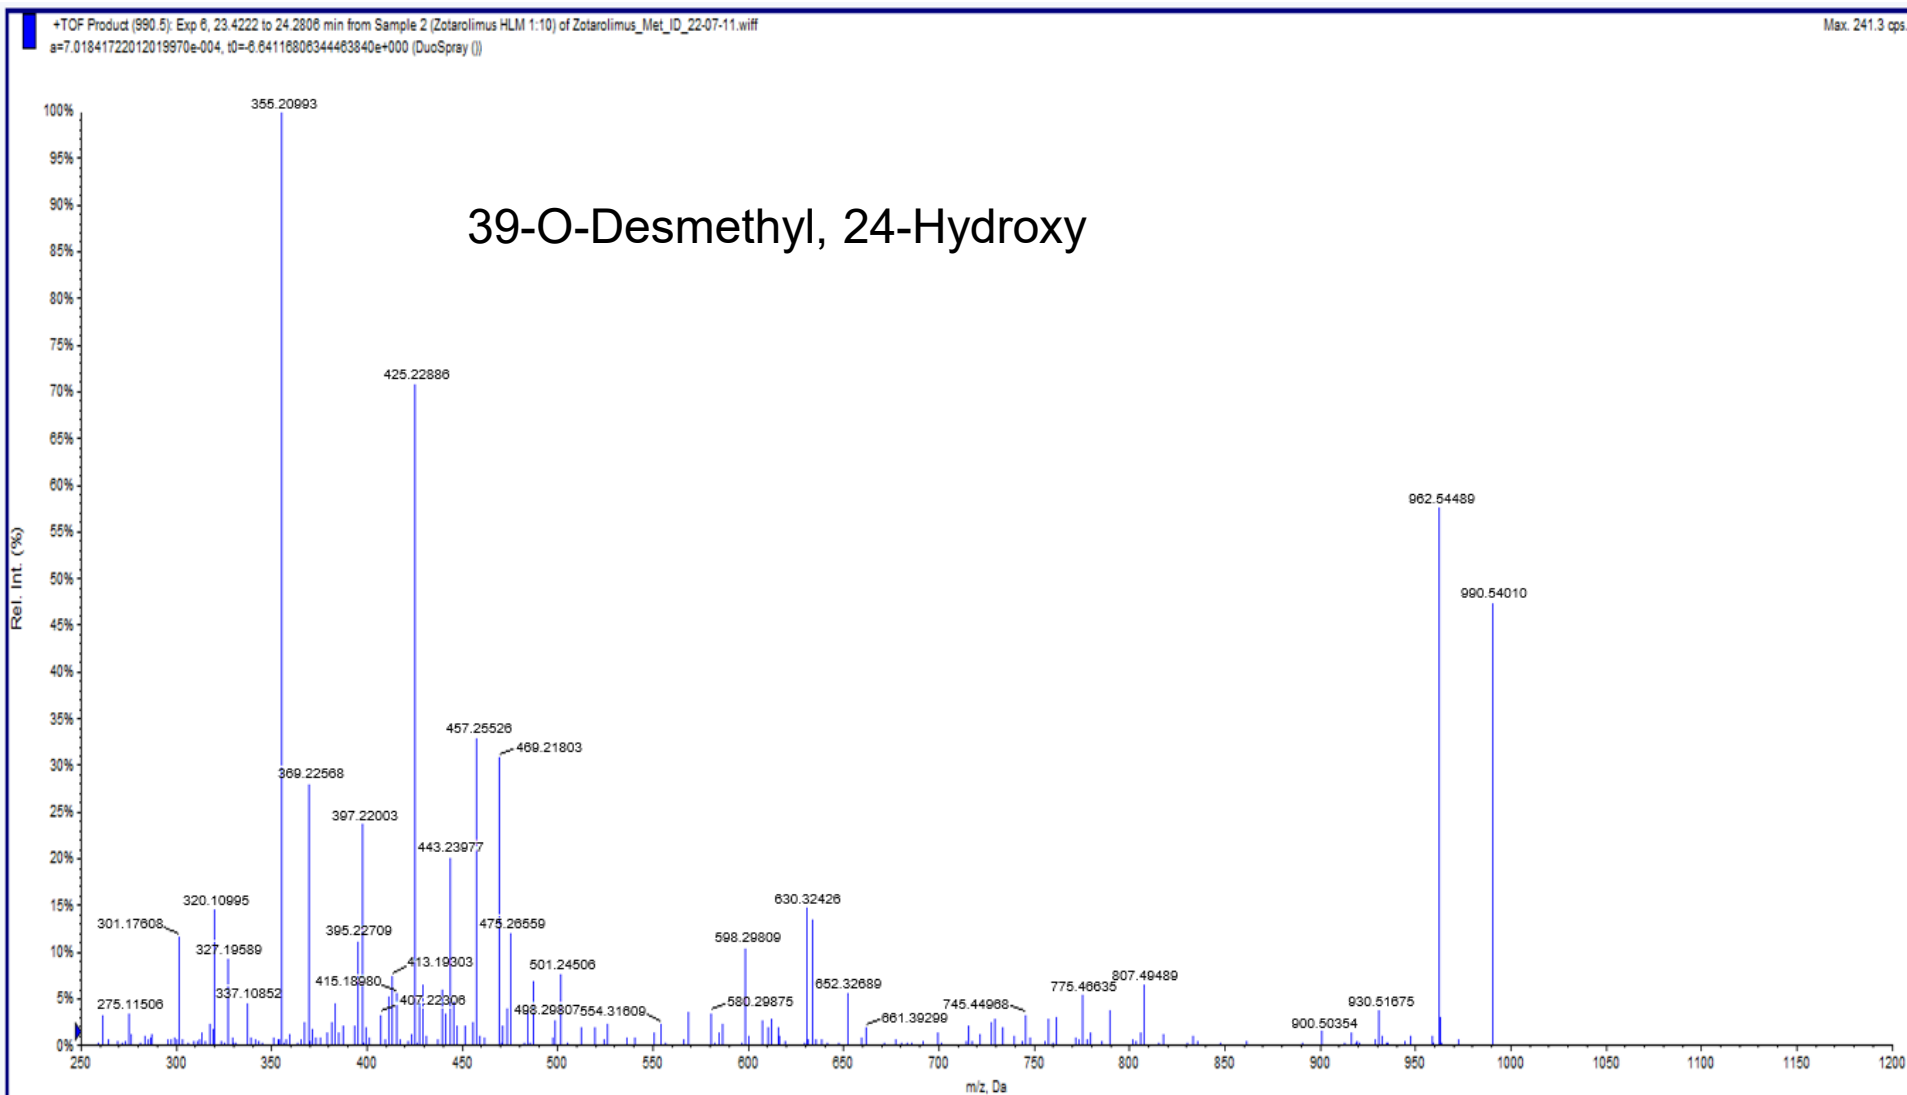

# 39-O-Desmethyl, 24-Hydroxy Zotarolimus Fragmentation Pattern

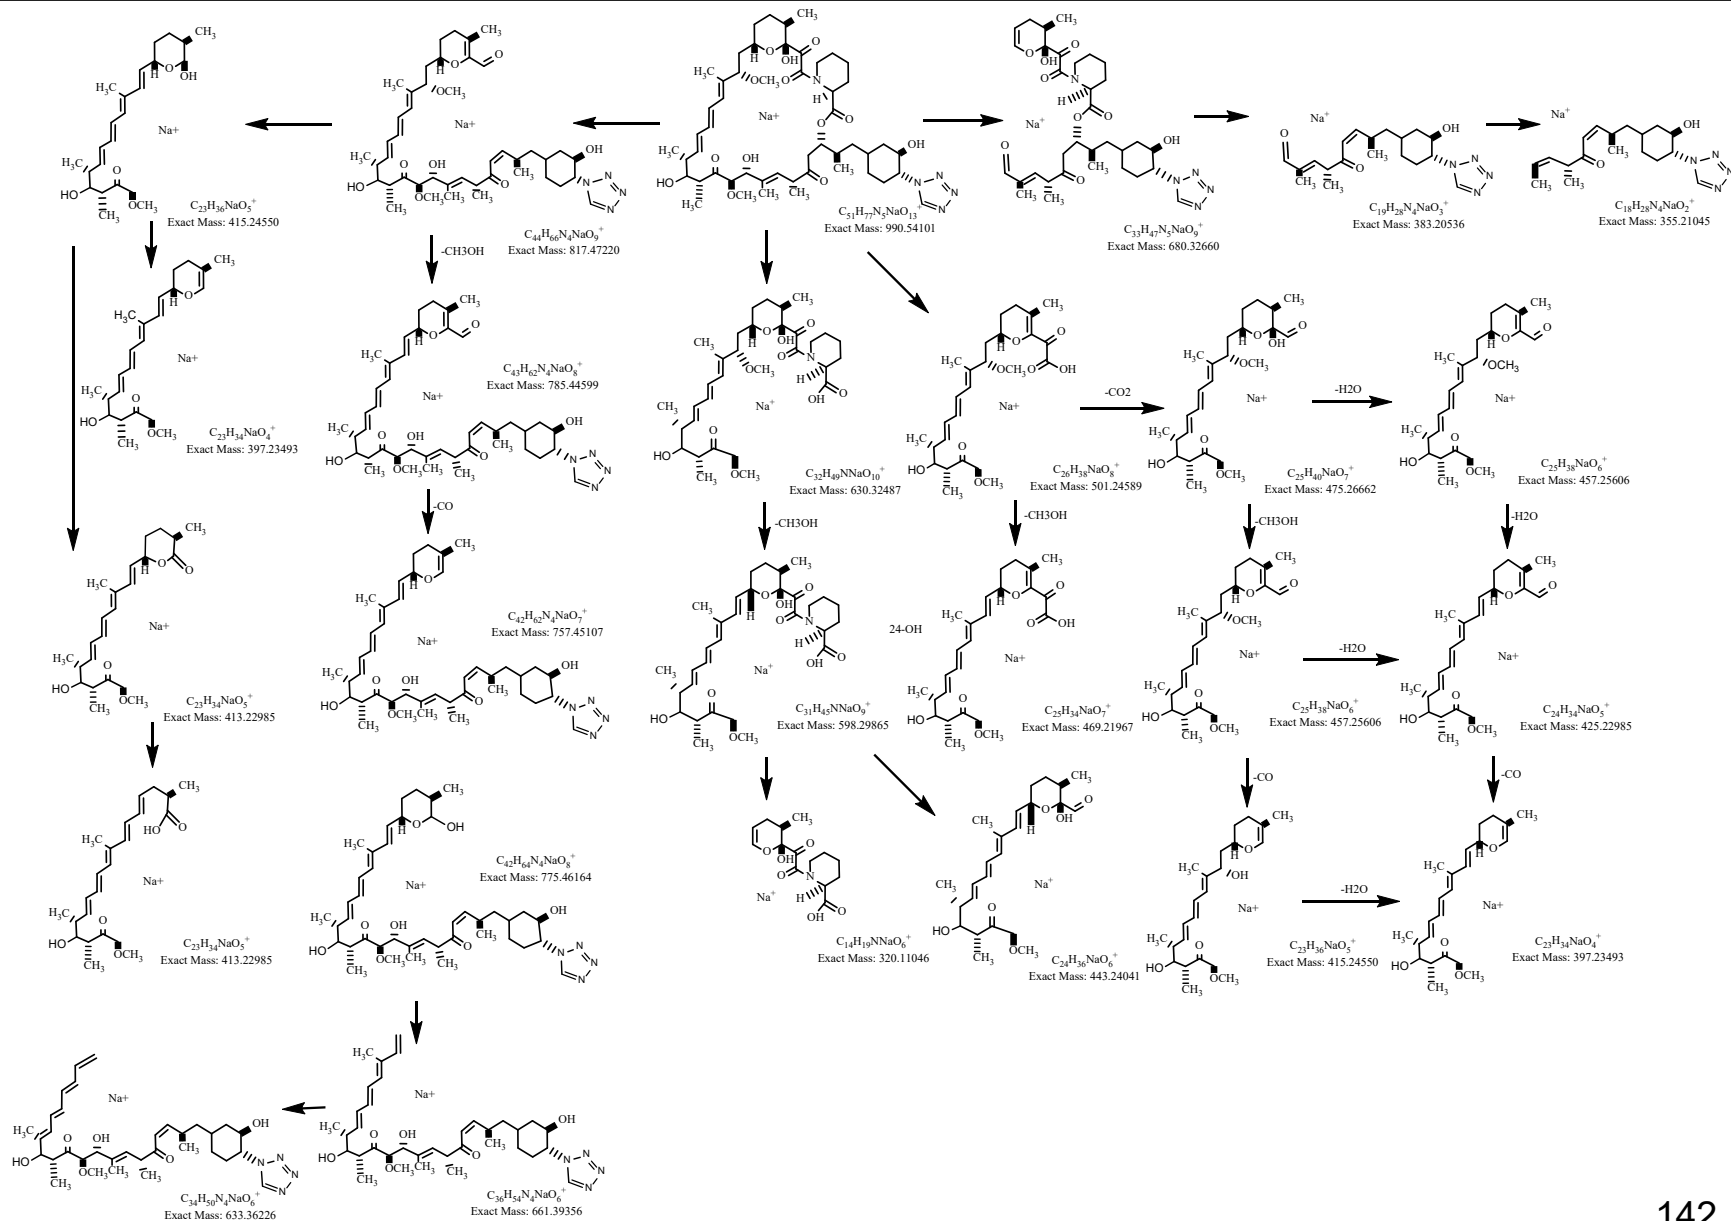

# Characteristic Fragments of 39-O-desmethyl, 24-OH Zotarolimus

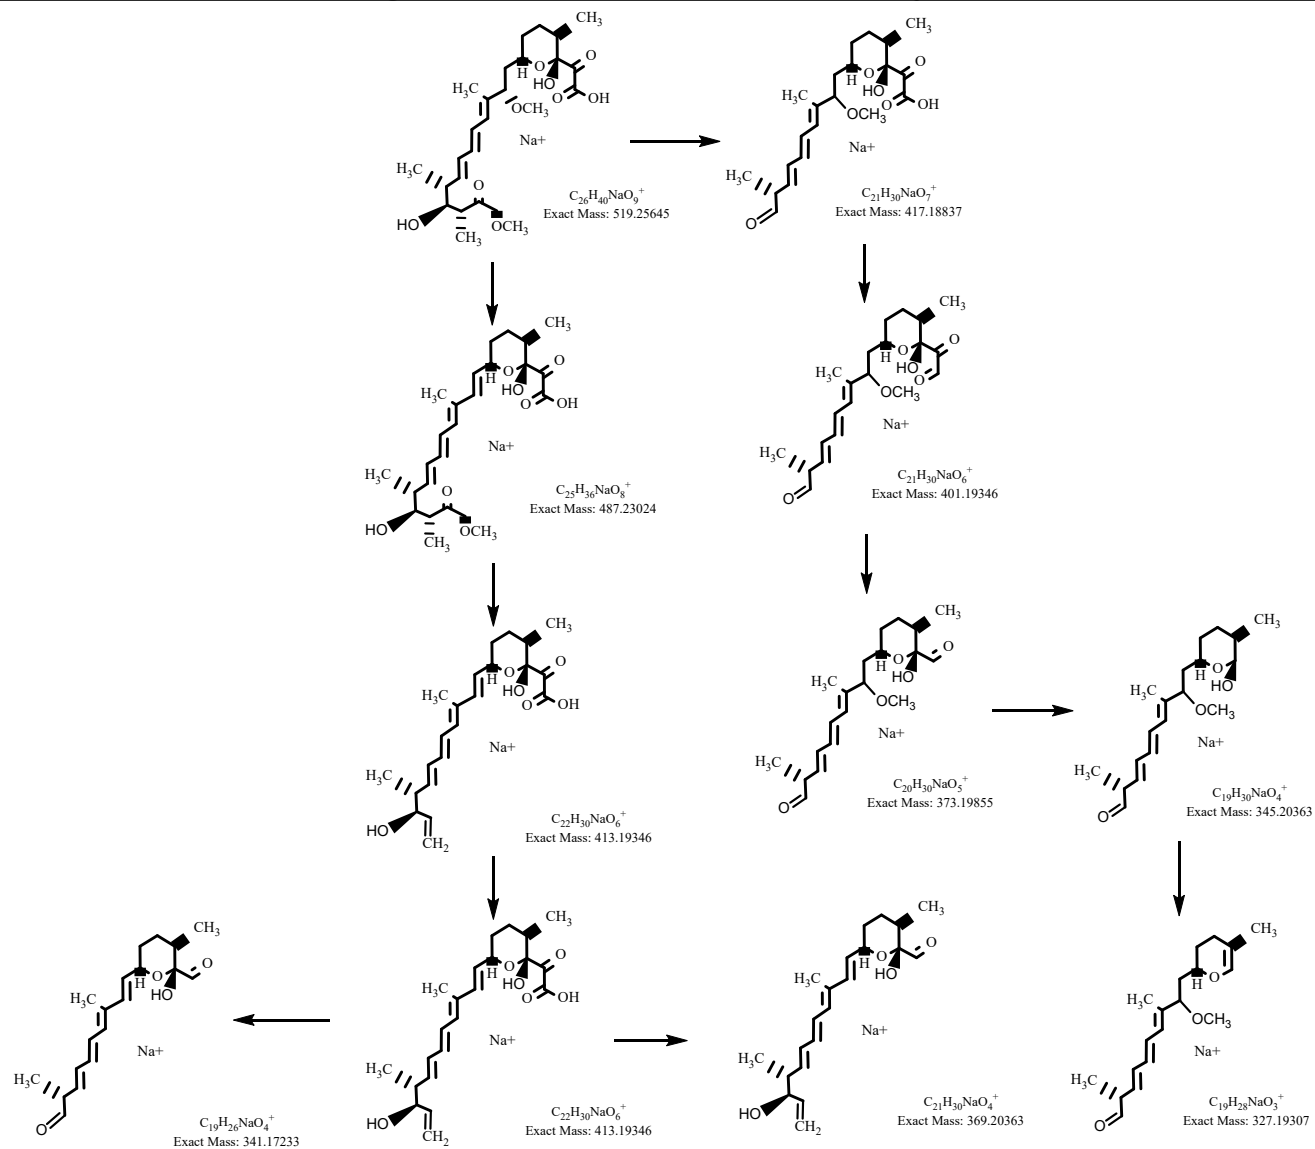

## $\Delta$ ppm of 39-O-Desmethyl, 24-Hydroxy Zotarolimus

---

| Theoretical mass | Measured mass | $\Delta$ ppm |
|------------------|---------------|--------------|
| 320.11046        | 320.10999     | 1.5          |
| 355.21045        | 355.21005     | 1.1          |
| 369.22610        | 369.22577     | 0.9          |
| 397.22101        | 397.22069     | 0.8          |
| 425.22985        | 425.22899     | 2.0          |
| 443.24041        | 443.23993     | 1.1          |
| 457.25606        | 457.25544     | 1.4          |
| 469.21967        | 469.21838     | 2.7          |
| 475.26662        | 475.26577     | 1.8          |
| 501.24589        | 501.24520     | 1.4          |
| 598.29865        | 598.29811     | 0.9          |
| 630.32487        | 630.32469     | 0.3          |
| 661.39356        | 661.39303     | 0.8          |
| 757.45107        | 757.45044     | 0.8          |
| 990.54101        | 990.54036     | 0.7          |



# Characteristic Fragments of 39-O-desmethyl, 24-OH Zotarolimus (Water Loss)

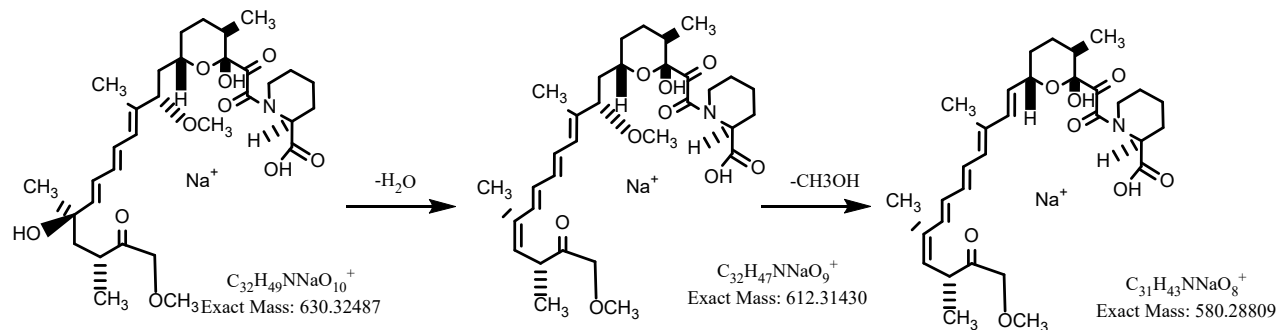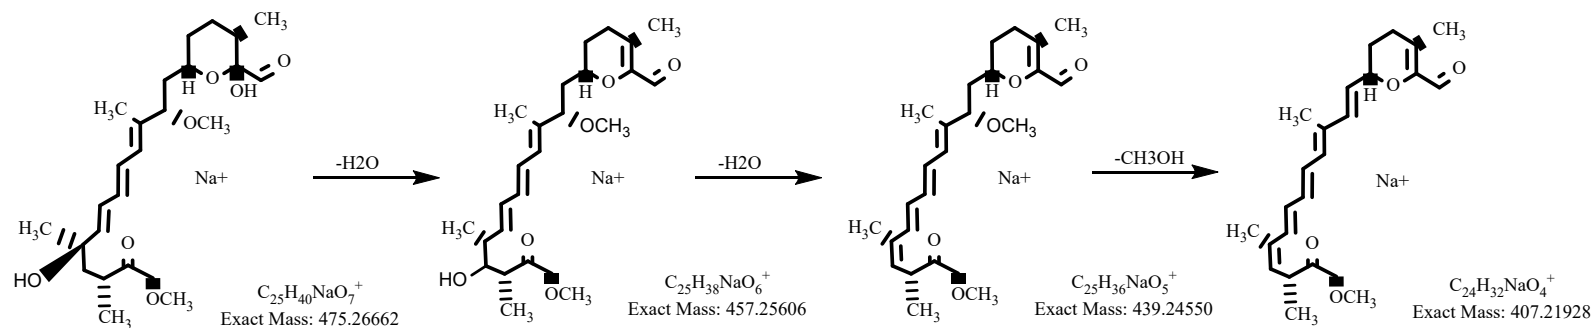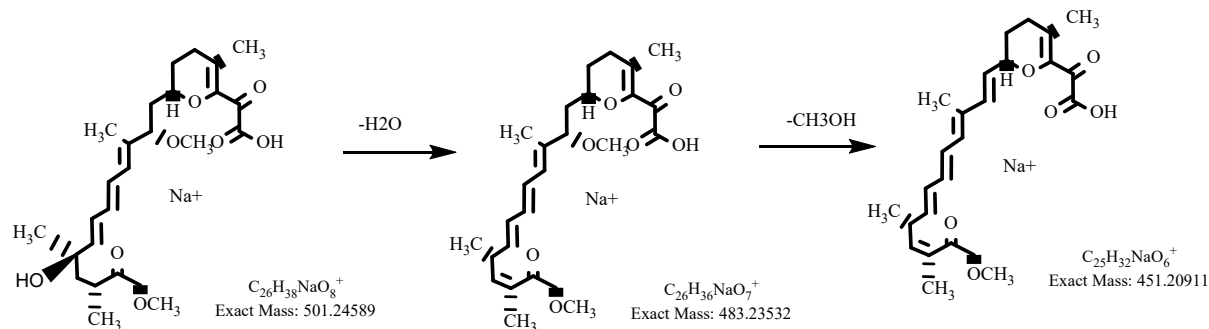

# Structural Confirmation of 39-O-Desmethyl, 24-Hydroxy Zotarolimus

| Zotarolimus Fragments    | 39-O-desmethyl, 23/24-hydroxy Zotarolimus Fragments | Comments                                   |                                                                                                                                              |
|--------------------------|-----------------------------------------------------|--------------------------------------------|----------------------------------------------------------------------------------------------------------------------------------------------|
|                          |                                                     |                                            |                                                                                                                                              |
| 320.11046                | 320.10999                                           | no hydroxylation, no desmethylation        | Rules out OH-pipecedine, 11, 12, and 14-OH                                                                                                   |
| 369.22610                | 355.21005                                           | desmethylation                             | Confirms 39-O-desmethyl                                                                                                                      |
| 381.24002                | 397.22045                                           | hydroxylation                              | 11, 12, 14, 23, 24,45, or 46-OH present                                                                                                      |
| 409.23493                | 425.22899                                           | hydroxylation                              | 11, 12, 14, 23, 24,45, or 46-OH present                                                                                                      |
| 427.2455                 | 443.23993                                           | hydroxylation                              | 11, 12, 14, 23, 24,45, or 46-OH present                                                                                                      |
| 459.27171                | 475.26577                                           | hydroxylation                              | 11, 12, 14, 23, 24, 45, or 45/46-OH present/ Rules out 16- and 27-O-desmethyl                                                                |
| 485.25097                | 501.24520                                           | hydroxylation                              | 11, 12, 14, 23, 24, 45, or 45/46-OH present/ Rules out 16- and 27-O-desmethyl                                                                |
| 582.30374                | 598.29811                                           | hydroxylation                              | 11, 12, 14, 23, 24, 45, or 45/46-OH present/ Rules out 27-O-desmethyl                                                                        |
| 614.32995                | 630.32469                                           | hydroxylation                              | 11, 12, 14, 23, 24, 45, or 45/46-OH present/ Rules out 16- and 27-O-desmethyl                                                                |
| 659.41429                | 661.39303                                           | hydroxylation                              | Rules out 11, 12, 14-OH, and OH-piperidine                                                                                                   |
| 755.47181                | 757.45044                                           | hydroxylation, desmethylation              | 11, 12, 14, 23, 24,45, or 45/46-OH present/ 16- 27-. or 39-O-desmethyl                                                                       |
| 988.56174                | 990.54036                                           | demethylation                              |                                                                                                                                              |
| Characteristic Fragments |                                                     | 327.19307/ 345.20363/ 401.19346/ 417.18837 | 451 due to methanol loss of 501 Rules out 16-O-desmethyl zotarolimus<br>425 due to methanol loss of 457 Rules out 16-O-desmethyl zotarolimus |
| Determinant patterns     |                                                     |                                            | Additional water loss for 23/24-OH                                                                                                           |

39-O-Desmethyl, 25-Hydroxy Zotarolimus, m/z = 990.54101

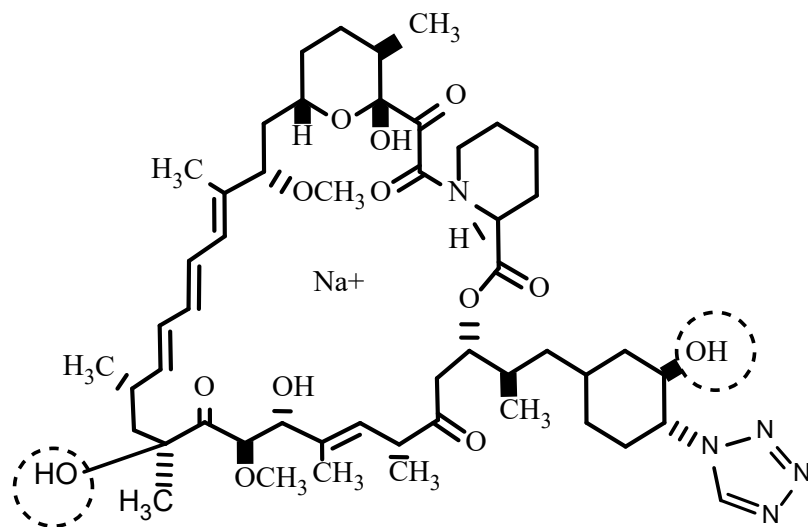

$C_{51}H_{77}N_5NaO_{13}^+$   
Exact Mass: 990.54101

39-O-desmethyl, 25-hydroxy zotarolimus

# 39-O-Desmethyl, 25-Hydroxy Zotarolimus Metabolites, m/z = 990.54101

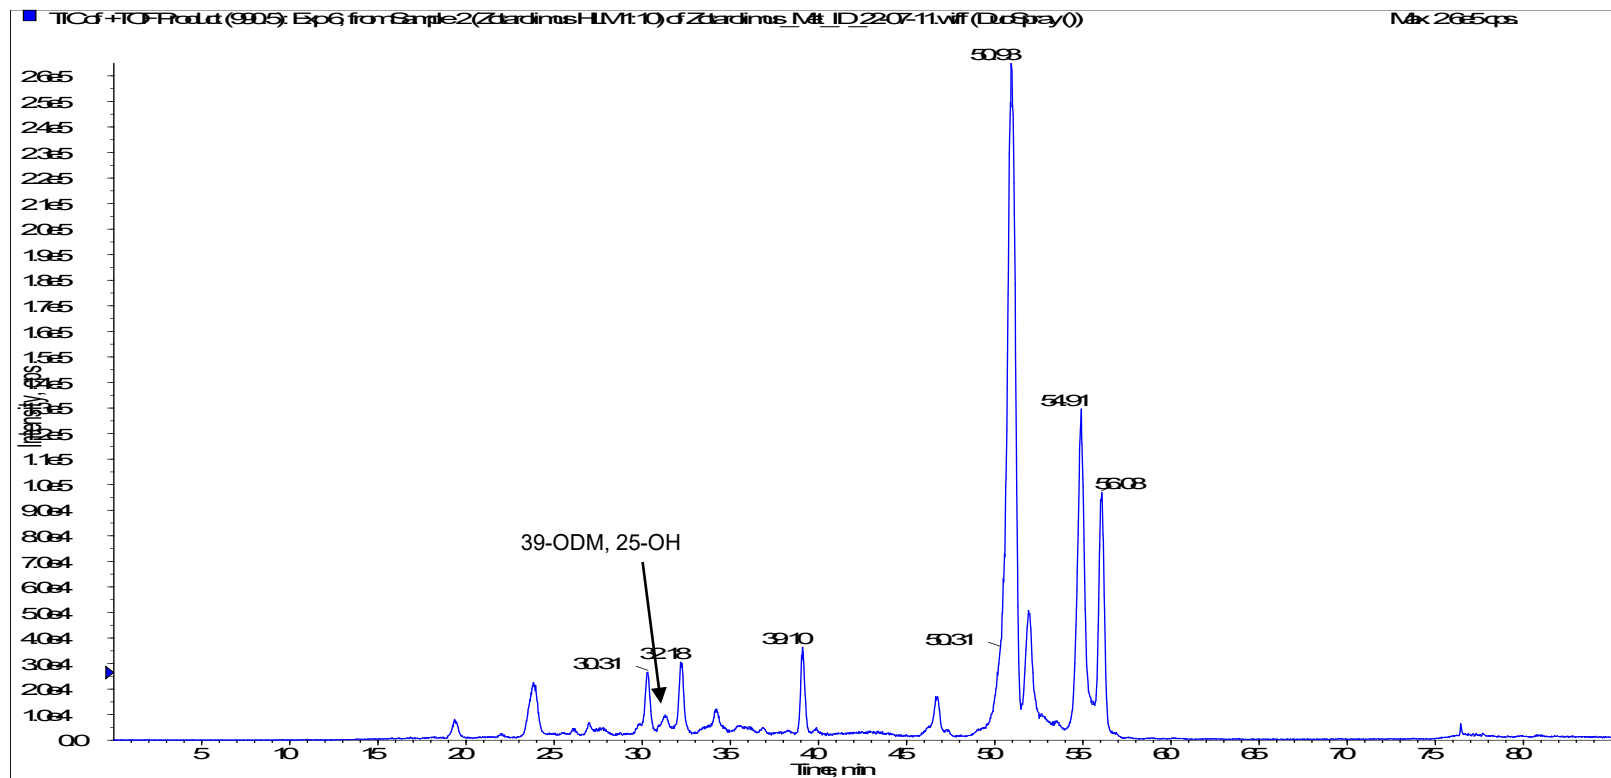

# 39-O-Desmethyl, 25-Hydroxy Zotarolimus m/z = 990.54101

## Extracted Ion Chromatogram (EIC)

+TOF Product (990.5): Exp 6, 23.4222 to 24.2806 min from Sample 2 (Zotarolimus HLM 1:10) of Zotarolimus\_Met\_ID\_22-07-11.wiff  
a=7.01841722012019970e-004, t0=-6.64116806344463840e+000 (DuoSpray (I))

Max. 241.3 cps

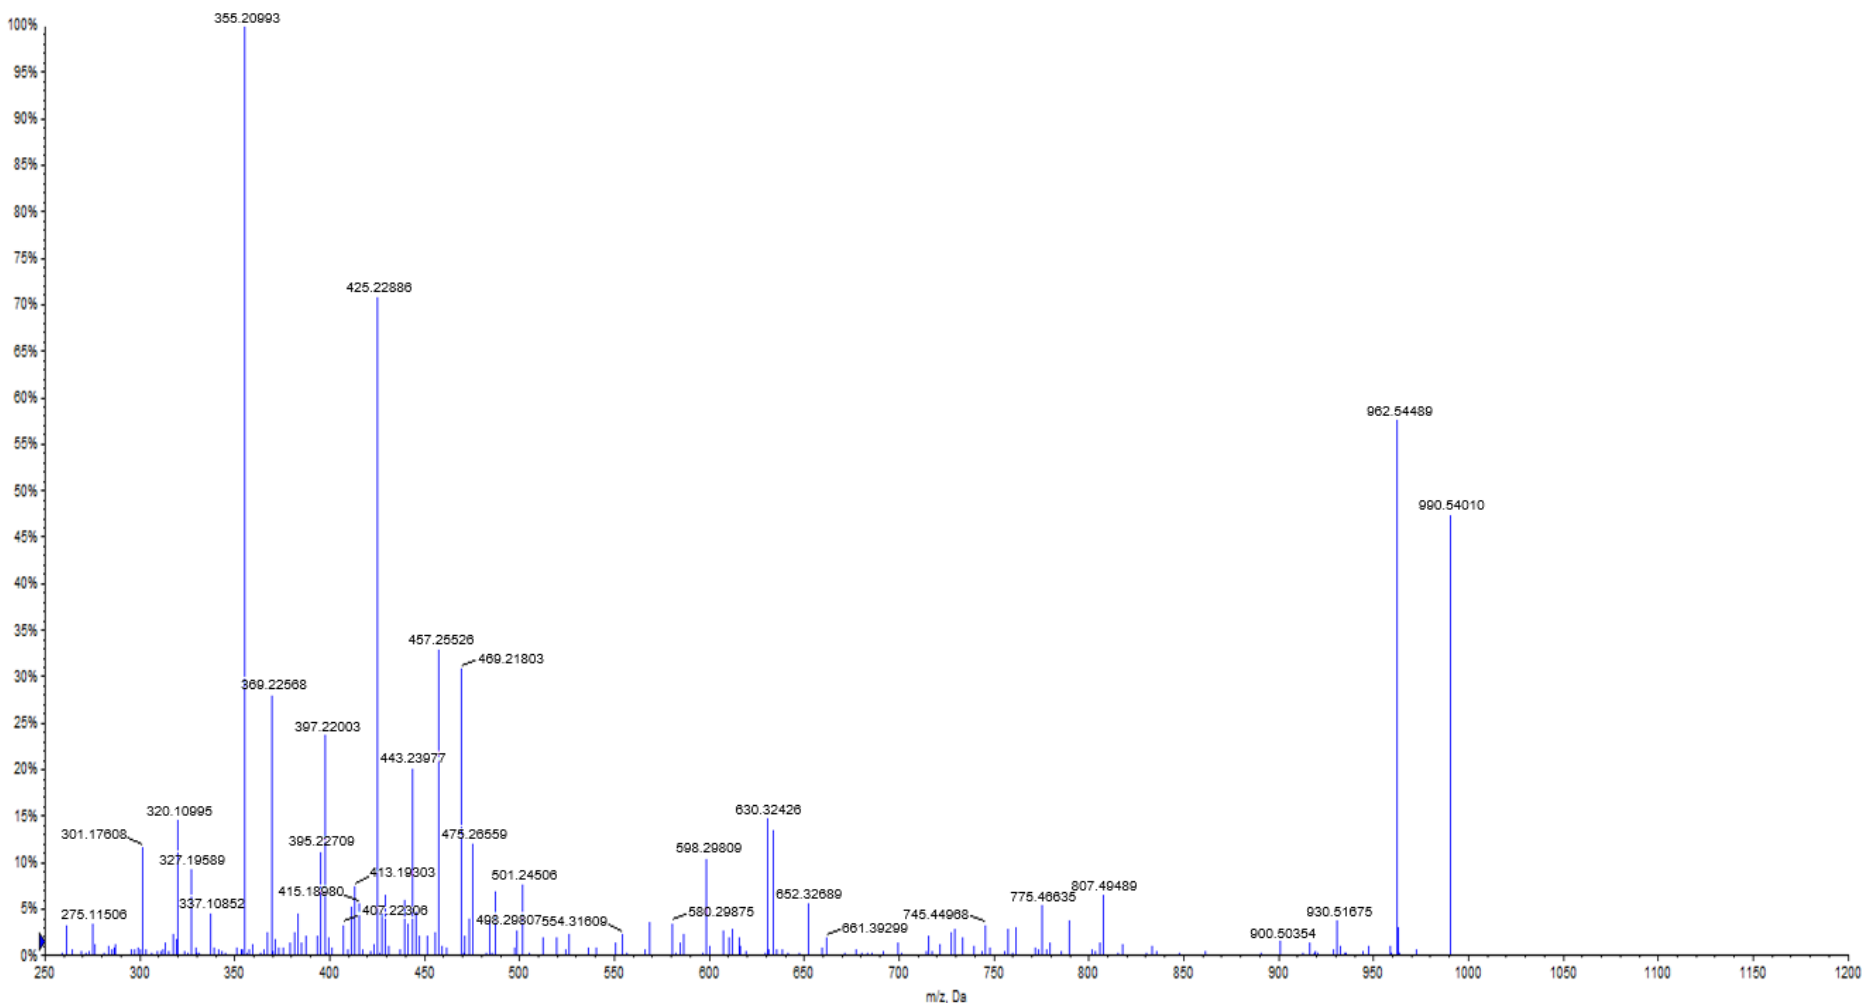

# 39-O-Desmethyl, 25-Hydroxy Zotarolimus Fragmentation Pattern

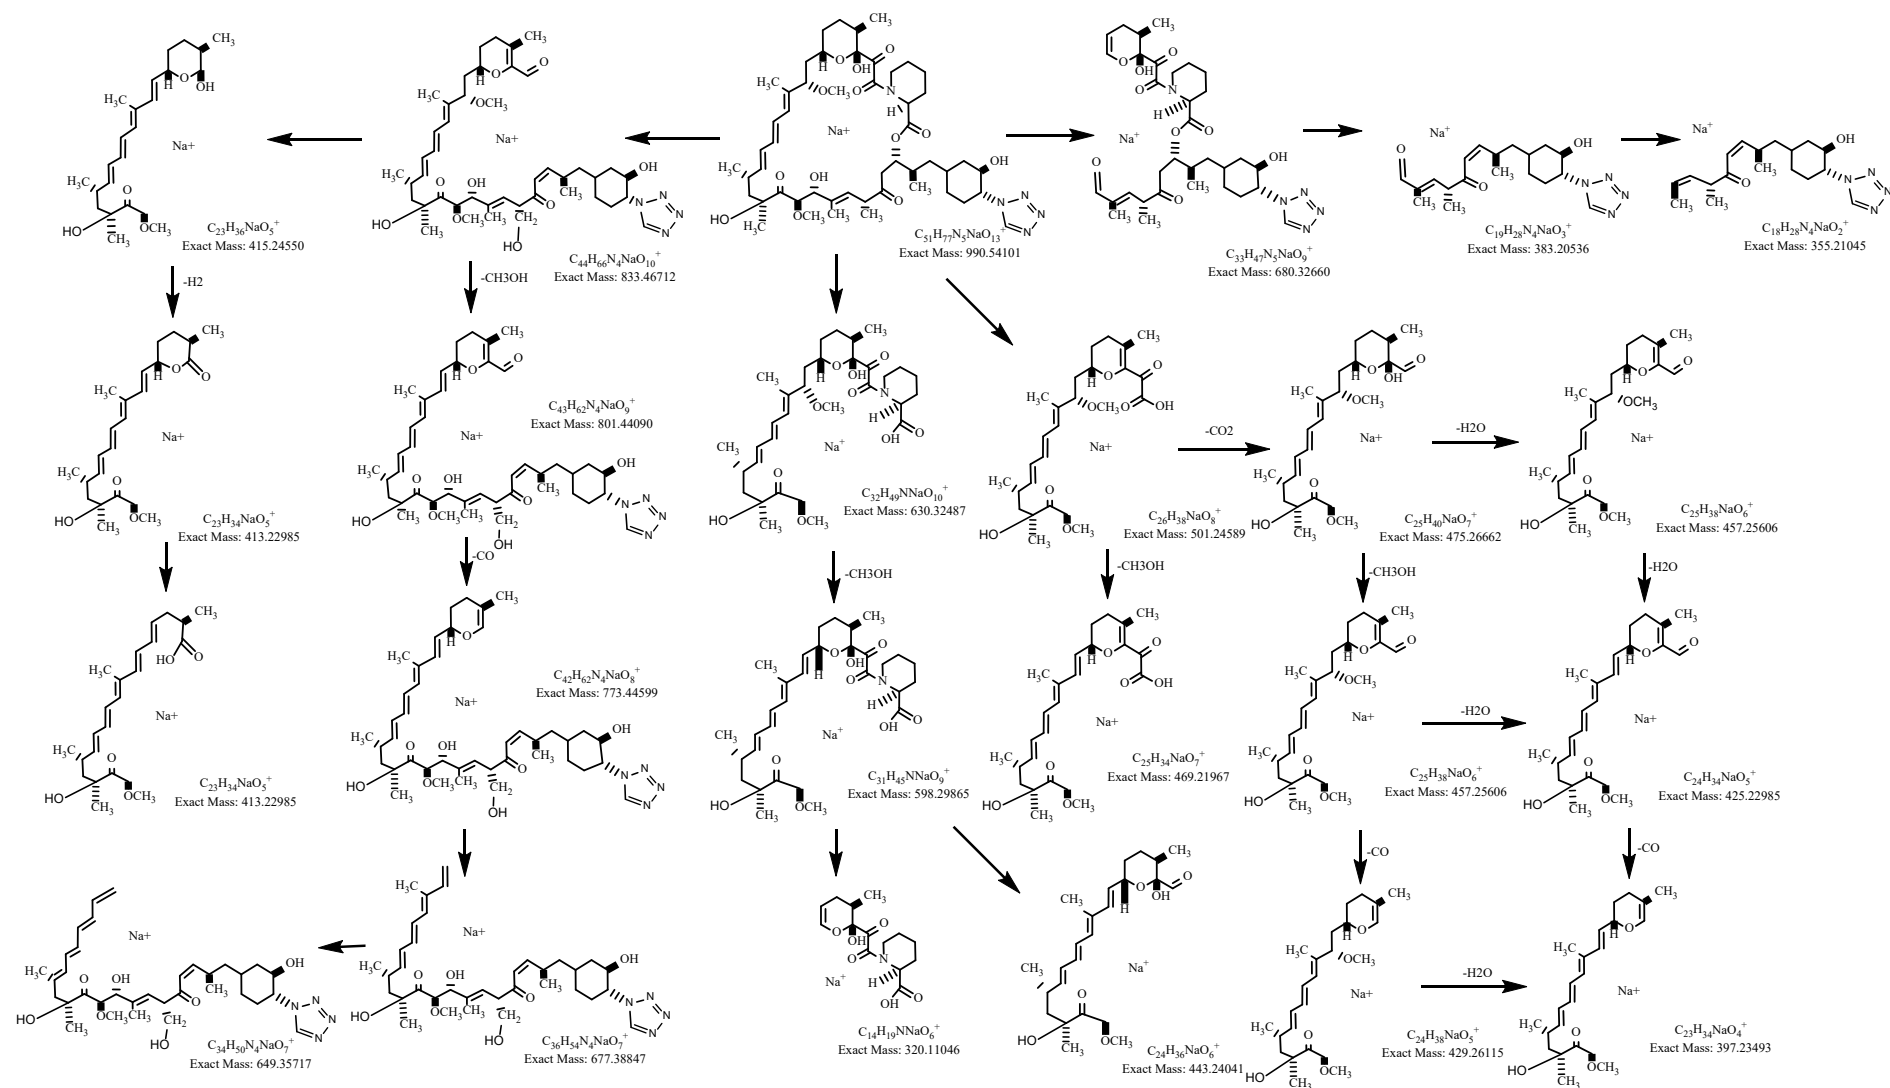

## $\Delta$ ppm of 39-O-Desmethyl, 25-Hydroxy Zotarolimus

---

| Fragment No. | Theoretical mass | Measured mass | $\Delta$ ppm |
|--------------|------------------|---------------|--------------|
| 1            | 320.11046        | 320.11003     | 1.3          |
| 2            | 355.21045        | 355.21022     | 0.6          |
| 3            | 369.22610        | 369.22568     | 1.1          |
| 4            | 383.20536        | 383.20489     | 1.2          |
| 5            | 425.22985        | 425.22933     | 1.2          |
| 6            | 443.24041        | 443.24006     | 0.8          |
| 7            | 457.25606        | 457.25584     | 0.5          |
| 8            | 469.21967        | 469.21919     | 1.0          |
| 9            | 475.26662        | 475.26630     | 0.7          |
| 10           | 501.24589        | 501.24554     | 0.7          |
| 11           | 598.29865        | 598.29833     | 0.5          |
| 12           | 630.32487        | 630.32444     | 0.7          |
| 13           | 661.39356        | 661.39288     | 1.0          |
| 14           | 757.45107        | 757.45044     | 0.8          |
| 15           | 990.54101        | 990.54027     | 0.7          |

# Characteristic Fragments of 39-O-desmethyl, 25-OH Zotarolimus (Water Loss)

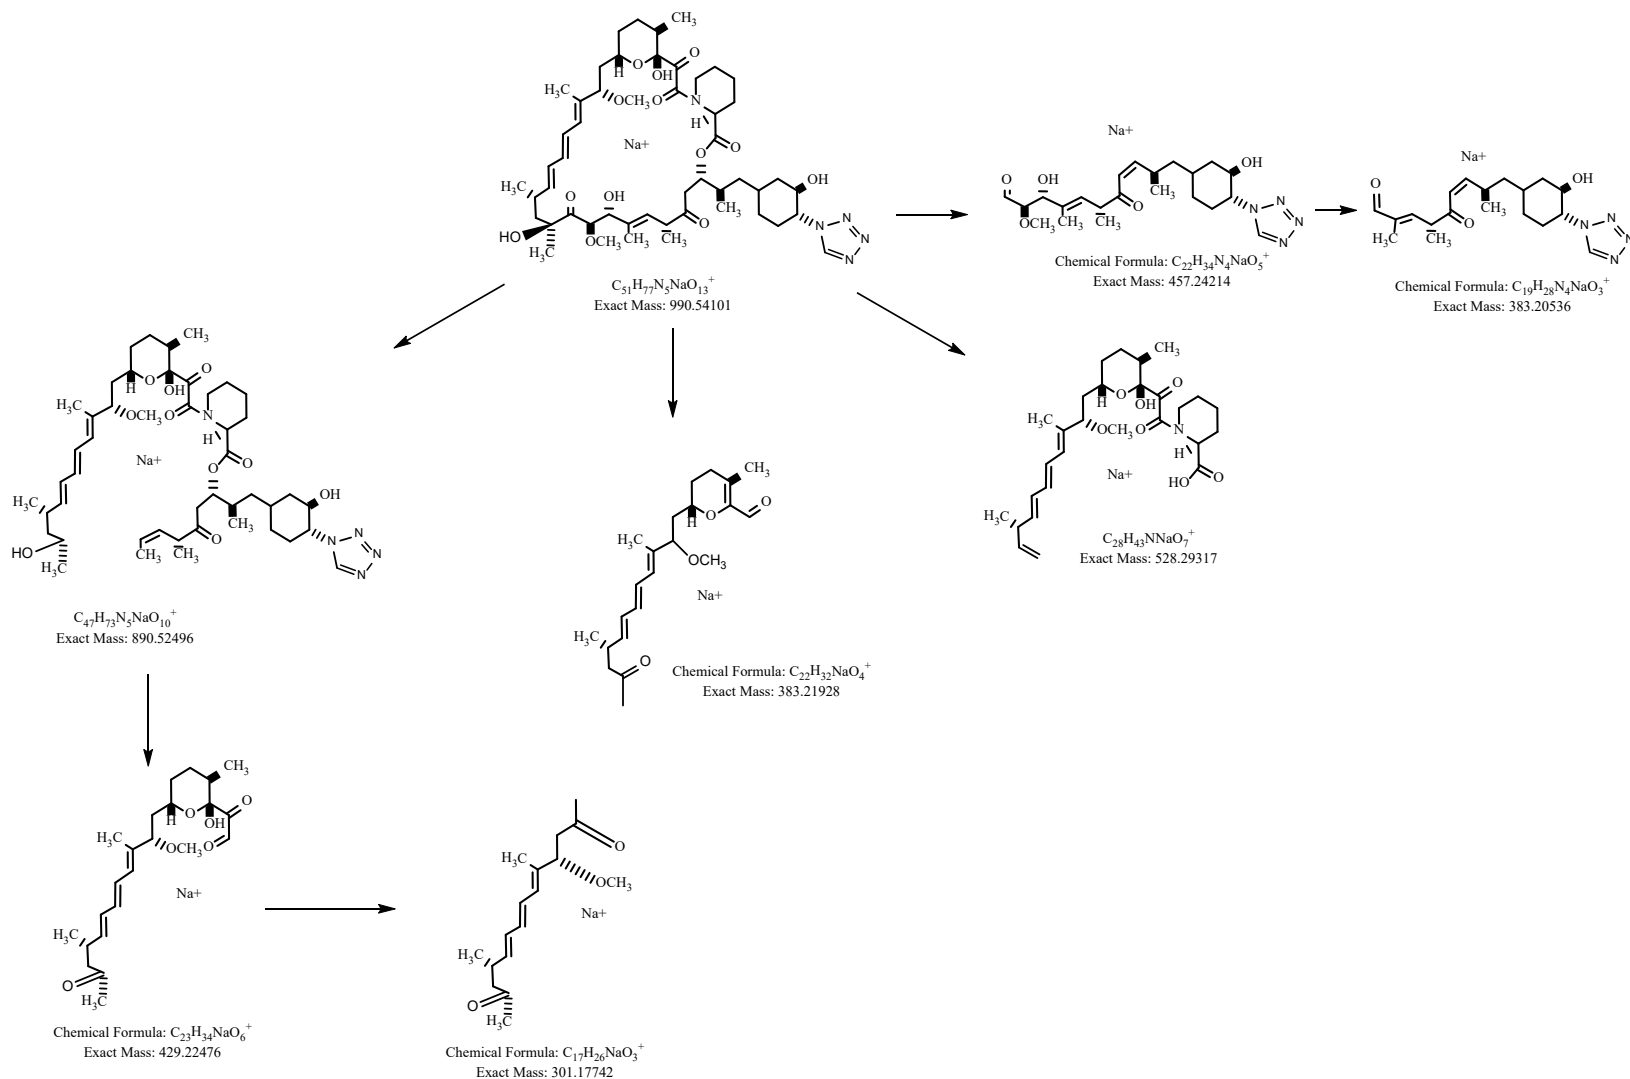



# Structural Confirmation of 39-O-Desmethyl, 25-Hydroxy Zotarolimus

| Zotarolimus Fragments    | 39-O-desmethyl, 25-hydroxy Zotarolimus Fragments | Comments                            |                                                                             |
|--------------------------|--------------------------------------------------|-------------------------------------|-----------------------------------------------------------------------------|
|                          |                                                  |                                     |                                                                             |
| 320.11046                | 320.11003                                        | no hydroxylation, no desmethylation | Rules out OH-pipredine, 11, 12, and 14-OH                                   |
| 369.22610                | 355.21022                                        | desmethylation                      | Confirms 39-O-desmethyl/ Rules out 47-, 48-, and 49-OH                      |
| NA                       | 383.21883                                        | NA                                  | Rules out 16-O-desmethyl                                                    |
| 409.23493                | 425.22933                                        | hydroxylation                       | 11, 12, 14, 23, 24, 45, or 46-OH present                                    |
| 427.2455                 | 443.24006                                        | hydroxylation                       | 11, 12, 14, 23, 24, 45, or 46-OH present/ Rules out 27-O-desmethyl          |
| 459.27171                | 475.26630                                        | hydroxylation                       | 11, 12, 14, 23, 24,45, or 45/46-OH present/ Rules out 16- or 27-O-desmethyl |
| 485.25097                | 501.24554                                        | hydroxylation                       | 11, 12, 14, 23, 24,45, or 45/46-OH present/ Rules out 16- or 27-O-desmethyl |
| 582.30374                | 598.29833                                        | hydroxylation                       | 11, 12, 14, 23, 24, 45, or 46-OH present/ 16- or 27-O-desmethyl             |
| 614.32995                | 630.32444                                        | hydroxylation                       | 11, 12, 14, 23, 24, 45, or 46-OH present/ 16- or 27-O-desmethyl             |
| 659.41429                | 661.39288                                        | hydroxylation                       | Rules out 11, 12, 14-OH, and OH-piperidine                                  |
| 755.47181                | 757.45044                                        | hydroxylation, desmethylation       | 11, 12, 14, 23, 24,45, or 45/46-OH present/ 16- 27-. or 39-O-desmethyl      |
| 988.56174                | 990.54027                                        | demethylation                       |                                                                             |
| Characteristic Fragments | 301.17742<br>383.21883<br>429.22476<br>528.29317 |                                     | Characteristic Fragments: 301, 383, 429, and 528                            |
| Determinant patterns     |                                                  |                                     | water loss instead of methanol loss                                         |

39-O-Desmethyl, 11-Hydroxy Zotarolimus, m/z = 990.54101

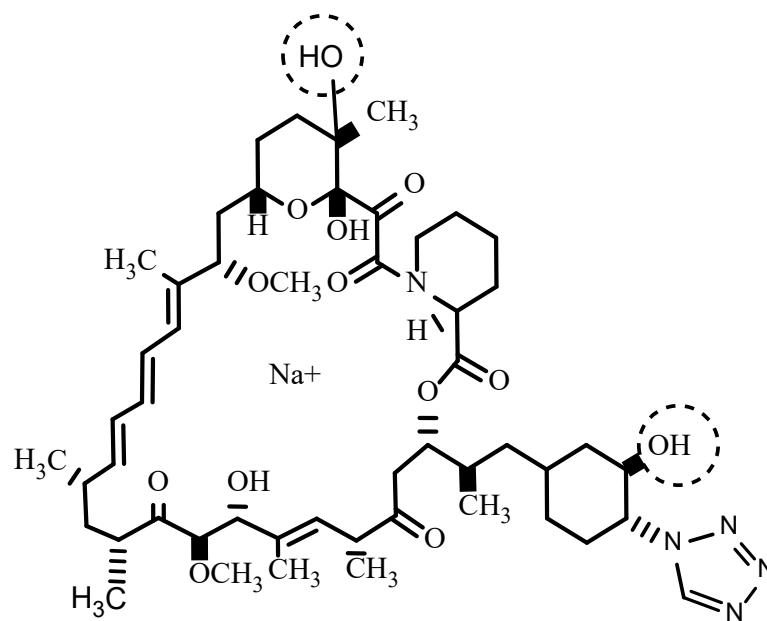

$C_{51}H_{77}N_5NaO_{13}^+$   
Exact Mass: 990.54101

# 39-O-Desmethyl, 11-Hydroxy Zotarolimus Metabolites, $m/z = 990.54101$

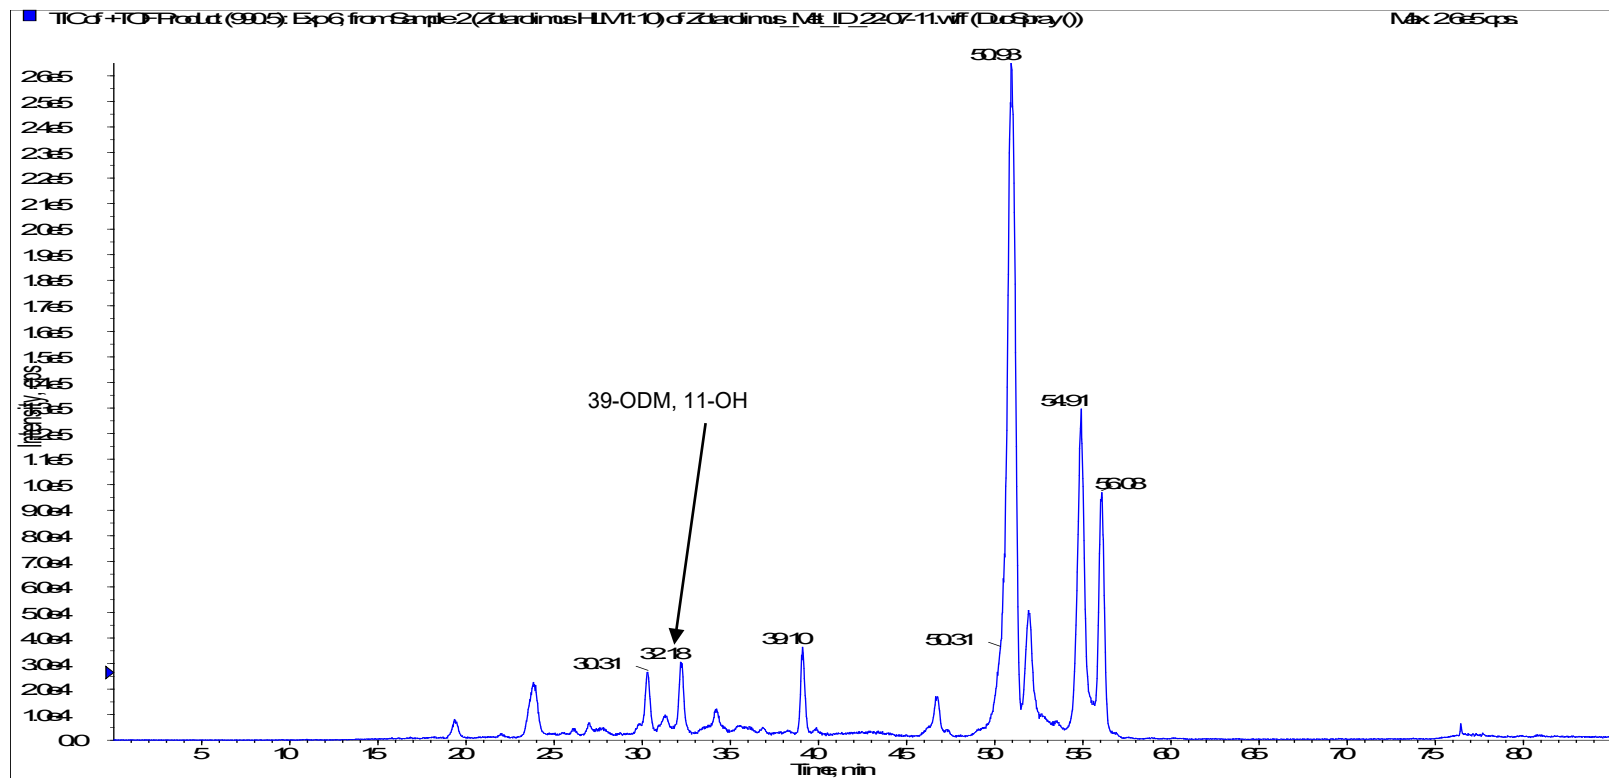

# 39-O-Desmethyl, 11-Hydroxy Zotarolimus Extracted Ion Chromatogram (EIC)

+TOF Product (990.5); Exp 6; 23.4222 to 24.2806 min from Sample 2 (Zotarolimus HLM 1:10) of Zotarolimus\_Met\_ID\_22-07-11.wiff  
a=7.01841722012019970e-004, b=-6.64116806344463840e+000 (DuoSpray (I))

Max. 241.3 cps

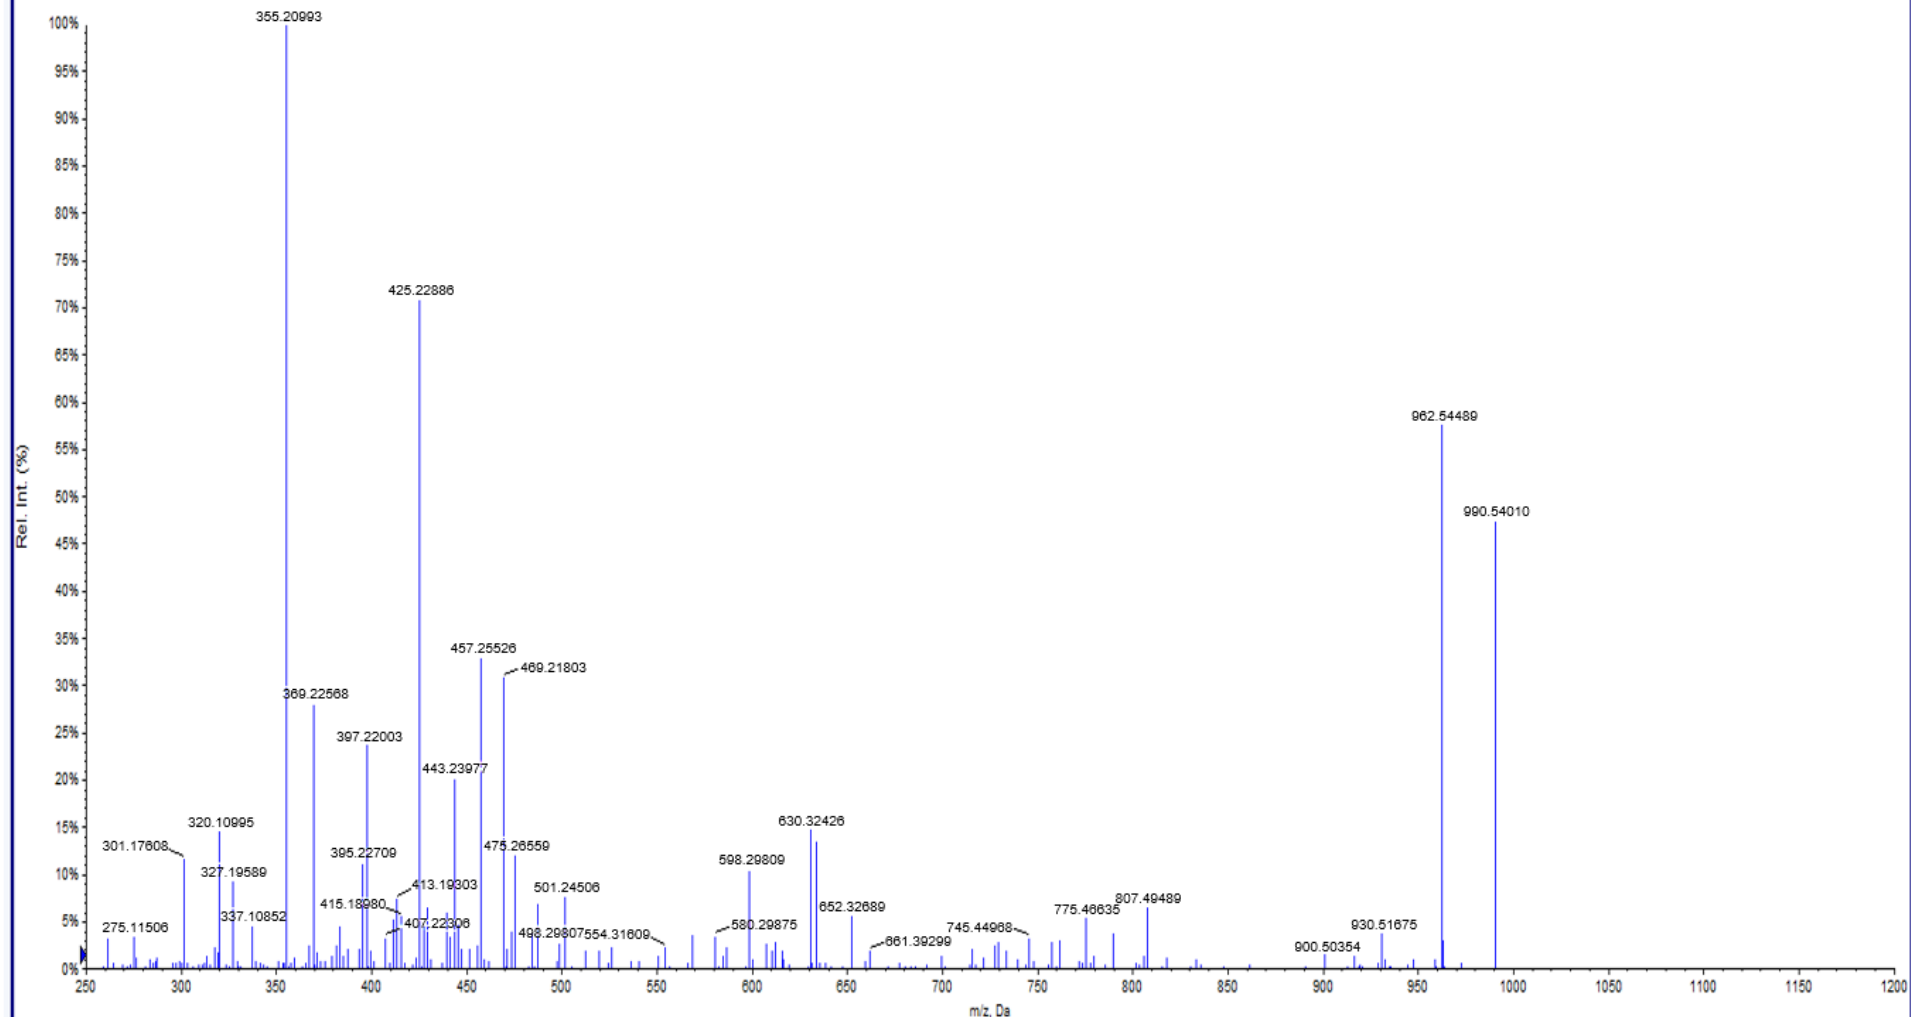

## $\Delta$ ppm of 39-O-Desmethyl, 11-Hydroxy Zotarolimus

---

| Fragment No. | Theoretical mass | Measured mass | $\Delta$ ppm |
|--------------|------------------|---------------|--------------|
| 1            | 336.10537        | 336.10479     | 1.7          |
| 2            | 355.21045        | 355.20958     | 2.4          |
| 3            | 369.24002        | 369.2393      | 1.9          |
| 4            | 383.20536        | 383.20488     | 1.3          |
| 5            | 401.26623        | 401.26583     | 1.0          |
| 6            | 425.22985        | 425.22901     | 2.0          |
| 7            | 443.24041        | 443.2399      | 1.2          |
| 8            | 469.21967        | 469.21905     | 1.3          |
| 9            | 501.24589        | 501.24539     | 1.0          |
| 10           | 733.45107        | 733.45009     | 1.3          |
| 11           | 761.44599        | 761.44409     | 2.5          |
| 12           | 789.47729        | 789.47650     | 1.0          |
| 13           | 807.48785        | 807.48665     | 1.5          |
| 14           | 990.54101        | 990.54001     | 1.0          |

## 39-O-Desmethyl, 11-Hydroxy Zotarolimus Fragmentation Pattern

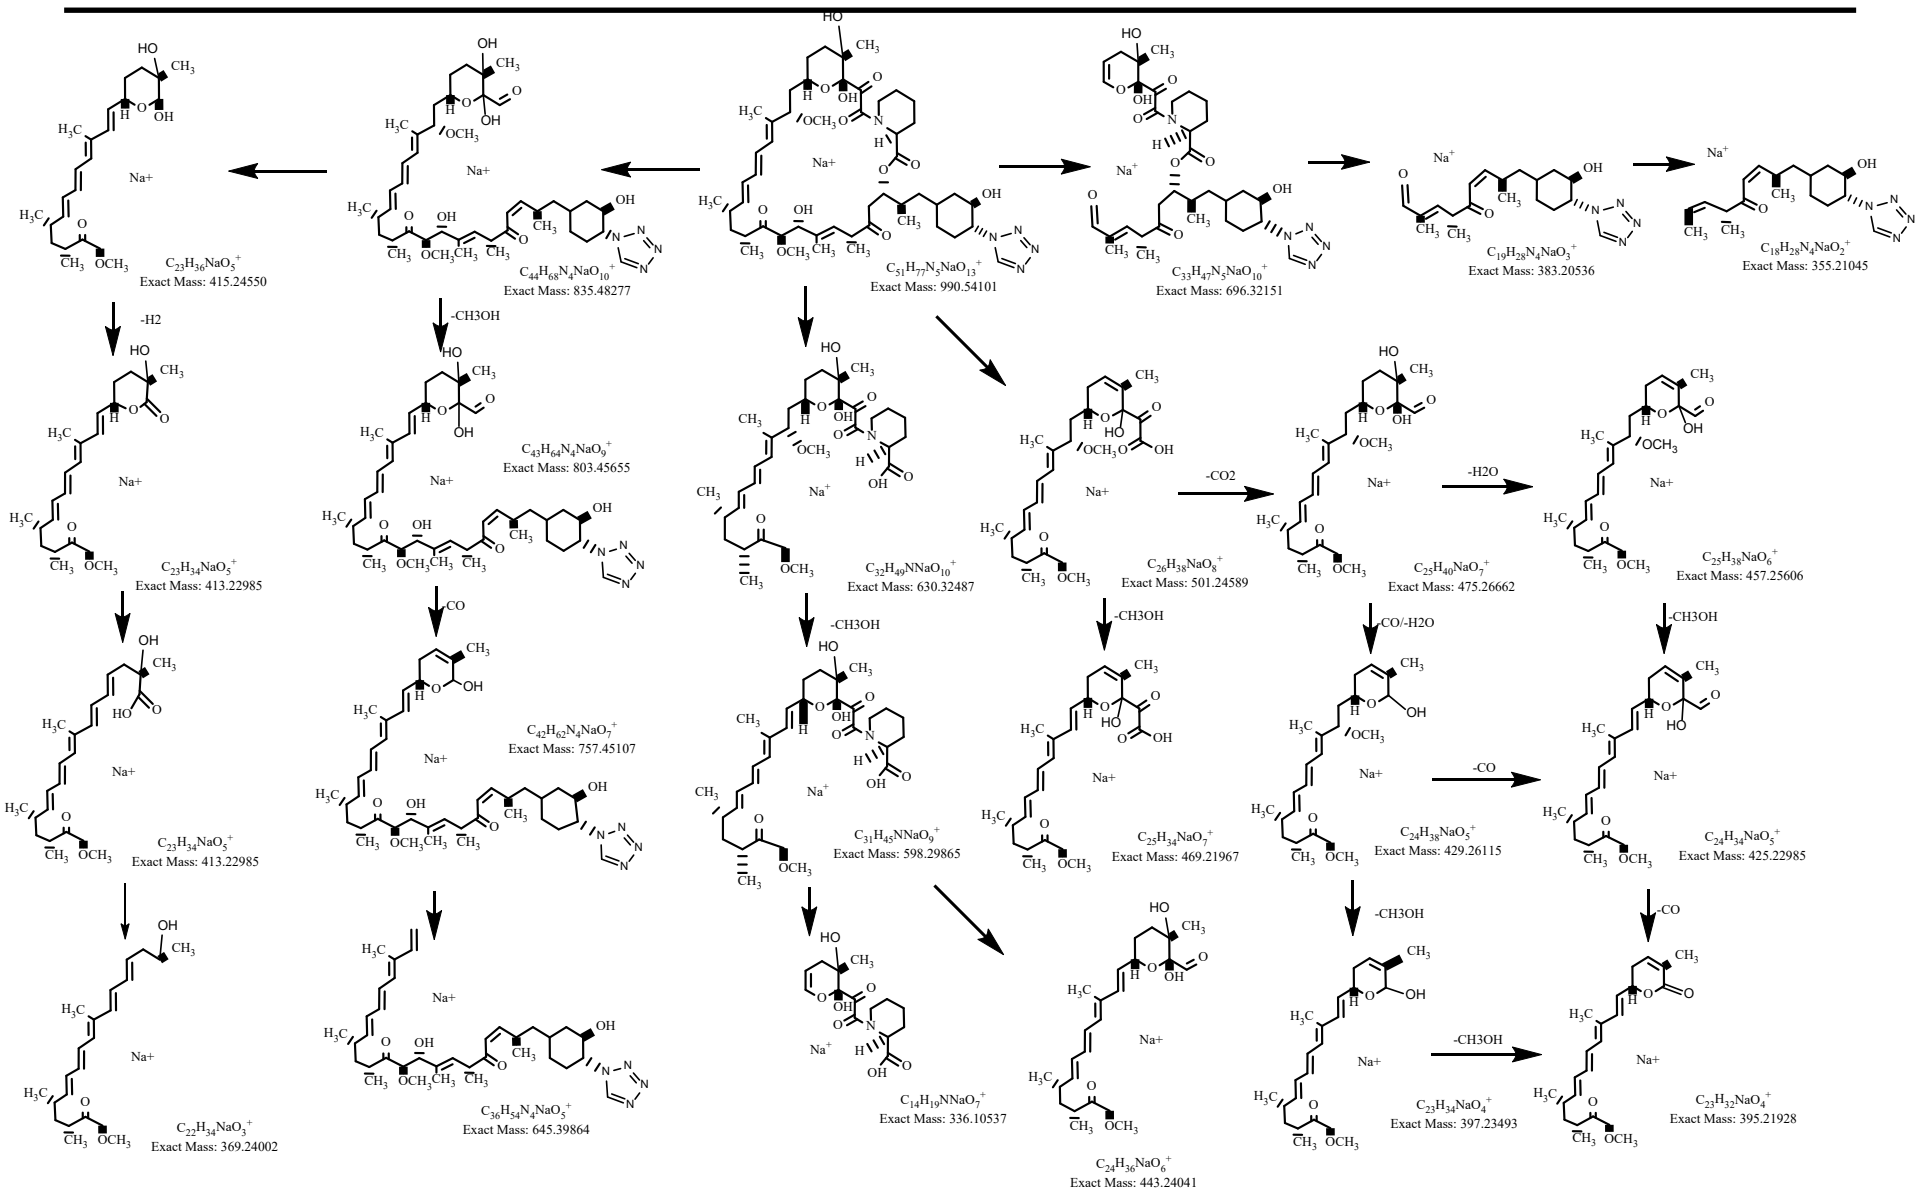

# 39-O-Desmethyl, 11-Hydroxy Zotarolimus Characteristic Fragmentation Pattern

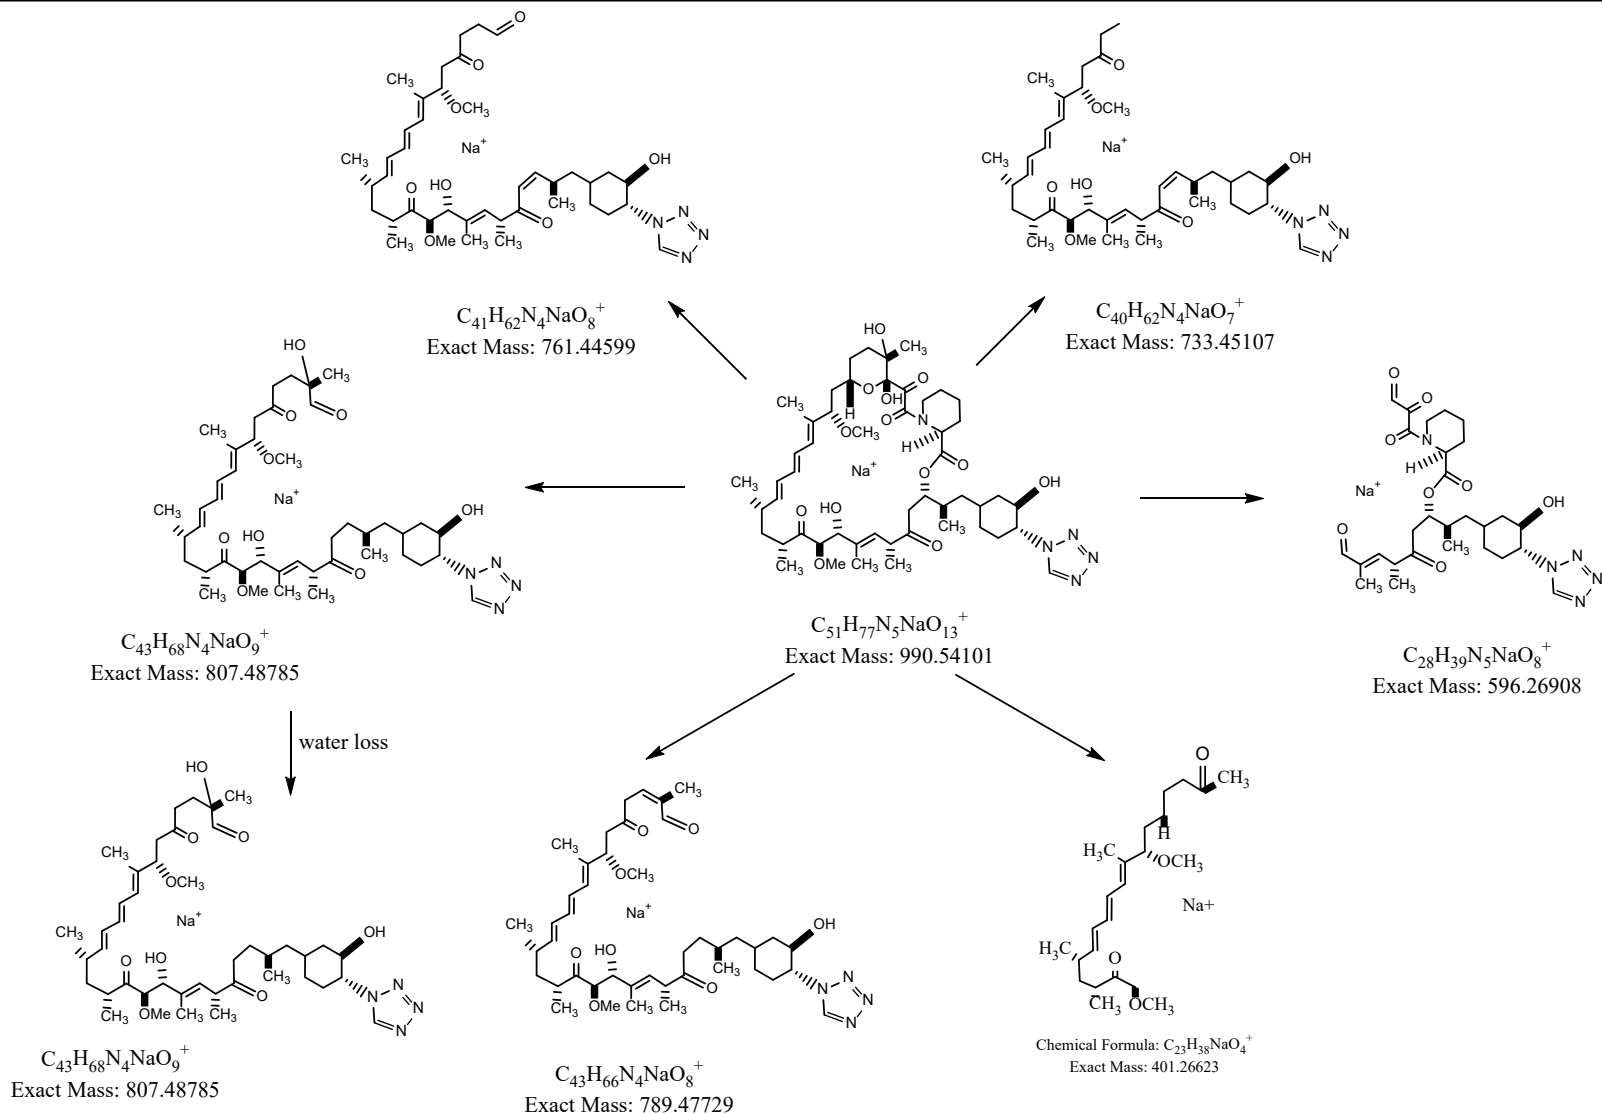

# Structural Confirmation of 39-O-Desmethyl, 11-Hydroxy Zotarolimus

| Zotarolimus<br>Fragments | 39-O-<br>desmethyl, 11-<br>hydroxy-<br>Zotarolimus<br>Fragments |                               |                                                                               |
|--------------------------|-----------------------------------------------------------------|-------------------------------|-------------------------------------------------------------------------------|
|                          |                                                                 | Comments                      |                                                                               |
| 320.11046                | 336.10479                                                       | hydroxylation                 | 11, 12, 14, or piperidine-OH present                                          |
| NA                       | 369.2393                                                        | Specific fragment             | confirms 11-OH                                                                |
| 397.22101                | 383.20488                                                       | desmethylation                | confirms 39-O-desmethyl/ Rules out 47, 48, and 49-OH                          |
| 409.23493                | 425.22901                                                       | hydroxylation                 | 11, 12, 14, 23, 24, 25, 45, or 46-OH present/ 16- or 27-O-desmethyl present   |
| 427.2455                 | 443.2399                                                        | hydroxylation                 | 11, 12, 14, 23, 24, 25, 45, or 46-OH present/ 16- or 27-O-desmethyl present   |
| 453.22476                | 469.21905                                                       | hydroxylation                 | 11, 12, 14, 23, 24, 25, 45, or 46-OH present/ 16- or 27-O-desmethyl present   |
| 485.25097                | 501.24539                                                       | hydroxylation                 | 11, 12, 14, 23, 24, 25, 45, or 46-OH present/ Rules out 16- or 27-O-desmethyl |
| 614.32995                | 630.32444                                                       | hydroxylation                 | 11, 12, 14, 23, 24, 25, 45, or 46-OH present/ Rules out 16- or 27-O-desmethyl |
| 659.41429                | 645.39787                                                       | desmethylation                | Rules out 23, 24, 25, 45, 46, 47, 487, 49-OH/ 27- or 39-ODM present           |
| 988.56174                | 990.54001                                                       | hydroxylation, desmethylation |                                                                               |
| Characteristic Fragments |                                                                 |                               | 369/ 383/ 401/ 596/ 733/ 761/ 789                                             |
| Determinant patterns     |                                                                 |                               |                                                                               |



16-O-Desmethyl, Hydroxy-Piperidine Zotarolimus (I), m/z = 990.54101

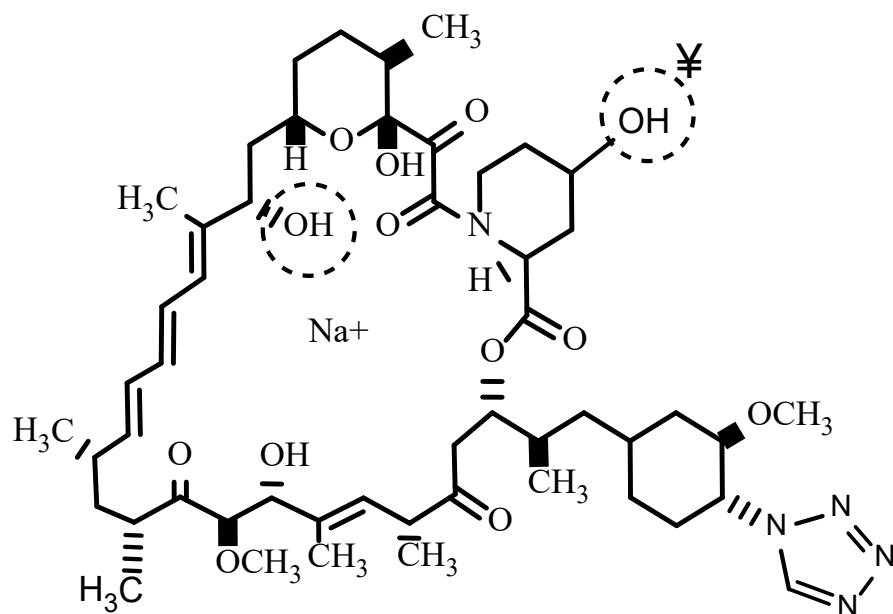

$C_{51}H_{77}N_5NaO_{13}^+$   
Exact Mass: 990.54101

# 16-O-Desmethyl, Hydroxy-Piperidine Zotarolimus (I) Metabolites, $m/z = 990.54101$

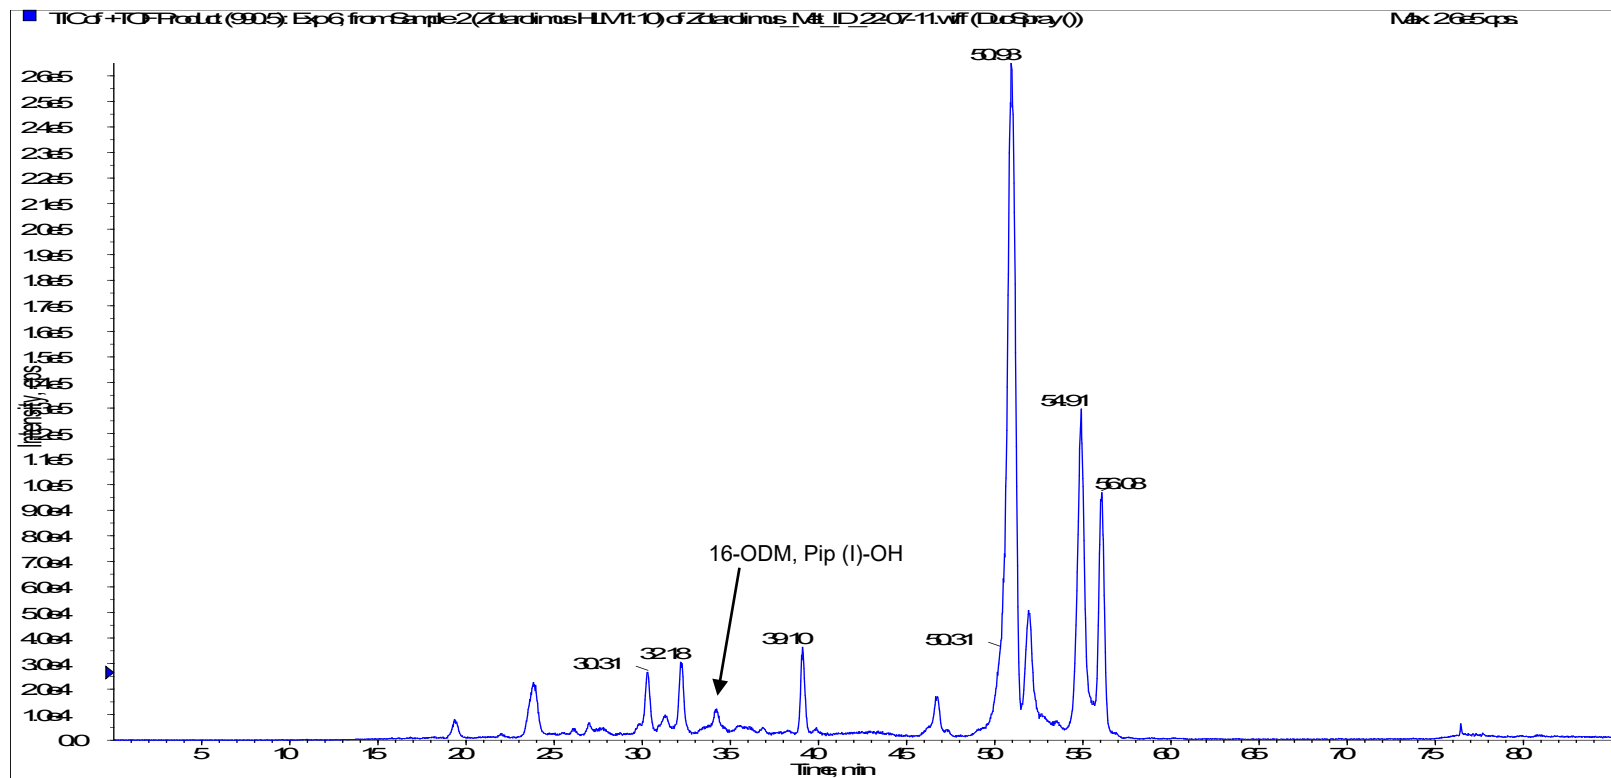

# 16-O-Desmethyl, Hydroxy-Piperidine Zotarolimus (I)

## Extracted Ion Chromatogram (EIC)

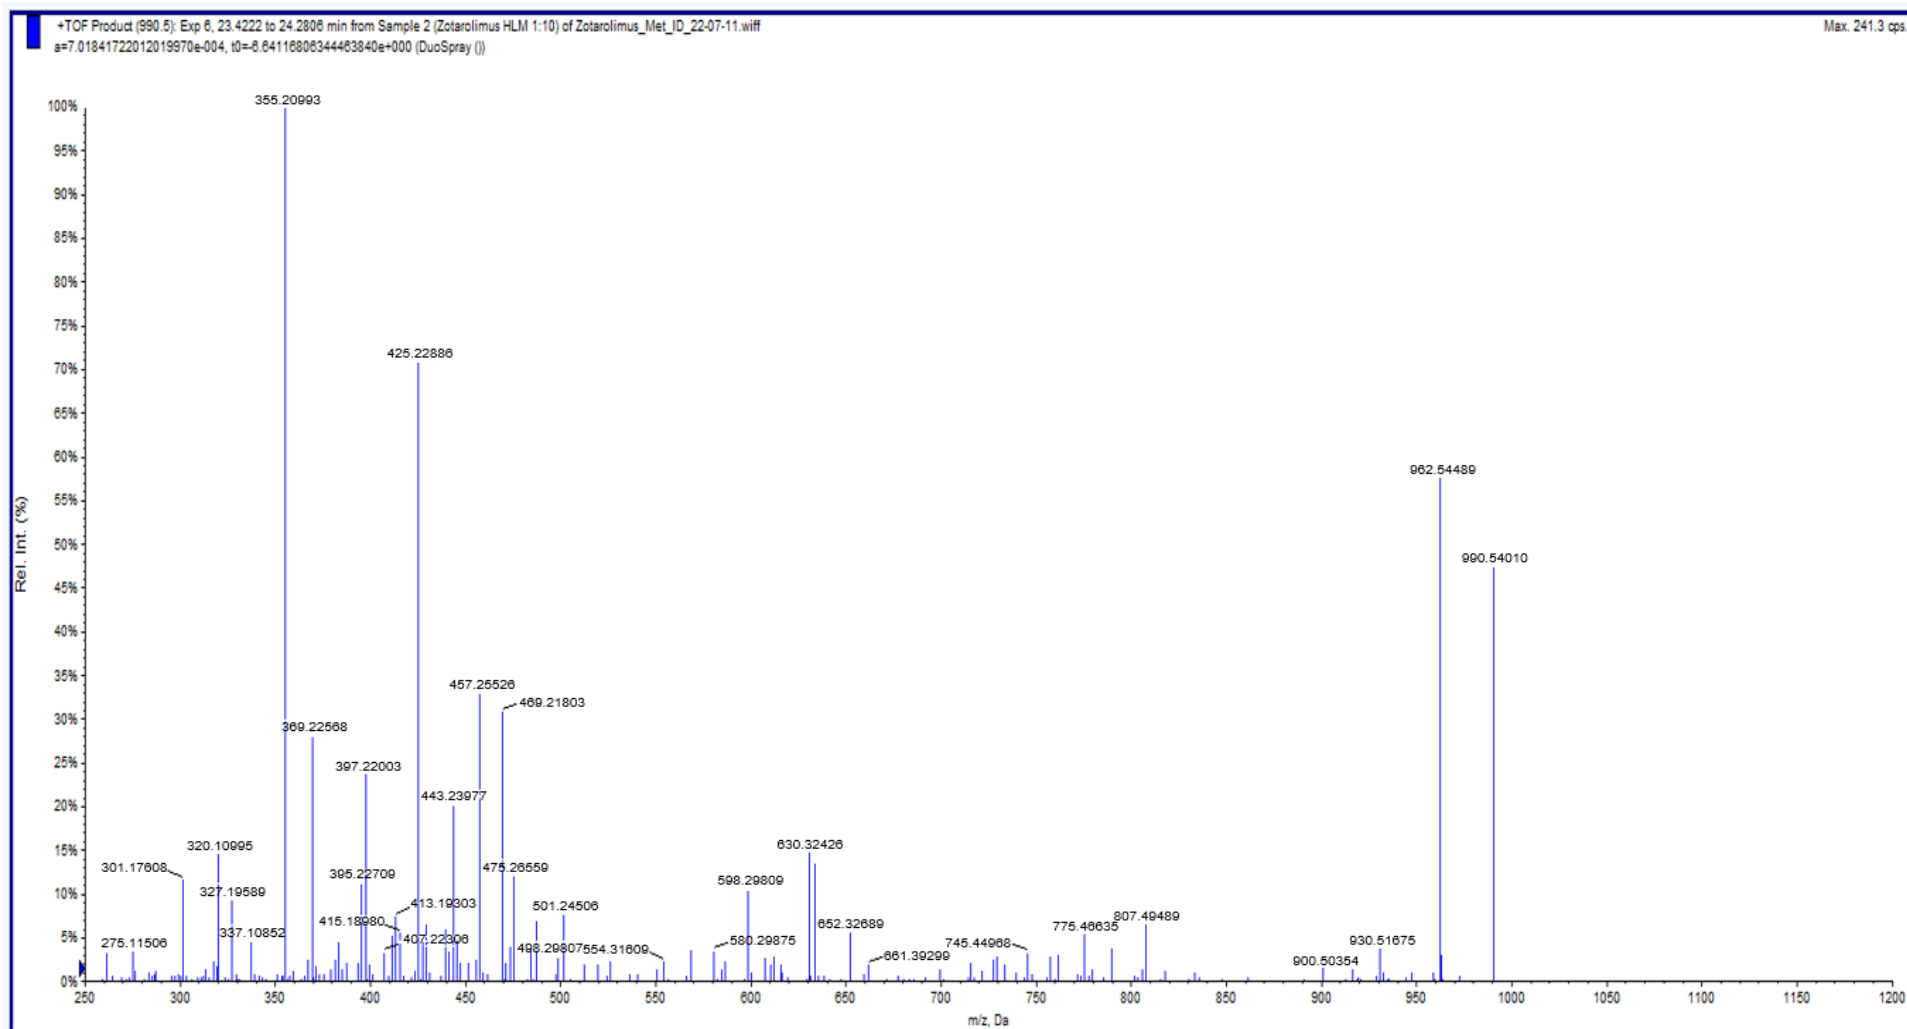

# 16-O-Desmethyl, Hydroxy-Piperidine Zotarolimus (I) Fragmentation Pattern

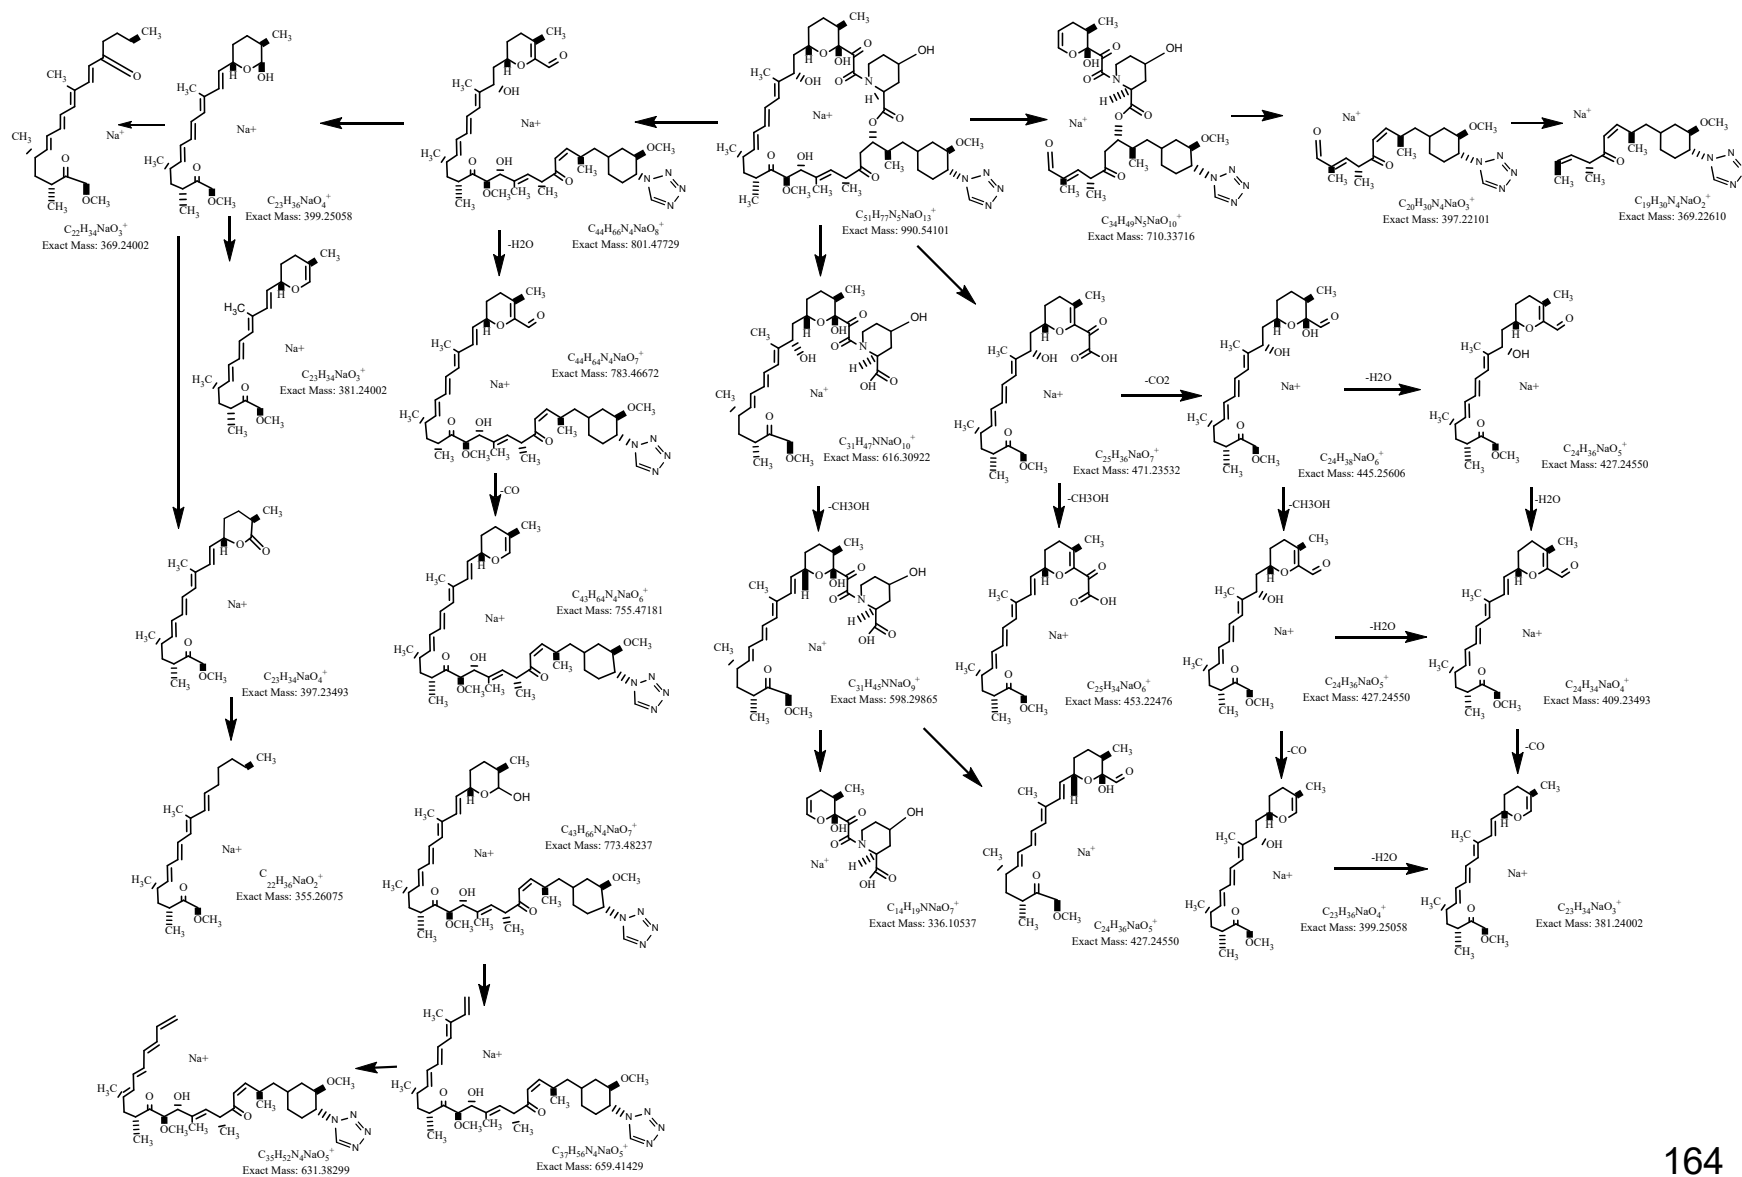

## $\Delta$ ppm of 16-O-Desmethyl, Hydroxy-piperidine Zotarolimus (I)

---

| Theoretical mass | Measured mass | $\Delta$ ppm |
|------------------|---------------|--------------|
| 336.10537        | 336.10439     | 2.9          |
| 355.26075        | 355.25973     | 2.9          |
| 381.24002        | 381.23887     | 3.0          |
| 397.23493        | 397.23448     | 1.1          |
| 409.23493        | 409.23415     | 1.9          |
| 427.24550        | 427.24506     | 1.0          |
| 453.22476        | 453.22423     | 1.2          |
| 471.23532        | 471.23403     | 2.7          |
| 598.29865        | 598.29813     | 0.9          |
| 616.30922        | 616.30817     | 1.7          |
| 631.38299        | 631.38206     | 1.5          |
| 990.54101        | 990.54006     | 1.0          |

# Structural Confirmation of 16-O-Desmethyl, Hydroxy-Piperidine Zotarolimus (I)

| Zotarolimus Fragments    | 16-O-desmethyl, hydroxy-piperidine Zotarolimus Fragments |                                     |                                                                               |
|--------------------------|----------------------------------------------------------|-------------------------------------|-------------------------------------------------------------------------------|
|                          |                                                          | Comments                            |                                                                               |
| 320.11046                | 336.10439                                                | hydroxylation                       | 11, 12, 14, or piperidine-OH present                                          |
| 381.24002                | 381.23887                                                | no hydroxylation, no desmethylation | 11, 12, 14, 23, 24, 25, 45, or 46-OH present/ confirms 16-O-desmethyl         |
| 397.23493                | 397.23448                                                | no hydroxylation, no desmethylation | Rules out 47, 48, and 49-OH/ Rules out 39-O-desmethyl                         |
| 409.23493                | 409.23415                                                | no hydroxylation, no desmethylation | 11, 12, 14, 23, 24, 25, 45, or 46-OH present/ confirms 16-O-desmethyl         |
| 441.26115                | 427.24506                                                | demethylation                       | 11, 12, 14, 23, 24, 25, 45, or 46-OH present/ 16- or 27-O-desmethyl present   |
| 453.22476                | 453.22423                                                | no hydroxylation, no desmethylation | 11, 12, 14, 23, 24,45, or 46-OH present/ confirms 16-O-desmethyl              |
| 485.25097                | 471.23403                                                | hydroxylation                       | 11, 12, 14, 23, 24, 25, 45, or 46-OH present/ 16- or 27-O-desmethyl present   |
| 582.30374                | 598.29813                                                | hydroxylation                       | 11, 12, 14, 23, 24, 45, 46, or Piperidine-OH present/ confirms 16-O-desmethyl |
| 614.32995                | 616.30817                                                | hydroxylation, desmethylation       | 11, 12, 14, 23, 24,45, 46, or Piperidine-OH present/16- or 27-O-desmethyl     |
| 659.41429                | ND                                                       | hydroxylation                       |                                                                               |
| 631.38299                | 631.38206                                                | no hydroxylation, no desmethylation | 23, 24, 25, 45, 46, 47, 48 , or 49-OH present/ Rules out 39-O-desmethyl       |
| 988.56174                | 990.54027                                                | demethylation                       |                                                                               |
| Characteristic Fragments |                                                          |                                     | 336                                                                           |
| Determinant patterns     |                                                          |                                     | water loss instead of methanol loss at position C16                           |

27-O-Desmethyl, 45/46-Hydroxy Zotarolimus (I), m/z = 990.54101

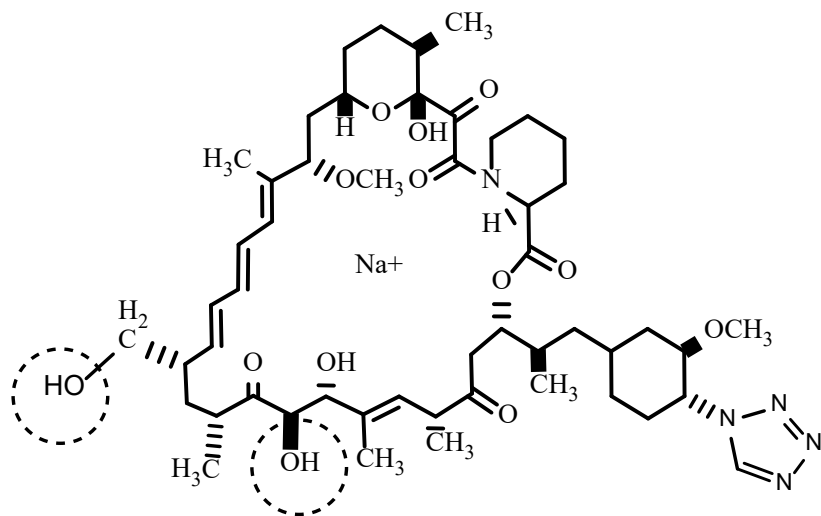

$C_{51}H_{77}N_5NaO_{13}^+$   
Exact Mass: 990.54101

27-O-desmethyl, 45-hydroxy sirolimus

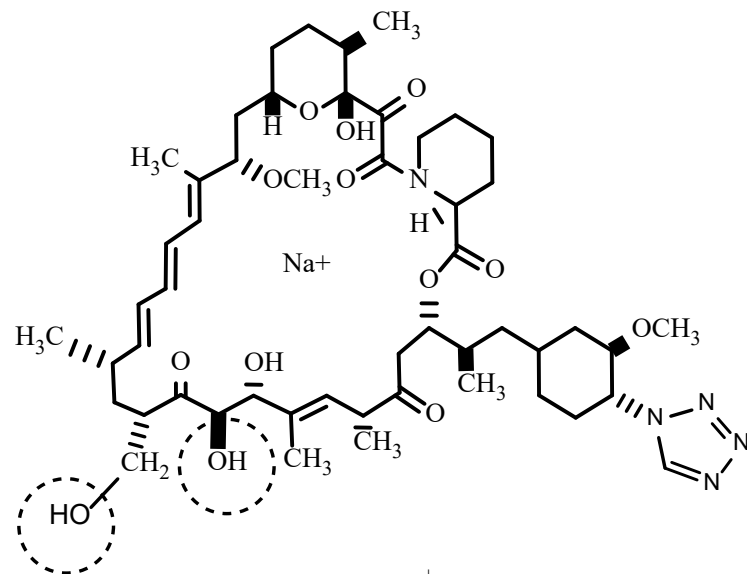

$C_{51}H_{75}N_5NaO_{13}^+$   
Exact Mass: 988.52536

27-O-desmethyl, 46-hydroxy sirolimus

# 27-O-Desmethyl, 45/46-Hydroxy Zotarolimus Metabolites, $m/z = 990.54101$

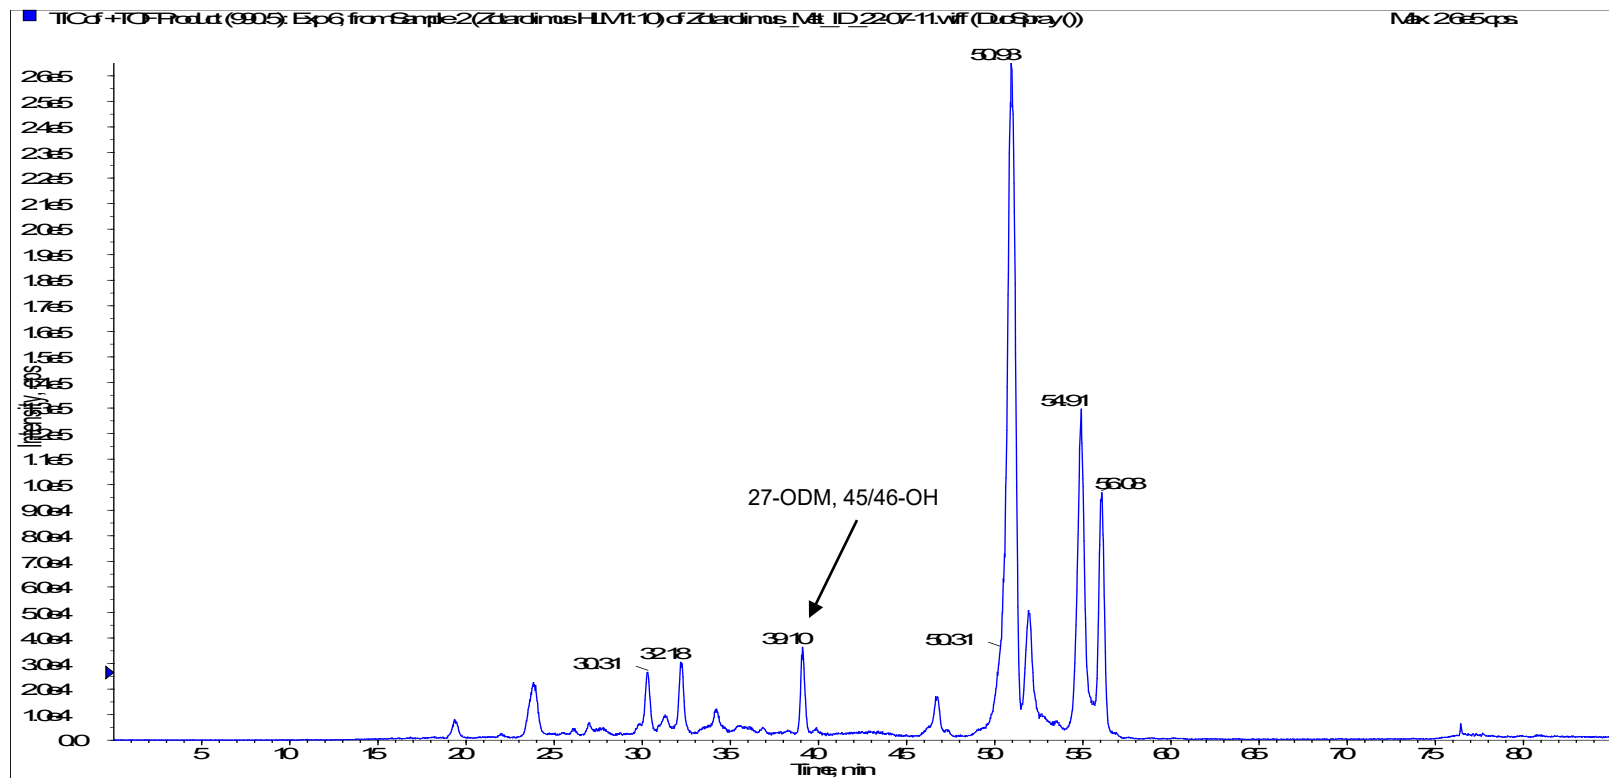



# 27-O-Desmethyl, 45/46-Hydroxy Zotarolimus Extracted Ion Chromatogram (EIC)

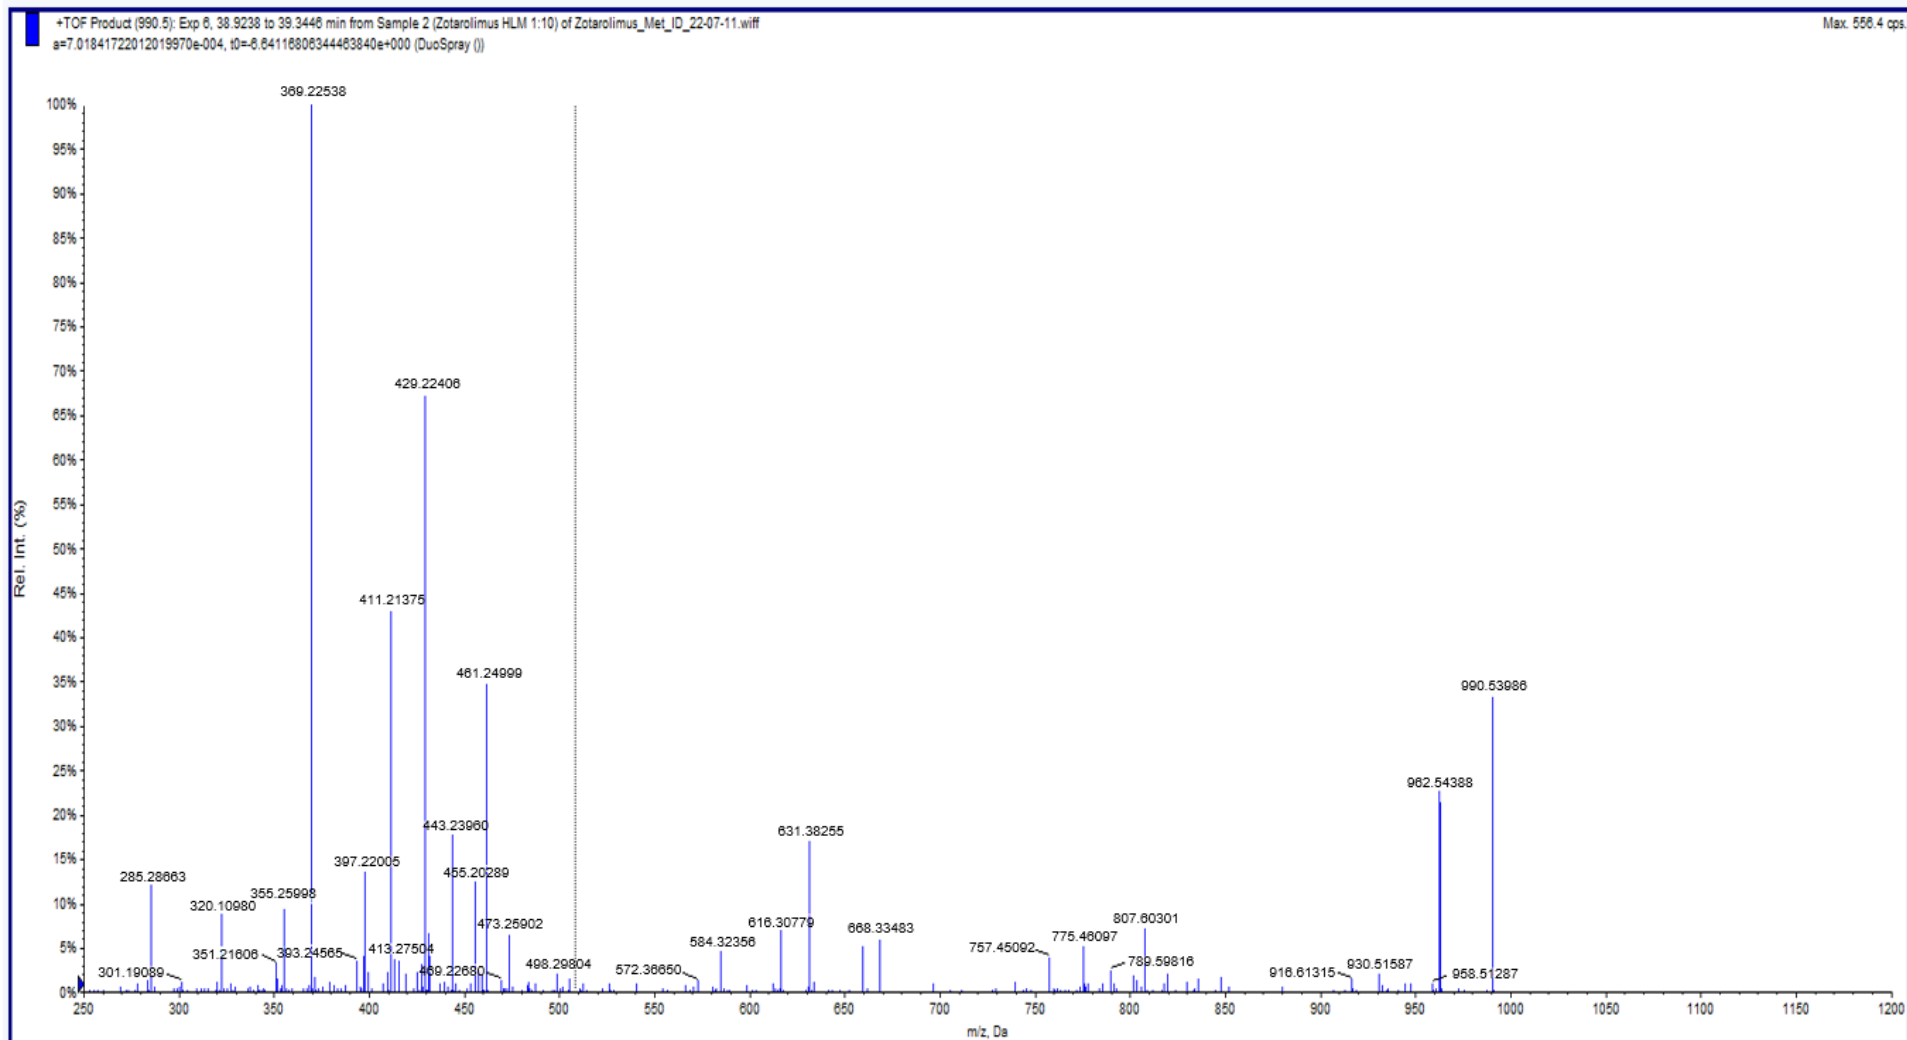

## $\Delta$ ppm of 16-O-Desmethyl, 45/46-Hydroxy Zotarolimus

---

| Fragment No. | Theoretical mass | Measured mass | $\Delta$ ppm |
|--------------|------------------|---------------|--------------|
| 1            | 320.11046        | 320.1098      | 2.1          |
| 2            | 355.26075        | 355.25998     | 2.2          |
| 3            | 369.2261         | 369.22538     | 2.0          |
| 4            | 397.22101        | 397.22005     | 2.4          |
| 5            | 411.21420        | 411.21375     | 1.1          |
| 6            | 429.22476        | 429.22406     | 1.6          |
| 7            | 443.24041        | 443.2396      | 1.8          |
| 8            | 455.20402        | 455.20289     | 2.5          |
| 9            | 461.25097        | 461.24999     | 2.1          |
| 10           | 598.29865        | 598.29769     | 1.6          |
| 11           | 616.30922        | 616.30779     | 2.3          |
| 12           | 631.38299        | 631.38255     | 0.7          |
| 13           | 990.54101        | 990.53986     | 1.2          |



# Structural Confirmation of 16-O-Desmethyl, 45/46-Hydroxy Zotarolimus

| Zotarolimus Fragments    | 16-O-desmethyl, 45/46-hydroxy-Zotarolimus Fragments | Comments                                      |                                                                                           |
|--------------------------|-----------------------------------------------------|-----------------------------------------------|-------------------------------------------------------------------------------------------|
| 320.11046                | 320.1098                                            | no hydroxylation, no desmethylation           | Rules out 11, 12, 14, or piperidine-OH                                                    |
| 369.2261                 | 369.22538                                           | no hydroxylation, no desmethylation           | Rules out 47, 48, or 49-OH/ Rules out 39-O-desmethyl                                      |
| 397.22101                | 397.22005                                           | no hydroxylation, no desmethylation           | Rules out 47, 48, or 49-OH/ Rules out 39-O-desmethyl                                      |
| 409.23493                | 411.21375                                           | hydroxylation, desmethylation                 | 11, 12, 14, 23, 24, 25, 45, or 46-OH present/ confirms 27-O-desmethyl                     |
| 427.2455                 | 429.22406                                           | hydroxylation, desmethylation                 | 11, 12, 14, 23, 24, 25, 45, or 46-OH present/ confirms 27-O-desmethyl                     |
| 413.26623                | 415.24499                                           | hydroxylation, desmethylation (low intensity) | 11, 12, 14, 23, 24, 25, 45, or 46-OH present/ 16- or 27-O-desmethyl present               |
| 485.25097                | 487.25023                                           | hydroxylation, desmethylation (low intensity) | 11, 12, 14, 23, 24, 25, 45, or 46-OH present/ 16- or 27-O-desmethyl present               |
| 582.30374                | 584.30336                                           | hydroxylation, desmethylation                 | 11, 12, 14, 23, 24, 25, 45, 46, or Piperidine-OH present/ confirms 27-O-desmethyl present |
| 453.22476                | 455.20289                                           | hydroxylation, desmethylation                 | 11, 12, 14, 23, 24, 25, 45, or 46-OH present/ confirms 27-O-desmethyl                     |
| 459.27171                | 461.24999                                           | hydroxylation, desmethylation                 | 11, 12, 14, 23, 24, 25, 45, 46, or Piperidine-OH present/ 16- or 27-O-desmethyl present   |
| 614.32995                | 616.30779                                           | hydroxylation, desmethylation                 | 11, 12, 14, 23, 24, 25, 45, 46, or Piperidine-OH present/ 16- or 27-O-desmethyl present   |
| 659.41429                | 661.3935                                            | hydroxylation, desmethylation                 | 23, 24, 25, 45, 46, 47, 48, or 49-OH present/ 27- or 39-O-desmethyl present               |
| 988.56174                | 990.53986                                           | hydroxylation, desmethylation                 |                                                                                           |
| Characteristic Fragments |                                                     |                                               | 351, 397                                                                                  |
| Determinant patterns     |                                                     |                                               | Methanol loss<br>383- 32 = 351<br>429- 32 = 397                                           |

Didesmethyl Zotarolimus Metabolites, ( $m/z = 960.53044$ )

## Didesmethyl Zotarolimus metabolites

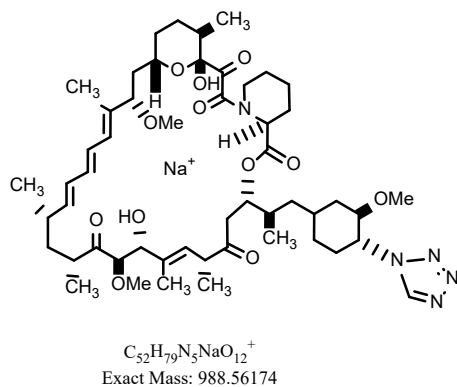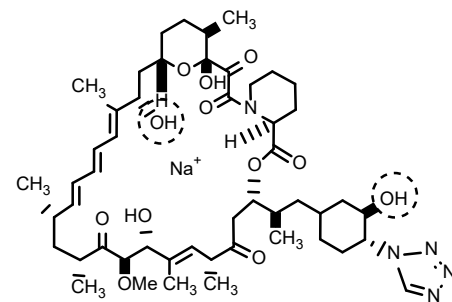

16,39-O-didesmethyl zotarolimus  
 $C_{50}H_{75}N_5NaO_{12}^+$   
 Exact Mass: 960.53044

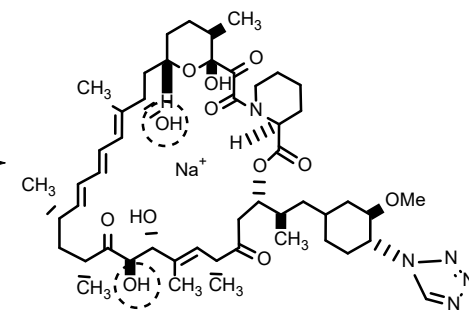

16, 27-O-didesmethyl zotarolimus  
 $C_{50}H_{73}N_5NaO_{12}^+$   
 Exact Mass: 958.51479

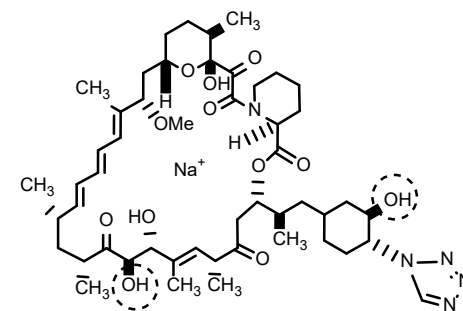

27, 39-O-didesmethyl zotarolimus

$C_{50}H_{75}N_5NaO_{12}^+$   
 Exact Mass: 960.53044

# 16, 39-O-Didesmethyl Zotarolimus Metabolites

## Extracted Ion Chromatogram (EIC), m/z = 960.53044

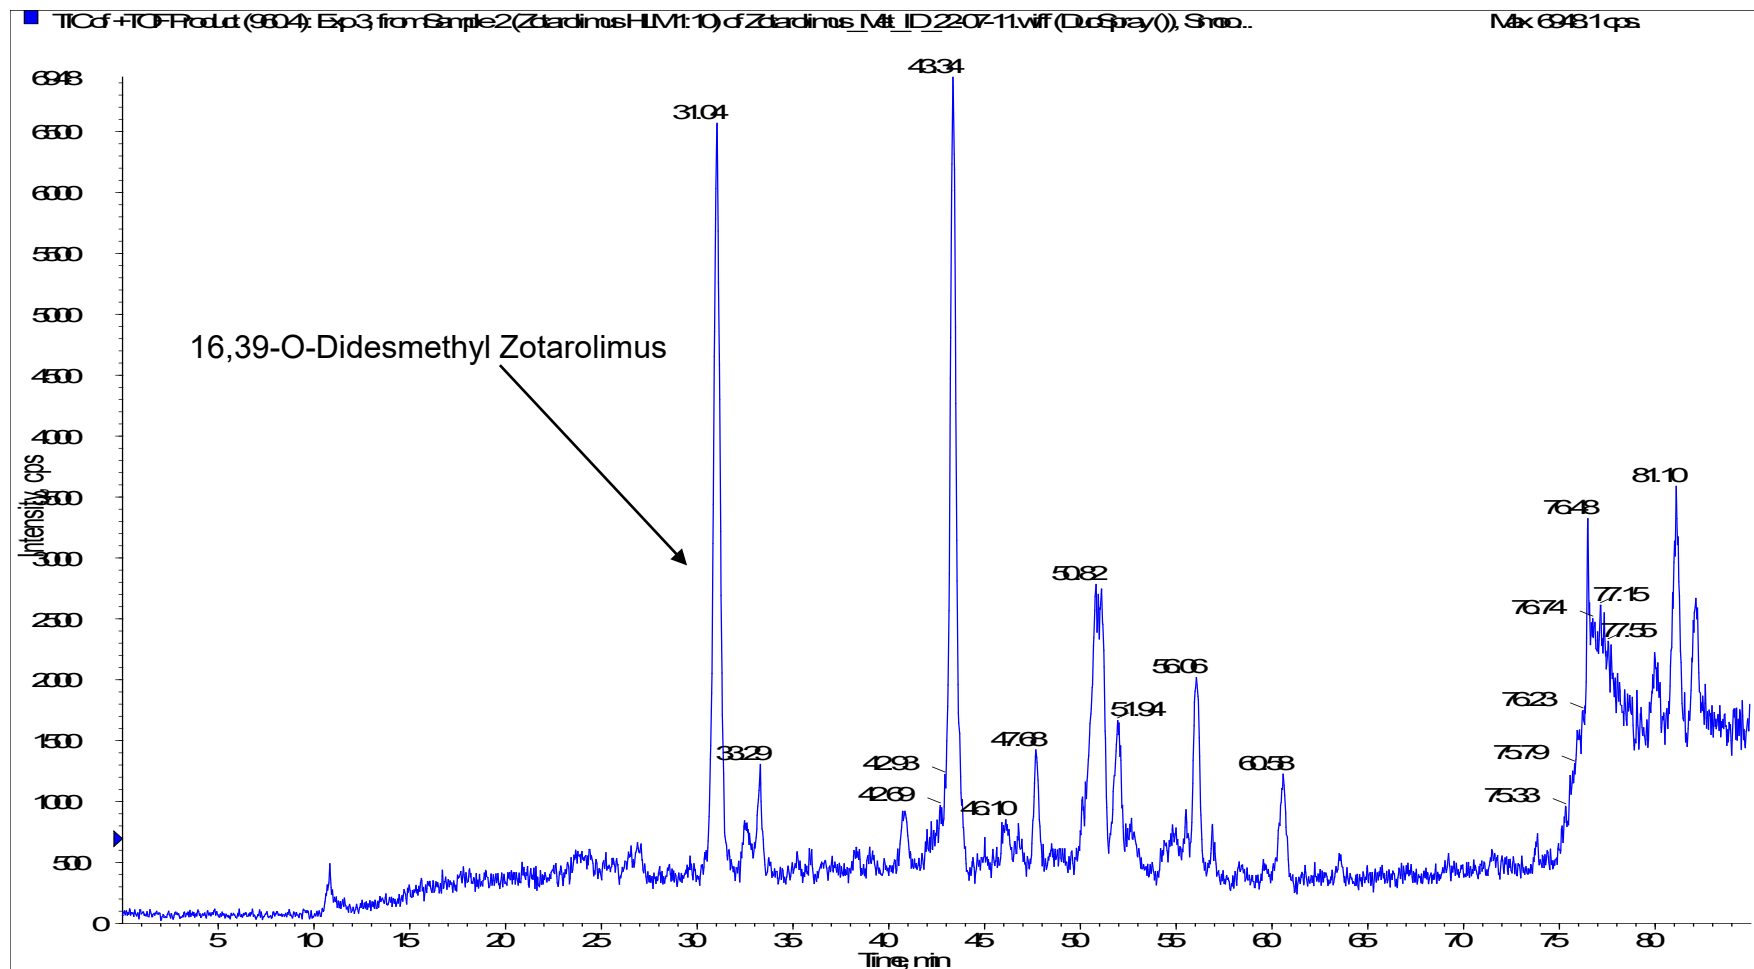

16, 39-O-didesmethyl Zotarolimus, m/z = 1020.55157

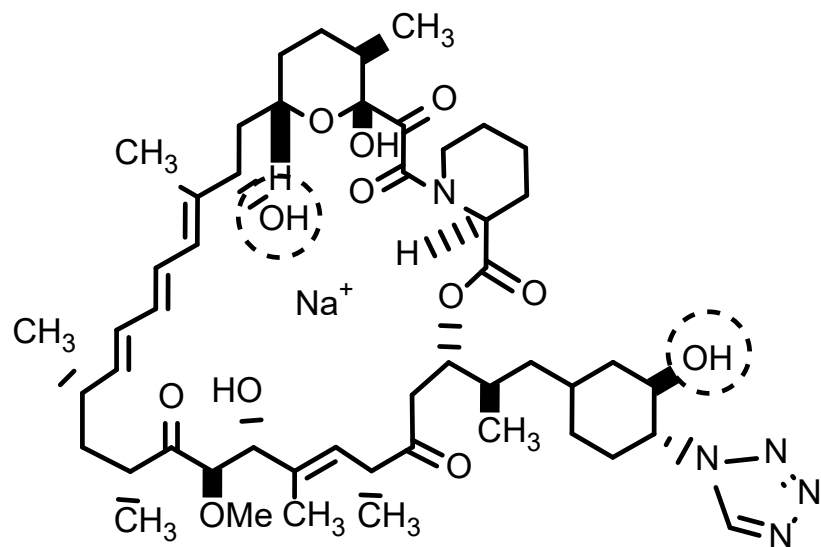

16,39-O-didesmethyl zotarolimus

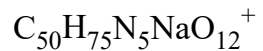

Exact Mass: 960.53044



# 16, 39-O-Didesmethyl Zotarolimus

## Mass Spectrum (TOF Fragmentation)

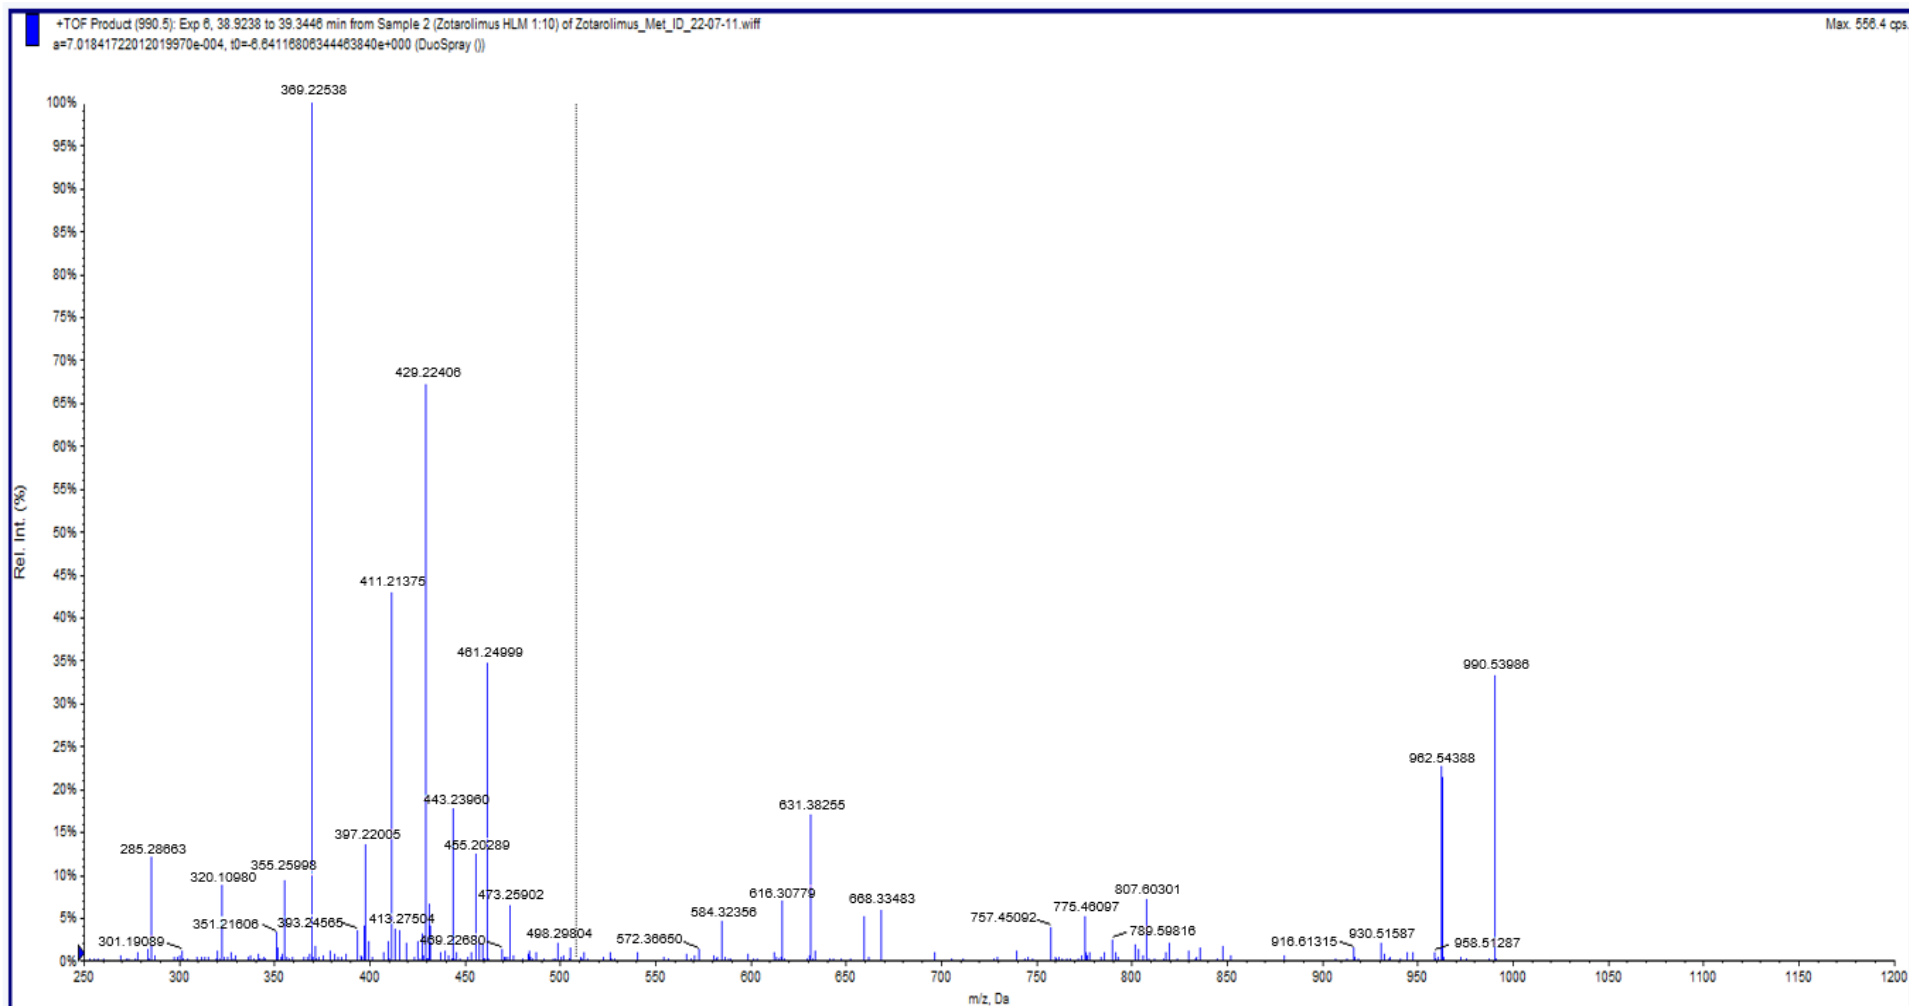

## $\Delta$ ppm of 16, 39-O-Didesmethyl Zotarolimus

---

| Fragment No. | Theoretical mass | Measured mass | $\Delta$ ppm |
|--------------|------------------|---------------|--------------|
| 1            | 320.11046        | 320.11003     | 1.3          |
| 2            | 355.21045        | 355.21007     | 1.1          |
| 3            | 381.24002        | 381.23965     | 1.0          |
| 4            | 397.22101        | 397.22066     | 0.9          |
| 5            | 409.23493        | 409.23466     | 0.7          |
| 6            | 427.24550        | 427.24489     | 1.4          |
| 7            | 441.26115        | 441.26088     | 0.6          |
| 8            | 453.22476        | 453.22409     | 1.5          |
| 9            | 582.30374        | 582.30297     | 1.3          |
| 10           | 600.31430        | 600.31387     | 0.7          |
| 11           | 645.39864        | 645.39803     | 0.9          |
| 12           | 680.32660        | 680.32599     | 0.9          |
| 13           | 741.45616        | 741.45587     | 0.4          |
| 14           | 769.45107        | 769.45006     | 1.3          |
| 15           | 960.53044        | 960.52965     | 0.8          |

# 16, 39-O-Didesmethyl Zotarolimus Fragmentation Pattern

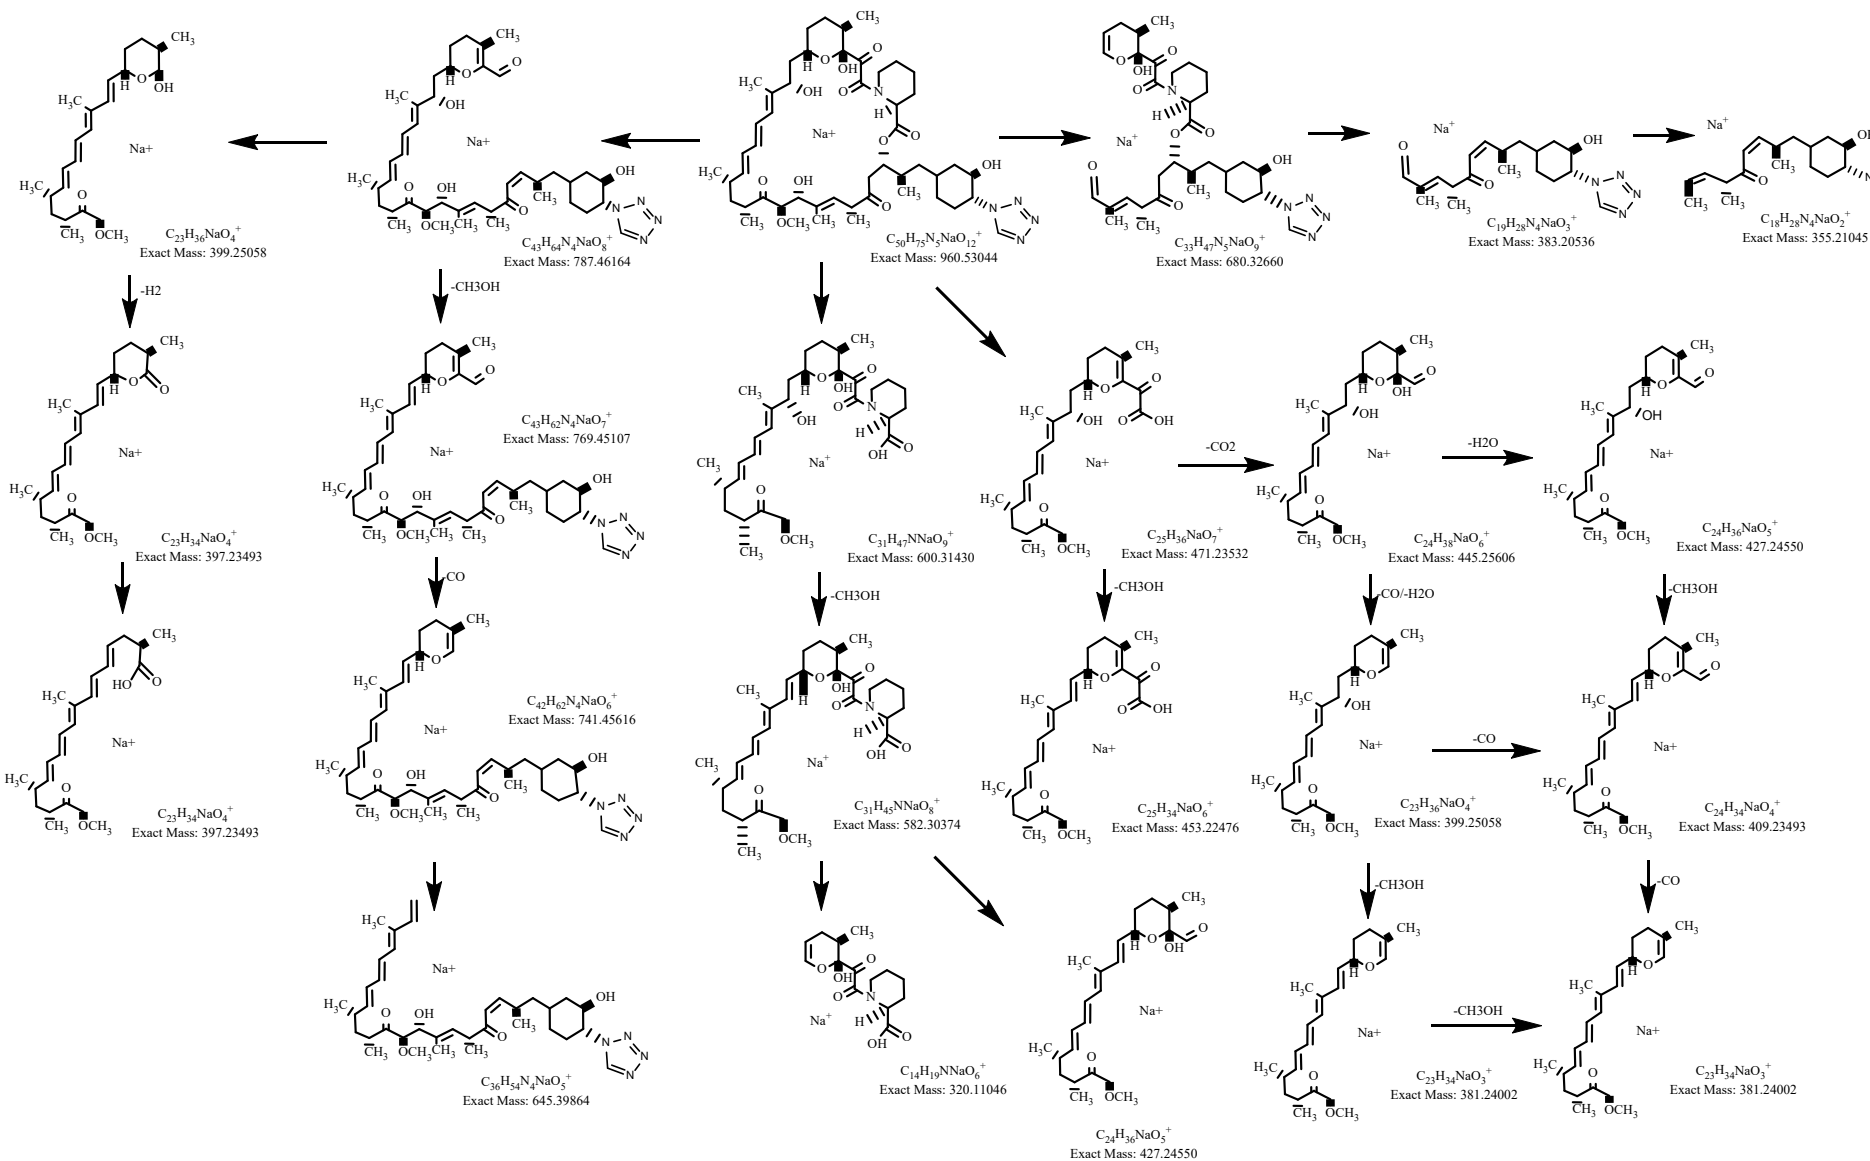

## 16, 39-O-Didesmethyl Zotarolimus Characteristic Fragmentation Pattern

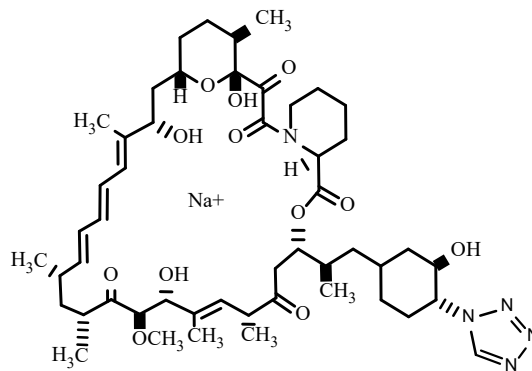

Chemical Formula:  $\text{C}_{50}\text{H}_{75}\text{N}_5\text{NaO}_{12}^+$   
Exact Mass: 960.53044

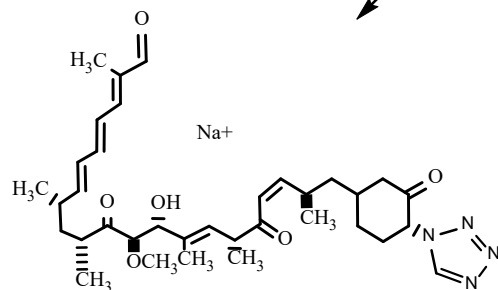

$\text{C}_{35}\text{H}_{50}\text{N}_4\text{NaO}_6^+$   
Exact Mass: 645.36226

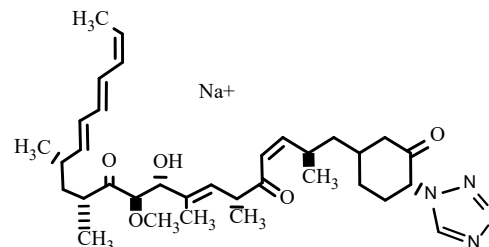

$\text{C}_{34}\text{H}_{50}\text{N}_4\text{NaO}_5^+$   
Exact Mass: 617.36734

## Structural Confirmation of 16, 39-O-Didesmethyl Zotarolimus

| Zotarolimus<br>Fragments | 16,39-O-<br>Didesmethyl<br>Zotarolimus<br>Fragments | Comments         |                                   |
|--------------------------|-----------------------------------------------------|------------------|-----------------------------------|
|                          |                                                     |                  |                                   |
| 320.11046                | 320.11023                                           | no demethylation | Not conclusive                    |
| 369.22610                | 355.21045                                           | Demethylation    | Confirms 39-O-desmethyl           |
| 381.24002                | 381.23965                                           | no demethylation | Confirms 16-O-desmethyl           |
| 397.23493                | 397.22066                                           | no demethylation | Confirms 16-O-desmethyl           |
| 409.23493                | 409.23466                                           | no demethylation | confirms 16-O-desmethyl           |
| 441.26115                | 427.24489                                           | Demethylation    | 16, or 27-O-desmethyl present     |
| 453.22476                | 453.22409                                           | no demethylation | Rules out out 27-O-desmethyl      |
| 582.30374                | 582.30297                                           | no demethylation | Rules out out 27-O-desmethyl      |
| 614.32995                | 600.31387                                           | Demethylation    | 16, and 27-O-desmethyl present    |
| 659.41429                | 645.39803                                           | Demethylation    | 27, or 39-O-desmethyl present     |
| 694.34225                | 680.32599                                           | Demethylation    | Confirms 39-O-desmethyl           |
| 755.47181                | 741.45587                                           | Demethylation    | 16, 27, or 39-O-desmethyl present |
| 783.46672                | 769.45006                                           | Demethylation    | 16, 27, or 39-O-desmethyl present |
| 960.53044                | 960.52965                                           | no demethylation |                                   |
| Characteristic Fragments | 355, 381, 397,<br>409, 617, and<br>645              |                  |                                   |
| Determinant patterns     |                                                     |                  |                                   |

27, 39-O-didesmethyl Zotarolimus,  $m/z = 1020.55157$

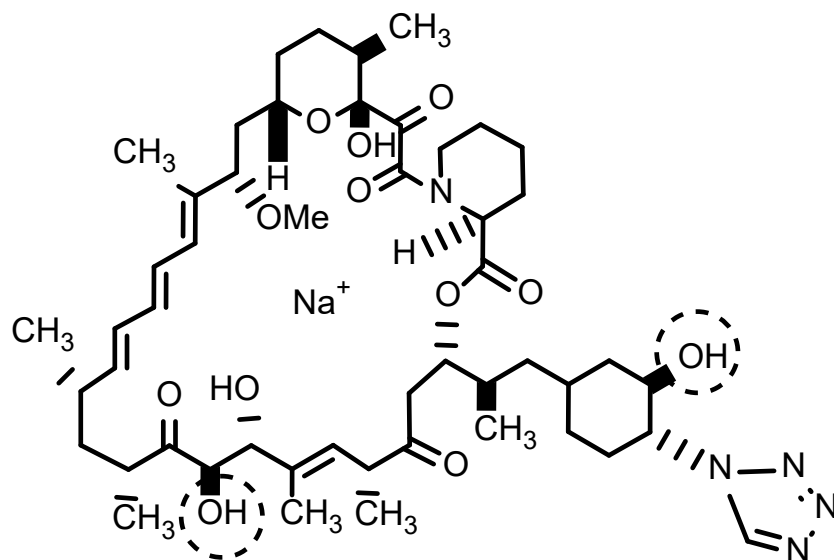

27, 39-O-didesmethyl zotarolimus

$C_{50}H_{75}N_5NaO_{12}^+$   
Exact Mass: 960.53044

# 27, 39-O-Didesmethyl Zotarolimus Metabolites Extracted Ion Chromatogram (EIC), m/z = 960.53044

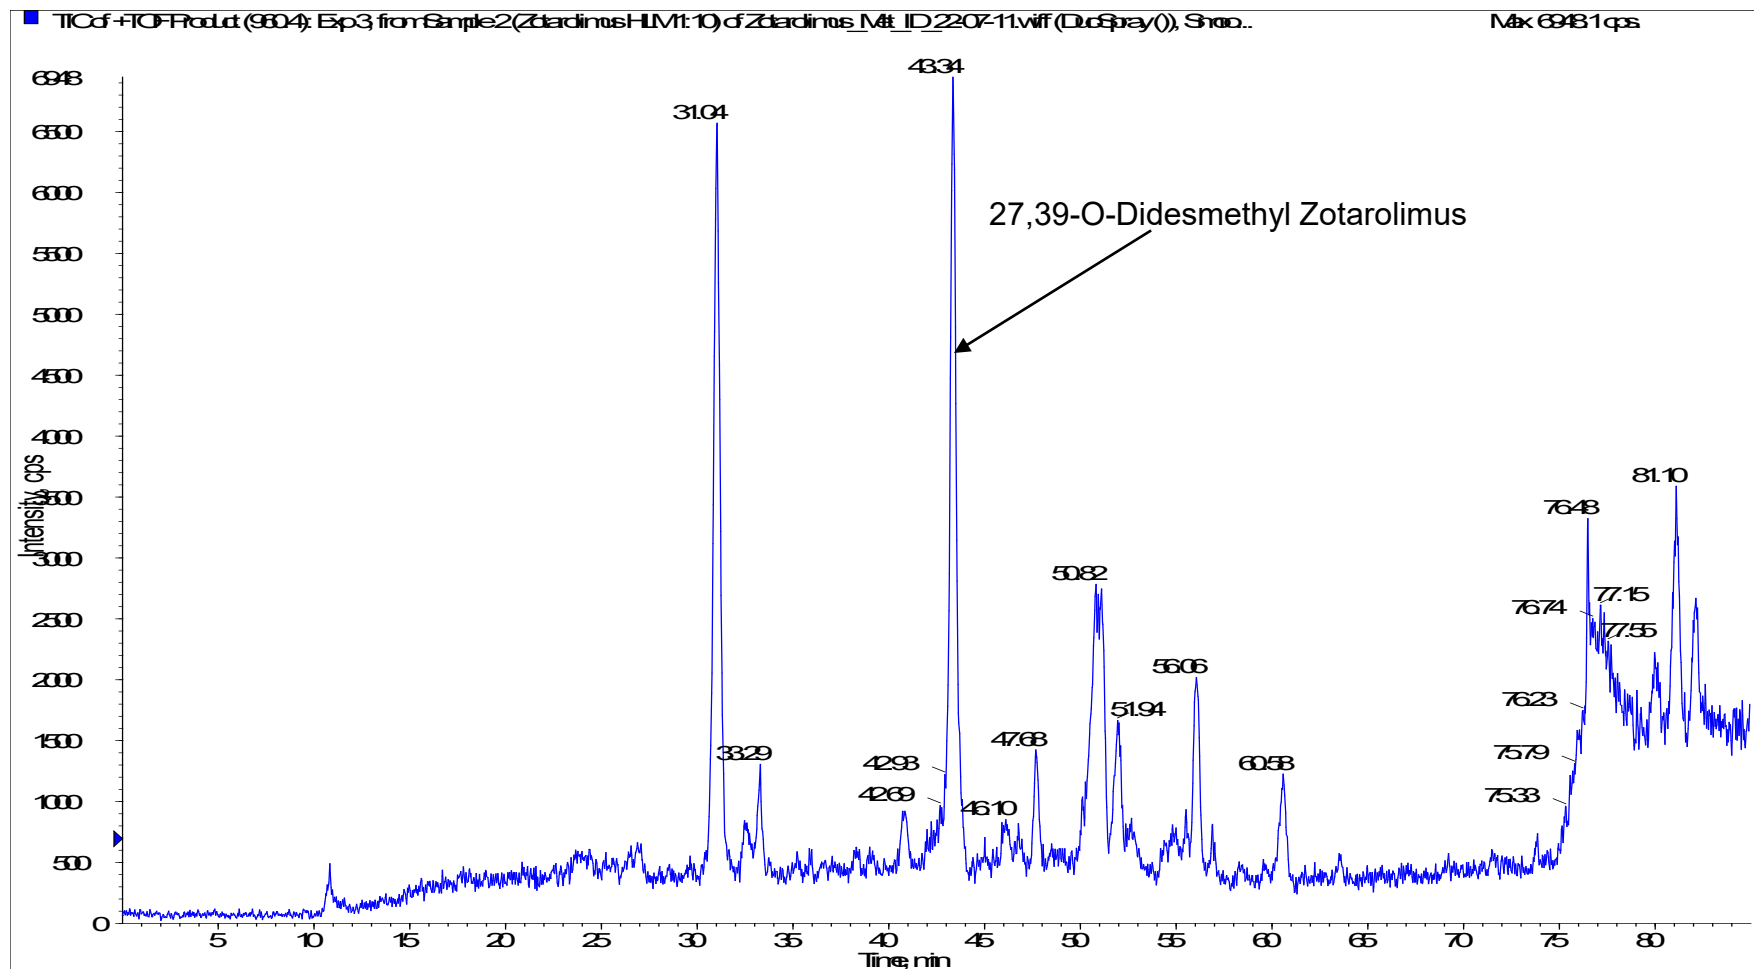

# 27, 39-O-Didesmethyl Zotarolimus

## Mass Spectrum (TOF Fragmentation)

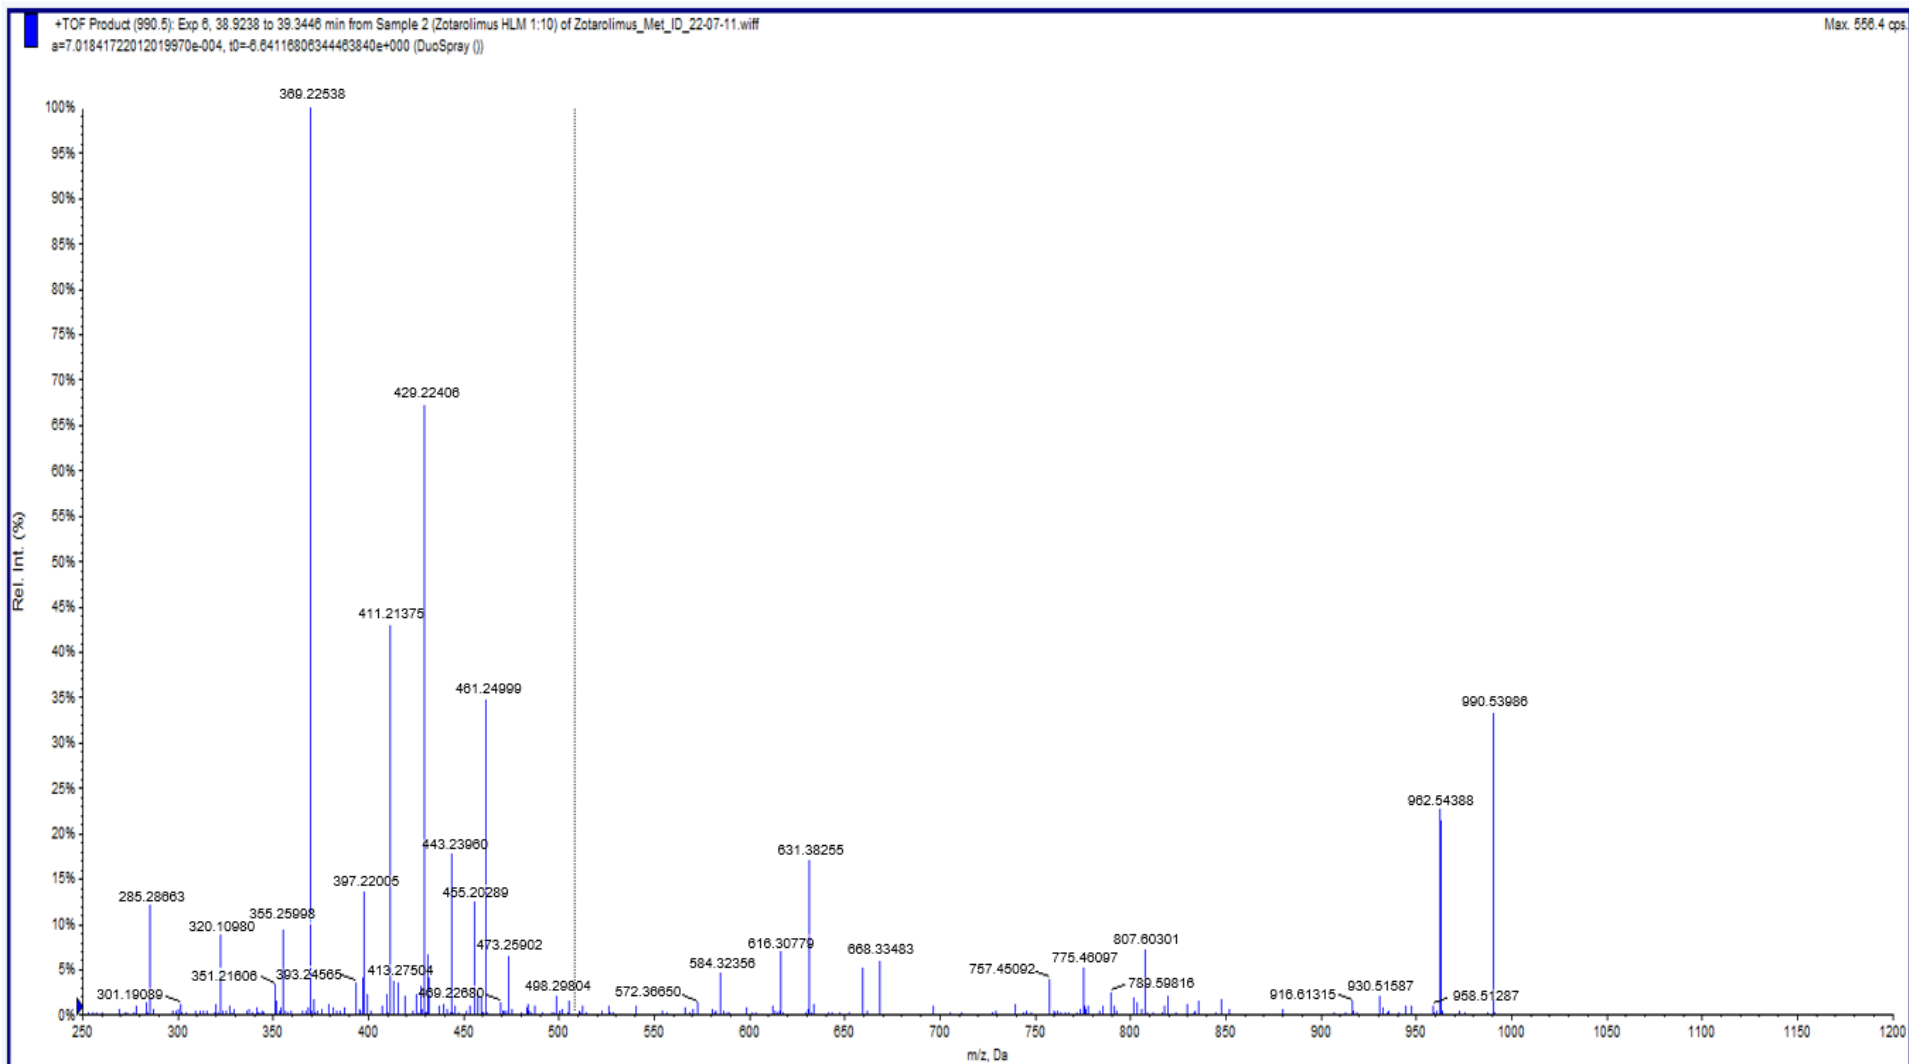



## $\Delta$ ppm of 27, 39-O-Didesmethyl Zotarolimus

---

| Fragment No. | Theoretical mass | Measured mass | $\Delta$ ppm |
|--------------|------------------|---------------|--------------|
| 1            | 320.11046        | 320.10993     | 1.7          |
| 2            | 355.21045        | 355.20999     | 1.3          |
| 3            | 367.22437        | 367.22396     | 1.1          |
| 4            | 383.21928        | 383.21879     | 1.3          |
| 5            | 395.21928        | 395.21897     | 0.8          |
| 6            | 413.22985        | 413.22936     | 1.2          |
| 7            | 427.24550        | 427.24499     | 1.2          |
| 8            | 439.20911        | 439.20855     | 1.3          |
| 9            | 568.28809        | 568.28763     | 0.8          |
| 10           | 600.31430        | 600.31357     | 1.2          |
| 11           | 631.38299        | 631.38236     | 1.0          |
| 13           | 727.44051        | 727.44003     | 0.7          |
| 14           | 755.43542        | 755.43487     | 0.7          |
| 15           | 960.53044        | 960.52938     | 1.1          |

# 27, 39-O-Didesmethyl Zotarolimus Fragmentation Pattern

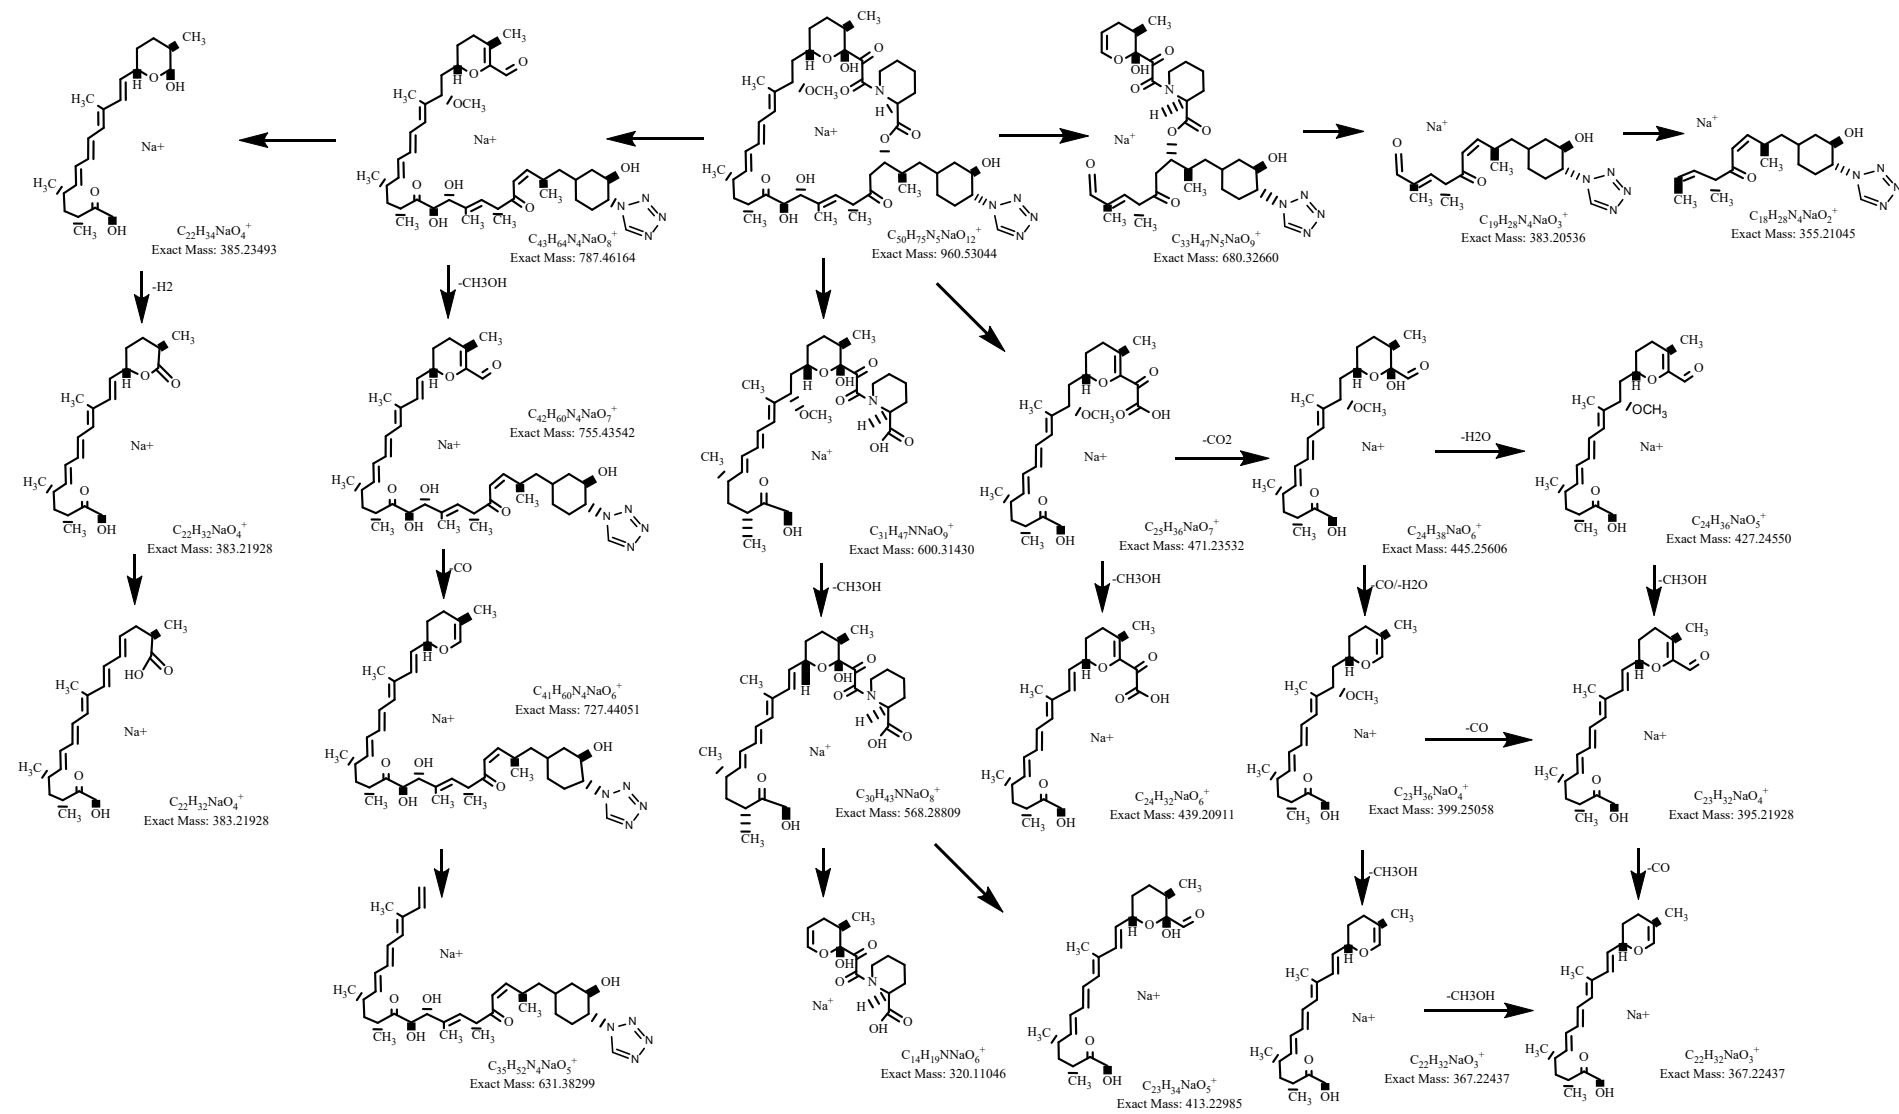

## Structural Confirmation of 27, 39-O-Didesmethyl Zotarolimus

| Zotarolimus Fragments    | 27,39-O-Didesmethyl Zotarolimus Fragments |                  |                                                                                           |
|--------------------------|-------------------------------------------|------------------|-------------------------------------------------------------------------------------------|
|                          |                                           | Comments         |                                                                                           |
| 320.11046                | 320.10993                                 | no demethylation | Not conclusive                                                                            |
| 369.22610                | 355.20999                                 | Demethylation    | Confirms 39-O-desmethyl                                                                   |
| 381.24002                | 367.22396                                 | Demethylation    | Confirms 27-O-desmethyl                                                                   |
| 409.23493                | 395.21897                                 | Demethylation    | Confirms 27-O-desmethyl                                                                   |
| 427.24550                | 413.22936                                 | Demethylation    | Confirms 27-O-desmethyl                                                                   |
| 441.26115                | 427.24499                                 | Demethylation    | 16, or 27-O-desmethyl present                                                             |
| 453.22476                | 439.20855                                 | Demethylation    | Confirms 27-O-desmethyl                                                                   |
| 485.25097                | 471.23532                                 | Demethylation    | 16, or 27-O-desmethyl present                                                             |
| 614.32995                | 600.31357                                 | Demethylation    | 16, and 27-O-desmethyl present                                                            |
| 659.41429                | 631.38236                                 | Demethylation    | Confirms 27,39-O-didesmethyl                                                              |
| 694.34225                | 680.32599                                 | very low         | NA                                                                                        |
| 755.47181                | 727.44003                                 | Demethylation    | 16, 27, or 39-O-desmethyl present                                                         |
| 783.46672                | 755.43487                                 | Demethylation    | 16, 27, or 39-O-desmethyl present                                                         |
| 960.53044                | 960.52938                                 | no demethylation |                                                                                           |
| Characteristic Fragments | 355, 367, 395, 413, 439                   |                  |                                                                                           |
| Determinant patterns     |                                           |                  | No water loss possible for fragments 367, 383, 385, 395, 413, 427, 439, 471, 568, and 600 |

16, 27-O-didesmethyl Zotarolimus, m/z = 1020.55157

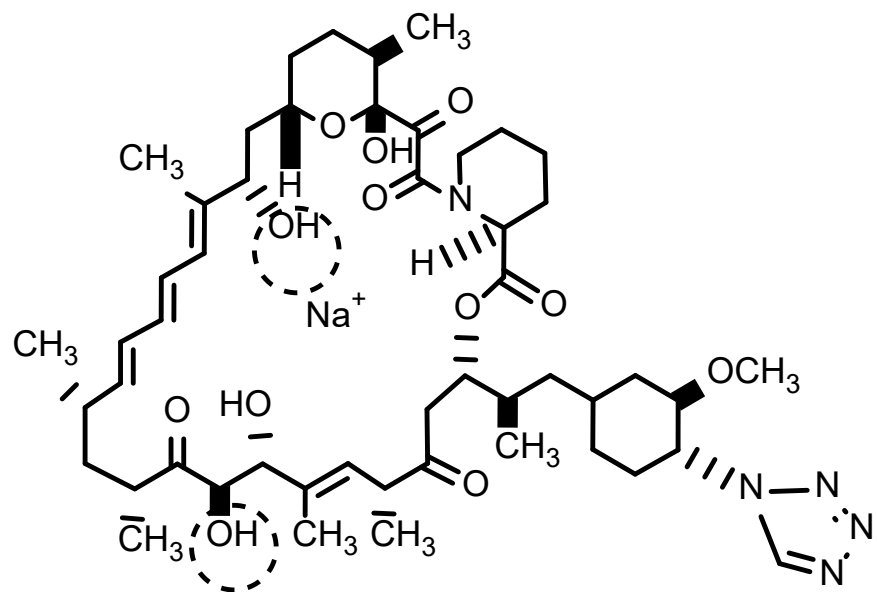

16, 27-O-didesmethyl zotarolimus

$\text{C}_{50}\text{H}_{75}\text{N}_5\text{NaO}_{12}^+$   
Exact Mass: 960.53044

# 16, 27-O-Didesmethyl Zotarolimus Metabolites

## Extracted Ion Chromatogram (EIC), $m/z = 960.53044$

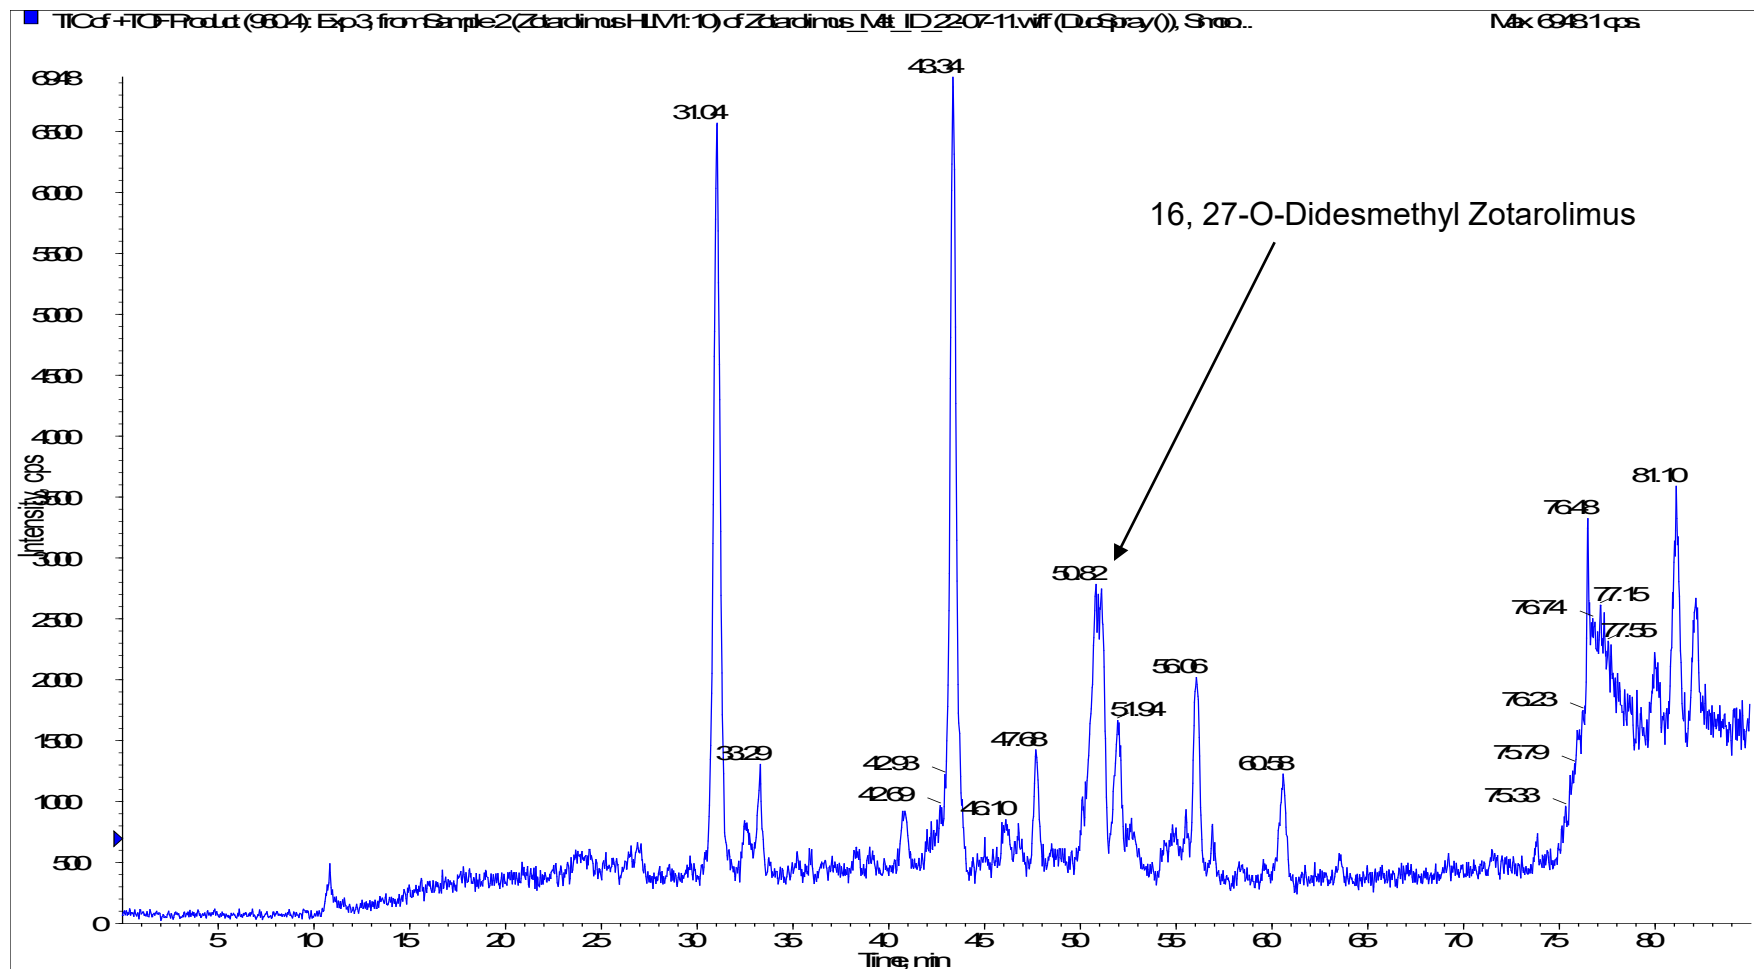

# 16, 27-O-Didesmethyl Zotarolimus

## Mass Spectrum (TOF Fragmentation)

+TOF Product (960.4) Exp 3, 50.4481 to 51.2560 min from Sample 2 (Zotarolimus HLM 1:10) of Zotarolimus\_Met\_ID\_22-07-11.wiff  
a=7.01841722012019970e-004, 10=-8.64116808344483840e+000 (DuoSpray (j))

Max. 48.7 cps

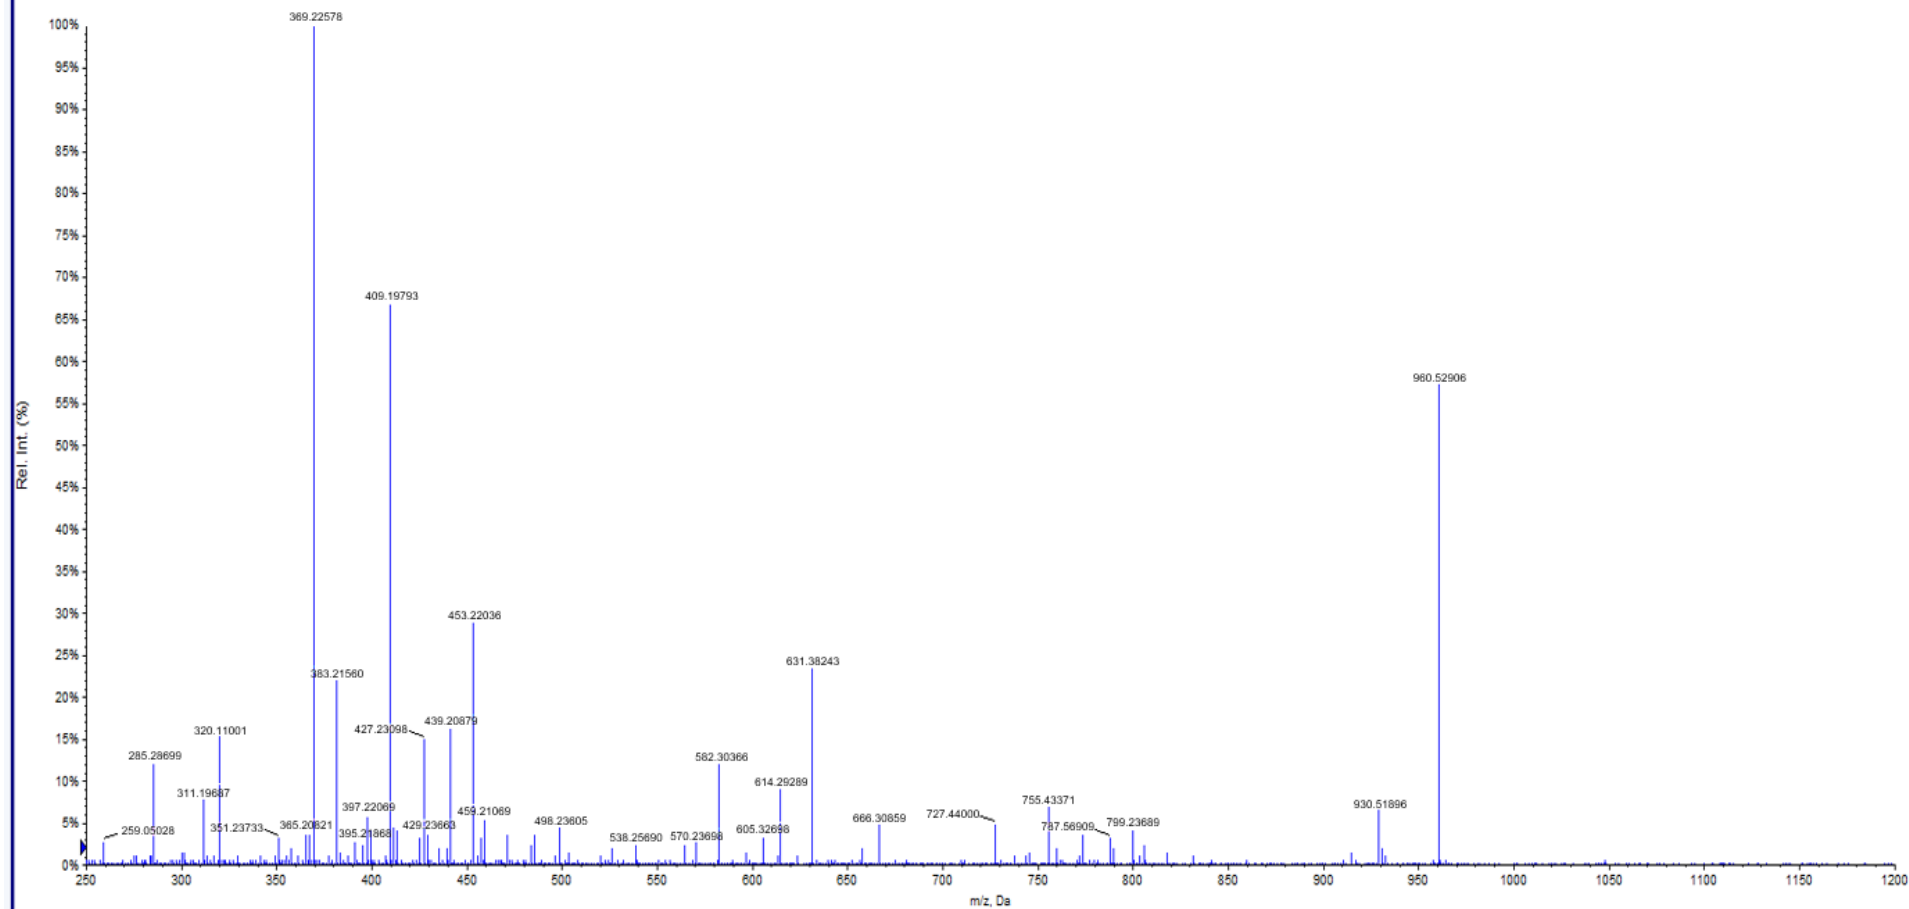

## $\Delta$ ppm of 16, 27-O-Didesmethyl Zotarolimus

---

| Fragment No. | Theoretical mass | Measured mass | $\Delta$ ppm |
|--------------|------------------|---------------|--------------|
| 1            | 320.11046        | 320.11001     | 1.4          |
| 2            | 369.22610        | 369.22578     | 0.9          |
| 3            | 397.22101        | 397.22069     | 0.8          |
| 4            | 383.21928        | 383.21860     | 1.8          |
| 5            | 395.21928        | 395.21868     | 1.5          |
| 6            | 409.19855        | 409.19793     | 1.5          |
| 7            | 427.23158        | 427.23098     | 1.4          |
| 8            | 439.20911        | 439.20879     | 0.7          |
| 9            | 568.28809        | 568.28703     | 1.9          |
| 10           | 600.31430        | ND            | NA           |
| 11           | 631.38299        | 631.38243     | 0.9          |
| 13           | 727.44051        | 727.44000     | 0.7          |
| 15           | 960.53044        | 960.52906     | 1.4          |

# 16, 27-O-Didesmethyl Zotarolimus Fragmentation Pattern

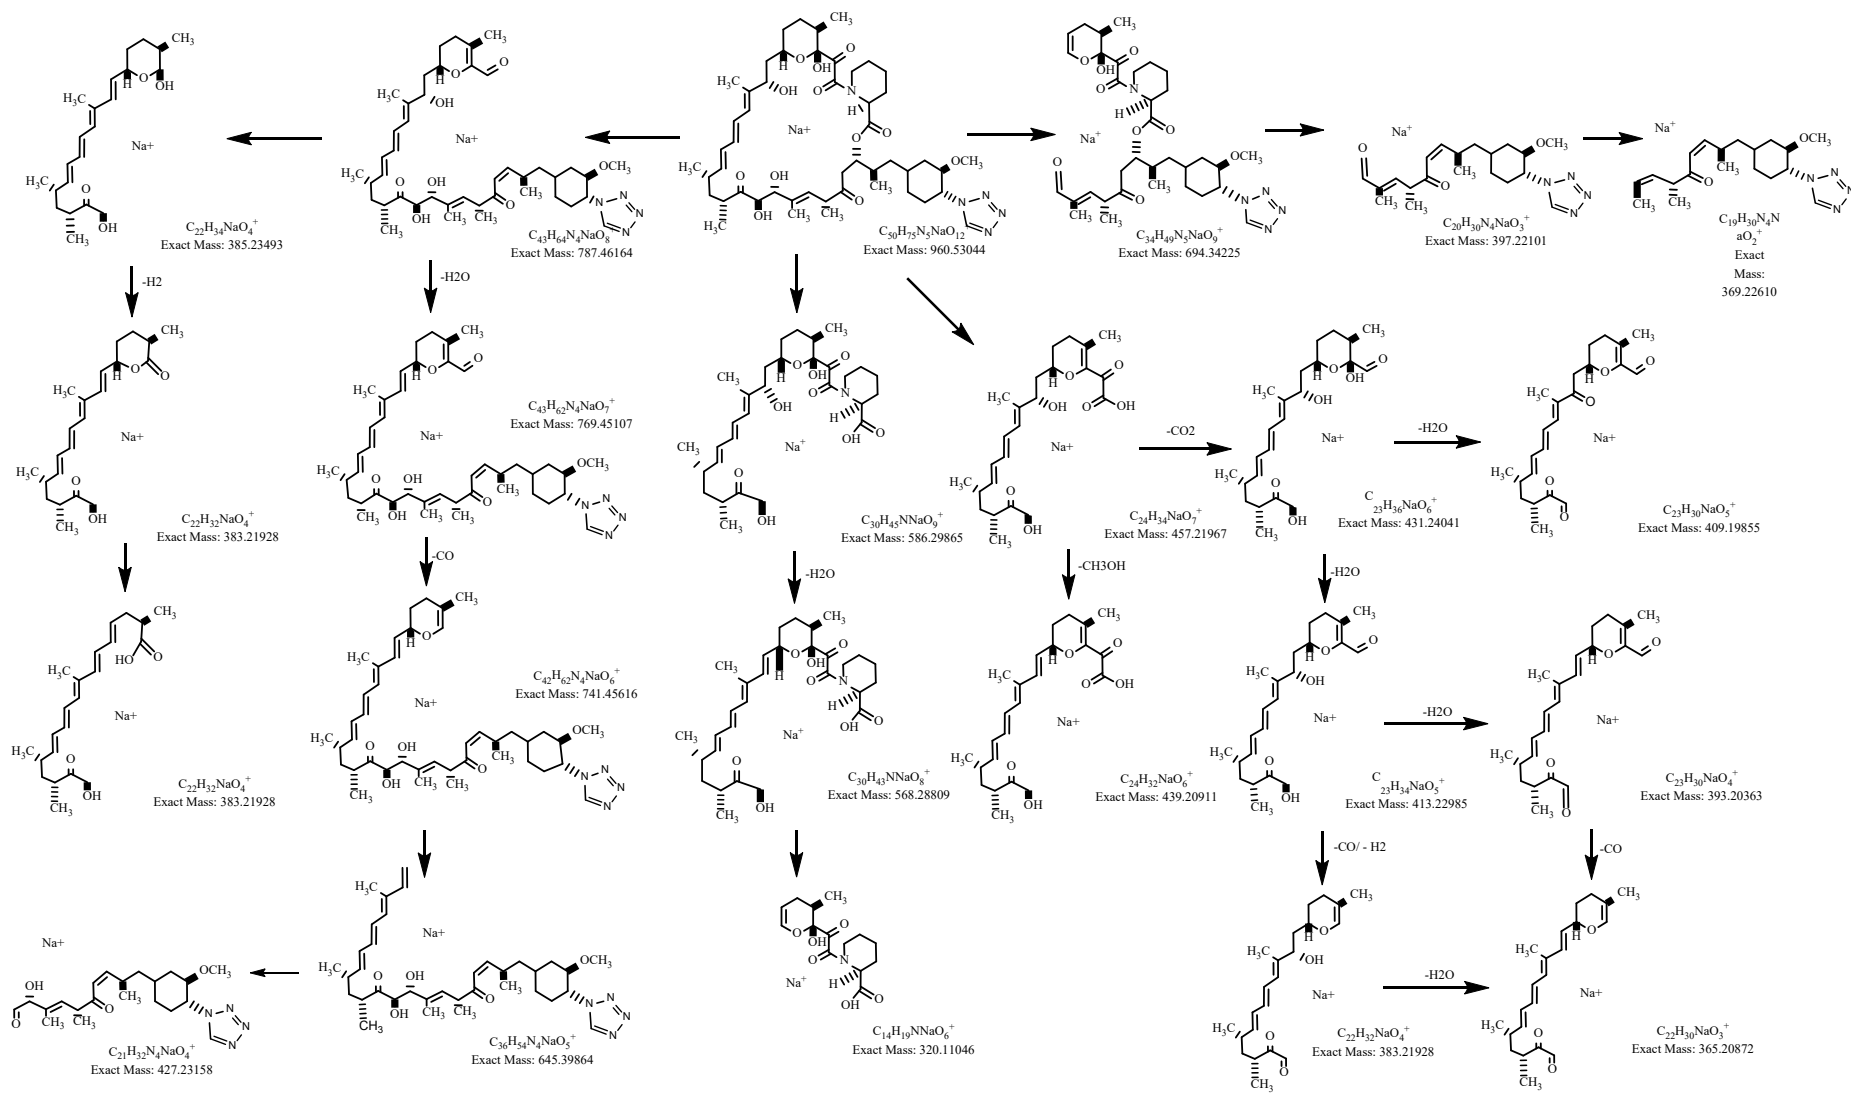



# 16, 27-O-Didesmethyl Zotarolimus Characteristic Fragmentation Pattern

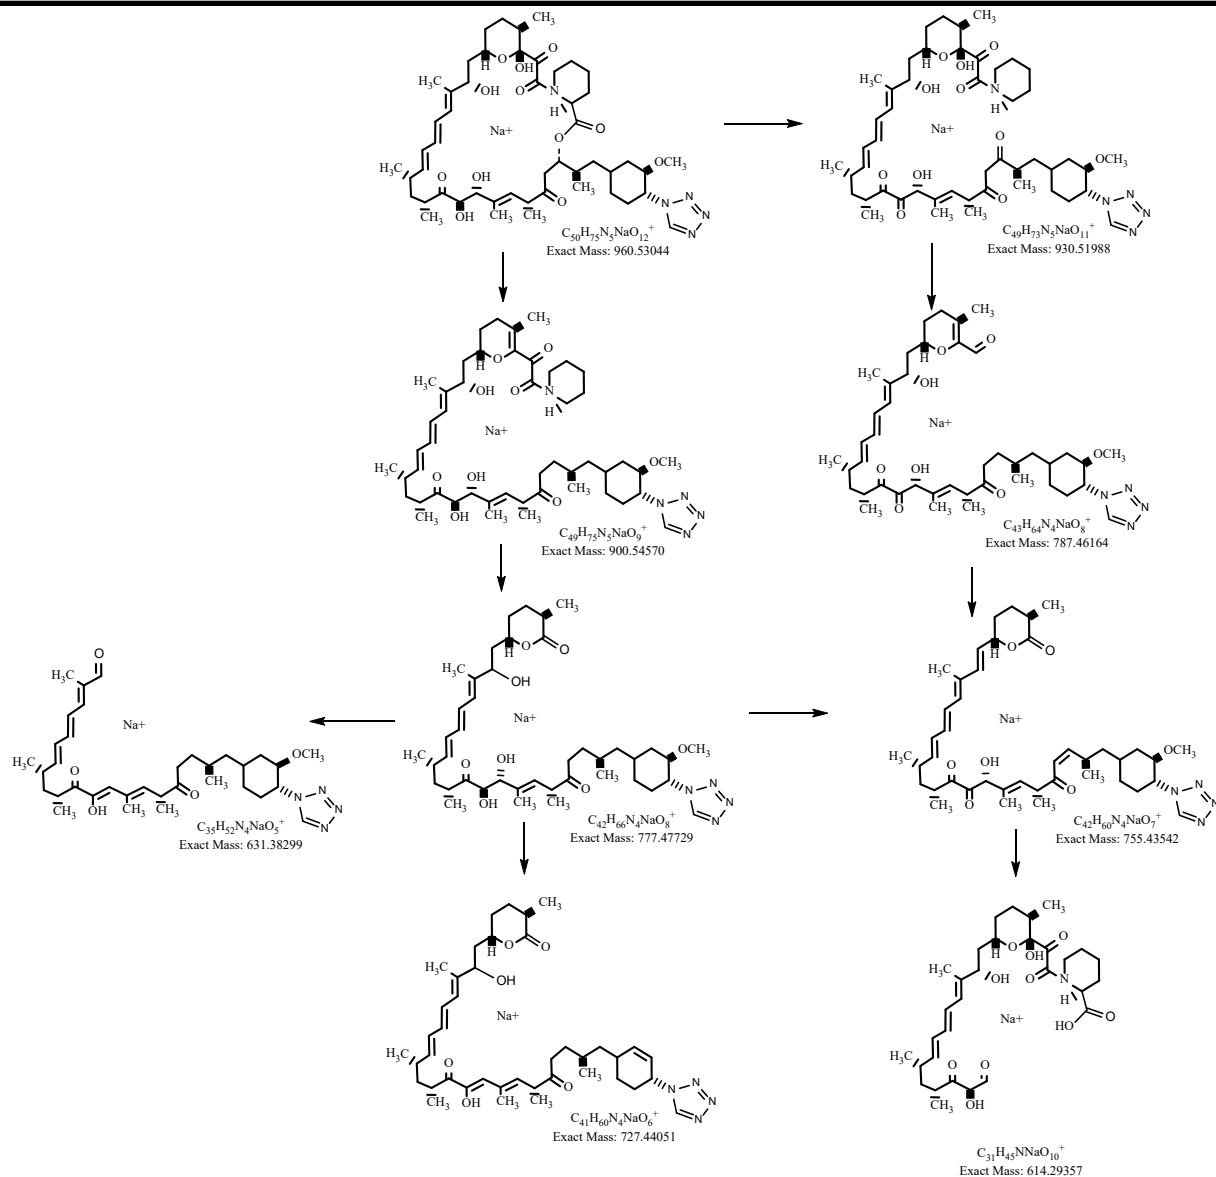

# Structural Confirmation of 16, 27-O-Didesmethyl Zotarolimus

| Zotarolimus<br>Fragments | 16,27-O-<br>Didesmethyl<br>Zotarolimus<br>Fragments | Comments                                           |                                                        |
|--------------------------|-----------------------------------------------------|----------------------------------------------------|--------------------------------------------------------|
|                          |                                                     |                                                    |                                                        |
| 320.11046                | 320.10993                                           | no demethylation                                   | Not conclusive                                         |
| 397.22101                | 369.22578                                           | Demethylation                                      | Rules out 39-O-desmethyl                               |
| 381.24002                | 367.22344                                           | Demethylation                                      | Confirms 27-O-desmethyl                                |
| 409.23493                | 395.21868                                           | Demethylation                                      | Confirms 27-O-desmethyl                                |
| 427.24550                | 413.22901                                           | Demethylation                                      | Confirms 27-O-desmethyl                                |
| 441.26115                | (413.22985) ND                                      | ND                                                 | NA                                                     |
| 453.22476                | 439.20879                                           | Demethylation                                      | Confirms 27-O-desmethyl                                |
| 485.25097                | 457.21885                                           | Demethylation (low intensity)                      | Confirms 16 and 27-O-desmethyl                         |
| 614.32995                | 568.28703                                           | Demethylation + water loss<br>(very low intensity) | Confirms 16 and 27-O-desmethyl                         |
| 659.41429                | 645.39864 (ND)                                      | ND                                                 | NA                                                     |
| 694.34225                | 694.34225 (ND)                                      | ND                                                 | NA                                                     |
| 755.47181                | 741.45616 (ND)                                      | ND                                                 | NA                                                     |
| 783.46672                | 769.45107 (ND)                                      | ND                                                 | NA                                                     |
| 960.53044                | 960.52906                                           | no demethylation                                   |                                                        |
| Characteristic Fragments | 383, 409, 439, 614,<br>and 631                      |                                                    |                                                        |
| Determinant patterns     |                                                     |                                                    | No water loss possible for fragments 383, 395, and 439 |

Dihydroxy Zotarolimus,  $m/z = 1020.55157$

## 11, 24-Dihydroxy Zotarolimus, m/z = 1020.55157

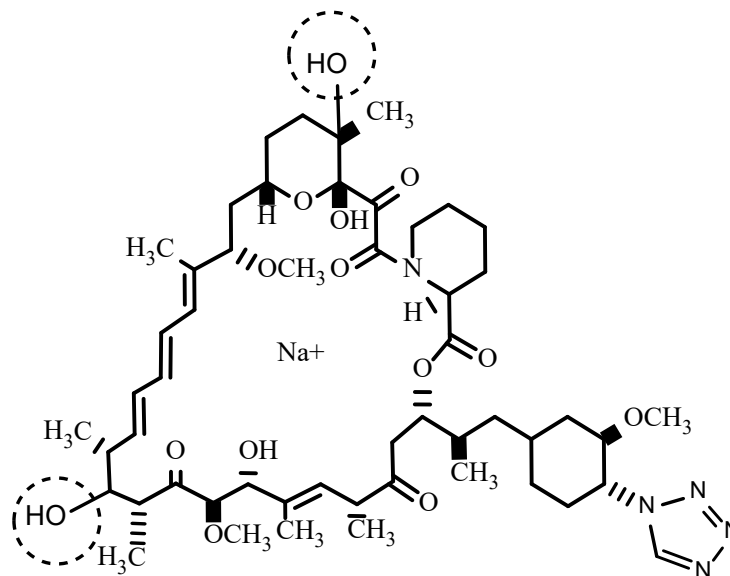

Chemical Formula: C<sub>52</sub>H<sub>79</sub>N<sub>5</sub>NaO<sub>14</sub><sup>+</sup>

Exact Mass: 1020.55157

11, 24-dihydroxy zotarolimus

# Dihydroxy Zotarolimus Metabolites

## Extracted Ion Chromatogram (EIC), $m/z = 1020.55157$

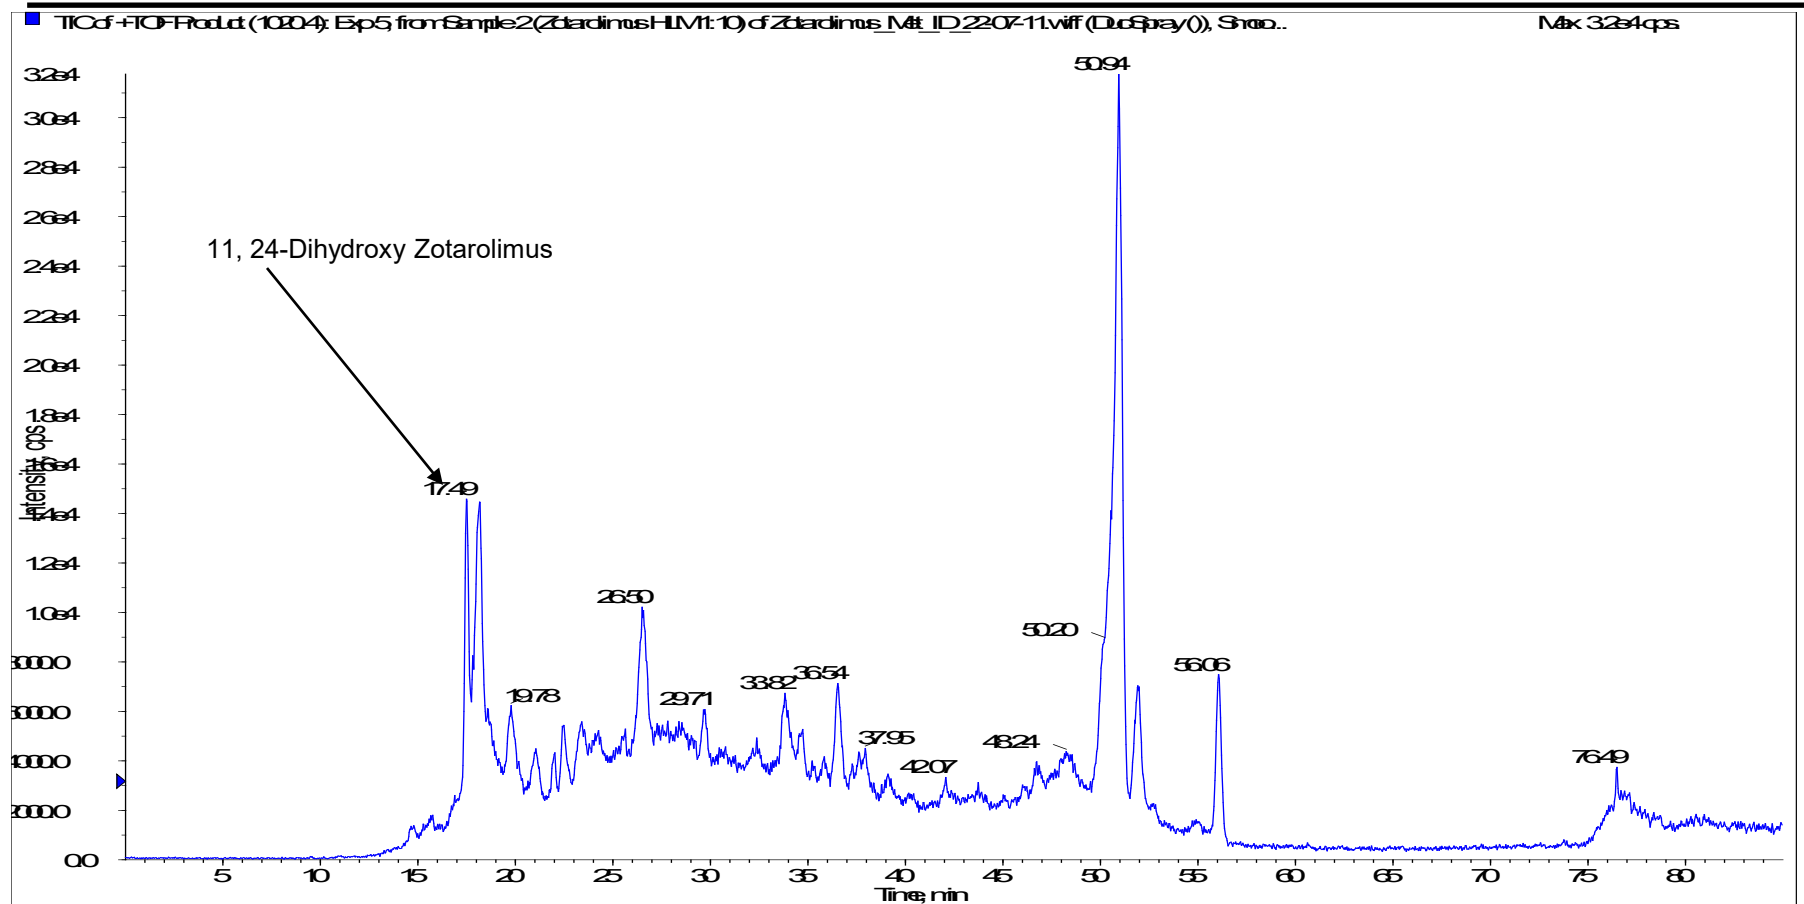

# 11, 24-Dihydroxy Zotarolimus

## Mass Spectrum (TOF Fragmentation)

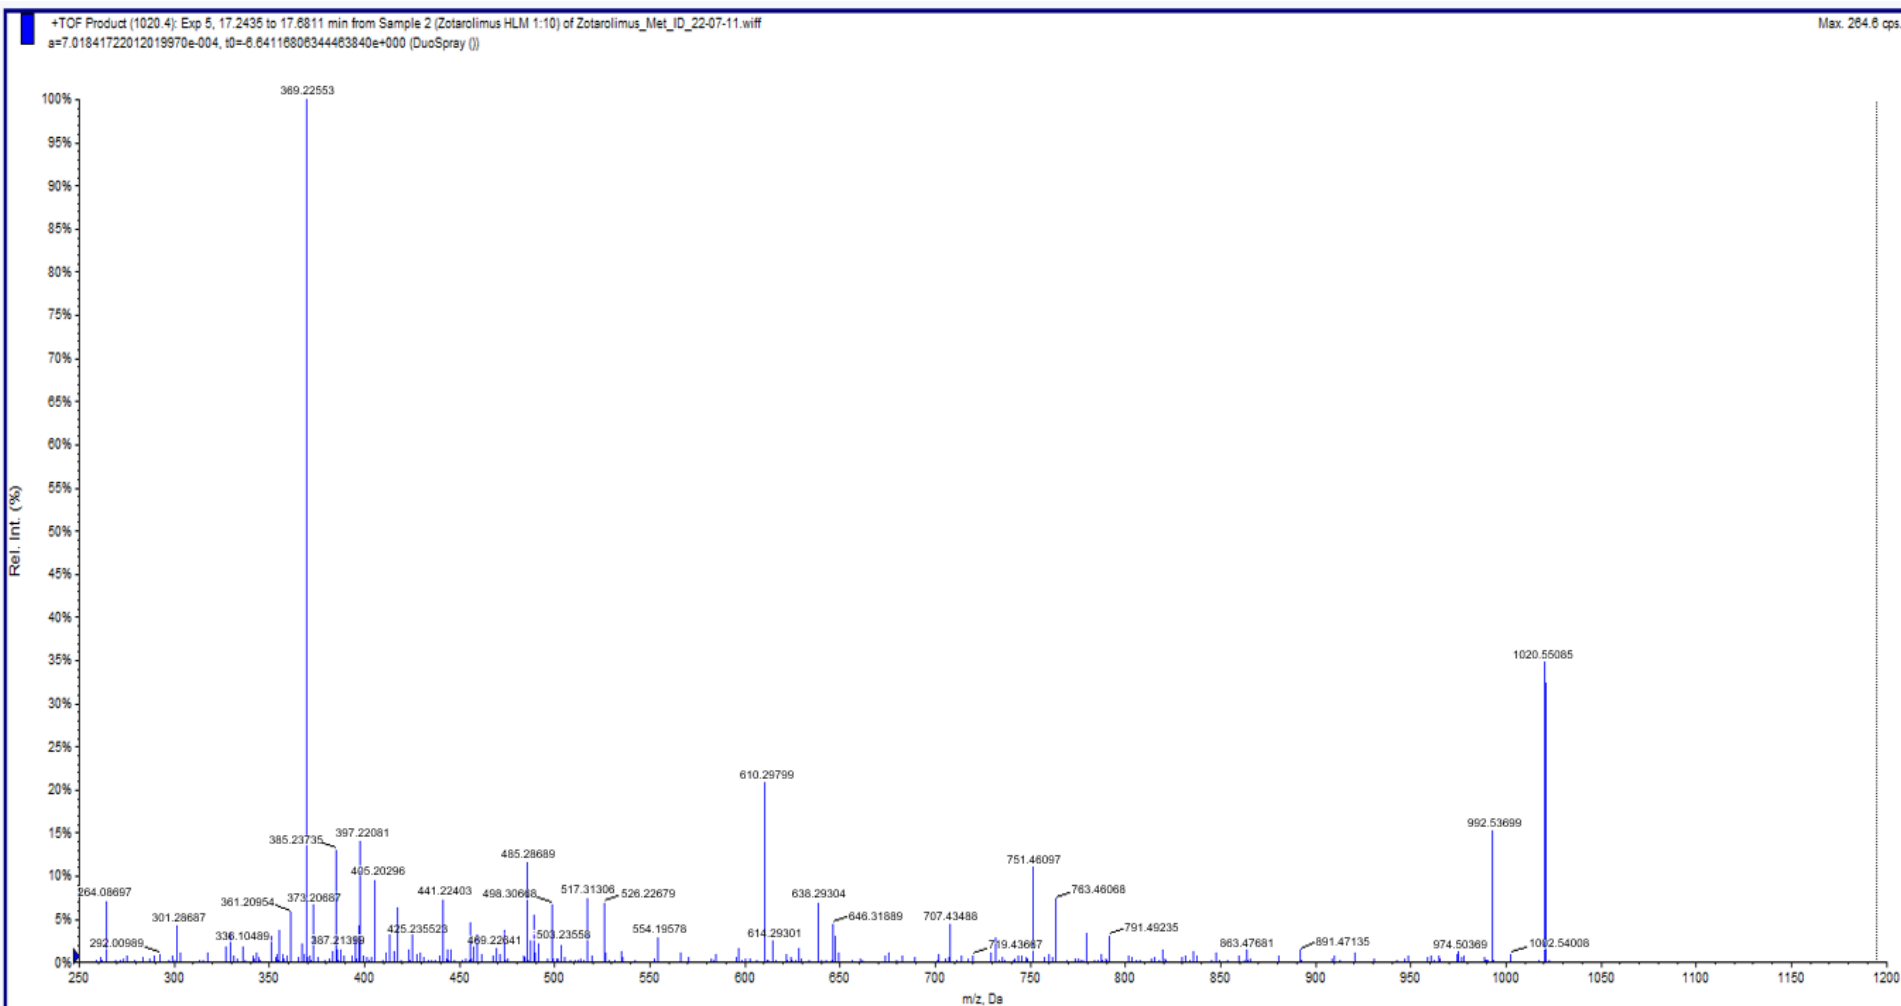

## $\Delta$ ppm of 11, 24-Dihydroxy Zotarolimus

---

| Fragment No. | Theoretical mass | Measured mass | $\Delta$ ppm |
|--------------|------------------|---------------|--------------|
| 1            | 336.10537        | 336.10489     | 1.4          |
| 2            | 369.22610        | 369.22553     | 1.5          |
| 3            | 397.22101        | 397.22081     | 0.5          |
| 4            | 405.20363        | 405.20296     | 1.7          |
| 5            | 441.22476        | 441.22403     | 1.7          |
| 6            | 485.28736        | 485.28689     | 1.0          |
| 7            | 517.31357        | 517.31306     | 1.0          |
| 8            | 610.29865        | 610.29799     | 1.1          |
| 9            | 638.29357        | 638.29304     | 0.8          |
| 10           | 707.43542        | 707.43488     | 0.8          |
| 11           | 751.46164        | 751.46097     | 0.9          |
| 12           | 763.46164        | 763.46068     | 1.3          |
| 13           | 791.45655        | 791.45590     | 0.8          |
| 14           | 1002.54101       | 1002.54008    | 0.9          |
| 15           | 1020.55157       | 1020.55085    | 0.7          |

# 11, 24-Dihydroxy Zotarolimus Fragmentation Pattern

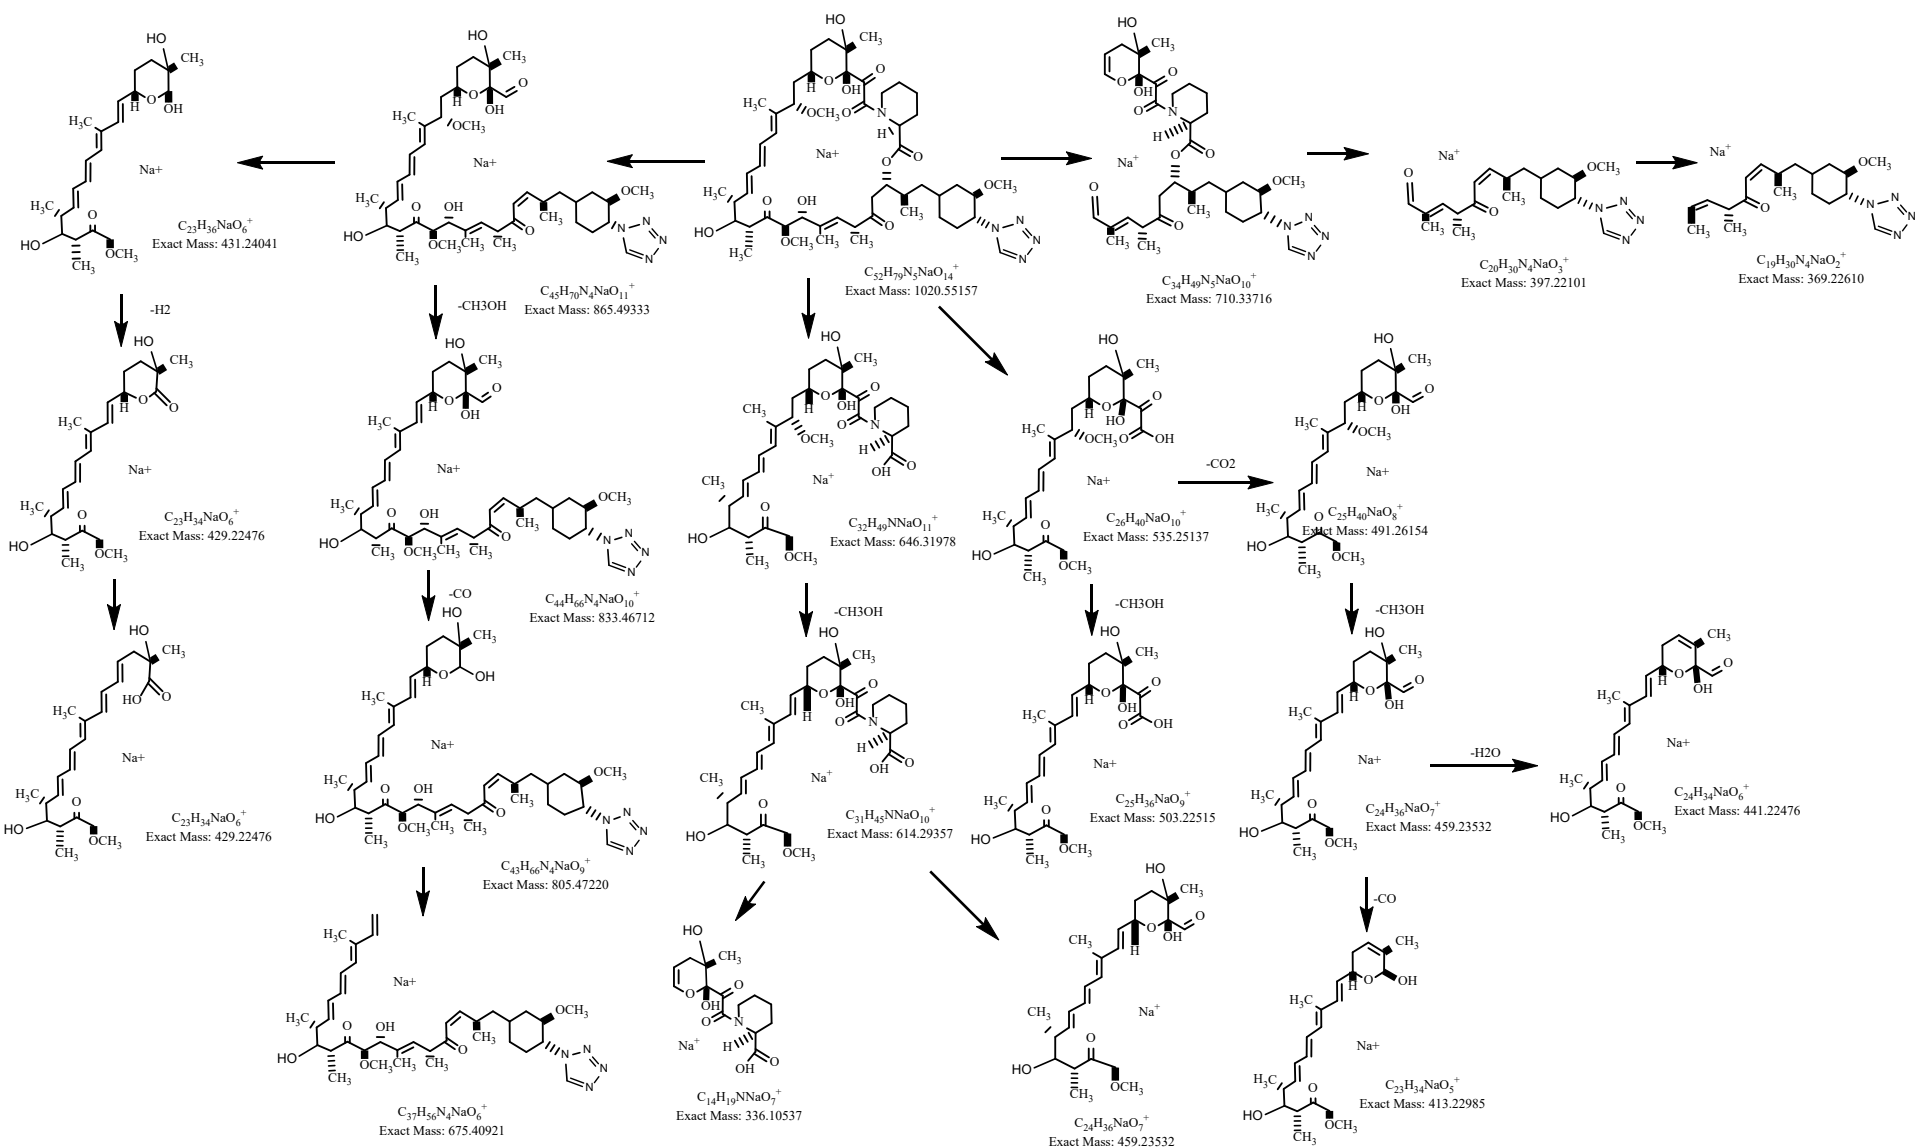



# 11, 24-Dihydroxy Zotarolimus with Water Loss Fragmentation Pattern

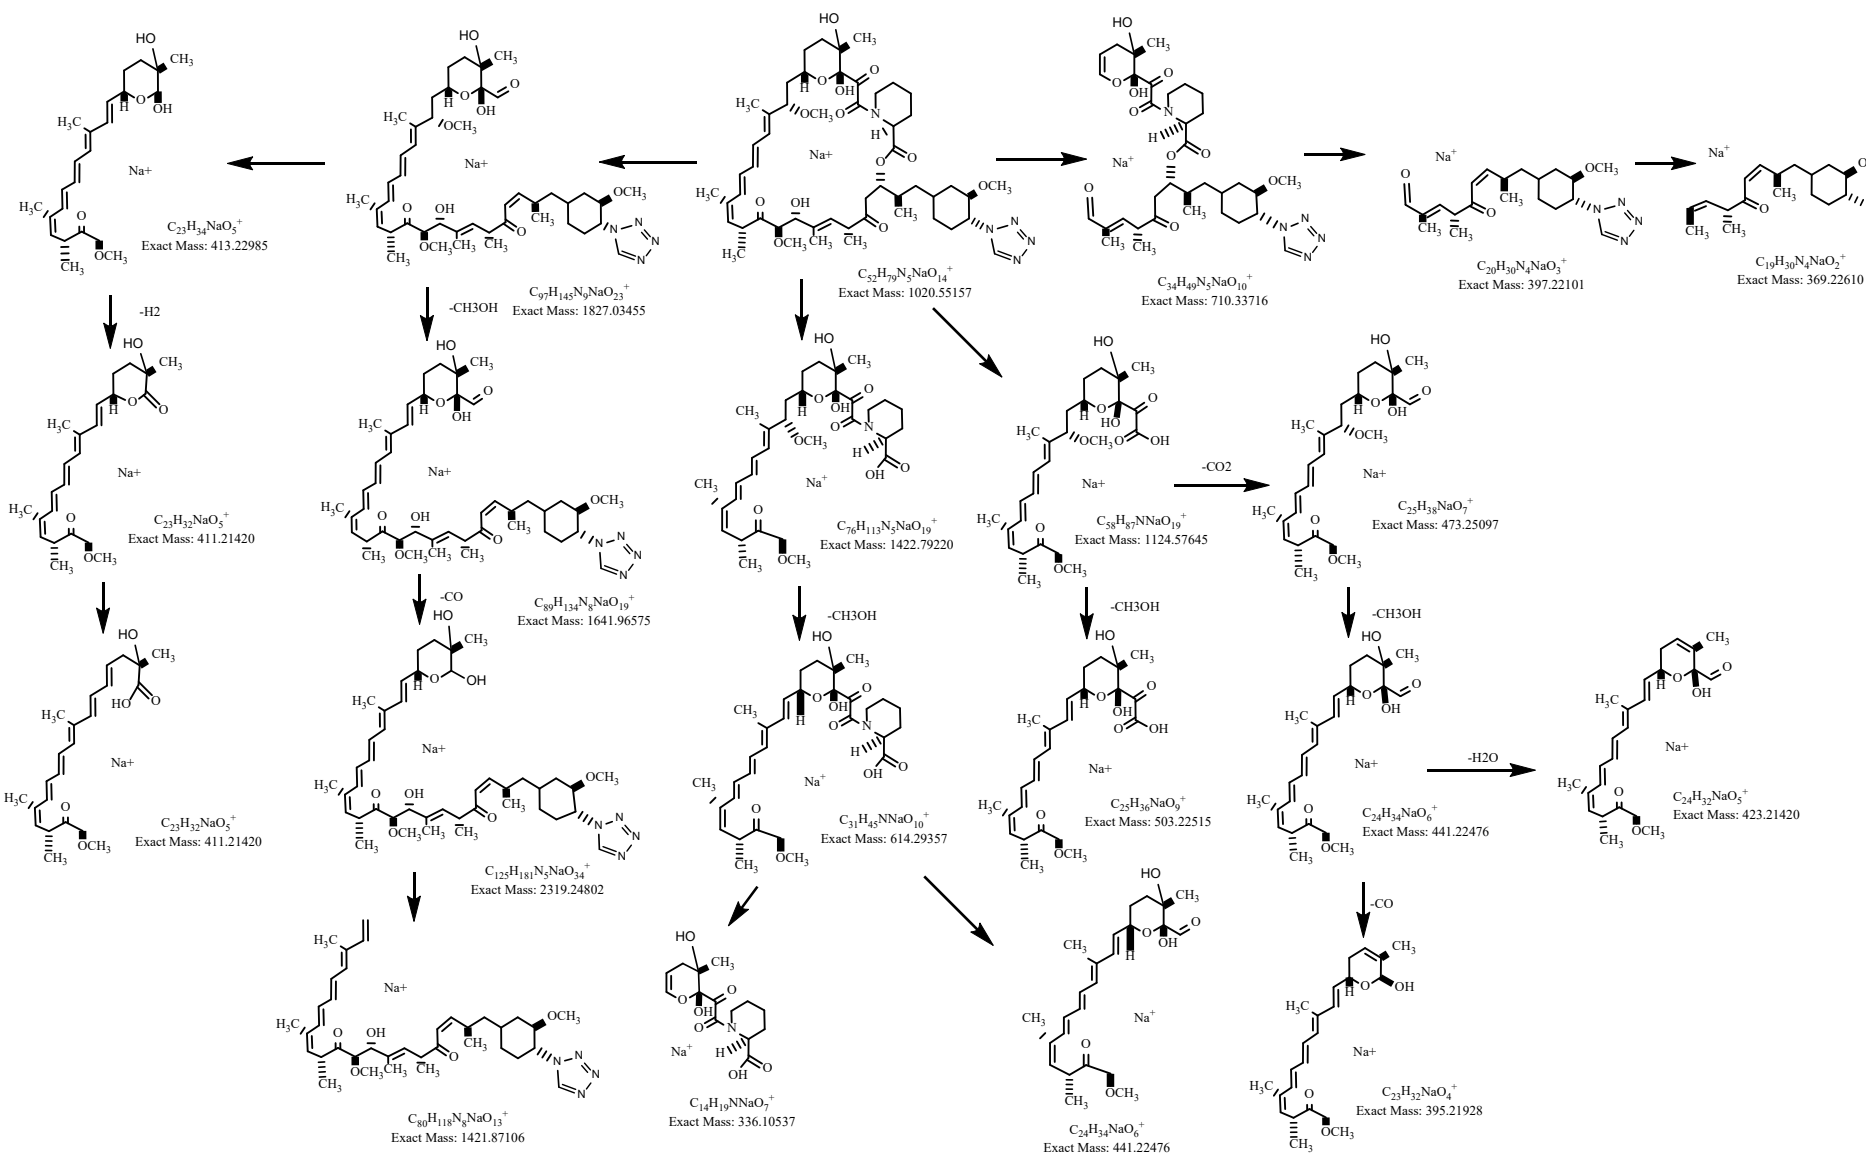

# 11, 24-Dihydroxy Zotarolimus Characteristic Fragmentation Pattern

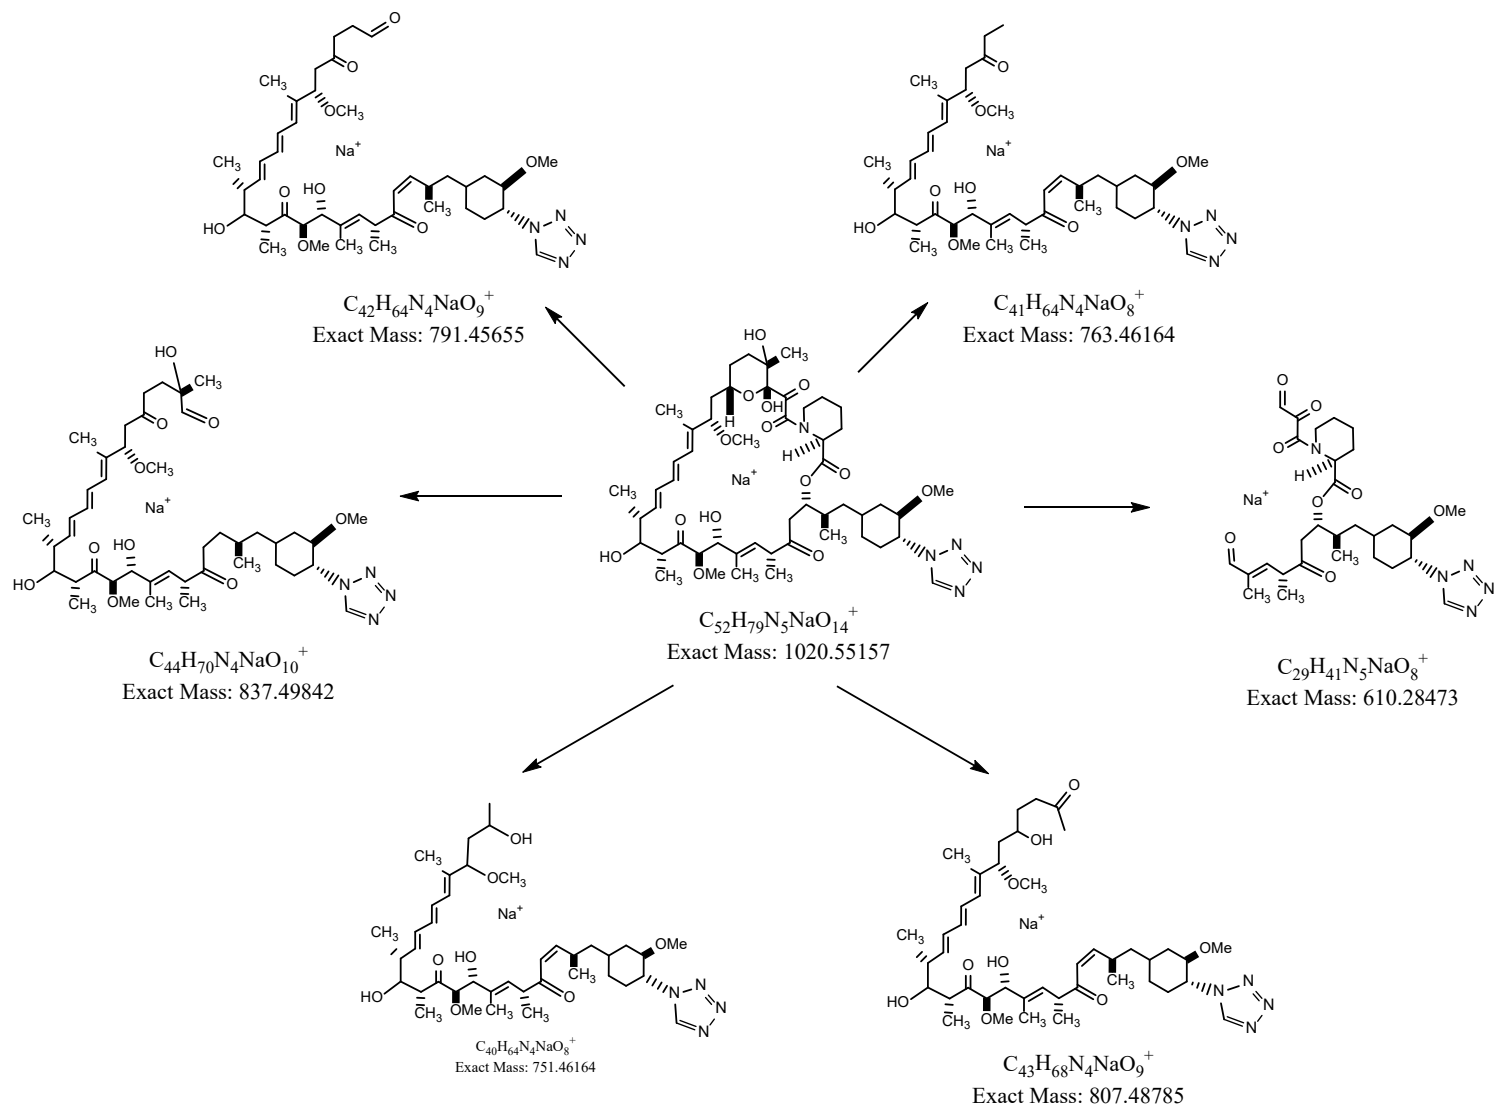

## Structural Confirmation of 11, 24-dihydroxy Zotarolimus

| Zotarolimus Fragments    | 11,24-dihydroxy Zotarolimus Fragments | Comments                                    |                                              |
|--------------------------|---------------------------------------|---------------------------------------------|----------------------------------------------|
|                          |                                       |                                             |                                              |
| 320.11046                | 336.10489                             | hydroxylation                               | 11, 12, 14, or OH-piperidine present         |
| 369.22610                | 369.22553                             | no hydroxylation                            | Rules out 47, 48, and 49-OH                  |
| 397.22101                | 397.220831                            | no hydroxylation                            | Rules out 47, 48, and 49-OH                  |
| 409.23493                | 441.22403                             | double hydroxylation with water loss        | 11, 12, 14, 23, 24, 45, or 46-OH present     |
| 427.2455                 | 405.20296                             | double hydroxylation with double water loss | 11, 12, 14, 23, 24, 45, or 46-OH present     |
| 441.26115                | (491.26154) ND                        | ND                                          | NA                                           |
| 453.22476                | 503.22406                             | double hydroxylation                        | 11, 12, 14, 23, 24, 45, or 46-OH present     |
| 485.25097                | 517.31306                             | double hydroxylation with water loss        | 11, 12, 14, 23, 24, 45, or 46-OH present     |
| 614.32995                | 646.31889                             | double hydroxylation                        | 11, 12, 14, 23, 24, 45, or 46-OH present     |
| 659.41429                | 675.40865                             | hydroxylation                               | 11, 12, 14, 23, 24, 45, or 46-OH present     |
| 694.34225                | 710.33716                             | ND                                          | 11, 12, 14, 23, 24, 45, or 46-OH present     |
| 755.47181                | 805.47220                             | very low                                    | 11, 12, 14, 23, 24, 45, or 46, 49-OH present |
| 783.46672                | 833.46712                             | very low                                    | 16, 27, or 39-O-desmethyl present            |
| 988.56174                | 1020.55085                            | no demethylation                            |                                              |
| Characteristic Fragments | 610, 763, 791                         |                                             |                                              |
| Determinant patterns     |                                       |                                             | water loss due to 24-hydroxylation position  |

# 12, 24-Dihydroxy Zotarolimus, m/z = 1020.55157

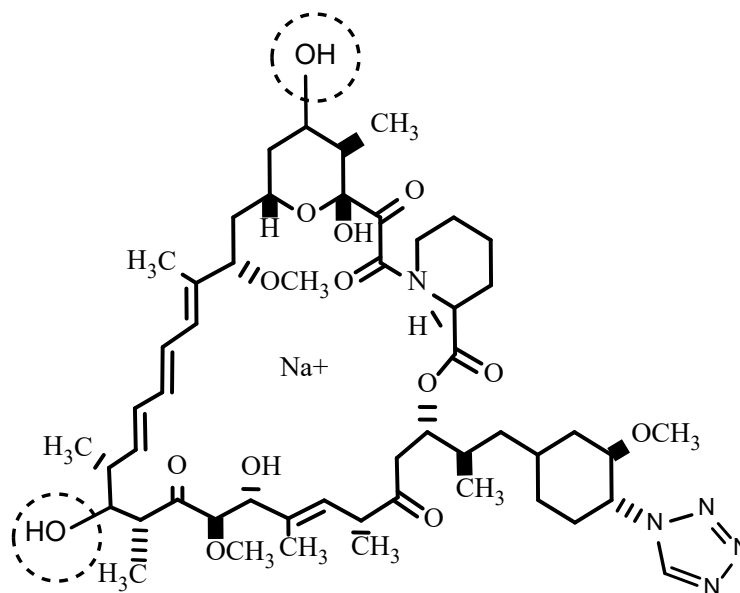

Chemical Formula:  $C_{52}H_{79}N_5NaO_{14}^+$

Exact Mass: 1020.55157

12, 24-dihydroxy zotarolimus

# Dihydroxy Zotarolimus Metabolites

## Extracted Ion Chromatogram (EIC), $m/z = 1020.55157$

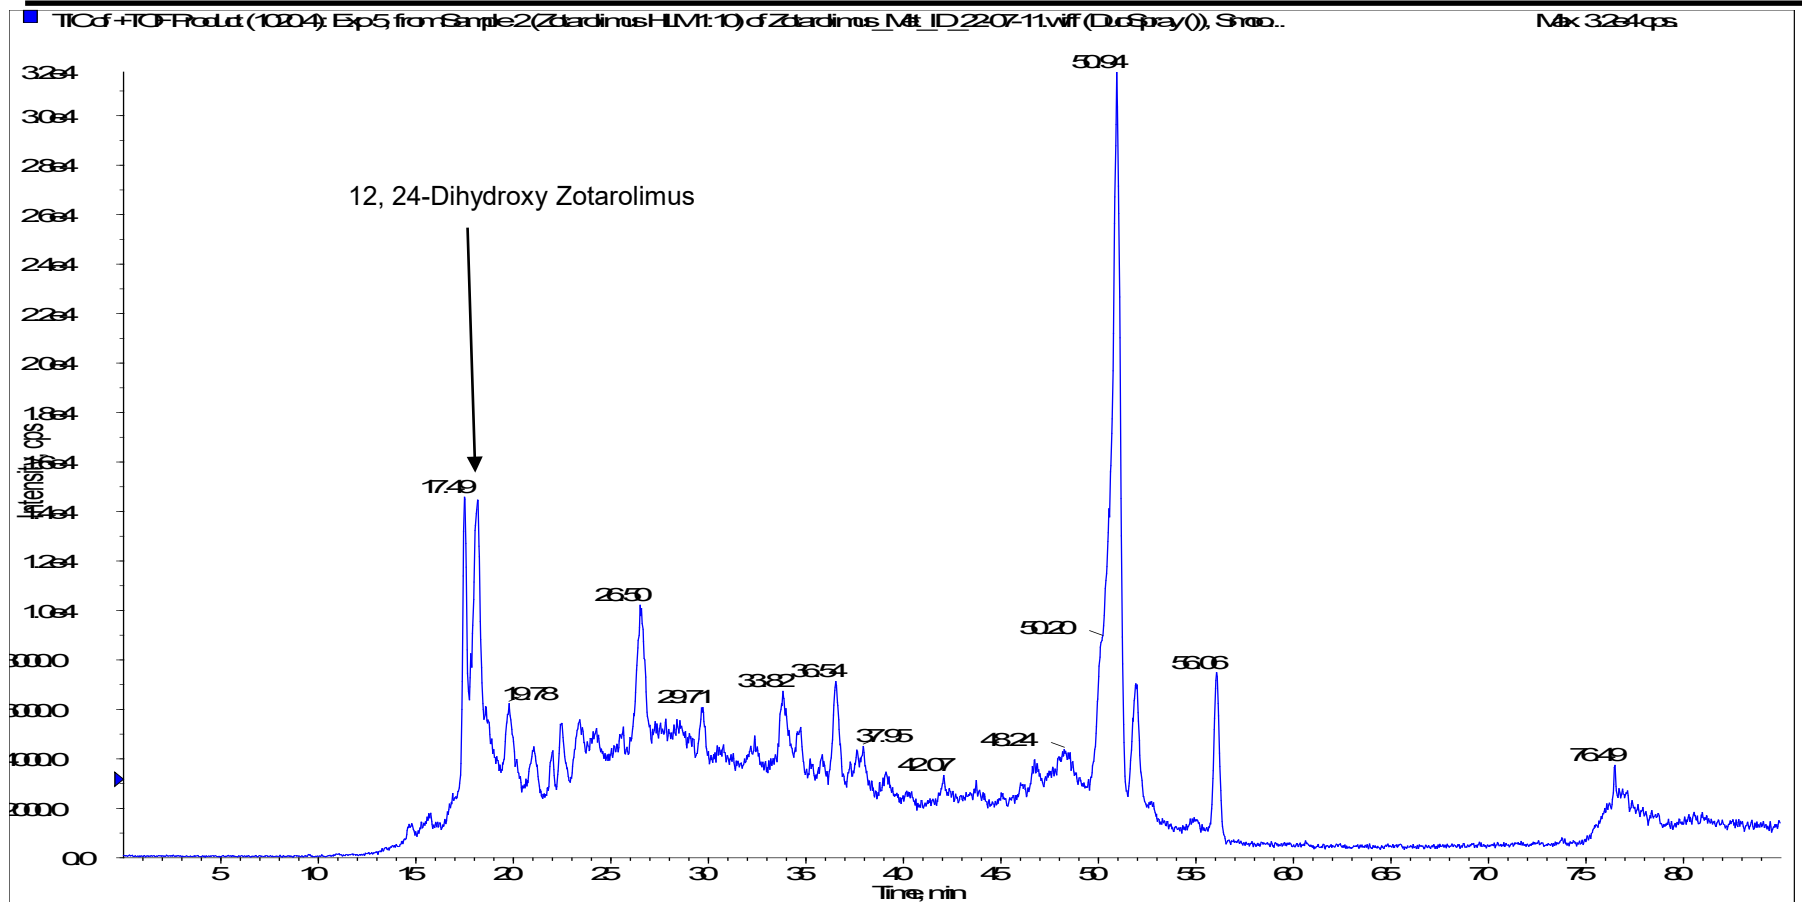

# 12, 24-Dihydroxy Zotarolimus

## Mass Spectrum (TOF Fragmentation)

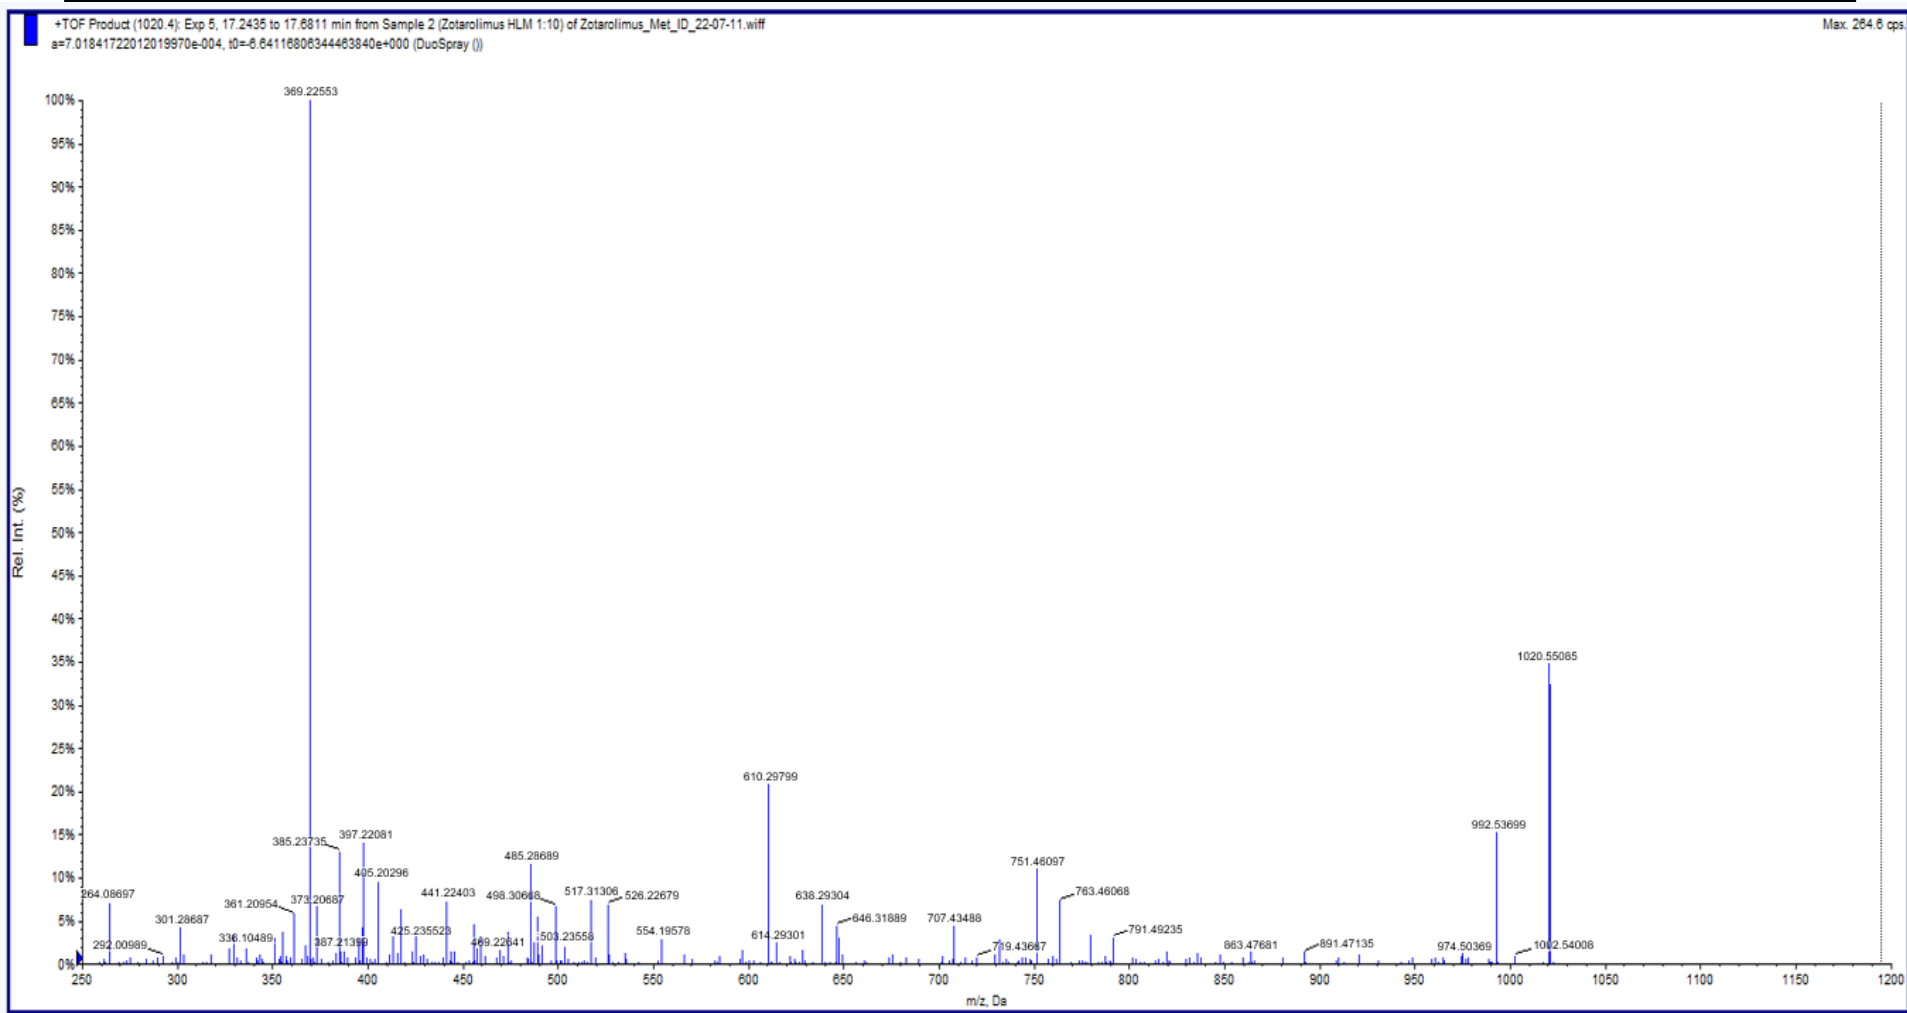

## $\Delta$ ppm of 11, 24-Dihydroxy Zotarolimus

---

| Fragment No. | Theoretical mass | Measured mass | $\Delta$ ppm |
|--------------|------------------|---------------|--------------|
| 1            | 336.10537        | 336.10493     | 1.3          |
| 2            | 369.22610        | 369.22573     | 1.0          |
| 3            | 397.22101        | 397.22081     | 0.5          |
| 4            | 405.20363        | 405.20288     | 1.9          |
| 5            | 441.22476        | 441.22437     | 0.9          |
| 6            | 485.28736        | 485.28703     | 0.7          |
| 7            | 517.31357        | 517.31322     | 0.7          |
| 8            | 610.29865        | 610.29811     | 0.9          |
| 9            | 638.29357        | 638.29296     | 1.0          |
| 10           | 707.43542        | 707.43463     | 1.1          |
| 11           | 751.46164        | 751.46088     | 1.0          |
| 12           | 763.46164        | 763.46077     | 1.1          |
| 13           | 791.45655        | 791.45539     | 1.5          |
| 14           | 1002.54101       | 1002.54011    | 0.9          |
| 15           | 1020.55157       | 1020.55033    | 1.2          |

# 12, 24-Dihydroxy Zotarolimus Fragmentation Pattern

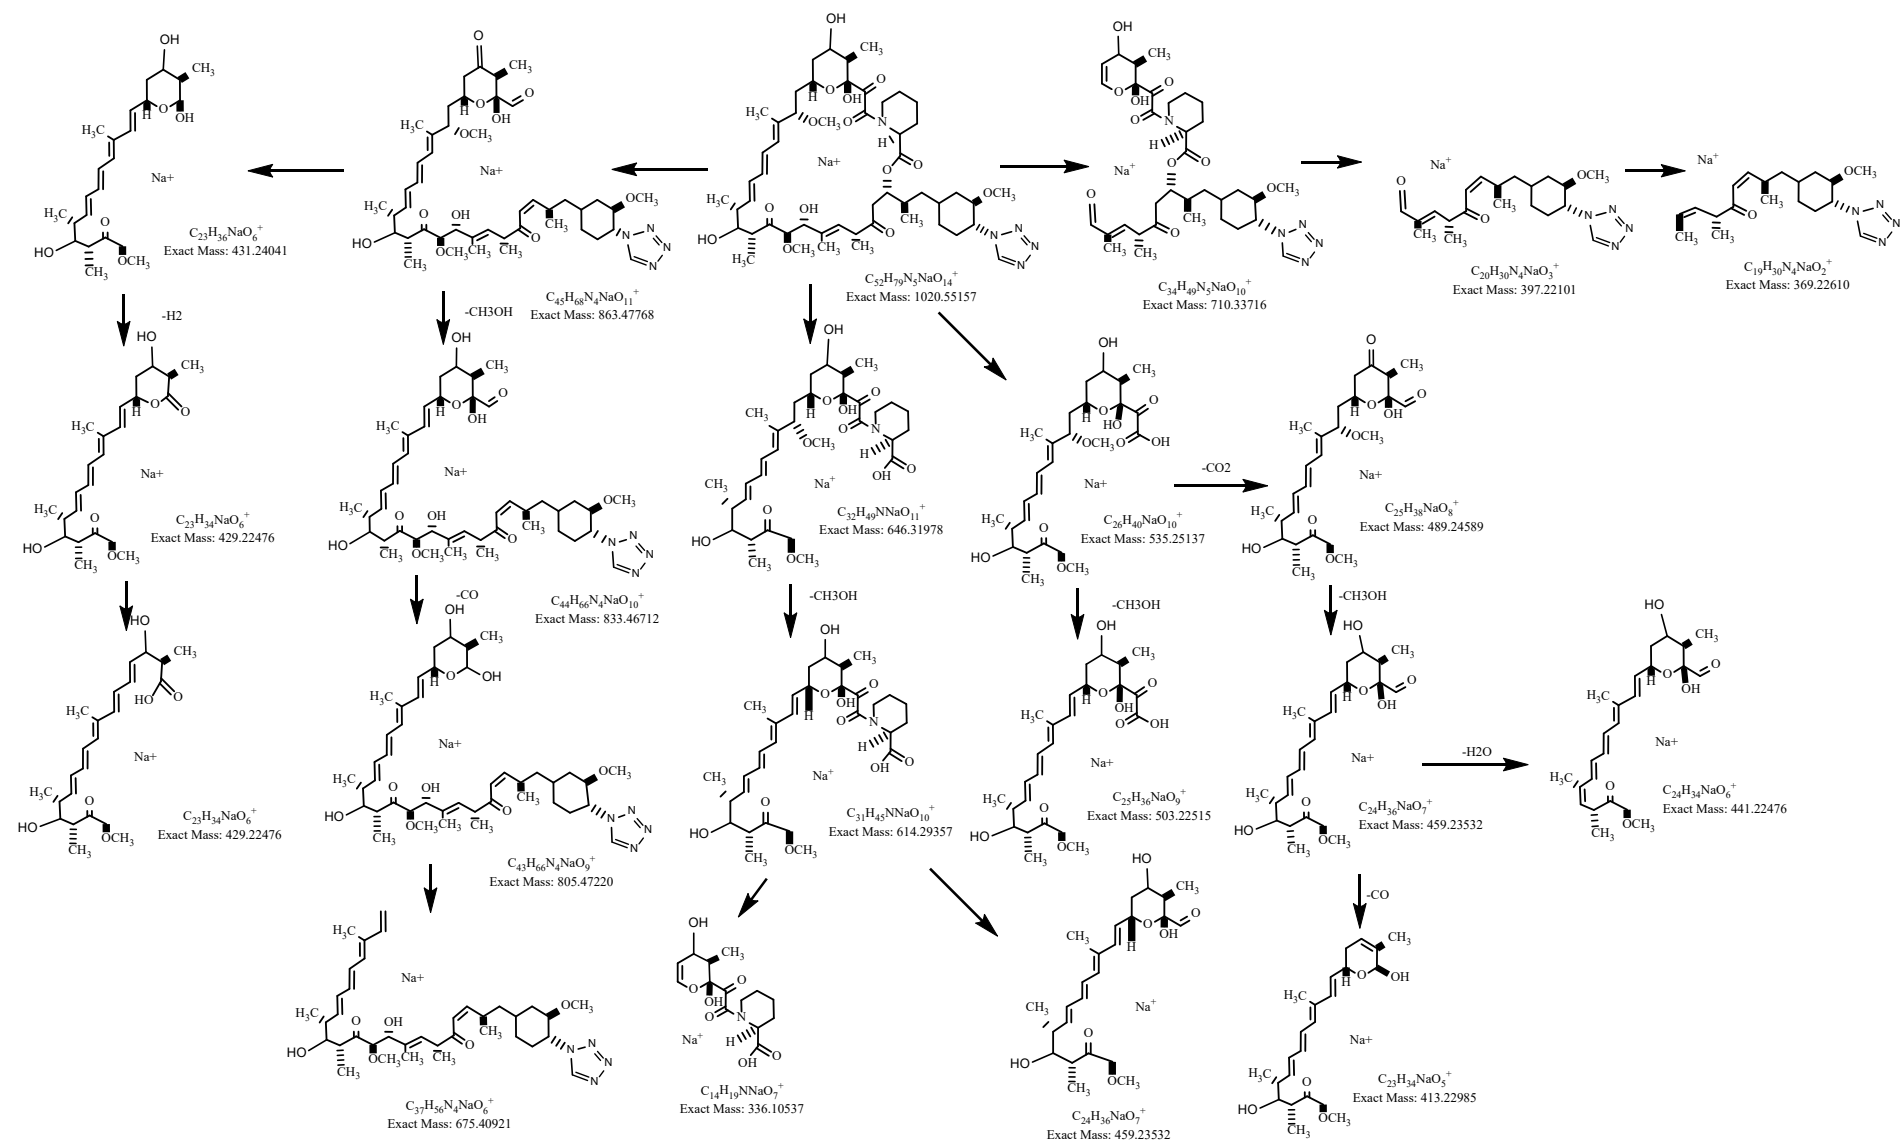



# Water loss of 12, 24-Dihydroxy Zotarolimus Fragmentation Pattern

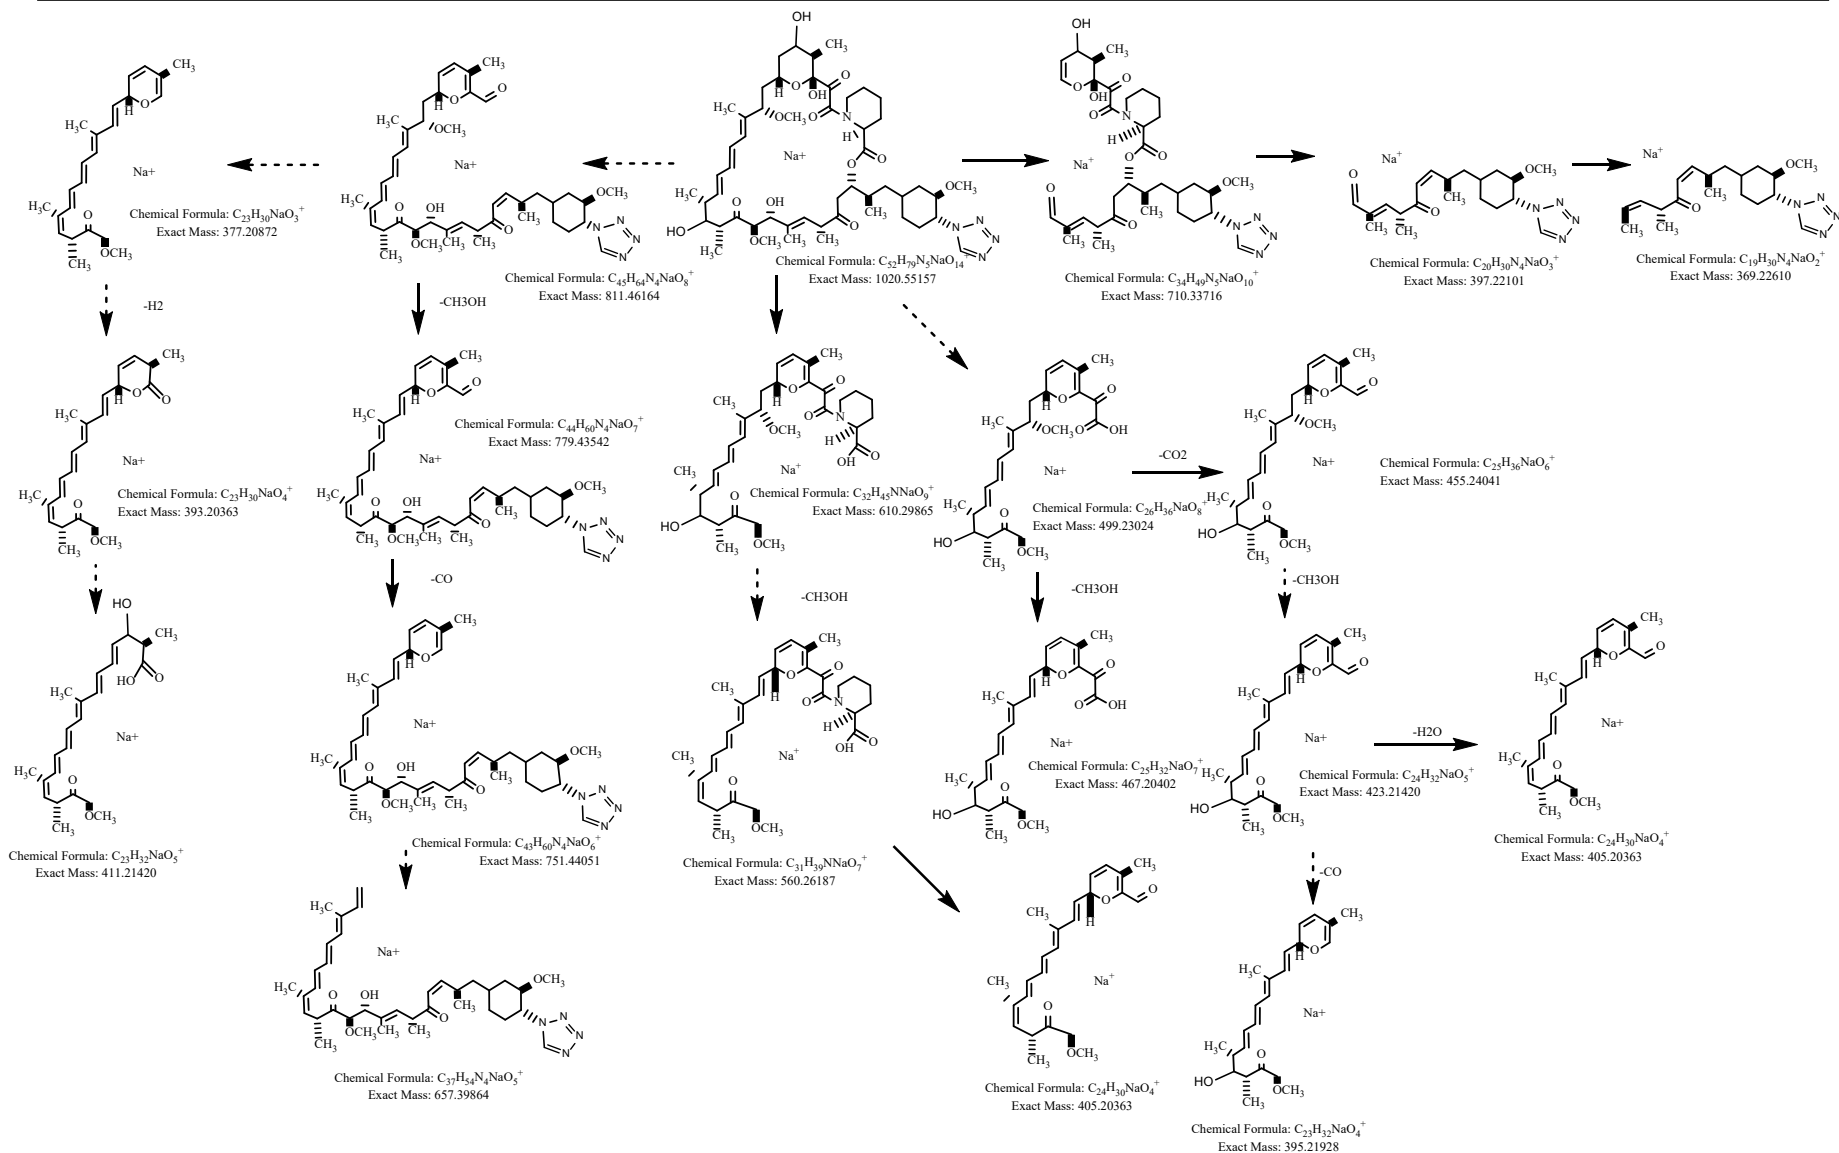

# 12, 24-Dihydroxy Zotarolimus Characteristic Fragmentation Pattern

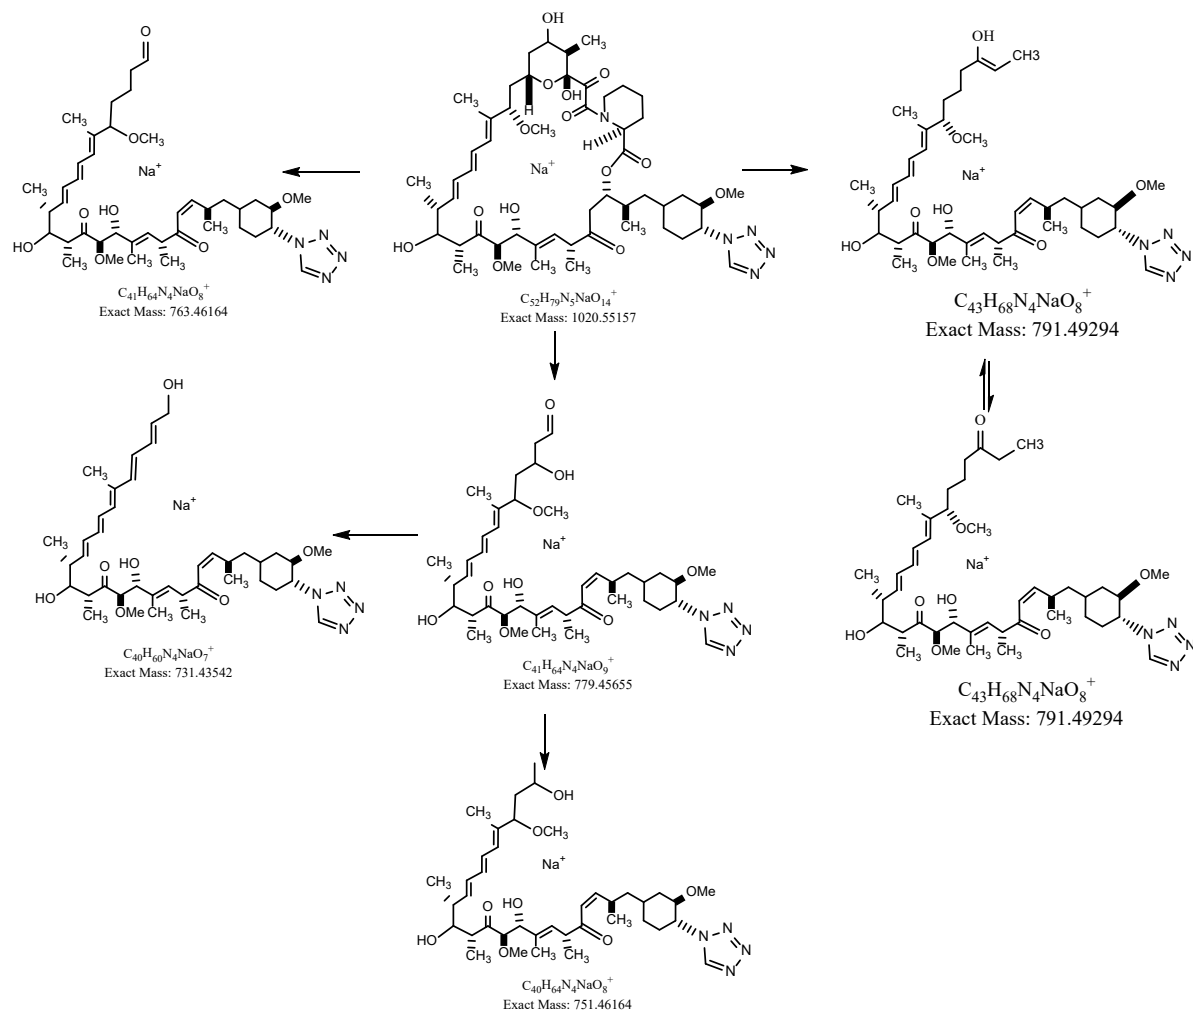

## Structural Confirmation of 12, 24-dihydroxy Zotarolimus

| Zotarolimus Fragments    | 12, 24-dihydroxy Zotarolimus Fragments | Comments                                    |                                                                                                                                                 |
|--------------------------|----------------------------------------|---------------------------------------------|-------------------------------------------------------------------------------------------------------------------------------------------------|
| 320.11046                | 336.10493                              | hydroxylation                               | 11, 12, 14, or OH-piperidine present                                                                                                            |
| 369.22610                | 369.22573                              | no hydroxylation                            | Rules out 47, 48, and 49-OH                                                                                                                     |
| 397.22101                | 397.22081                              | no hydroxylation                            | Rules out 47, 48, and 49-OH                                                                                                                     |
| 409.23493                | 441.22437                              | double hydroxylation with water loss        | 11, 12, 14, 23, 24, 45, or 46-OH present                                                                                                        |
| 427.2455                 | 405.20296                              | double hydroxylation with double water loss | 11, 12, 14, 23, 24, 45, or 46-OH present                                                                                                        |
| 441.26115                | (491.26154) ND                         | ND                                          | NA                                                                                                                                              |
| 453.22476                | 503.22406                              | double hydroxylation                        | 11, 12, 14, 23, 24, 45, or 46-OH present                                                                                                        |
| 485.25097                | 517.31306                              | double hydroxylation with water loss        | 11, 12, 14, 23, 24, 45, or 46-OH present                                                                                                        |
| 614.32995                | 646.31889                              | double hydroxylation                        | 11, 12, 14, 23, 24, 45, or 46-OH present                                                                                                        |
| 659.41429                | 675.40865                              | hydroxylation                               | 11, 12, 14, 23, 24, 45, or 46-OH present                                                                                                        |
| 694.34225                | 710.33716                              | ND                                          | 11, 12, 14, 23, 24, 45, or 46-OH present                                                                                                        |
| 755.47181                | 805.47220                              | very low                                    | 11, 12, 14, 23, 24, 45, or 46, 49-OH present                                                                                                    |
| 783.46672                | 833.46712                              | very low                                    | 16, 27, or 39-O-desmethyl present                                                                                                               |
| 988.56174                | 1020.55085                             | no demethylation                            |                                                                                                                                                 |
| Characteristic Fragments | 731, 763, 779, 791                     |                                             |                                                                                                                                                 |
| Determinant patterns     |                                        |                                             | double water loss only if 12-OH position presents:<br>$491 - 2 \times (18) = 455$<br>$646 - 2 \times (18) = 610$<br>$459 - 3 \times (18) = 405$ |

# 11, 47/48-Dihydroxy Zotarolimus, m/z = 1020.55157

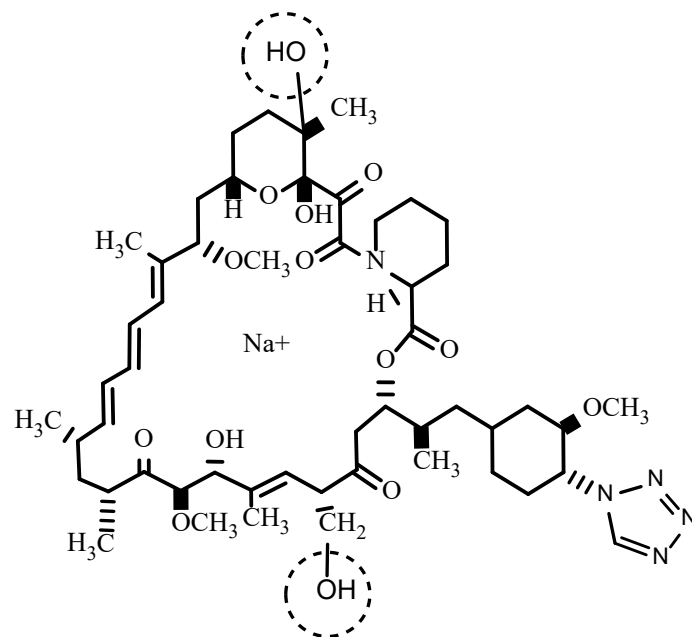

Chemical Formula:  $C_{52}H_{79}N_5NaO_{14}^+$

Exact Mass: 1020.55157

11, 47-dihydroxy zotarolimus

# Dihydroxy Zotarolimus Metabolites

## Extracted Ion Chromatogram (EIC), $m/z = 1020.55157$

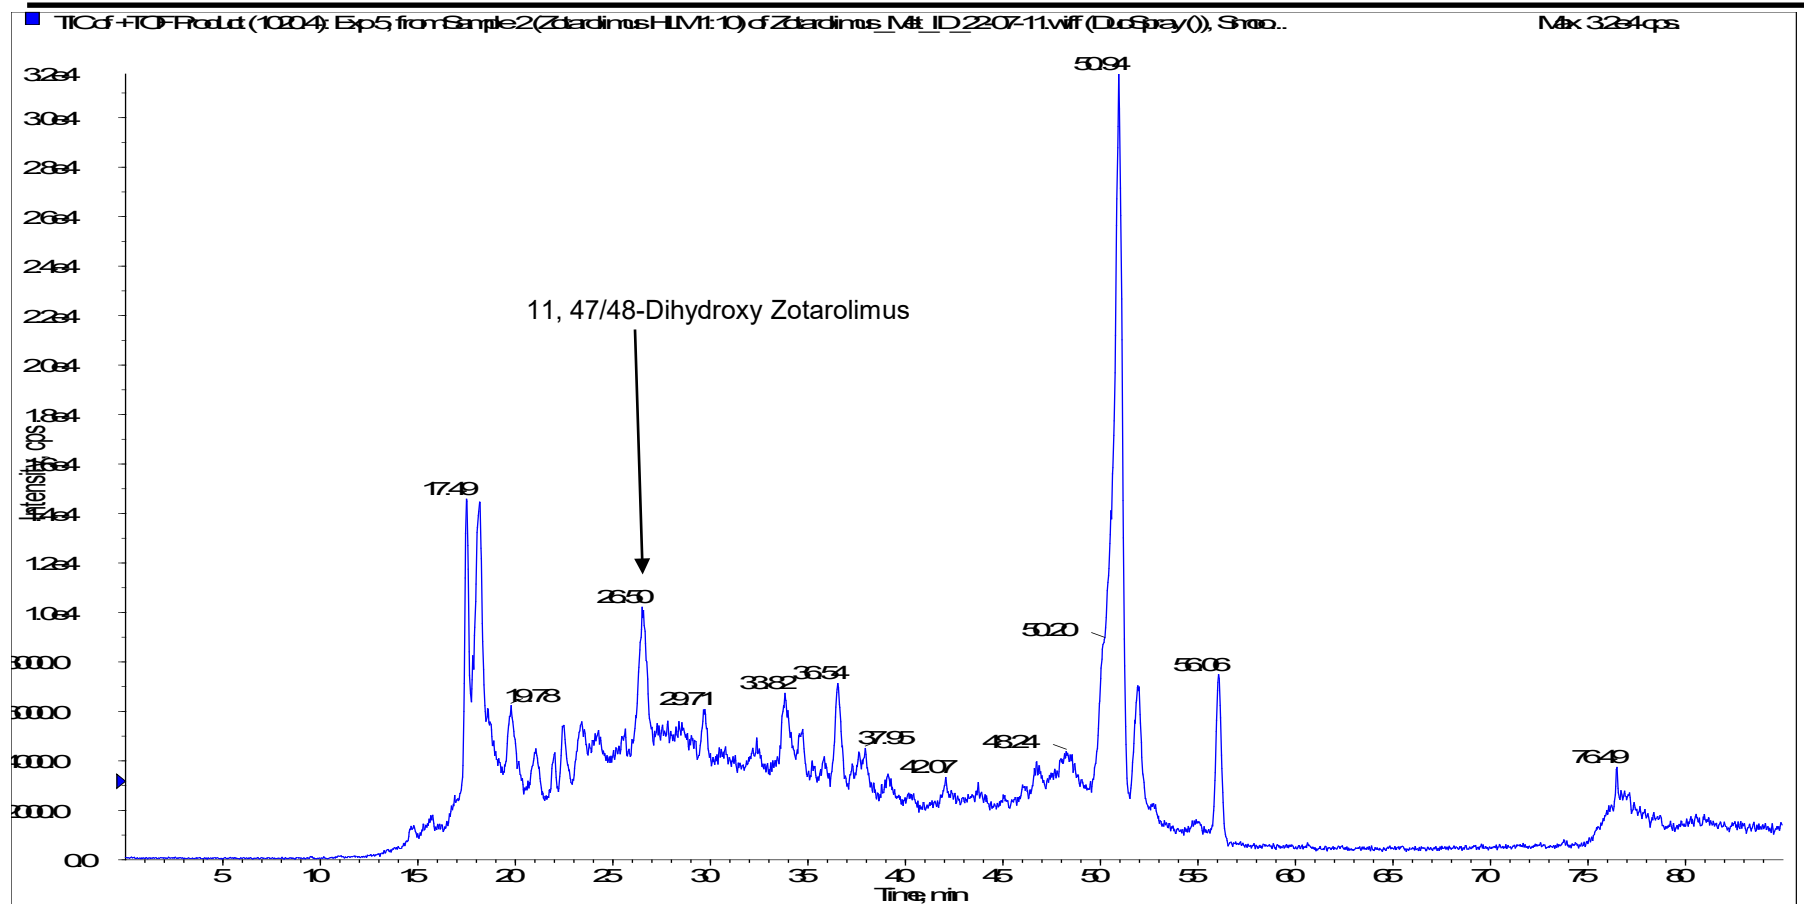

# 11, 47/48-Dihydroxy Zotarolimus

## Mass Spectrum (TOF Fragmentation)

+TOF Product (1020.4): Exp 5, 26.3660 to 26.8036 min from Sample 2 (Zotarolimus HLM 1:10) of Zotarolimus\_Met\_ID\_22-07-11.wiff  
a=7.01841722012019970e-004, t0=-6.64116806344463840e+000 (DuoSpray (I))

Max. 147.8 cps

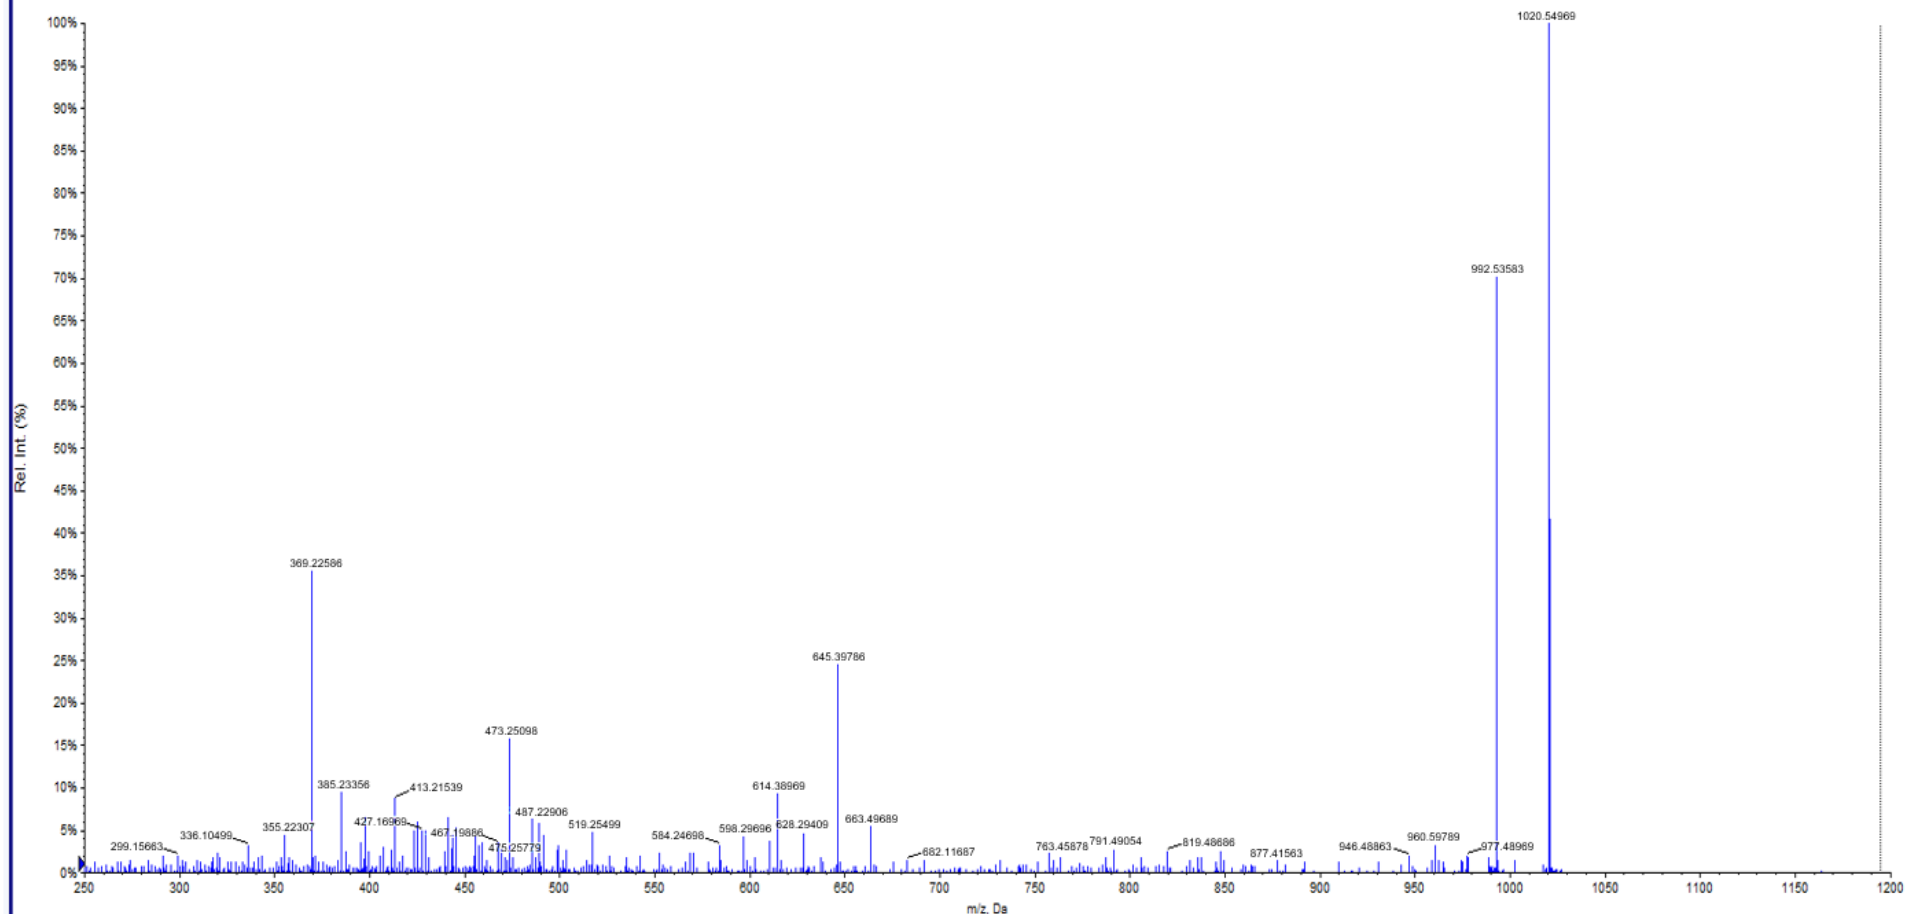

## $\Delta$ ppm of 11, 47/48-Dihydroxy Zotarolimus

---

| Fragment No. | Theoretical mass | Measured mass | $\Delta$ ppm |
|--------------|------------------|---------------|--------------|
| 1            | 336.10537        | 336.10499     | 1.1          |
| 2            | 355.22437        | 355.22307     | 3.7          |
| 3            | 369.2261         | 369.22586     | 0.7          |
| 4            | 385.23493        | 385.23356     | 3.6          |
| 5            | 413.21593        | 413.21539     | 1.3          |
| 6            | 425.22985        | 425.22885     | 2.4          |
| 7            | 443.24041        | 443.2396      | 1.8          |
| 8            | 457.25606        | 457.25537     | 1.5          |
| 9            | 473.25097        | 473.25098     | 0.0          |
| 10           | 487.23024        | 487.22906     | 2.4          |
| 11           | 519.25645        | 519.25499     | 2.8          |
| 12           | 598.29865        | 598.29696     | 2.8          |
| 13           | 628.2953         | 628.29409     | 1.9          |
| 14           | 763.46164        | 763.45878     | 3.7          |
| 15           | 791.49294        | 791.49054     | 3.0          |
| 16           | 819.48785        | 819.48686     | 1.2          |
| 17           | 837.49842        | 837.49736     | 1.3          |
| 18           | 1002.54101       | 1002.53869    | 2.3          |
| 19           | 1020.55157       | 1020.54969    | 1.8          |

# 11, 48-Dihydroxy Zotarolimus Fragmentation Pattern

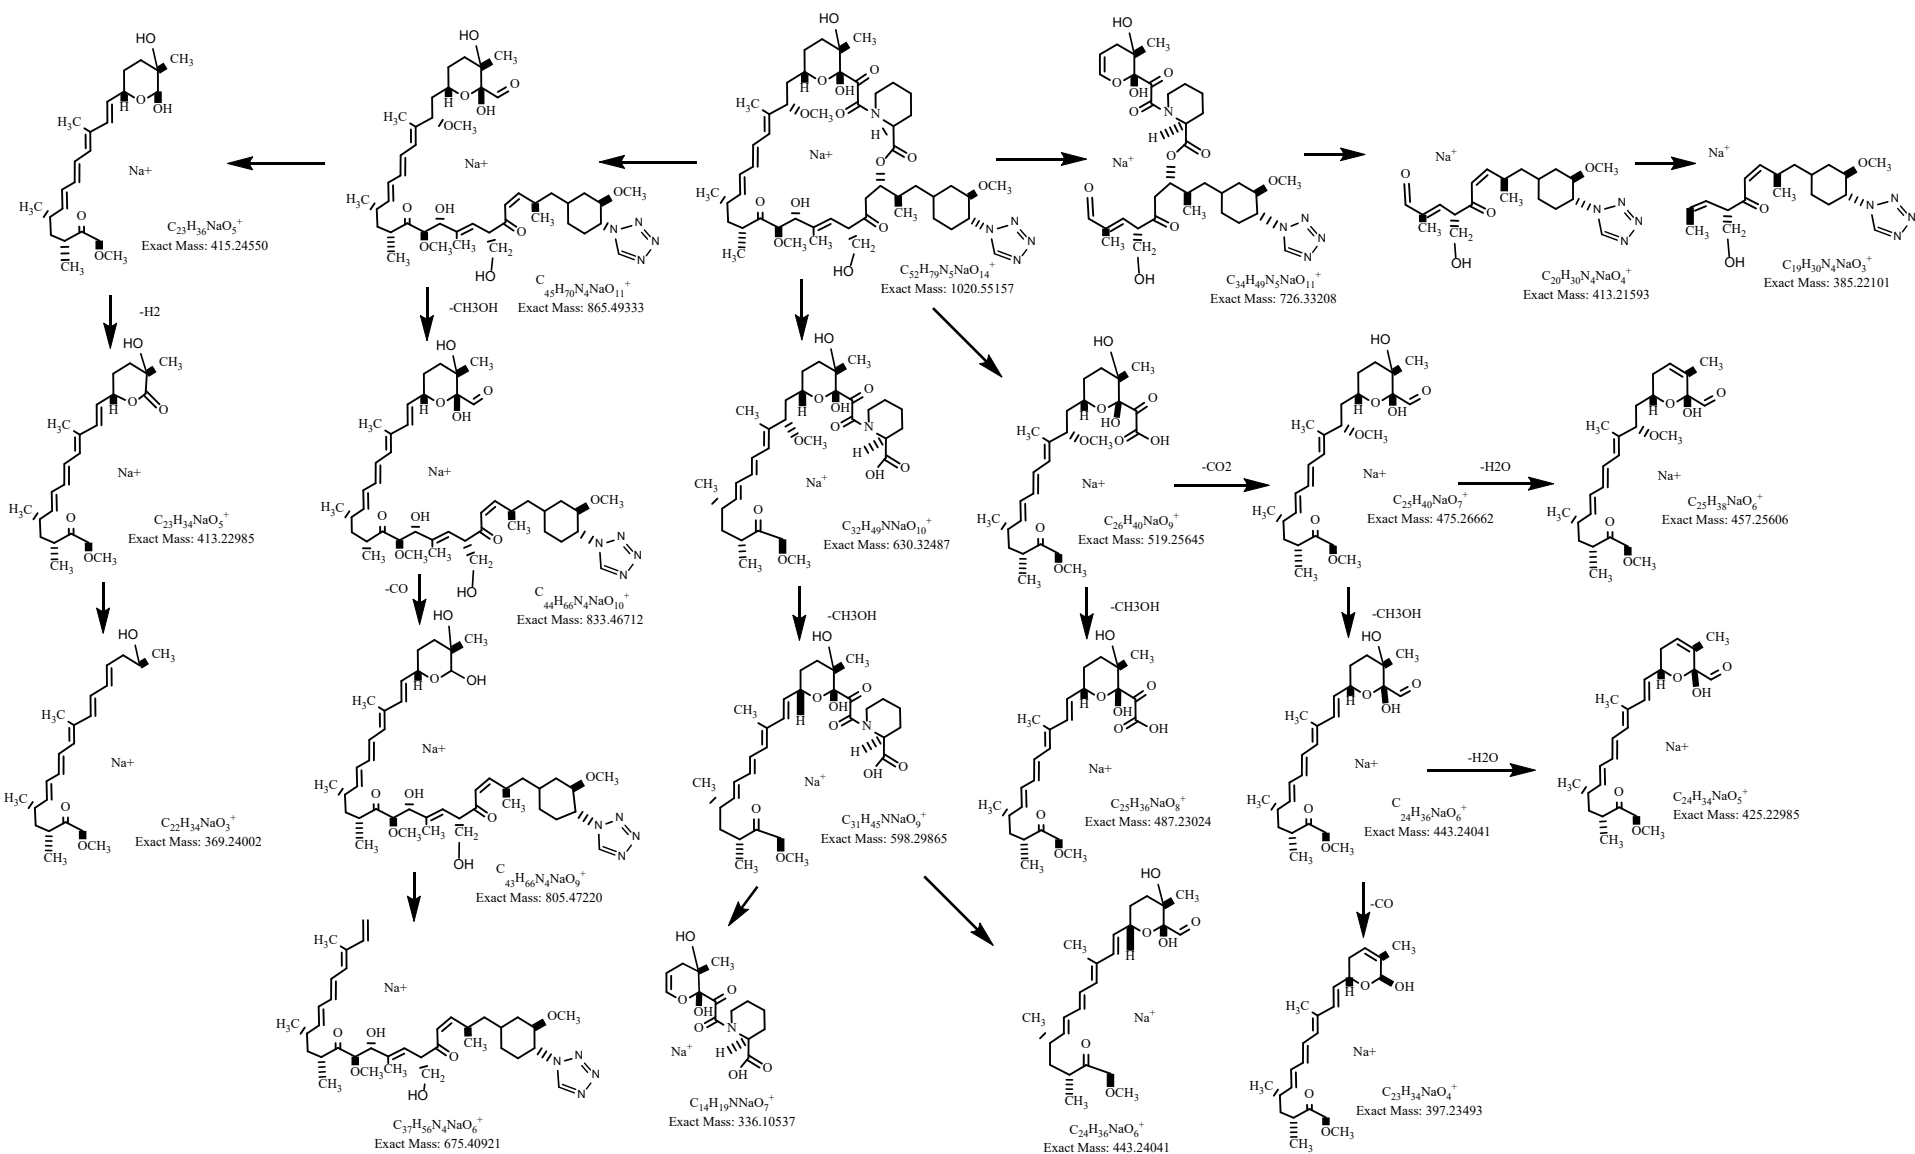



# 11, 48-Dihydroxy Zotarolimus Characteristic Fragmentation Pattern

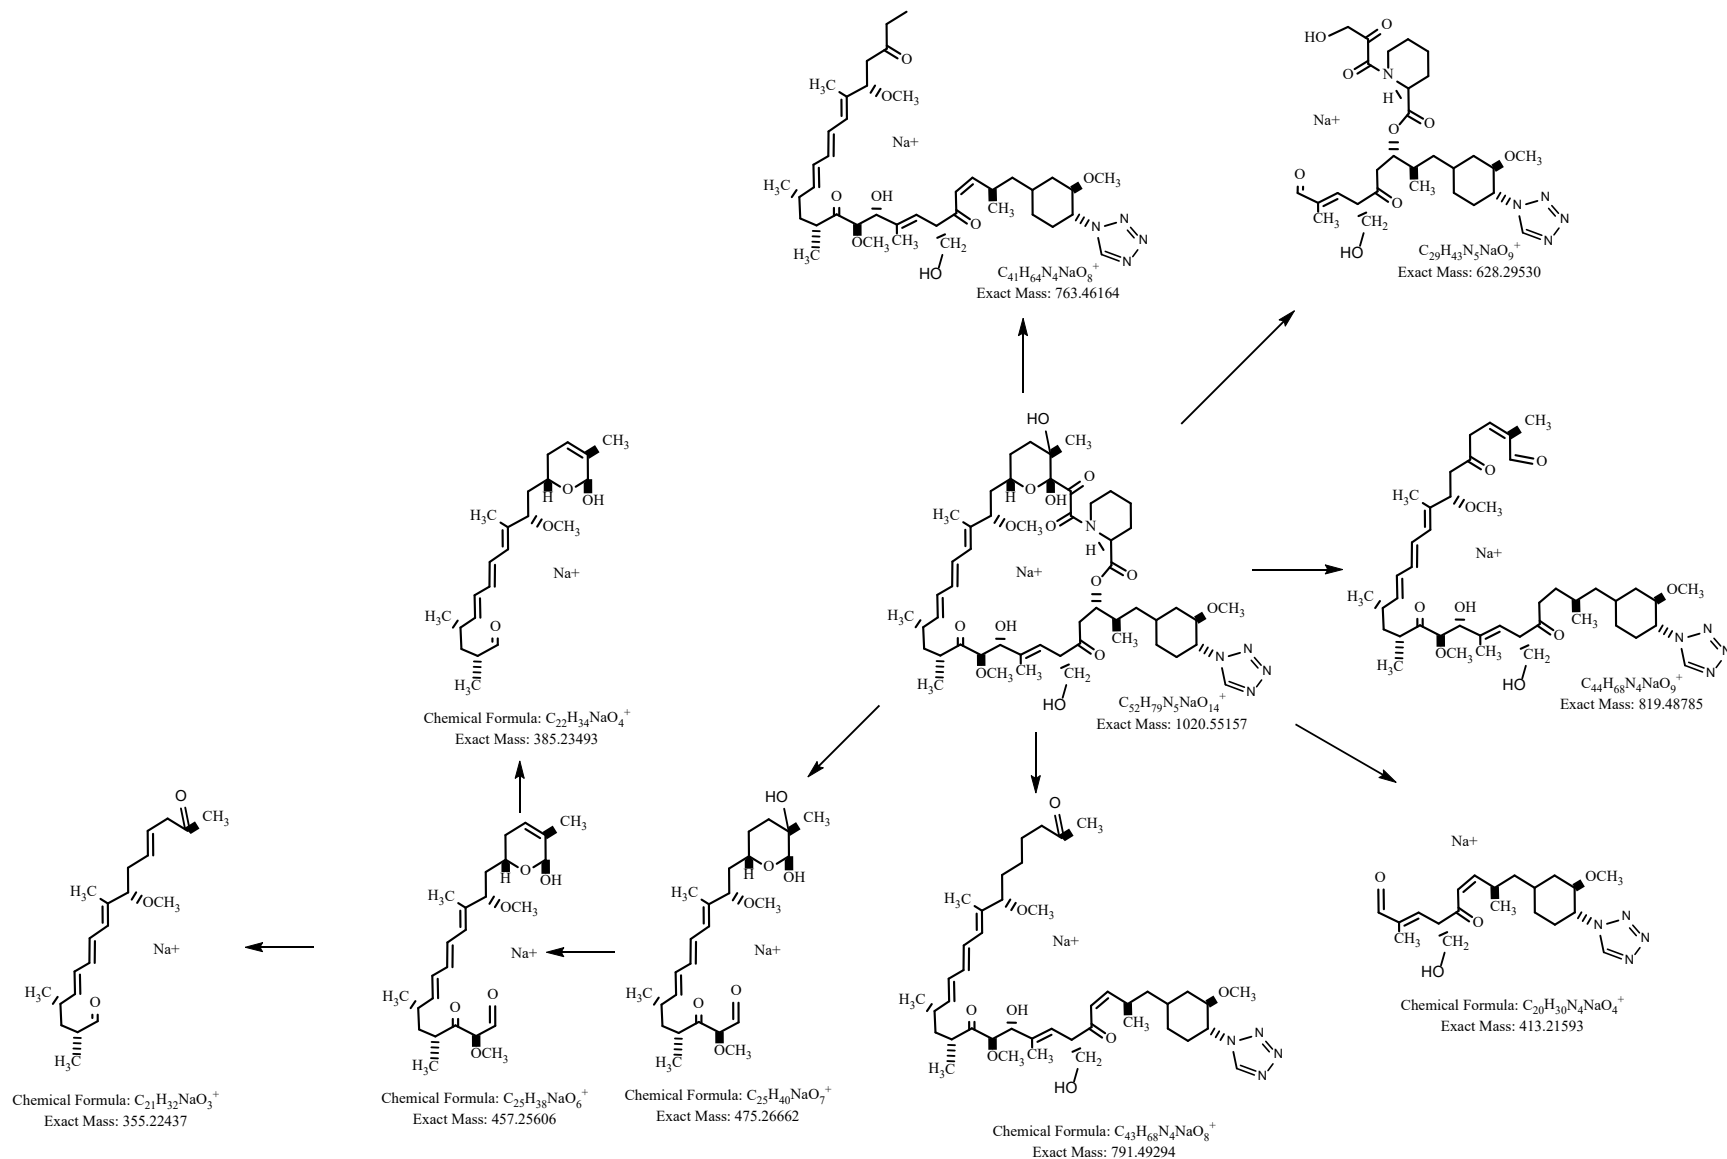

## Structural Confirmation of 11, 47/48-dihydroxy Zotarolimus

| Zotarolimus Fragments    | 11,47/48-dihydroxy Zotarolimus Fragments | Comments                      |                                                                                                        |
|--------------------------|------------------------------------------|-------------------------------|--------------------------------------------------------------------------------------------------------|
|                          |                                          |                               |                                                                                                        |
| 320.11046                | 336.10499                                | hydroxylation                 | 11, 12, 14, or OH-piperidine present                                                                   |
| 397.22101                | 413.21539                                | hydroxylation                 | confirms 48 or 49-OH                                                                                   |
| 409.23493                | 425.22885                                | hydroxylation                 | 11, 12, 14, 23, 24, 45, or 46-OH present                                                               |
| 427.2455                 | 443.23960                                | hydroxylation                 | 11, 12, 14, 23, 24, 45, or 46-OH present                                                               |
| 441.26115                | 457.25537                                | hydroxylation                 | 11, 12, 14, 23, 24, 45, or 46-OH present                                                               |
| 453.22476                | 487.22906                                | hydroxylation                 | 11, 12, 14, 23, 24, 45, or 46-OH present                                                               |
| 503.26154                | 519.25499                                | hydroxylation                 | 11, 12, 14, 23, 24, 45, or 46-OH present                                                               |
| 614.32995                | 630.32487                                | ND                            | 11, 12, 14, 23, 24, 45, or 46-OH present                                                               |
| 659.41429                | 675.40823                                | hydroxylation                 | 23, 24, 45, 46, 47, 48 or 49-OH present                                                                |
| 694.34225                | 726.33208                                | hydroxylation (low intensity) | 11, 12, 14, or OH-piperidine present                                                                   |
| 755.47181                | 805.47178                                | hydroxylation (low intensity) | 11, 12, 14, 23, 24, 45, 46, 47, 48, OR 49-OH present                                                   |
| 783.46672                | 833.46686                                | hydroxylation (low intensity) | 11, 12, 14, 23, 24, 45, 46, 47, 48, OR 49-OH present                                                   |
| 988.56174                | 1020.55085                               | hydroxylation                 |                                                                                                        |
| Characteristic Fragments | 355, 385, 413, 473, 763, 791, 819        |                               |                                                                                                        |
| Determinant patterns     |                                          |                               | no additional water loss at 11-OH position possible<br>No methanol loss possible at 47 or 48 positions |

## Representative negative and positive control samples: total ion chromatograms (TIC) measured on a Sciex API4000 triple quadrupole mass spectrometer

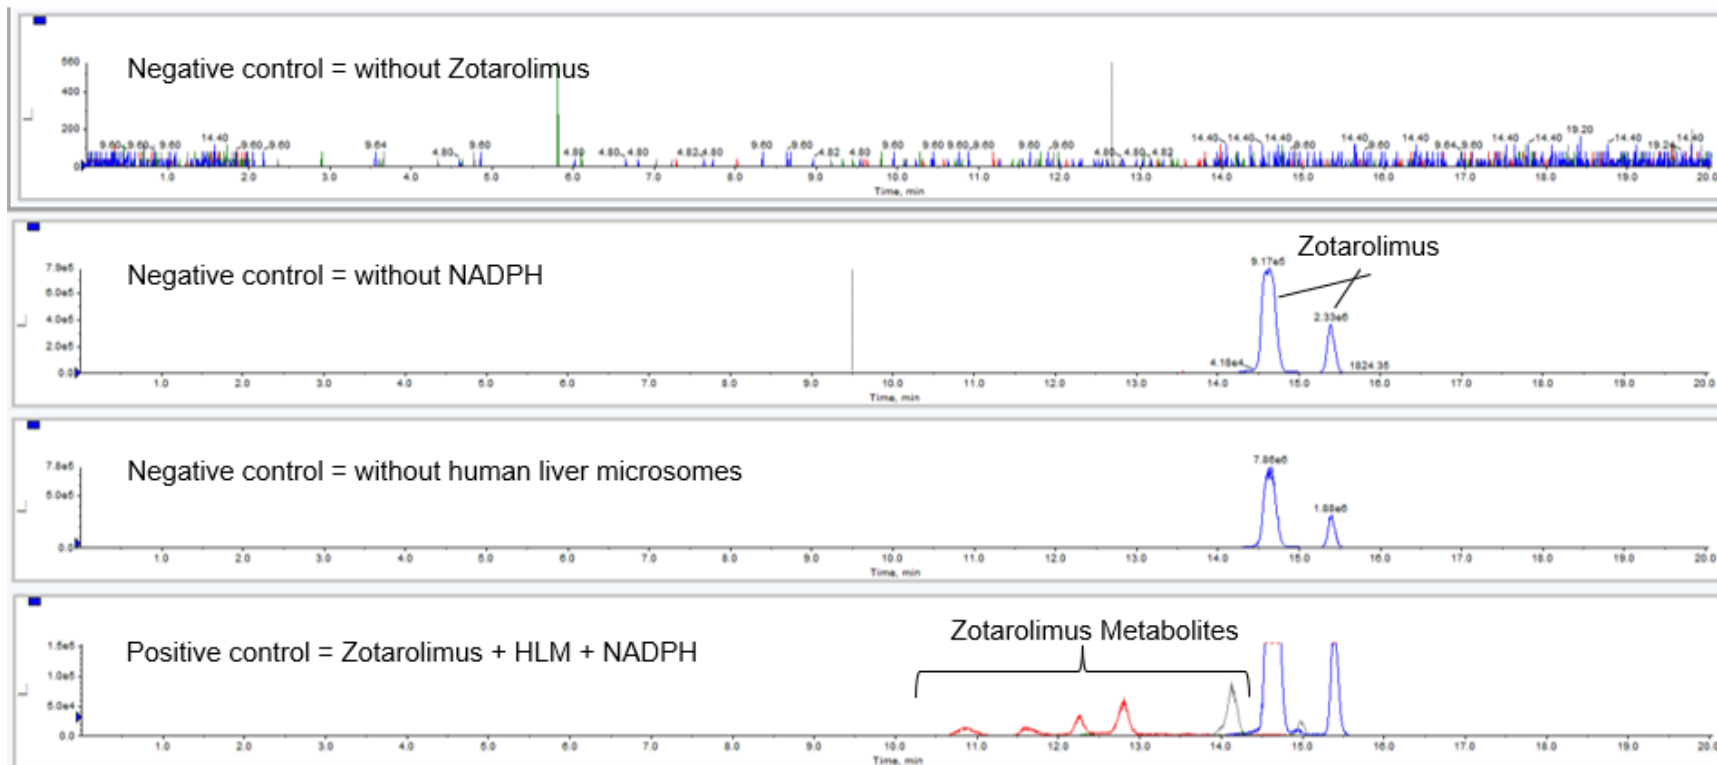

# Representative negative and positive control samples: total ion chromatograms (TIC) measured on the Sciex 5600+ triple TOF high-resolution mass spectrometer

Positive control  
Zotarolimus + HLM + NADPH

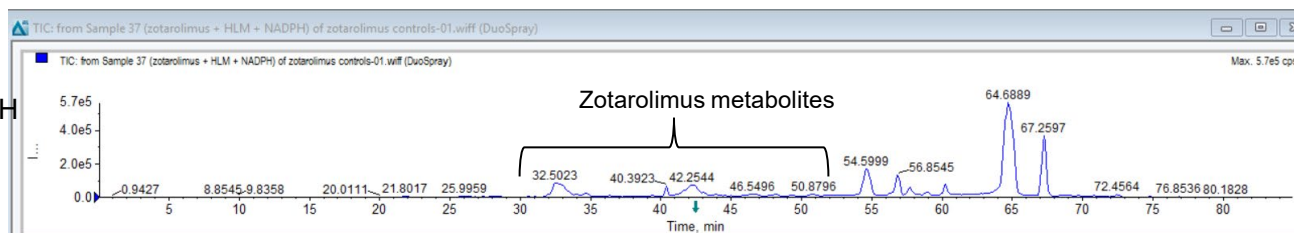

Without HLM

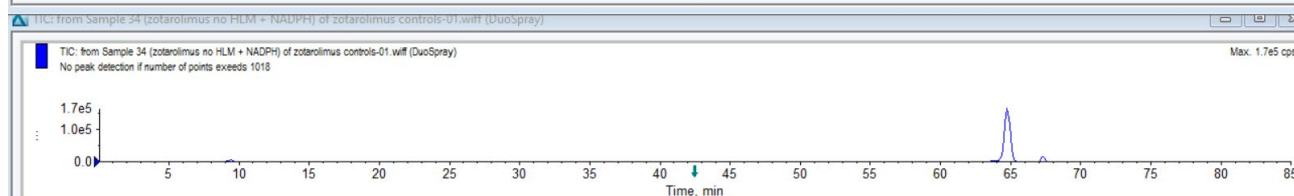

Without Zotarolimus

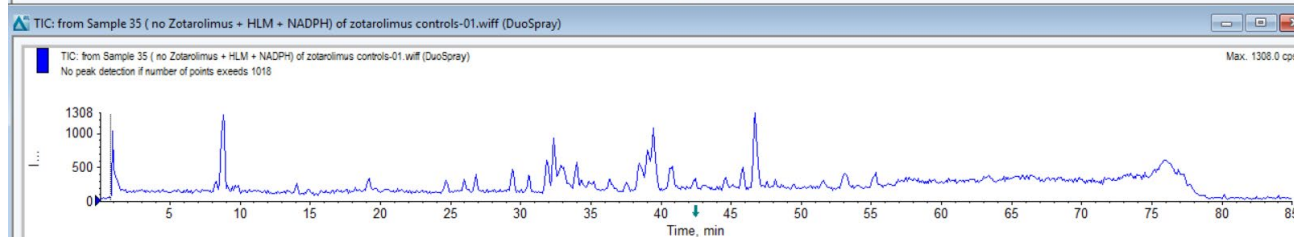

Without NADPH

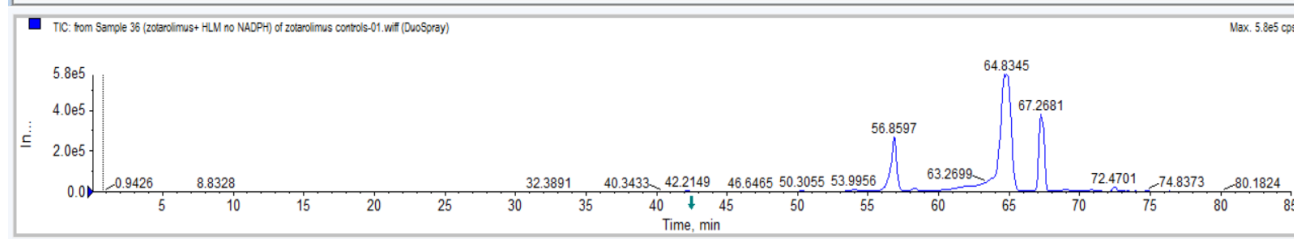

Supplement: s1 [file s1]
